# Supplementary material for: Unexpected long-term variations of Saturn’s ring current revealed by energetic neutral atom imaging
Source: Research Square preprint supplement (doi:10.21203/rs.3.rs-3271171/v1), 2023-09-18
Supplement: Supplementary file 1 [file 03ff98a54c24273e0b1c6641.xlsx]

## Sheet: Period5_ENA density
	0	1	2	3	4	5	6	7	8	9	10	11	12	13	14	15	16	17	18	19	20	21	22	23	24	25	26	27	28	29	30	31	32	33	34	35	36	37	38	39	40	41	42	43	44	45	46	47	48
0	2.4542	2.50039	2.50593	2.50664	2.54892	2.61841	2.66274	2.78773	2.81444	2.79645	2.76689	2.77682	2.77905	2.78128	2.78166	2.78112	2.77302	2.85868	2.86181	3.12438	3.18659	3.19009	3.37734	3.3929	3.52731	3.5841	3.48066	3.42756	3.55915	3.53705	3.5964	3.71716	3.77507	3.76738	3.84564	3.75001	3.71828	3.65369	5.49339	6.00819	6.28833	8.61979	7.96199	7.92306	7.3948	6.17631	8.4725	9.37214	9.79401
1	2.45964	2.50854	2.56894	2.59423	2.57069	2.6001	2.6491	2.75697	2.82921	2.88053	2.84065	2.80212	2.99873	2.79189	2.80212	2.90359	2.78169	2.80282	2.995	3.0786	3.19057	3.20723	3.33821	3.48462	3.46021	3.61959	3.63786	3.67759	3.60659	3.64468	3.6508	3.76704	3.84604	3.84586	3.78431	4.53253	4.1989	4.06586	5.12551	5.38678	6.58217	8.23534	9.10672	9.32614	8.65078	8.44048	8.51706	9.12437	9.75055
2	2.50593	2.57703	2.70821	2.61657	2.60807	2.61996	2.68451	2.7917	2.83891	2.88001	3.01813	3.04097	3.03114	3.06984	2.91985	2.91401	2.91401	2.82983	3.17024	2.95012	3.18662	3.23607	3.27212	3.42201	3.55927	3.67384	3.72883	3.66701	3.72947	3.73224	3.76588	3.76559	3.84584	4.0302	3.96439	4.11765	4.42801	4.7655	5.7819	6.55807	6.52053	7.83723	8.76287	9.75158	9.25119	9.33198	9.24818	10.1258	9.77281
3	2.50593	2.61657	2.71778	2.76387	2.71778	2.65024	2.61657	2.80212	2.89889	3.01743	2.9663	3.00647	3.10798	3.29971	3.10773	3.14551	3.18852	2.91401	3.14032	3.17024	3.29346	3.28034	3.41493	3.42632	3.53884	3.73639	3.74936	3.69688	3.72346	3.74047	3.86625	4.15526	4.24728	4.07861	4.25342	4.41608	4.99868	5.55948	6.71847	8.07733	7.52905	7.93072	9.32756	9.43069	9.91603	10.3823	9.99372	10.59	10.4496
4	2.55714	2.52198	2.71348	2.79127	2.86001	2.76777	2.70408	2.85893	2.96675	2.99809	3.15743	3.17669	3.17024	3.3342	3.27225	3.37862	3.37862	3.37862	3.15121	3.33646	3.21153	3.37662	3.41459	3.48844	3.58977	3.73124	3.76482	3.76559	3.76646	3.79337	3.83177	3.94467	5.50588	5.16866	4.31702	4.87415	4.9728	5.93926	7.51047	8.74018	8.65258	7.42293	9.2199	9.91369	10.5819	10.5489	10.8777	10.8925	10.8127
5	2.5223	2.67218	2.67479	2.76672	2.8548	2.8812	2.86302	2.767	2.98509	3.18314	3.28285	3.24328	3.38998	3.38942	3.48401	3.43974	3.5146	3.40069	3.39353	3.38556	3.27145	3.38283	3.48844	3.52448	3.50994	3.61674	3.79986	3.92491	4.00205	3.92336	3.9184	3.9184	4.19157	5.84829	6.24253	5.27482	6.46143	6.29419	8.44986	10.2079	10.0192	8.34866	10.1606	10.4982	10.5345	10.709	10.8414	11.1884	11.675
6	2.58184	2.57784	2.65608	2.77742	2.93135	3.07548	2.89218	2.88001	2.93046	3.08845	3.29556	3.37937	3.39427	3.38089	3.52536	3.581	3.57989	3.52527	3.57074	3.54851	3.45975	3.39756	3.53079	3.53846	3.5238	3.54109	3.69245	3.81424	4.1988	4.2354	4.19376	4.09866	4.15639	4.4918	5.93983	7.8573	7.32636	6.11979	8.19551	9.65174	10.7068	9.65469	9.74945	10.4782	10.3614	10.1999	10.8331	11.3089	11.8429
7	2.48854	2.65317	2.65278	2.68469	2.76612	3.13325	3.05663	3.08627	2.88106	2.91269	3.19073	3.37899	3.43371	3.53306	3.52527	3.56916	3.6527	3.58313	3.71504	3.58313	3.59651	3.73881	3.64699	3.61914	3.61576	3.6158	3.64909	3.8726	4.05014	4.29158	4.33788	4.44473	4.26825	4.32942	5.07921	6.41092	9.45841	9.06265	8.90234	9.92835	9.97598	9.91574	10.8766	10.9766	10.5746	10.7365	11.054	11.1713	11.6954
8	2.6298	2.68504	2.67623	2.73266	2.79157	2.90683	3.19225	3.22341	3.17041	3.10085	3.18314	3.29307	3.37862	3.54176	3.52704	3.52526	3.58856	3.74277	3.72178	3.70272	3.76559	3.75944	3.78079	3.82485	3.7811	3.72839	3.80338	3.89539	4.17406	4.28484	4.45188	4.35248	4.5584	4.54683	4.67927	5.04508	7.76582	9.72781	10.8514	10.6727	9.16945	10.0555	10.8675	11.0746	11.1522	11.3247	11.1283	11.4991	11.869
9	2.67575	2.68392	2.76251	2.7721	2.77682	2.84669	3.08704	3.2823	3.35585	3.32986	3.25583	3.35726	3.46147	3.54085	3.57374	3.57359	3.58258	3.76313	3.75821	3.76559	3.68331	3.80231	3.78346	3.87182	4.00347	3.93775	3.84163	3.97207	4.17324	4.29644	4.39813	4.59627	4.81224	4.98144	4.7089	4.87845	6.94958	9.06122	9.42079	11.2458	11.0921	10.5984	10.2316	10.8868	11.3325	11.5452	11.1611	12.0054	12.0334
10	2.71765	2.74705	2.74745	2.88133	2.88001	2.93441	3.11269	3.2172	3.2922	3.35629	3.35629	3.47152	3.6613	3.5915	3.68423	3.6805	3.60072	3.71585	3.68526	3.65891	3.80231	3.87556	4.01359	3.86634	4.14179	4.22213	4.13918	4.25279	4.28071	4.31691	4.48149	4.54719	4.63152	4.78159	5.7965	5.8526	6.62359	9.22415	10.1973	11.1642	11.1827	11.209	10.7774	11.2567	11.3662	11.5239	11.3054	11.7669	12.4203
11	2.77682	2.80887	2.82622	2.83352	3.01155	3.05571	3.14576	3.28485	3.35629	3.35629	3.35765	3.46282	3.705	3.71816	3.72961	3.76317	3.75954	3.68519	3.80231	3.80231	3.76662	3.84678	4.08556	3.95867	4.17223	4.34315	4.15187	4.36228	4.54749	4.64304	4.74808	4.93866	5.16922	6.30675	6.13625	6.08544	6.88069	7.47723	9.96505	11.4365	11.1753	11.4325	11.4126	11.584	11.6029	11.5212	11.6374	11.8537	12.0732
12	2.83288	2.8996	2.87297	3.01798	2.9829	3.1779	3.28485	3.28592	3.35585	3.36602	3.40184	3.4511	3.68464	3.87403	3.89039	3.89982	3.87403	3.84363	3.89982	3.85174	3.9335	4.00363	4.09929	4.09929	4.05307	4.50399	4.55847	4.48502	4.514	5.03311	5.19092	5.45382	5.53373	6.15809	6.58763	6.47728	7.44259	7.99209	9.68421	10.9007	11.4969	11.4089	11.3548	11.7617	12.3952	11.9248	11.8214	12.2351	12.2389
13	2.7412	2.85644	3.0233	3.18371	3.06636	3.22283	3.35391	3.32309	3.40108	3.37968	3.40045	3.52454	3.58287	3.76668	3.86908	4.02894	4.20788	4.28987	4.09457	4.2511	4.00318	4.15177	4.23006	4.28978	4.2352	4.32128	4.55376	4.80263	4.91661	4.92409	5.32614	7.32913	7.03777	6.76262	8.51382	9.16992	7.91564	9.23942	9.4857	11.2029	11.4464	11.8098	11.7594	12.0451	12.6569	12.8544	12.1179	12.5423	12.3506
14	2.70993	2.87826	2.88092	3.09445	3.22526	3.35629	3.35629	3.37918	3.39201	3.37968	3.46353	3.59971	3.63921	3.70834	3.90026	4.10033	4.13301	4.24525	4.49585	4.50633	4.44524	4.39608	4.40155	4.27313	4.4496	4.54658	4.74468	4.88053	4.92847	5.08121	5.43108	6.65301	7.74352	9.69842	8.39358	10.1588	9.70422	9.72046	8.80988	9.96225	10.2167	11.5472	11.9399	12.301	12.8403	12.993	12.6379	12.8913	12.8571
15	2.71802	2.88001	3.0286	3.04754	3.20356	3.287	3.40407	3.5791	3.38286	3.49357	3.46428	3.59601	3.76505	3.76614	3.88225	4.1714	4.27124	4.28851	4.31306	4.51636	4.62537	4.61288	4.83425	4.54884	4.57436	4.7349	4.83493	4.88774	4.99889	5.43248	5.60582	7.11764	7.90367	9.00329	10.1464	10.8992	10.6954	11.303	10.2088	10.6024	9.73872	10.6316	12.181	12.2724	12.8931	13.1631	13.0621	12.496	13.3127
16	2.80544	2.88325	2.97417	3.07903	3.20413	3.29171	3.44948	3.58203	3.49945	3.6758	3.66129	3.68476	3.76696	3.85936	3.88741	4.00835	4.28851	4.30259	4.31997	4.54969	4.68169	4.69921	4.89526	4.92773	5.02216	4.85368	4.88713	4.96682	5.01254	6.42643	5.92237	6.44953	8.47448	9.60547	10.1721	10.9401	10.7608	11.3078	11.2674	12.143	10.8717	10.5357	12.1834	12.4894	13.0629	13.2588	13.198	13.0003	13.2027
17	2.77758	2.80544	3.06145	3.20299	3.20299	3.35457	3.44754	3.63298	3.67902	3.67647	3.72126	3.76621	3.78478	3.9628	3.96392	4.12231	4.22003	4.3652	4.66559	4.51191	4.55161	4.71741	4.81171	4.97242	5.2583	5.09693	5.14689	5.13394	5.13363	6.39961	7.01677	7.37008	8.17272	11.3613	11.4856	12.1646	11.9139	11.9122	12.2309	12.2899	12.3627	11.7729	12.5909	12.3393	12.9997	13.1925	13.352	13.2754	13.7349
18	2.73266	2.80544	2.80544	3.20356	3.25112	3.44609	3.49233	3.6548	3.76439	3.69167	3.76318	3.75726	3.86049	4.09299	3.98478	3.99326	4.26189	4.55521	4.65694	4.71899	4.83177	4.85023	4.91901	4.9564	5.21677	5.40832	5.47548	5.38247	5.68866	7.47657	8.10689	7.40332	10.5178	11.3329	12.4445	13.1846	12.8897	13.0143	12.5608	12.4491	12.9875	12.7759	13.3874	13.2742	13.2883	13.4092	13.5214	13.4926	13.8402
19	2.70979	2.77831	2.80544	3.09555	3.33689	3.44609	3.56894	3.69263	3.87871	3.82706	3.81386	3.69952	3.83375	3.96504	4.10728	4.13833	4.25345	4.26413	4.68933	4.93994	5.06895	5.02798	5.00215	5.06892	5.20097	5.39198	5.46717	5.60846	6.03506	7.05934	8.69472	9.44227	9.14952	11.1121	12.1404	13.1452	13.0131	13.2022	12.9091	13.0864	12.8564	13.1285	14.1852	13.8841	14.0598	13.809	13.6204	13.6755	13.6227
20	2.77775	2.80059	2.83734	2.93946	3.11936	3.4447	3.53984	3.76559	3.85936	3.95111	3.96822	3.91336	3.85936	3.89867	4.08345	4.20624	4.25279	4.28611	4.72199	4.95205	5.06793	5.18031	5.2094	5.25965	5.34033	5.41513	5.46316	5.85875	5.82927	6.92211	8.47302	9.22562	11.3028	11.2548	11.8356	12.3008	13.3788	13.1532	12.9606	13.5119	13.0896	13.6208	14.0282	14.5232	14.5806	14.3775	14.0694	13.9685	13.7554
21	2.87124	2.9636	3.10794	3.06558	3.03848	3.29508	3.44747	3.74531	3.92416	4.15672	4.12979	4.02423	4.12878	4.03077	4.16579	4.24764	4.26206	4.26888	4.65438	5.03426	5.267	5.30557	5.31006	5.40023	5.68541	5.64788	5.6979	5.96137	6.20762	6.1605	7.15904	9.31881	9.71511	12.0065	12.572	13.43	13.3605	13.3561	13.4965	13.7523	13.9582	14.1189	14.3648	14.8054	14.7098	14.5715	14.3271	14.1989	14.324
22	3.22784	3.09077	3.09335	3.11865	3.17481	3.30982	3.46253	3.66528	3.7847	4.18301	4.44031	4.41674	4.12777	4.236	4.36557	4.33572	4.30234	4.33664	4.52364	5.01119	5.35263	5.35638	5.36042	5.53184	5.77028	6.03721	5.95403	6.39983	6.29576	6.57992	7.15595	8.28236	8.21801	11.8947	12.3837	12.839	13.7947	13.6728	13.5948	13.3218	14.0307	14.0211	14.599	14.8087	15.1354	15.1207	14.4788	14.5686	14.5838
23	3.4014	3.40045	3.08151	3.28485	3.29874	3.30017	3.40092	3.62428	3.83196	4.09559	4.36549	4.50513	4.66358	4.55694	4.61628	4.6795	4.70549	4.54753	4.51311	4.62767	5.26487	5.513	5.69812	5.56693	5.81522	6.39275	6.20468	6.41162	6.76087	7.07006	7.19596	8.0938	8.62797	10.1772	11.1308	12.4472	13.2632	13.5148	14.1174	13.6013	13.7003	14.3304	14.8574	15.6278	15.3369	15.1885	15.1257	14.7924	14.8171
24	3.40045	3.47273	3.50715	3.40515	3.40515	3.37931	3.44609	3.69316	3.84051	3.99989	4.35466	4.51623	4.71352	4.68556	4.90073	4.90073	4.83492	4.80048	4.77868	4.85254	4.94035	5.35869	5.6087	5.90987	6.26937	6.46246	6.35479	6.5117	7.1389	7.72628	7.93347	8.43817	8.30047	9.69601	11.226	11.4045	12.8804	14.2593	14.1414	13.6932	14.1826	14.1364	14.9319	15.8923	16.4159	16.3379	16.0931	15.4616	15.4389
25	3.43993	3.42482	3.70336	3.70594	3.68276	3.7047	3.5924	3.55403	3.79482	3.92783	4.18362	4.41105	4.83894	4.90073	4.91518	4.9925	5.00003	5.08145	4.91661	5.13667	5.21933	5.30677	5.4167	5.6117	5.75648	6.78309	7.49751	6.83212	7.54159	8.06834	9.19409	9.00792	9.93177	10.0396	12.0054	11.9965	13.9646	13.5445	14.7065	14.5278	14.6235	14.9471	15.2098	15.9292	16.3203	16.7208	16.4245	15.6361	15.994
26	3.44609	3.58269	3.76559	3.85604	3.76738	3.86	3.85936	3.86446	3.81756	4.09621	4.09615	4.25357	4.52289	4.84258	5.0405	5.03237	5.22275	5.4167	5.15848	4.96948	5.24428	5.49096	5.62026	5.77773	5.68607	6.06395	6.57681	7.04463	8.1241	9.31297	9.3214	11.3554	10.8622	11.2747	12.9882	13.836	14.1949	13.8737	13.9423	14.2198	15.5919	15.5501	15.3033	15.9721	16.6887	16.8922	16.8309	16.6247	16.8217
27	3.38556	3.59362	3.80331	3.85936	3.9939	3.8606	3.85986	4.0014	3.96633	4.00777	4.19088	4.26488	4.62425	4.85643	4.90569	4.99263	5.29256	5.41483	5.42473	5.42773	5.4167	5.42389	5.53085	5.6934	6.06815	6.38562	6.55188	6.68781	7.27921	10.6937	10.4707	11.9918	11.6275	13.4329	14.266	14.1527	15.1855	15.6242	14.5804	15.2052	14.8489	15.5271	15.5994	15.7404	16.4717	16.9311	17.0081	17.2561	17.4269
28	3.35574	3.72414	3.68255	3.83871	4.11647	4.38261	4.30084	4.3663	4.35684	4.40096	4.32694	4.62191	4.71011	4.8442	4.93801	5.01186	5.10149	5.27851	5.45106	5.42879	5.51048	5.50453	5.662	5.98054	6.25573	6.2411	6.71242	6.91262	7.06078	8.26306	10.2913	12.6758	13.5368	13.4988	13.3808	15.0917	15.493	15.5424	15.9225	15.6636	15.5498	15.62	15.7954	16.3523	16.9742	17.5021	17.1251	17.5522	17.5761
29	3.40325	3.51156	3.72888	3.83622	3.95386	4.15134	4.62216	4.64337	4.6224	4.62379	4.72113	4.609	4.72113	4.7224	5.01186	5.01186	5.03562	5.31987	5.47451	5.51315	5.58834	5.92683	6.08971	6.30267	6.34051	6.44569	6.91031	7.19413	7.35389	8.00809	10.3002	10.539	12.4342	14.8839	14.8456	14.701	14.8292	15.7967	16.748	16.2941	16.6132	16.8057	16.0396	16.6872	17.5264	17.7416	17.8511	17.9216	18.0793
30	3.44609	3.59828	3.76669	3.77225	4.07477	4.19834	4.60343	4.76677	4.88004	4.90493	4.7938	4.72178	4.72146	4.86411	5.01186	5.09078	5.11339	5.3733	5.52745	5.7989	5.70001	5.88322	6.11975	6.45983	6.6231	6.62837	6.79149	7.30336	7.83569	8.46887	10.1947	11.133	11.854	12.9206	14.1738	16.1097	16.0889	16.8157	17.3286	17.8663	17.953	18.1178	17.4914	17.8905	17.7576	17.9029	18.1247	18.462	19.0845
31	3.44824	3.72888	3.72888	3.83406	4.15019	4.27966	4.62191	4.78397	5.11392	5.25314	5.11275	5.01266	5.05094	5.01186	5.01186	5.10133	5.15932	5.40718	5.58743	6.00628	5.95646	5.90735	6.40379	6.62405	6.78521	6.84884	7.11861	7.35333	7.79479	8.8415	10.2385	11.1502	11.4103	11.9155	12.5866	15.3645	17.161	17.5366	18.2287	18.612	18.7738	18.2168	18.5197	18.9089	18.4734	18.3952	18.4289	18.6622	18.7115
32	3.44657	3.57411	3.58907	3.7308	4.06132	4.1326	4.44505	4.90612	5.09317	5.33282	5.36065	5.36019	5.42804	5.26992	5.36179	5.10681	5.37034	5.37356	5.75494	6.19616	6.39174	6.65695	6.71053	6.85577	7.0817	7.30409	7.24263	7.46742	7.63889	8.69832	10.0364	11.4104	11.3282	12.6696	12.7829	13.8963	16.3668	18.0562	18.5327	18.9299	19.4667	18.9718	19.0377	19.1625	19.1734	18.6653	18.8873	18.7935	19.0871
33	3.49321	3.54125	3.72752	3.81845	4.06168	4.09897	4.28082	4.81284	5.28733	5.46054	5.40747	5.43605	5.4919	5.55516	5.81717	5.82675	5.53894	5.54747	5.73808	6.18799	6.33569	6.61232	6.74355	6.94379	7.08387	7.26718	8.0988	7.72158	8.90092	9.45534	10.9365	12.8731	12.8999	12.492	14.2369	14.8757	16.5308	17.5869	18.5797	19.7669	19.9164	19.5714	19.7104	19.8914	19.8225	19.6685	19.5557	19.8632	19.0245
34	3.52448	3.52553	3.60153	3.78649	3.92006	4.23695	4.26132	4.50266	5.08963	5.37452	5.45405	5.43605	5.67169	5.67169	5.91589	5.99711	6.22489	6.0019	5.95218	6.43317	6.54304	6.54214	6.80089	7.35205	7.20653	8.17582	9.18518	9.2611	8.91116	10.7828	12.537	14.2454	15.0513	14.5046	14.7518	15.0344	17.0262	18.3064	18.5106	19.4021	19.9295	19.8005	20.1769	20.6036	20.8404	20.7609	20.8289	20.1838	20.1082
35	3.55844	3.63826	3.766	3.80455	3.87023	4.06983	4.25425	4.38451	4.8277	5.30639	5.52741	5.37452	5.60912	5.64635	5.79084	6.22489	6.42719	6.68714	6.62191	6.73535	6.80513	6.80089	6.93353	7.16406	7.24478	8.05136	11.3629	11.5496	9.88337	12.0605	13.668	15.2793	15.1518	17.1176	16.3874	16.8035	17.744	18.2941	19.235	19.6885	20.3225	19.701	20.7892	21.2578	20.7551	20.7985	21.5028	21.2298	20.3296
36	3.7063	3.76736	3.76559	3.79118	4.03367	4.09672	4.2647	4.2647	4.36095	5.04619	5.36218	5.44516	5.6963	5.68522	5.83121	6.1116	6.54442	6.73964	6.82126	6.75663	7.08402	7.05669	7.35428	7.34356	7.85701	7.58169	8.44296	11.4958	12.2584	13.3308	15.1179	15.9809	17.3874	17.9101	17.5128	18.068	19.4202	19.1177	19.7784	20.3211	20.1166	20.4741	20.4924	20.6914	21.3933	20.9167	21.2231	21.0659	22.1582
37	3.58997	3.79993	3.72888	4.24474	4.16847	4.09502	4.20867	4.43877	4.49604	4.85561	5.24094	5.30557	5.4904	5.88298	5.92494	6.00454	6.38016	6.69146	7.08278	7.06941	7.08937	7.13637	7.3607	7.33244	7.73451	9.67753	10.2468	13.5331	12.2329	12.7464	14.4806	16.7558	17.5997	17.7162	18.3548	17.7988	18.4955	18.7571	20.4597	20.6303	20.9741	20.8931	20.9914	21.1378	21.1242	21.5466	21.6161	21.1867	22.4282
38	3.59829	3.84564	3.92273	4.17469	4.43636	4.43783	4.39159	4.60429	4.79605	5.04807	5.11269	5.28921	5.36132	5.63312	5.88298	6.1673	6.41852	6.48595	6.9567	7.04947	7.45983	7.3314	7.52328	7.64157	8.12709	8.44331	10.3425	11.3681	14.1963	14.3631	15.2592	17.0072	17.8491	18.231	18.0082	18.5404	19.1549	19.2534	19.5116	20.1616	20.6533	21.0085	21.6633	21.4748	21.8442	21.7084	21.9058	21.6033	22.1805
39	3.64282	3.86757	3.8906	4.12962	4.46464	4.60502	4.52381	4.59201	4.52813	4.66429	5.19841	5.43193	5.4588	5.59332	5.88351	6.31112	6.59935	6.7926	7.07152	7.38249	7.35693	7.50824	7.47364	7.75893	8.70751	10.0145	9.63762	10.8192	13.3416	14.0122	14.8681	16.7018	17.9414	17.5789	18.6631	19.1613	19.7296	20.3305	20.2012	20.8086	20.9543	21.2754	21.9105	22.3725	23.1156	22.9368	22.0824	21.9684	21.7071
40	3.44657	3.58113	4.00071	4.19057	4.43636	4.88477	5.01507	4.99831	5.07821	5.04448	5.17004	5.41671	5.56231	5.65828	5.88356	6.34166	6.75937	6.89571	6.99212	7.34356	7.66279	7.82293	7.95835	8.0084	8.4668	9.3583	11.674	12.1986	12.4543	13.0519	13.6177	14.9656	16.5775	16.6354	18.4353	19.9077	20.4395	20.7983	20.7501	21.583	21.812	21.6017	21.8463	22.9109	23.0392	24.2808	23.7159	22.5142	21.6782
41	3.47382	3.47382	3.68565	4.22438	4.45602	4.81201	4.87595	5.04417	5.18388	5.41805	5.42	5.59564	5.84823	5.74658	5.98378	6.33268	6.77879	6.98038	7.09586	7.38932	7.53477	7.82948	8.41887	8.45408	8.57768	9.38551	10.0039	11.7044	14.0536	13.9703	14.3643	14.4397	16.5093	17.1844	18.1934	19.8606	20.5459	21.4157	20.837	21.3406	22.4574	22.962	23.0333	23.7495	23.2931	24.1786	23.7435	23.0037	22.3868
42	3.48958	3.51934	3.58473	3.91609	4.17476	4.71762	4.98822	5.10088	5.14696	5.32446	5.53625	5.72431	5.98657	6.12868	6.35369	6.55024	6.86478	7.05047	7.33984	7.35098	7.84968	7.96705	8.26767	8.46824	8.57802	9.08149	9.72694	10.5223	12.4976	14.7925	15.1791	14.6341	17.2807	18.0984	18.7575	19.7243	20.1724	21.3237	21.9694	22.4762	23.3123	23.2528	23.1549	24.2378	23.8445	24.1073	23.8717	23.2358	23.5742
43	3.47384	3.59484	3.63179	3.67841	3.90301	4.57176	4.72312	4.87866	5.1804	5.40713	5.56307	5.6883	5.98377	6.23932	6.55108	6.92982	6.99618	6.9082	7.14035	7.34262	7.67579	7.82794	8.21901	8.29947	8.60586	9.41179	9.8034	10.7844	12.4753	15.0404	16.2419	16.647	18.0773	19.4079	18.4095	19.7874	20.4074	20.7148	21.8537	22.5778	23.2918	23.3098	22.8954	23.5067	24.1679	24.257	24.1263	24.1848	24.4374
44	3.79211	3.72888	3.70306	3.76559	3.91532	4.26455	4.72113	4.89346	5.16561	5.25201	5.40713	5.73	5.90546	5.98653	6.24773	6.78513	7.17801	7.23452	7.3511	7.35159	7.3633	7.72101	8.12379	8.25089	8.95578	9.38272	11.8498	10.7931	12.928	15.5391	15.8039	16.4949	19.1723	19.7814	19.5426	19.6615	20.2915	21.0206	21.8491	22.6485	22.6388	23.1516	23.3674	24.3825	24.0543	24.3216	23.8921	24.2424	24.7502
45	3.72888	3.73493	3.95101	4.0574	4.13631	4.15323	4.5182	4.7952	5.17626	5.27064	5.31511	5.53379	5.55489	5.82189	6.00878	6.50076	6.65786	7.22803	7.28344	7.38632	7.45861	7.75791	7.84451	8.3806	9.16399	9.67511	10.5678	12.3561	14.1919	15.2644	18.0709	18.3423	19.3099	20.4921	20.0915	20.0725	21.9924	21.7545	22.0813	23.3635	23.2594	23.593	23.9494	23.8748	24.2757	24.4587	23.4003	24.2677	24.4559
46	3.60387	3.72888	3.88218	4.15009	4.24266	4.61183	4.58975	4.6788	4.86336	5.12487	5.42358	5.53184	5.77724	5.96531	6.30148	6.28993	6.70499	7.26605	7.31727	7.5299	7.79807	8.00492	8.29175	8.59641	9.03608	9.78367	10.7136	13.49	13.8134	12.6792	15.5337	17.9136	20.0292	20.7901	20.4846	20.618	22.1492	22.6314	23.0786	23.9845	24.7341	24.8072	25.2742	24.3233	24.5984	25.226	23.9619	24.1535	24.3016
47	3.72888	3.85429	4.15009	4.24202	4.25461	4.67847	4.67847	4.79746	5.08036	5.16445	5.27444	5.21577	5.53184	5.8748	6.07048	6.48635	6.76658	7.15691	7.60368	7.9023	7.98527	8.27878	8.41332	9.46832	11.0299	10.4673	11.8061	13.3472	13.2865	13.0899	14.1926	16.5956	19.4038	20.1904	20.7387	22.0271	22.2486	22.8532	23.4551	23.8046	24.1691	25.3487	25.7865	26.0415	26.1953	25.5731	24.4676	24.28	24.5127
48	3.72888	3.73063	3.89856	4.2159	4.49919	4.47842	4.67847	4.91158	5.21577	5.42596	5.57467	5.90081	5.75885	5.98377	6.2374	6.25642	6.47979	7.0868	7.51772	7.79761	8.28344	8.39457	8.48276	8.7589	11.0899	11.6981	13.2777	13.7765	14.4138	14.9405	15.5714	17.2244	19.2407	20.5785	21.1382	22.0875	22.6792	22.455	23.2699	23.394	24.2329	25.1537	26.3643	26.3163	26.7198	26.27	25.6364	24.8088	23.6037
49	3.72888	3.86041	3.86196	4.17185	4.57736	4.86524	5.00414	4.98276	5.35354	5.55183	6.03114	5.82343	6.10553	6.14865	6.22489	6.59073	6.7922	6.92903	7.20516	7.71732	7.94924	8.22208	8.46589	8.65189	9.42584	10.1567	11.5035	13.9189	16.3267	17.1917	17.9311	18.8688	20.4374	21.7252	21.9822	22.6585	23.2723	22.9786	22.9211	24.566	24.7605	25.315	25.498	26.1625	26.1926	25.9141	24.778	24.4746	23.8944
50	3.72888	3.82252	3.83629	3.94184	4.15009	4.7325	4.70425	4.93685	5.32316	5.70613	5.93638	6.14239	6.24312	6.43999	6.43277	6.58563	6.94583	7.12455	7.46774	7.60874	7.91755	8.50891	8.61737	9.15218	9.98868	11.2936	12.594	14.3296	16.1299	18.8292	19.5258	20.7274	22.0933	22.8106	22.8791	23.2112	23.5613	24.0533	23.8482	24.9941	25.4313	25.0989	25.5107	26.245	25.8454	25.7556	25.093	24.409	22.8473
51	3.79528	3.86117	4.09578	4.25191	4.38926	4.51803	4.83659	4.88191	5.343	5.59412	5.65647	6.11127	6.27622	6.29134	6.56973	6.9571	7.08178	7.09048	7.46915	8.01202	8.30194	8.30168	8.45096	10.255	11.6114	13.1935	14.8847	15.817	18.1534	19.1218	20.8914	21.3119	22.2096	23.2881	23.7751	24.7477	24.4491	25.1828	24.6875	24.929	25.2306	25.4804	26.1554	26.1608	25.9005	25.3164	24.7452	24.6575	22.6617
52	3.79903	4.09033	4.2675	4.29606	4.38951	4.67325	4.9733	5.06626	5.32376	5.32202	5.72912	6.02767	6.26885	6.32893	6.71292	6.86846	7.29335	7.37622	7.51081	7.95786	8.30018	8.33853	8.57231	9.21798	9.52577	12.2824	16.2838	18.0319	19.4423	20.2743	21.6346	21.9595	22.8027	24.1336	24.9067	24.4386	24.5382	25.2398	26.1377	26.5716	26.3785	25.8846	25.8281	26.4297	26.012	24.92	25.1859	24.1795	22.0571
53	3.99927	3.99927	4.28611	4.24138	4.6492	4.87851	4.99459	5.12295	5.40182	5.58015	5.7132	5.9589	6.25615	6.40842	6.77777	7.00658	7.21969	7.57253	7.98801	7.93634	8.35865	8.42124	8.90407	9.32794	10.0426	11.4295	15.3627	17.3815	19.1277	20.1735	22.1123	22.9784	23.115	23.6003	24.7624	26.0369	26.4355	25.93	26.3427	27.1186	26.4637	26.3661	26.5875	26.782	24.4326	24.0542	24.8173	23.5387	21.9519
54	3.87788	3.99989	4.10129	4.32921	4.62503	5.03791	5.18751	5.24701	5.26236	5.59281	5.77726	6.13009	6.38807	6.54206	6.51521	7.05143	7.33083	7.71873	7.72847	7.99801	8.46899	8.57313	8.80481	9.11358	9.92428	10.7077	14.3983	16.7239	18.5543	20.0426	21.0383	22.271	23.2738	24.5051	25.753	26.0425	25.8496	26.0087	26.6106	27.3776	26.5699	26.3045	25.8876	26.1773	25.7072	24.7224	24.2017	22.7223	21.4
55	3.87028	3.99927	4.11483	4.3206	4.79583	5.088	5.25605	5.53499	5.71088	5.80088	5.86967	6.02044	6.31753	6.69374	6.88231	7.04527	7.57189	7.59387	7.82395	7.91121	8.56833	8.93746	8.80169	9.34316	10.8374	13.3198	15.6606	15.9756	16.6611	18.1697	19.7162	21.2362	22.5986	23.3353	24.462	24.6615	25.9855	26.545	26.5785	26.7479	26.6118	26.2873	26.2242	27.3789	25.8939	24.6393	23.3227	22.8187	22.2155
56	3.69948	3.92604	4.26539	4.19657	4.23664	4.74479	5.19672	5.53445	5.79422	6.00647	6.08697	6.2363	6.43739	6.48596	6.67065	7.09352	7.30588	7.6406	7.72042	7.78916	8.21573	8.57994	8.97814	9.26509	9.62395	10.7318	12.5394	14.6434	17.9282	19.0088	20.8067	20.0591	22.1211	23.1306	24.4189	25.3795	25.5301	25.373	26.2414	27.0725	26.6175	27.0502	26.6442	26.6282	25.516	25.4747	23.4255	22.5389	21.3582
57	3.77155	3.68683	3.89821	4.17765	4.57517	4.76291	4.98061	5.22418	5.51666	5.91547	6.05892	6.14	6.2286	6.29545	6.5666	7.13747	7.40981	7.60289	7.7439	8.06041	8.08031	8.65068	8.97866	9.51417	9.66496	9.99979	11.253	12.8426	14.4666	16.245	19.2221	20.7941	21.5201	23.3426	23.737	24.1988	25.3652	25.732	26.6702	26.4377	27.201	27.5438	27.1123	27.1927	26.0302	25.6616	23.2997	21.7776	20.6959
58	3.80576	3.90775	4.10105	4.25167	4.37057	4.62455	4.85295	5.12395	5.45867	5.87101	5.95223	6.0797	5.97054	6.37854	7.0332	6.9537	7.42204	7.68596	7.72048	8.38959	8.3888	8.65243	8.94532	9.28309	9.93818	10.7397	11.5998	11.8441	12.9509	15.3565	17.016	18.5951	20.7839	22.0661	23.2616	24.9771	26.4993	26.8059	27.0059	26.7194	26.1354	27.5457	26.7442	27.0485	26.2466	25.2058	24.203	22.3586	21.4382
59	3.64107	3.64107	3.78894	4.15009	4.50861	4.75273	4.85459	5.00898	5.05495	5.5342	5.87489	5.8927	6.07064	6.36149	6.54016	7.1764	7.43824	7.73806	7.85681	8.32667	8.70243	8.98145	9.19462	9.43236	9.78019	11.7178	13.679	13.1261	15.4586	15.9402	17.234	19.9874	20.7855	22.0979	23.0703	24.9302	25.1514	26.2711	28.3018	27.8162	27.8196	27.7447	27.2487	26.6953	25.4409	24.729	23.5654	22.0805	20.5815
60	3.66629	3.77155	4.01743	4.15157	4.48795	4.85518	4.85459	5.05255	5.35497	5.61551	5.89081	5.89732	6.02424	6.53811	6.84024	7.31182	7.62977	7.76534	8.09007	8.39784	8.57785	8.97659	9.21025	9.79528	10.2398	10.5188	12.3822	12.9409	12.2304	15.2881	17.942	20.1278	21.2142	22.0226	23.4899	24.8375	25.6971	26.8102	28.4038	28.2671	28.0713	28.2044	29.3153	27.2851	25.9467	25.6487	23.7015	21.9441	20.7479
61	3.70217	3.7342	3.80629	3.96998	4.20492	4.26619	4.64194	5.02873	5.44869	5.68654	5.96013	5.88813	6.32578	6.46171	6.851	6.9483	7.65695	7.94008	8.22649	8.47664	8.92823	8.99062	9.14031	9.70397	9.85819	10.8261	12.1031	12.2832	12.5777	15.7906	16.7232	19.3385	21.0679	22.1769	23.4874	24.987	26.4476	27.2319	27.4457	27.472	27.5151	27.8793	27.8648	27.7025	26.5326	25.8903	24.3054	22.116	21.37
62	3.61298	3.36174	3.46147	3.65394	3.96392	4.26485	4.29548	4.54863	5.16466	5.47547	5.7044	5.93981	6.18575	6.52538	6.53171	6.851	7.32867	7.68133	7.7012	8.31606	8.80425	8.98602	9.22962	9.81657	10.0383	10.494	12.6615	12.8652	13.9315	15.1942	16.4999	18.7039	21.0226	21.7315	23.1238	26.1599	26.7496	28.1324	26.709	27.2908	27.9086	28.9783	28.1092	27.2456	26.9311	25.9587	24.2855	22.8566	21.7076
63	3.77355	3.67093	3.79373	3.87276	4.01806	4.2201	4.17414	4.31187	4.81562	5.1403	5.43902	5.61557	6.12616	6.12875	6.40598	6.44187	7.07619	7.42204	7.77011	8.33961	8.78789	9.11032	9.42413	9.52958	9.82374	10.0597	10.9624	12.8091	13.3729	15.4168	18.873	20.3813	21.0829	21.9761	22.8643	23.5771	25.9393	26.8422	27.8856	27.5405	27.878	28.591	29.1255	28.4558	27.2959	26.0322	25.155	23.1313	21.4993
64	3.63205	3.86224	3.9037	4.04132	3.99927	4.2647	4.26584	4.44703	4.81187	4.99726	5.07834	5.21911	5.52074	5.969	6.11267	6.12699	6.69254	7.22114	7.50963	8.01087	8.68216	9.00429	9.09312	9.37191	9.86718	10.2419	11.2452	12.6828	13.3995	15.5642	17.1307	19.7192	20.6031	22.5179	23.5853	24.4864	25.1067	26.5383	27.793	28.1604	28.5546	29.1897	28.5027	28.4654	27.6464	25.4976	23.9845	23.8915	22.8296
65	3.37837	3.57343	3.77155	3.87276	4.00073	4.21961	4.48795	4.53183	4.49033	4.7223	5.10002	5.42118	5.50844	5.92761	5.9932	6.04881	6.21289	6.80196	7.11817	7.7392	8.13397	8.63739	9.21868	9.57401	10.0032	10.5916	11.7445	13.5494	14.9296	16.1818	17.9375	19.4459	20.537	22.8581	23.5049	24.4492	26.2046	27.2525	27.5659	28.4397	28.9095	28.8008	28.0324	27.7759	27.2842	26.4105	24.7324	24.2231	22.9858
66	3.44932	3.65843	3.75118	3.88991	4.16332	4.39967	4.53744	4.5713	4.80037	4.90519	5.03467	5.55294	5.82914	6.39142	6.16626	6.2367	6.34851	6.78845	7.27993	7.97295	8.38998	8.53057	9.06604	9.43298	10.0902	10.5779	11.2455	11.2205	11.6437	14.687	17.3846	19.7565	20.6377	22.2493	23.2844	24.652	25.9278	26.6182	28.0238	28.935	28.5565	28.0402	28.7285	28.1014	27.1188	26.686	25.7006	23.9708	23.6278
67	2.71452	2.99164	3.14274	3.42424	3.8539	3.97652	4.21856	4.4012	4.83549	5.08844	5.417	5.49229	5.6416	5.78736	6.60932	6.71209	6.72687	6.92294	7.03106	7.45492	7.95981	8.52939	8.74125	9.3317	9.86473	10.5733	10.538	11.0641	12.2086	13.4268	15.2971	17.197	17.8455	21.1088	22.6423	24.0649	24.0011	25.3111	25.9417	28.3212	28.8599	29.2934	29.4531	28.6447	27.4401	27.2399	25.8429	24.2923	23.964
68	2.87826	3.18846	2.99289	3.13411	3.2072	3.46147	3.70314	4.01501	4.37392	4.79859	5.401	5.80368	5.98972	6.12784	6.54524	6.81261	6.86868	7.46267	7.74086	7.97069	8.12505	8.70999	9.13625	9.48433	10.0179	10.8703	10.9485	11.2458	12.5532	13.8424	15.2427	18.2697	20.2281	20.3219	21.2163	22.1317	23.1758	24.7618	25.9603	28.0422	28.8576	28.5089	28.577	28.5951	27.5851	27.2623	25.5887	25.1485	24.1969
69	3.03353	3.0031	2.99289	3.02351	3.38882	3.32025	3.62799	3.93091	3.99988	4.45622	5.03101	5.83057	5.9102	6.01774	6.34495	6.8057	7.02505	7.37111	7.75786	8.27736	8.19148	8.44259	9.02447	9.35597	9.96657	10.3904	10.3982	10.9738	11.8107	12.8078	15.9155	18.8149	19.7142	21.3274	22.1555	23.5434	24.0015	24.8248	26.9491	26.6389	28.0185	29.5544	28.9329	29.0154	28.3962	27.1287	25.192	25.5021	24.7849
70	3.2285	2.95954	3.24764	3.47047	3.46147	3.70073	3.87978	4.1516	4.22774	4.45605	4.60784	5.02974	5.59887	5.93515	6.54069	7.03193	7.34951	7.49644	7.84903	8.16387	8.47662	8.7697	8.99561	9.36722	9.39581	9.92398	9.85151	10.5842	12.0203	13.202	14.5963	17.3659	19.0645	20.1291	21.223	23.1922	24.1099	25.3651	26.4863	27.0201	27.7457	29.1052	29.7181	29.1783	28.3532	27.1857	26.0322	26.2161	25.0881
71	3.24428	3.42733	3.62442	3.65928	3.54466	3.66847	3.84175	3.97792	4.12606	4.36095	4.6224	4.79456	5.19431	5.75725	6.02002	6.43746	6.65914	6.91489	7.48183	8.12585	8.63001	8.87416	8.87394	8.87689	9.32115	9.7031	10.1062	10.5862	11.5217	13.0982	14.5295	18.4368	19.9514	21.044	21.1286	22.831	23.1427	24.6172	25.1356	26.5263	28.1065	29.6283	30.0333	29.6034	28.5614	27.4596	27.0091	25.9716	25.6132
72	3.42733	3.58496	3.6237	3.61743	3.73704	3.76893	3.96842	4.23831	4.28995	4.43755	4.62431	4.79456	4.7956	5.41318	5.92878	6.49528	6.94497	7.24741	7.35167	7.77722	8.41656	8.78024	8.91398	9.10788	9.59489	9.60162	10.1076	10.4472	10.9177	11.6683	13.2742	16.7151	18.6267	20.4652	21.8714	23.4008	23.4961	25.6135	26.2241	27.7806	29.3904	29.4319	30.2934	29.3934	28.5447	28.3228	27.4423	27.4138	27.0081
73	3.07968	3.62621	3.60635	3.69702	3.73704	3.84956	4.25777	4.25852	4.36095	4.36095	4.72066	4.86155	5.10442	5.69741	6.2649	6.33731	6.9282	7.21417	7.35159	7.59274	8.38064	8.71041	8.86174	9.02596	9.15469	9.41038	9.85768	10.4917	10.7969	12.0274	13.1181	14.7239	17.9664	19.6944	22.1122	23.5782	24.0481	25.2459	26.2305	26.5108	28.8323	29.2788	29.0199	28.7636	28.0954	28.7987	28.5547	28.5858	27.7225
74	2.71886	3.14196	3.56175	3.74914	3.81405	4.07507	4.26528	4.35535	4.40918	4.36228	4.44926	4.48845	4.9125	5.36213	5.88981	6.53094	6.67213	7.06497	7.21677	7.73999	7.90815	8.09621	8.83317	8.53765	8.71312	9.19907	9.33247	9.69352	10.0328	11.0967	12.9065	14.8983	17.9619	19.9287	21.5858	23.2573	25.5126	25.3652	25.3439	26.1802	27.4643	29.0335	28.6213	28.9321	28.4767	29.5947	29.0795	29.1182	29.6114
75	2.85781	2.92973	3.16396	3.35373	3.60841	3.98705	4.35535	4.43636	4.43737	4.43758	4.43758	4.57327	5.18629	5.55185	5.74739	6.45546	6.78182	7.21622	7.21417	7.24556	7.61931	8.25478	8.34292	8.54086	8.81727	9.07296	9.15352	9.49486	9.67272	10.4484	11.438	13.7466	15.7271	17.5441	19.1361	21.7094	24.2601	24.7299	25.327	27.3002	27.6257	28.1131	28.6266	28.5459	28.7982	29.292	29.9714	29.7958	29.5157
76	2.46255	2.58235	2.86959	3.19831	3.24468	3.58131	4.14319	4.28475	4.34647	4.44387	4.4544	4.72222	5.18726	5.27022	5.57037	5.83763	6.51907	6.64838	6.82353	7.1674	7.29139	7.69811	8.07731	8.72845	8.87327	8.87972	9.63329	10.0262	10.3019	12.0623	12.8806	14.144	17.9649	17.233	19.1055	19.9045	21.6331	22.9466	24.3392	25.0307	26.0144	26.0564	27.5757	28.6261	29.704	29.2497	29.6008	29.093	29.083
77	2.51094	2.43271	2.58224	2.9135	3.12837	3.46274	3.92215	3.99239	4.11511	4.25429	4.25959	4.45515	4.59462	4.92948	5.379	5.73918	6.3266	6.25187	6.57459	6.793	6.93285	7.51819	7.9859	8.11061	8.01217	8.98948	9.36009	9.73683	9.82599	11.0695	12.6751	14.6148	17.1517	18.2027	19.4472	19.3616	20.605	22.3902	22.7589	24.7001	24.9187	24.9831	26.3482	28.536	29.3112	29.1232	28.6251	28.9831	28.6127
78	2.28247	2.32353	2.60739	2.73866	2.93199	3.15263	3.40045	3.59652	3.74982	3.93454	4.31997	4.36095	4.59462	4.93676	5.05134	5.37975	5.78027	6.10434	6.51229	6.68762	7.30572	7.33296	7.7123	8.07002	7.88325	8.4221	8.65698	9.17934	9.34938	10.7962	11.7935	13.1402	15.2095	17.785	19.2747	19.28	20.6903	22.3869	22.9994	24.3815	24.6872	24.9783	25.149	28.2629	28.8248	29.4338	29.254	28.676	29.542
79	2.29763	2.2152	2.49646	2.9921	3.16179	3.492	3.46142	3.66041	3.80231	3.84051	4.32107	4.51616	4.81719	5.0065	4.94884	5.46379	5.87482	6.03702	6.09238	6.5687	6.91193	7.13451	7.53669	7.84779	8.16594	8.27634	8.67647	8.97847	9.36392	10.6471	12.0366	13.486	15.2106	16.0647	17.6266	18.9548	20.5721	21.7604	23.5877	24.6561	25.9373	26.7128	27.4923	28.8284	29.1462	29.8983	29.2868	28.9961	29.9562
80	1.68698	1.79069	2.3097	2.9602	3.12801	3.28265	3.40045	3.46291	3.65967	3.79029	3.87276	4.20164	4.48558	4.65809	4.85692	5.0451	5.44961	5.74321	6.17781	6.0915	6.36988	6.42552	6.98864	7.52647	7.93726	8.4161	8.78561	9.08109	9.52064	10.3402	11.0123	12.2062	13.5269	15.1075	15.3337	16.8025	18.7552	20.6294	21.7886	23.9991	24.8165	26.3238	26.2791	26.5465	28.7029	30.2573	29.2224	28.678	29.129
81	2.14357	2.15021	2.49128	2.73464	3.13118	3.45046	3.38385	3.39411	3.49673	3.69216	3.74724	3.97666	4.51425	4.57334	4.87941	5.03323	5.0451	5.60611	5.83039	5.97297	6.20862	6.39774	6.62407	7.38589	7.78081	8.41974	8.97874	9.20957	9.73318	10.3392	11	11.7162	14.0134	14.993	15.9006	16.5116	18.7646	19.9967	21.2572	22.7124	24.2413	24.3852	25.8735	26.227	27.491	28.1639	28.5638	28.9843	28.7005
82	1.29167	1.47253	1.85401	2.28545	2.68057	2.80462	2.95073	3.11766	3.49273	3.6237	3.70147	4.0919	4.46761	4.62656	5.07824	5.24901	5.29231	5.41769	5.67214	5.78146	6.20832	6.21431	6.4101	6.7152	7.3839	7.73831	8.38371	8.78132	9.03475	9.4833	10.3463	11.6493	13.4964	12.9661	14.1091	15.7542	18.4606	19.5217	20.2739	21.3386	22.5417	23.9299	25.0396	25.8811	27.3871	26.959	26.9629	28.0508	27.827
83	1.10357	1.51586	1.73644	1.91308	2.29741	2.49373	2.70885	3.05117	3.18257	3.56293	3.73238	3.87317	4.17402	4.85459	5.11163	5.19697	5.40502	5.61511	5.85105	6.12952	6.23062	6.27344	6.50443	6.91806	7.16081	7.32474	7.81383	8.2419	8.51668	9.01776	9.6307	9.71297	10.7936	11.3523	13.5449	15.4908	16.7336	17.9703	18.5662	20.3047	21.5315	23.0399	24.9677	25.1299	25.6761	26.0253	26.3306	27.2456	27.5926
84	2.22026	2.47985	2.6193	2.7726	2.81424	2.73713	2.82068	3.06543	3.21376	3.59462	3.80214	4.09153	4.21639	4.84148	4.92558	5.24957	5.22917	5.41769	5.60962	5.78025	6.27468	6.41003	6.45862	6.83261	7.35047	7.72244	7.59408	8.04363	8.53486	8.91468	9.36811	9.28613	9.74801	10.2909	11.0279	14.9669	14.6309	15.751	17.2289	18.8767	20.4266	21.1142	22.6985	24.9092	25.3898	25.1363	25.0704	26.1788	27.458
85	1.30382	1.50365	1.86401	2.10749	2.20027	2.66155	2.73812	2.80727	3.16126	3.50285	3.66189	3.81649	3.98041	4.44635	4.81009	5.11174	5.14487	5.41082	5.51646	5.82866	6.27939	6.50701	6.56738	6.99327	7.2069	7.60462	7.51348	7.60531	8.1696	8.43063	8.91913	9.35127	9.45175	9.76285	11.2024	14.4635	15.0127	16.5319	17.1909	17.9737	19.5529	20.264	21.6773	23.7313	24.155	24.5363	25.0287	25.038	25.9408
86	1.25104	1.33898	1.49384	1.76192	2.09479	2.34241	2.80708	2.91413	3.51081	3.6464	3.55825	3.61278	3.84104	4.17892	4.2187	4.42248	4.39509	4.62473	5.04548	5.23614	5.41767	5.61577	6.16818	6.37177	6.8008	7.05609	7.41802	7.42479	7.85907	8.08357	8.43613	8.96797	8.98064	9.51512	11.3901	12.834	14.7684	16.3471	18.2942	18.6189	19.0073	18.9466	19.7245	21.2861	22.2763	24.48	24.5004	24.9728	25.685
87	0.61303	0.904464	0.86822	1.48134	1.73644	2.21556	2.61641	2.80708	2.80943	2.86894	3.05746	3.20299	3.59218	3.85493	4.11535	4.21806	4.28892	4.56986	4.85081	5.0451	5.27543	5.41721	5.61416	5.7335	6.15318	6.62981	7.17028	7.18672	7.62467	7.97021	8.40333	8.62624	8.74508	9.36141	10.3354	12.0349	13.5549	14.181	17.1718	16.7667	16.354	18.4053	19.2276	19.5998	21.0892	22.1902	22.7642	23.6975	24.7099
88	0	0.511129	0.79099	1.56064	1.74561	2.07992	2.32335	2.42148	2.54416	2.88879	3.07139	3.10591	3.34485	3.80815	3.89989	4.12438	4.30772	4.48601	4.5509	4.87856	4.99483	5.22377	5.379	5.72602	6.19516	6.58045	7.08504	6.98853	7.26005	7.4601	7.94173	7.96318	8.43824	8.92363	10.0705	10.947	11.1083	12.4102	13.8097	14.7873	15.437	16.8753	17.9577	18.5404	19.9653	20.5639	19.9706	20.8597	21.8653
89	0.508172	0.490703	0.879627	1.46062	1.73071	1.8524	2.29343	2.53917	2.50004	2.54565	2.8634	3.40045	3.86028	3.86888	3.87871	3.87813	4.23439	4.30772	4.3304	4.61107	4.97846	5.53811	5.55685	6.18647	6.28767	6.46756	6.55394	6.89408	6.98747	7.37704	7.20496	7.59069	8.12172	8.61545	8.92114	9.73076	10.33	12.032	12.8707	13.5531	14.5082	16.4228	17.5497	18.5693	19.1186	19.3914	19.0243	20.4572	20.4809
90	0.543137	0.604351	1.28221	1.65966	1.91263	1.91058	1.93511	2.2426	2.47526	2.60643	2.80708	3.31915	3.66824	3.85143	3.80512	3.92933	4.3236	4.49849	4.75844	4.58669	5.0647	5.23113	5.37965	5.97559	6.40699	6.54822	6.89218	6.89218	7.10955	6.89408	7.16224	7.7603	7.8352	8.33067	8.83136	9.05072	9.87414	10.3692	11.3261	11.5283	12.4806	12.663	14.7623	16.1334	17.7911	18.7735	18.7597	19.704	20.6933
91	0	0.0398075	1.06243	1.37349	1.79555	1.81492	1.71837	1.91417	2.63772	2.73839	3.10347	3.40279	3.61665	3.80231	3.88092	3.97682	4.2023	4.47638	4.78659	5.05813	5.00857	5.07936	5.38	6.05443	6.59107	6.79771	6.96628	7.04842	7.52442	6.98297	7.20985	7.76075	8.08393	8.54419	8.58175	8.74674	9.45372	10.1097	10.159	10.4289	10.6998	10.6121	12.3285	14.0954	16.2501	16.7071	17.9965	18.1302	19.1175
92	0.858794	0.858794	1.47426	1.9373	2.11268	2.06689	2.39829	2.58581	3.00843	3.09607	3.21506	3.39432	3.76987	3.88313	3.8838	4.01207	4.19362	4.50354	5.27546	5.27554	5.36478	5.62873	5.47422	6.1587	6.48793	6.44499	6.65949	6.85375	7.25168	7.46445	7.37299	7.61222	7.6969	8.40242	8.55413	8.5749	8.90478	9.58963	9.95086	10.1648	9.99461	10.0113	10.6821	11.1121	12.8642	13.2563	15.5509	16.2744	17.8682
93	0.213626	0.30585	0.858794	1.39833	1.48076	1.70679	2.35111	2.56215	2.80708	3.21244	3.44351	3.41155	3.5229	3.87967	3.88026	4.17417	4.47308	4.94998	4.92278	5.24938	5.52307	5.98377	5.98377	5.96059	5.99717	5.98653	6.02363	6.32869	6.91564	6.87847	6.85496	6.96398	7.42958	8.04634	8.08345	8.44176	8.58506	9.12974	9.5193	9.54764	9.87004	9.49647	9.76316	9.6671	9.93214	10.0206	11.2212	14.0658	16.6868
94	0.450715	0.511943	0.957523	1.59023	1.79555	1.85592	1.96662	2.81053	2.57943	3.32225	3.76586	3.80231	3.80344	4.04855	4.11503	4.25548	4.30581	4.52859	4.65973	4.52938	5.19994	5.98377	5.98377	5.98377	6.00247	6.09669	6.22227	6.67038	7.55736	7.15597	7.49026	7.41667	7.64478	7.79781	8.0852	8.15862	8.2113	8.66891	9.34815	9.56578	9.95701	9.09854	9.9399	9.99533	9.94086	10.1436	12.5454	15.7781	16.0039
95	1.50172	1.48373	1.71759	2.21923	2.52256	2.11528	2.24144	2.50991	2.9324	3.49273	3.8773	3.84051	4.07976	4.30772	4.29142	3.96116	3.99478	4.30389	4.49514	4.52812	5.45737	5.6588	5.8844	5.71079	5.65237	6.13291	6.15922	6.418	6.56798	6.56059	7.09362	7.31512	7.23004	7.46297	7.66242	7.74285	7.85349	8.57603	8.5494	9.10675	9.92935	10.0786	10.2375	9.86532	9.59699	9.61407	11.8114	13.191	14.1072
96	2.16728	2.67216	2.57712	2.78327	2.84255	2.81035	2.88841	3.43714	3.6798	3.92539	4.2161	4.21806	4.30509	4.12907	3.96116	3.92395	4.19488	4.30509	4.42024	4.52861	4.54054	4.78261	4.97642	5.49152	5.46034	5.98378	6.18173	6.93525	6.52601	6.97499	7.08492	7.08331	7.08007	7.60969	7.9277	8.41716	8.28794	8.82867	8.7594	9.37515	9.93833	9.85242	10.17	9.95475	10.0438	11.1602	11.9802	11.176	11.0041
97	3.47937	3.80231	3.49273	3.49401	3.46248	3.40045	3.59189	3.80311	3.70668	3.68815	3.84051	3.88056	3.95636	3.84051	3.84191	4.12948	3.99601	4.26747	4.38454	4.52764	4.59708	5.09884	5.10238	5.74288	5.44519	6.09013	6.47807	6.17509	6.49986	6.77118	7.02111	7.02313	7.0817	7.51128	7.49437	8.21805	8.48226	8.4631	8.70498	9.31751	9.53106	9.79541	9.81526	9.84796	10.107	10.9134	10.9473	10.8253	9.82568
98	2.98375	3.36376	3.37564	3.46275	3.49273	3.54353	3.86074	3.99857	4.07257	4.02955	3.85986	4.28851	4.30509	4.30509	4.30509	4.66706	5.22648	5.31834	5.73524	5.24958	5.57886	5.33538	5.17594	5.36049	5.30391	5.99953	6.20986	6.25105	6.59935	6.86395	7.20454	7.30369	7.46468	7.49619	7.79712	8.29034	8.48227	8.48226	8.08383	8.62204	9.28363	9.35344	9.41139	9.97666	9.95484	9.8351	9.50314	9.22531	9.65877
99	2.89489	3.22747	3.27096	3.28606	3.46138	3.49273	3.81392	3.82552	4.21619	4.39378	4.29689	4.3566	4.61909	4.54408	4.63917	5.26998	5.08796	4.9949	4.85821	5.32488	5.43409	5.29288	5.32481	5.67464	5.60869	6.33339	6.83097	6.9542	7.02269	7.26749	7.51573	7.94897	7.8189	8.45245	8.08567	8.48387	8.89172	8.66161	7.54633	8.01329	8.48226	8.58119	8.96927	10.0794	9.14973	9.35366	9.02893	9.84061	9.77304
100	3.25886	3.40434	3.39811	3.62219	3.49708	3.4303	3.74068	4.35756	4.63975	4.50361	4.53034	4.78918	4.63975	4.74964	5.14342	5.38816	5.16155	4.87059	5.26111	5.80125	5.61833	5.62165	5.25225	5.25225	5.64909	5.68206	6.70843	6.7601	7.35674	6.98806	7.02273	7.17153	7.43971	8.42391	7.94124	8.4692	8.66257	8.25608	8.32823	8.27192	8.1317	8.52959	9.18825	9.35733	9.42955	9.63235	10.9983	12.0702	11.454
101	3.43243	3.57765	3.8802	3.87999	3.8601	3.89498	4.14584	4.63745	4.6391	4.52597	4.49299	4.64376	4.78886	4.63878	4.87156	4.98591	4.71459	4.69278	5.56724	5.14842	5.65852	5.60918	5.38546	5.3813	5.83833	5.77297	6.55604	6.82489	7.13912	7.58831	7.63596	7.81083	7.9673	8.04588	8.22694	8.69022	8.66257	8.66257	8.30894	8.0587	8.17119	8.6647	8.83249	9.18825	9.15401	9.39857	10.1358	9.83173	10.289
102	3.85594	3.87925	3.88014	3.88018	3.87871	4.01285	4.59081	4.58246	4.54189	4.30792	4.50793	4.54226	4.54054	4.56872	4.6391	4.6391	4.54054	4.79077	5.251	5.71107	5.73191	5.71735	6.12857	6.20978	5.98634	6.44171	6.46243	7.22307	7.38655	7.56834	7.41221	7.56785	7.55321	8.27063	8.35219	8.11135	8.23381	8.52399	7.98192	7.44339	8.08539	9.22668	8.842	8.85284	8.66101	9.01887	9.47053	9.86044	10.5158
103	3.86026	3.87871	3.87871	3.95673	4.28432	4.54626	4.54175	4.54054	4.47419	4.47729	4.74241	4.78838	4.62997	4.82876	5.10019	5.0823	5.2927	5.39875	6.11687	5.99858	6.19782	6.28922	6.43393	6.86736	6.29115	7.02213	7.25746	7.27304	7.56809	7.18155	7.00358	6.76677	7.36997	7.62758	7.6561	8.12593	8.23792	8.41383	7.68449	7.23454	8.48037	8.35339	8.32846	8.30877	8.48725	10.5031	10.8469	10.079	10.1963
104	3.34913	3.84097	3.85052	3.87944	4.07892	4.00664	4.15721	4.40122	4.59434	4.72709	4.82517	4.54238	4.77265	5.24221	5.39875	5.72218	5.79038	5.6457	6.12857	6.3869	6.43908	6.5833	6.9542	7.02054	7.02134	7.16661	7.44748	7.31824	6.7551	6.64883	6.71107	7.30492	7.00764	7.87094	7.75418	8.40769	9.34981	9.01473	8.30453	8.41647	8.95647	9.24431	9.61349	8.66151	8.99936	9.04642	9.1669	10.3802	11.2583
105	3.84051	4.03058	4.15571	4.41532	4.5757	4.55812	4.62776	4.60252	4.82517	4.85423	4.85423	4.82499	5.59921	5.71479	5.67054	5.99497	5.62032	5.73363	5.9864	6.09354	6.80089	7.01979	7.09101	6.9542	7.24794	7.24794	6.97117	7.0138	6.65304	6.77285	7.42293	7.8226	7.53054	7.93184	8.68867	9.08942	9.27628	9.48361	9.68391	9.05255	9.99656	10.3083	10.5244	10.4566	10.6586	10.5828	11.1853	12.0169	12.4335
106	4.74781	4.79778	4.82499	4.71632	4.65994	4.76259	4.94542	5.14507	5.35014	4.85423	4.82517	5.56428	5.74965	5.70983	5.48376	5.74338	6.13196	6.24993	6.61912	6.69545	7.26396	7.33943	7.52148	7.13681	7.63556	7.75774	7.48428	7.15594	7.53995	7.91275	8.03885	8.39045	8.3873	8.48226	9.37613	9.45348	10.1835	9.73809	9.3097	9.89769	10.9249	11.8497	11.8753	12.5132	11.7269	11.9465	12.6589	13.7421	17.179
107	4.52848	4.54151	4.44536	4.52249	4.63837	4.84757	5.34945	5.72261	5.83031	5.3991	5.3991	5.70488	5.8394	5.5711	5.90684	6.03681	6.58585	6.69176	7.1079	7.83106	7.84803	8.44475	8.39569	7.96777	8.79241	7.77428	8.06886	7.48639	8.12709	8.51241	8.48547	8.48226	8.37505	8.48226	9.72269	10.0503	10.172	10.1848	10.8993	11.2328	12.289	13.1077	14.034	12.5088	12.0788	12.8096	19.0891	17.8837	19.4596
108	4.92463	4.63787	4.49306	4.72404	5.41188	5.63299	6.11152	5.79612	5.80944	5.47288	5.52074	5.49129	5.90061	6.36398	6.542	7.01972	6.87632	7.05506	7.58721	8.226	8.52909	8.87674	8.65382	8.9175	8.58771	8.07894	7.59642	7.73804	7.97257	8.42938	8.52169	8.59765	8.69797	9.17386	10.1026	10.453	10.2714	10.7711	11.5964	12.6993	15.5528	17.4108	19.4822	13.2487	14.8388	15.2657	16.7284	18.5162	17.0484
109	5.14603	5.68266	5.48797	5.89546	6.18371	6.18371	5.43606	5.43765	5.57987	5.63137	5.50957	5.60261	6.38254	6.17327	6.59001	6.81786	7.01833	7.39238	8.20343	8.14391	8.70681	9.02474	8.93202	8.6634	8.31484	8.5334	8.41411	8.15722	8.43931	9.00763	9.12577	10.2083	10.1738	10.5164	10.8724	10.4853	10.8735	11.402	12.1078	14.017	13.3211	15.0364	13.9618	13.6476	14.3746	14.5143	16.4565	17.3911	16.5996
110	5.5061	5.27718	5.83075	5.81674	5.52135	5.17746	5.12067	5.30506	5.63773	5.84359	6.00822	6.39589	6.35344	6.72828	7.06725	7.11052	7.29785	7.95959	8.11995	8.52909	9.2407	9.32286	8.80764	8.482	8.49443	8.40118	8.73057	8.87981	9.12035	8.89538	9.86252	10.8602	10.6338	10.935	10.7621	10.8729	10.8735	10.9378	12.0211	12.6281	12.1014	12.013	11.7543	13.6374	12.9283	13.216	12.0752	12.1085	11.6085
111	5.35126	5.70196	5.92059	5.98377	5.67495	5.94198	5.42483	5.56374	6.12616	6.79314	6.38521	6.84567	7.04742	7.02069	7.10763	7.06852	7.62084	8.0627	8.27332	8.84021	9.15689	8.83182	8.91803	8.21354	8.80823	9.06026	8.87531	9.12035	9.67807	9.40226	10.7123	11.676	11.8349	10.6688	10.1641	10.5163	10.8516	11.1715	11.0835	11.3713	11.3586	11.1416	11.556	10.3514	10.7812	11.6962	11.8033	12.684	11.7721
112	5.98377	6.75117	6.45023	6.12495	6.12616	6.46377	6.12754	6.2887	6.83817	6.93309	6.79361	7.11987	7.02026	7.00678	7.10763	7.49448	7.80819	8.26971	8.67683	9.18108	9.07869	8.96855	8.43533	8.16052	9.16931	8.95696	8.96239	9.79738	10.3617	11.0124	10.9906	12.3119	11.4297	10.5048	10.2539	9.62537	10.1152	10.7768	10.9133	11.428	11.1449	10.7657	11.5979	10.4079	11.4496	11.7376	12.0104	10.6041	11.2437
113	6.86124	6.12616	6.17066	6.12025	6.60654	6.65777	6.72092	6.73537	6.75495	6.7265	7.01803	7.01818	7.12009	7.02026	7.49448	7.76145	8.15371	8.39779	8.20096	8.34518	8.25886	8.43533	8.12324	8.96729	8.91484	9.07554	9.61705	9.73036	11.1871	11.099	10.8865	10.6109	9.59387	9.73965	9.53008	8.87456	10.1673	10.5614	10.1996	11.1083	11.0473	10.8641	10.8096	11.6711	10.9632	11.4981	10.9902	10.5015	10.4328
114	5.9181	6.44783	6.39279	6.94833	7.01803	6.7961	6.79454	6.79454	7.01678	7.09278	7.01762	7.01678	7.01636	7.49448	7.74738	7.62093	8.19859	7.93728	7.7726	8.09934	8.28158	8.57236	9.1004	9.56775	8.91484	9.41068	9.44688	10.0002	10.3683	9.64042	9.84287	9.47334	9.50237	9.57435	9.00695	8.76161	9.10152	10.0193	10.1019	10.909	10.4087	10.1048	10.5667	10.887	10.402	9.96036	10.0969	10.4831	10.3667
115	6.13778	6.65698	6.80267	7.01636	7.01344	7.01566	7.01762	7.01601	7.00399	7.01636	7.0172	7.0172	7.17361	7.63265	7.5975	8.20096	8.27739	8.20096	8.42553	8.5683	8.59522	9.11712	9.25863	9.29439	9.88058	10.1519	10.1228	10.7844	10.1419	10.7504	10.8318	10.051	9.53929	9.2495	8.94822	8.74497	9.31723	9.37293	9.70393	10.0971	9.13642	9.73275	10.4148	10.4595	10.5459	10.7968	9.7226	9.42629	10.5666
116	6.60661	6.79454	6.9917	7.01803	7.0172	7.01915	7.01801	7.01566	6.97832	7.0172	7.0172	7.12096	7.36813	7.857	8.30524	8.68339	9.0074	8.26585	9.19498	8.59522	9.30604	9.19758	9.52516	9.80002	10.3115	10.785	10.4269	11.0629	10.222	10.4348	10.132	9.36464	9.476	9.44072	9.48989	9.37574	9.14075	9.90868	10.5251	9.71448	9.64419	10.1863	11.3099	11.362	11.2731	11.4363	10.7698	11.2744	12.1756
117	6.88999	7.06085	7.01915	7.01801	7.01801	7.0172	6.66358	6.77332	6.90272	7.00864	7.1343	7.62519	8.27843	8.35015	8.44181	9.0038	7.99536	9.00274	8.78639	9.39369	10.1267	9.8995	10.3084	9.97257	10.4934	10.5634	10.6453	10.3724	10.802	11.602	11.2369	10.6005	9.93252	9.95552	10.4337	10.1424	10.2381	9.98384	10.7856	9.59396	9.8905	9.71894	11.5452	10.9359	11.1342	11.1861	10.4111	11.1538	12.3051
118	7.17001	7.10231	7.09752	7.0172	6.95313	7.01761	6.98555	6.98891	7.03977	7.34409	7.29551	8.69238	9.77504	9.22108	9.33025	8.57122	8.98717	9.39371	9.7786	10.7857	11.041	9.9148	9.8015	9.88182	10.4448	10.1419	10.2961	10.6767	10.4973	11.2992	10.6176	9.52558	9.72686	10.0134	10.0295	10.4942	9.93355	10.711	10.1107	9.38596	9.48533	10.4051	10.8957	9.94483	10.6835	10.7813	10.7401	10.6734	12.3051
119	6.89978	7.0172	7.0172	7.0172	6.79439	7.0172	6.80089	7.41974	7.01761	8.288	9.92963	9.03027	9.33597	9.39387	8.9529	8.69836	8.62702	9.41283	10.1033	10.2761	10.0093	9.84136	9.56004	9.65907	9.33906	9.64119	9.85237	10.0094	10.7569	11.2752	10.4918	9.32466	10.1752	10.496	10.0692	9.81055	9.59863	10.9546	9.53008	9.70001	9.17883	9.64098	8.97077	9.97542	9.80084	11.5533	10.9861	11.8882	12.5985
[truncated: 71 more columns]
