# Supplementary material for: Unexpected long-term variations of Saturn’s ring current revealed by energetic neutral atom imaging
Source: Research Square preprint supplement (doi:10.21203/rs.3.rs-3271171/v1), 2023-09-18
Supplement: Supplementary file 2 [file 23eb7a6b73386af5590b3311.xlsx]

## Sheet: ff5
	0	1	2	3	4	5	6	7	8	9	10	11	12	13	14	15	16	17	18	19	20	21	22	23	24	25	26	27	28	29
0	0.310954	0.324253	0.33619	0.342556	0.356469	0.370081	0.385357	0.401977	0.413379	0.44045	0.461258	0.461682	0.470651	0.497028	0.476779	0.489906	0.506986	0.509072	0.486237	0.460744	0.442881	0.429792	0.394251	0.393452	0.324122	0.277343	0.220298	0.207392	0.198585	0.189045
1	0.312268	0.316251	0.318904	0.33581	0.343167	0.354063	0.35143	0.364831	0.399602	0.413824	0.423451	0.428441	0.419159	0.451865	0.474017	0.503396	0.49738	0.499865	0.507717	0.436947	0.437827	0.428592	0.399355	0.308607	0.321882	0.299923	0.225355	0.205486	0.188426	0.183757
2	0.316127	0.317398	0.318779	0.327895	0.333516	0.339197	0.344741	0.354862	0.401246	0.418969	0.428353	0.411107	0.437995	0.450319	0.463893	0.453772	0.474664	0.467385	0.447693	0.44364	0.398562	0.375964	0.336563	0.259126	0.237166	0.1993	0.203726	0.189065	0.189549	0.18766
3	0.301578	0.313989	0.329513	0.323739	0.330033	0.365312	0.36513	0.372446	0.389532	0.413431	0.427746	0.427746	0.426906	0.441239	0.453702	0.465734	0.478859	0.478597	0.462627	0.447804	0.4336	0.376199	0.351987	0.295103	0.287484	0.212614	0.200635	0.194761	0.187073	0.188225
4	0.289769	0.311357	0.311357	0.317302	0.332997	0.353606	0.365168	0.37146	0.371233	0.400065	0.397863	0.42529	0.436172	0.454164	0.454164	0.453155	0.447086	0.460282	0.438728	0.445138	0.387849	0.359733	0.317244	0.238205	0.217663	0.220163	0.189406	0.185504	0.197534	0.183941
5	0.311137	0.304582	0.326153	0.323903	0.358236	0.358236	0.387398	0.390557	0.394824	0.404746	0.400144	0.41265	0.430636	0.430636	0.445031	0.434246	0.470486	0.46558	0.395499	0.399376	0.409982	0.35542	0.305025	0.237967	0.186245	0.188499	0.179133	0.180415	0.176224	0.168313
6	0.311137	0.314419	0.334173	0.335175	0.364143	0.381422	0.388286	0.388047	0.39728	0.414147	0.414476	0.449405	0.432802	0.441484	0.446475	0.452275	0.464051	0.464051	0.405967	0.315024	0.279525	0.314764	0.314764	0.271343	0.215361	0.207306	0.192633	0.192633	0.19158	0.189181
7	0.314917	0.335034	0.341226	0.34271	0.36306	0.397903	0.397903	0.417158	0.432041	0.419772	0.46605	0.47854	0.465478	0.486363	0.532341	0.506468	0.49272	0.395868	0.395868	0.358216	0.284533	0.251842	0.246617	0.22436	0.217675	0.197519	0.18143	0.188054	0.169776	0.176587
8	0.321798	0.335752	0.341226	0.343753	0.362183	0.407457	0.407457	0.436172	0.45396	0.465381	0.499022	0.502768	0.514532	0.54457	0.536268	0.527487	0.527923	0.490053	0.490053	0.422586	0.35571	0.284128	0.286681	0.23811	0.230156	0.205606	0.206827	0.198203	0.194821	0.190262
9	0.328869	0.326909	0.360132	0.362145	0.399885	0.440004	0.418892	0.446194	0.481084	0.494019	0.552955	0.557351	0.556578	0.576223	0.558317	0.538124	0.483115	0.483115	0.486457	0.46893	0.460546	0.346998	0.346998	0.30721	0.267752	0.240418	0.203357	0.203357	0.201153	0.204441
10	0.328869	0.378348	0.379534	0.40179	0.447227	0.447227	0.45257	0.476176	0.500061	0.554127	0.592898	0.627973	0.620036	0.620036	0.612644	0.594378	0.568797	0.592071	0.569783	0.507276	0.481863	0.443147	0.369948	0.34867	0.324251	0.356906	0.238544	0.221652	0.226141	0.214778
11	0.376311	0.404717	0.404717	0.394496	0.433687	0.460038	0.504197	0.520569	0.552279	0.616916	0.648639	0.652948	0.659221	0.684639	0.684639	0.65555	0.658278	0.659788	0.625713	0.607612	0.55434	0.520946	0.509583	0.488466	0.457396	0.381344	0.379025	0.340772	0.298549	0.252536
12	0.380947	0.389586	0.407521	0.419397	0.464017	0.539235	0.572626	0.577788	0.614169	0.698759	0.697596	0.697596	0.721895	0.71421	0.778082	0.746757	0.703919	0.683371	0.673759	0.631025	0.566497	0.566758	0.53806	0.520805	0.500352	0.438884	0.353794	0.328539	0.276507	0.253032
13	0.378255	0.403431	0.420058	0.457156	0.470445	0.527761	0.581906	0.582101	0.654273	0.698244	0.692976	0.701388	0.737236	0.76586	0.818479	0.774872	0.736662	0.73739	0.697127	0.679622	0.699629	0.625752	0.608217	0.532822	0.512375	0.494676	0.431349	0.476682	0.430454	0.273209
14	0.383076	0.405079	0.425661	0.45809	0.501398	0.560729	0.602629	0.629549	0.705164	0.745829	0.730646	0.740975	0.785875	0.824022	0.865188	0.852779	0.822643	0.807855	0.762321	0.695579	0.717931	0.703547	0.665859	0.59536	0.541592	0.461135	0.413994	0.383994	0.306657	0.313023
15	0.415553	0.441969	0.482195	0.54771	0.577878	0.623762	0.661862	0.743632	0.748944	0.736597	0.781119	0.852698	0.877419	0.867986	0.845954	0.839328	0.832751	0.779355	0.743141	0.767417	0.729326	0.686001	0.674743	0.576677	0.533092	0.531343	0.517771	0.466074	0.366905	0.366938
16	0.453238	0.467134	0.51619	0.522748	0.569543	0.637735	0.672452	0.741988	0.766225	0.791206	0.851848	0.853772	0.875388	0.976585	0.960233	0.880649	0.880446	0.855348	0.800389	0.775348	0.743	0.746039	0.719875	0.666218	0.589165	0.559804	0.543601	0.505982	0.440239	0.348053
17	0.471589	0.506405	0.540799	0.57232	0.615084	0.68272	0.698982	0.771668	0.777854	0.832642	0.873556	0.927178	0.96318	0.964198	0.937141	0.899705	0.878957	0.872138	0.845679	0.776955	0.73243	0.713434	0.670396	0.623152	0.523525	0.536466	0.499872	0.487573	0.389137	0.323732
18	0.512696	0.545896	0.575532	0.643495	0.692285	0.703316	0.762045	0.817171	0.85363	0.883582	0.934747	0.934747	1	0.977889	0.947008	0.912781	0.90919	0.893366	0.872198	0.836522	0.765205	0.699326	0.71628	0.613658	0.557836	0.541071	0.518982	0.457475	0.356847	0.351049
19	0.547153	0.581835	0.581835	0.64928	0.682318	0.75065	0.789917	0.802528	0.83917	0.873823	0.9117	0.985173	0.994849	0.948423	0.948423	0.930546	0.902793	0.888247	0.841221	0.832927	0.768476	0.67645	0.616931	0.608349	0.583599	0.541788	0.429882	0.322085	0.322367	0.311216
20	0.512947	0.567575	0.588827	0.670388	0.72111	0.745319	0.782201	0.853751	0.853259	0.901132	0.928937	0.960533	0.974609	0.971437	0.944612	0.939917	0.909646	0.853864	0.812996	0.795676	0.795676	0.722389	0.683891	0.601239	0.602176	0.478719	0.399797	0.324652	0.324652	0.320071
21	0.544118	0.581256	0.647443	0.668296	0.730894	0.815247	0.822098	0.851062	0.923552	0.957152	0.94312	0.943444	0.93988	0.948664	0.969559	0.9812	0.891491	0.891491	0.839286	0.809666	0.736078	0.657131	0.657131	0.616378	0.530335	0.47953	0.417379	0.417379	0.336258	0.327842
22	0.568827	0.612958	0.659527	0.67461	0.731861	0.813561	0.813561	0.875833	0.926997	0.944259	0.943006	0.949897	0.948525	0.95052	0.925381	0.916525	0.891536	0.853642	0.853642	0.78611	0.691981	0.658451	0.602074	0.510781	0.536104	0.478918	0.416188	0.390274	0.32657	0.28938
23	0.564103	0.637224	0.659527	0.699002	0.749939	0.813569	0.813569	0.84222	0.889913	0.918467	0.933898	0.923457	0.938227	0.92832	0.89424	0.844972	0.808078	0.790657	0.790657	0.764915	0.668981	0.608204	0.608508	0.510885	0.457536	0.368138	0.33372	0.316114	0.303248	0.290818
24	0.596052	0.600489	0.673914	0.73634	0.784671	0.815528	0.826995	0.81694	0.881593	0.926206	0.959995	0.953184	0.98237	0.949468	0.890625	0.848987	0.821316	0.821316	0.744126	0.66819	0.627869	0.625049	0.625049	0.520954	0.493258	0.39583	0.356715	0.356715	0.307529	0.292984
25	0.596052	0.645266	0.723777	0.766215	0.787765	0.787765	0.829804	0.884078	0.920848	0.940928	0.963714	0.943839	0.911453	0.911453	0.900886	0.850409	0.818686	0.779846	0.7542	0.699995	0.620557	0.568931	0.582574	0.458668	0.411036	0.358966	0.303187	0.297673	0.291159	0.281365
26	0.620358	0.698839	0.698839	0.745396	0.785519	0.833433	0.865389	0.879422	0.928904	0.95512	0.924503	0.935811	0.909369	0.87392	0.87392	0.822553	0.781848	0.752089	0.685171	0.682425	0.604038	0.542047	0.425401	0.39003	0.350128	0.325348	0.314347	0.296835	0.294223	0.285931
27	0.608446	0.65726	0.697191	0.774767	0.777783	0.826851	0.896532	0.900732	0.909051	0.933968	0.926045	0.926045	0.93832	0.841253	0.820802	0.778321	0.717698	0.688012	0.65901	0.655969	0.610141	0.516116	0.415337	0.3898	0.343229	0.31947	0.314657	0.302271	0.287865	0.289067
28	0.611422	0.643885	0.703947	0.741206	0.787544	0.844185	0.885166	0.922781	0.944499	0.927165	0.925983	0.913199	0.901287	0.860598	0.814172	0.792853	0.76223	0.741254	0.665984	0.640673	0.563758	0.476278	0.377589	0.363865	0.34173	0.342877	0.319899	0.302613	0.283466	0.282452
29	0.604272	0.646882	0.692999	0.717188	0.788188	0.839586	0.860412	0.898352	0.903616	0.904085	0.905034	0.885002	0.866134	0.912291	0.86745	0.848326	0.749871	0.704722	0.681732	0.660934	0.612025	0.499945	0.433665	0.41538	0.355496	0.326223	0.31857	0.30903	0.305611	0.291996
30	0.591744	0.64633	0.672825	0.711616	0.768606	0.831749	0.841414	0.884817	0.950654	0.914628	0.910311	0.916662	0.921094	0.869414	0.833319	0.805445	0.761743	0.714162	0.687945	0.652715	0.581833	0.495769	0.396615	0.419655	0.401536	0.341108	0.332061	0.317646	0.298675	0.291098
31	0.620708	0.643892	0.69521	0.725057	0.784868	0.817386	0.851139	0.877144	0.867276	0.893267	0.88209	0.857336	0.864874	0.834451	0.822556	0.784731	0.769755	0.756967	0.697864	0.650486	0.67473	0.616427	0.581385	0.474865	0.406635	0.348015	0.312091	0.300453	0.291148	0.289829
32	0.607809	0.651455	0.671139	0.706215	0.755576	0.826107	0.827446	0.863513	0.864031	0.877199	0.862981	0.867397	0.861901	0.860815	0.842673	0.844519	0.835131	0.794665	0.754735	0.745155	0.717069	0.654197	0.620284	0.563657	0.528061	0.3983	0.308907	0.298926	0.277987	0.269211
33	0.61708	0.646674	0.692614	0.739976	0.756321	0.799016	0.8397	0.848892	0.839497	0.853017	0.858179	0.858179	0.879416	0.847608	0.818491	0.795739	0.802533	0.770993	0.755198	0.720226	0.67216	0.633194	0.610604	0.52945	0.451371	0.373041	0.379352	0.359629	0.284038	0.272832
34	0.61724	0.689858	0.689858	0.693972	0.736851	0.804787	0.780043	0.792314	0.857075	0.837566	0.826292	0.81819	0.808412	0.773363	0.773363	0.745163	0.754685	0.734781	0.68548	0.667329	0.629236	0.538172	0.503734	0.411168	0.447947	0.460222	0.400689	0.384272	0.304268	0.290423
35	0.597149	0.6654	0.671289	0.711869	0.763326	0.784105	0.816741	0.820973	0.839914	0.851088	0.827275	0.820929	0.802946	0.785836	0.758634	0.760615	0.741096	0.718266	0.668611	0.651539	0.651539	0.641483	0.621729	0.539838	0.526702	0.479699	0.405279	0.379558	0.379558	0.37857
36	0.599181	0.604808	0.677757	0.685983	0.734884	0.799606	0.791549	0.813728	0.840355	0.866483	0.853399	0.844488	0.836217	0.804462	0.754269	0.757645	0.708536	0.708536	0.671751	0.654163	0.639629	0.589986	0.589986	0.539462	0.537583	0.541614	0.494833	0.494833	0.413348	0.396695
37	0.59255	0.635564	0.634914	0.679089	0.73947	0.774859	0.774859	0.804512	0.79345	0.829299	0.818042	0.787225	0.774225	0.75777	0.742463	0.755901	0.755983	0.692043	0.692043	0.672895	0.65929	0.639802	0.621166	0.577189	0.595218	0.5808	0.5551	0.491351	0.461957	0.417455
38	0.576197	0.616051	0.634914	0.657696	0.698595	0.750839	0.750839	0.794911	0.783262	0.786965	0.758838	0.788712	0.78662	0.773243	0.785997	0.770162	0.708444	0.689929	0.689929	0.669757	0.669011	0.658983	0.641386	0.593249	0.59365	0.536069	0.482398	0.450637	0.408166	0.386403
39	0.562636	0.599167	0.64393	0.688111	0.740343	0.768531	0.766832	0.783872	0.817517	0.802612	0.792468	0.784277	0.753502	0.769967	0.787392	0.743806	0.708375	0.708375	0.685468	0.664539	0.674163	0.642103	0.642103	0.64586	0.631277	0.603561	0.561942	0.561942	0.512263	0.504019
40	0.562636	0.582025	0.655706	0.684192	0.746024	0.746024	0.789205	0.783472	0.799743	0.799306	0.788939	0.745173	0.702994	0.702994	0.712403	0.700564	0.700978	0.688234	0.674464	0.673247	0.675823	0.642815	0.621413	0.613187	0.567222	0.52014	0.506535	0.503522	0.48153	0.505621
41	0.561916	0.564462	0.564462	0.654755	0.675929	0.732186	0.751416	0.774153	0.786954	0.76769	0.743868	0.748288	0.715682	0.72405	0.72405	0.726813	0.698516	0.671785	0.652078	0.616935	0.609446	0.605187	0.587757	0.578885	0.555343	0.567566	0.549052	0.541189	0.529244	0.532344
42	0.529303	0.53938	0.593981	0.659812	0.685411	0.714793	0.752465	0.770645	0.740585	0.731931	0.744032	0.744032	0.749212	0.716737	0.711693	0.727849	0.713616	0.709214	0.690478	0.66977	0.629352	0.606926	0.590391	0.591567	0.56532	0.535677	0.518663	0.50066	0.480495	0.472438
43	0.507848	0.518617	0.549705	0.588048	0.630706	0.691176	0.71507	0.734288	0.727729	0.710471	0.741094	0.724796	0.723384	0.717119	0.696672	0.70813	0.674465	0.657057	0.645331	0.628116	0.590425	0.570251	0.56789	0.582222	0.55022	0.515647	0.501762	0.489069	0.483726	0.478181
44	0.492329	0.512303	0.547802	0.576981	0.636818	0.683516	0.697444	0.70574	0.696793	0.722229	0.716113	0.748629	0.762194	0.742841	0.7154	0.680338	0.673633	0.662448	0.653314	0.625803	0.606314	0.609476	0.594059	0.561481	0.534544	0.512812	0.501616	0.491623	0.483744	0.476112
45	0.438514	0.466511	0.504329	0.552267	0.593249	0.62942	0.677104	0.684822	0.703259	0.706897	0.716989	0.743809	0.724708	0.731608	0.716187	0.690464	0.69849	0.679109	0.649752	0.644766	0.618432	0.601943	0.560971	0.566048	0.536148	0.532307	0.531267	0.521205	0.519087	0.509182
46	0.431239	0.448976	0.500091	0.535946	0.584222	0.607753	0.632612	0.664382	0.655561	0.67476	0.662182	0.667751	0.673033	0.687315	0.716585	0.707599	0.683422	0.673242	0.630576	0.606648	0.593619	0.579609	0.563862	0.551524	0.535443	0.526083	0.526407	0.519777	0.49308	0.494954
47	0.411044	0.43621	0.495322	0.527992	0.578192	0.594948	0.624905	0.647638	0.654423	0.68276	0.688265	0.688502	0.656298	0.671149	0.690589	0.665924	0.638139	0.618322	0.604815	0.590419	0.577025	0.575107	0.539794	0.535793	0.542846	0.519684	0.50493	0.50174	0.507584	0.504358
48	0.420669	0.442501	0.478348	0.535761	0.546918	0.566088	0.618893	0.6303	0.658134	0.643235	0.683734	0.683734	0.669999	0.67012	0.650297	0.647477	0.619882	0.588063	0.604745	0.609086	0.593206	0.597273	0.600919	0.612642	0.583624	0.552154	0.55773	0.552958	0.544226	0.538458
49	0.410934	0.454316	0.454316	0.495159	0.534435	0.536886	0.591352	0.627468	0.643554	0.642805	0.66204	0.643677	0.691321	0.645589	0.645589	0.643071	0.630361	0.601965	0.634478	0.608951	0.601624	0.593847	0.614026	0.592689	0.579639	0.607555	0.596806	0.589353	0.574934	0.551794
50	0.384126	0.406891	0.470247	0.486708	0.522812	0.522812	0.603562	0.607901	0.60059	0.60179	0.623174	0.634868	0.636145	0.636145	0.611363	0.634785	0.667499	0.654126	0.624178	0.614262	0.602863	0.597862	0.594491	0.607506	0.611252	0.596887	0.585037	0.558233	0.50581	0.490099
51	0.384126	0.401069	0.416019	0.457261	0.492336	0.533759	0.547896	0.578763	0.580099	0.613845	0.621808	0.640182	0.638102	0.643878	0.657325	0.661472	0.655225	0.655225	0.659988	0.643575	0.633073	0.64949	0.64949	0.630557	0.618569	0.583841	0.57533	0.57533	0.521151	0.496879
52	0.392833	0.417765	0.415812	0.436325	0.454348	0.511967	0.511967	0.5518	0.589664	0.608743	0.621852	0.626558	0.627179	0.666207	0.670057	0.667162	0.628696	0.655492	0.655492	0.684407	0.628745	0.600664	0.568306	0.566147	0.547211	0.552753	0.57269	0.552227	0.519765	0.497415
53	0.384853	0.392666	0.415812	0.411929	0.45105	0.507221	0.507221	0.54472	0.554546	0.568539	0.587548	0.614707	0.589246	0.615846	0.643181	0.626148	0.6877	0.665317	0.665317	0.594169	0.533156	0.558533	0.556041	0.531547	0.542632	0.555004	0.531822	0.516587	0.472285	0.458241
54	0.355763	0.379956	0.392427	0.397368	0.446553	0.477833	0.494821	0.5036	0.525289	0.550037	0.576531	0.60255	0.563082	0.609918	0.615664	0.586759	0.613314	0.613314	0.617634	0.542413	0.604014	0.571136	0.571136	0.561513	0.543535	0.495688	0.486168	0.486168	0.459539	0.444548
55	0.330149	0.355949	0.36217	0.381689	0.399471	0.44155	0.454444	0.449529	0.480756	0.524134	0.498568	0.53851	0.550448	0.548473	0.549736	0.563145	0.577158	0.579518	0.552858	0.555754	0.555754	0.579723	0.535348	0.514299	0.503766	0.507048	0.47598	0.436914	0.436914	0.438935
56	0.345714	0.35603	0.35603	0.374881	0.38753	0.424375	0.428234	0.452895	0.493119	0.501247	0.507765	0.55057	0.534452	0.565496	0.565496	0.567428	0.577626	0.535825	0.547509	0.5463	0.521856	0.509936	0.504526	0.510091	0.506187	0.496847	0.471749	0.471445	0.431243	0.422324
57	0.324419	0.340875	0.35107	0.383045	0.368991	0.390585	0.426762	0.451293	0.470882	0.488685	0.488999	0.488999	0.493963	0.524961	0.522863	0.526529	0.52669	0.526695	0.539849	0.531753	0.511083	0.510062	0.510267	0.497755	0.464937	0.453593	0.444364	0.432483	0.434238	0.348253
58	0.331156	0.332662	0.342999	0.356711	0.350084	0.375966	0.389878	0.396503	0.399097	0.433591	0.465679	0.487922	0.489151	0.488501	0.49702	0.503746	0.496951	0.496808	0.520662	0.530638	0.539838	0.524897	0.522243	0.48978	0.45357	0.397075	0.39536	0.350985	0.306764	0.244698
59	0.329858	0.329574	0.332818	0.3458	0.360368	0.370112	0.380488	0.399696	0.406779	0.429159	0.468974	0.470608	0.460085	0.467782	0.483234	0.488517	0.496633	0.486155	0.507271	0.493636	0.48514	0.491212	0.498843	0.479771	0.471022	0.442969	0.345769	0.295401	0.214847	0.209004
