# Supplementary material for: Unexpected long-term variations of Saturn’s ring current revealed by energetic neutral atom imaging
Source: Research Square preprint supplement (doi:10.21203/rs.3.rs-3271171/v1), 2023-09-18
Supplement: Supplementary file 3 [file 2e333b77c2ffa08495e742c0.xlsx]

## Sheet: Period3_ENA density
	0	1	2	3	4	5	6	7	8	9	10	11	12	13	14	15	16	17	18	19	20	21	22	23	24	25	26	27	28	29	30	31	32	33	34	35	36	37	38	39	40	41	42	43	44	45	46	47	48
0	5.93652	6.16258	6.39299	6.46064	6.60378	6.6411	6.47581	6.28492	6.3129	6.29373	6.39121	6.36665	6.15152	6.32656	6.33265	6.61766	6.27567	6.15878	6.19105	6.39506	6.56267	6.86109	6.59413	7.03884	7.27252	7.60811	7.56206	7.9075	8.12965	7.64401	7.68659	7.9069	7.30415	8.04994	7.74586	7.49254	7.26535	7.23115	7.11712	7.75811	8.42387	7.68932	8.45658	8.35108	8.7753	8.8058	8.25024	8.2354	8.17149
1	5.81975	6.11058	6.39488	6.40697	6.53242	6.92529	6.45865	6.5625	6.42436	6.37745	6.53264	6.45672	6.43272	6.38037	6.28367	6.41676	6.54591	6.3295	6.67471	6.3057	7.01181	7.13537	6.83994	7.21106	7.43693	7.69947	7.92859	8.01749	8.37421	8.20367	8.3405	8.24226	8.00255	8.36936	7.89219	7.69982	7.87753	7.95855	7.49933	7.7556	8.39214	8.31353	8.14965	8.76853	9.30462	9.15656	9.50234	8.83577	8.27615
2	5.85355	5.61109	6.19952	6.39348	6.65672	6.61007	6.92875	6.65414	6.72841	6.77143	6.50953	6.60174	6.50953	6.85265	6.43058	6.3495	6.41088	6.47798	6.46247	6.57581	6.72079	7.12647	7.04027	6.9856	7.43703	7.80157	7.98554	8.24095	8.73661	8.36755	8.64922	8.78981	8.51848	7.91152	8.32391	8.41351	8.51848	8.4041	8.40812	7.95937	8.28155	8.56309	8.64447	8.79343	9.56952	9.77098	9.55505	9.04314	8.36966
3	5.81518	5.83402	6.01349	6.39278	6.48901	7.22993	6.57676	7.01965	7.01541	6.52529	6.71033	6.98629	6.85645	6.94545	6.91753	6.71603	6.3191	6.39804	6.59939	6.98124	7.15124	7.11073	6.94773	7.09781	7.3164	7.947	8.08926	8.34852	8.73722	8.96332	8.70157	8.70208	8.67928	8.81297	8.58725	8.31507	8.80835	8.65744	9.06108	8.52319	8.66513	8.99902	8.72564	9.43107	9.32995	9.70772	9.91458	9.20021	8.8867
4	5.99518	5.8939	6.21085	6.39385	6.43668	6.65672	6.72285	6.52704	7.14973	7.35196	7.31873	7.12211	7.38705	7.00805	7.11646	7.22465	6.85349	6.40212	6.7052	7.47032	7.24999	7.43741	7.32141	7.37615	7.51009	7.51825	8.25653	8.31402	8.81269	9.36314	9.4481	9.03885	8.9839	8.96562	9.10583	8.67067	8.88972	8.82695	9.47198	9.26529	8.85417	9.11217	9.08167	9.59743	9.38132	9.865	10.565	9.66911	9.52456
5	5.64534	5.85791	6.07568	6.33233	6.38045	6.40257	6.80363	6.75006	7.05645	7.3573	7.58113	7.49662	7.98687	7.75504	7.21696	7.17727	7.378	6.98824	6.98545	7.37253	7.25676	7.46141	7.78112	7.52077	7.56726	8.35355	8.19897	8.39519	8.68918	9.07002	9.70961	9.49341	9.07033	9.22094	9.20785	8.67458	8.8934	9.20731	9.60877	10.0401	9.69397	9.38326	9.8891	9.763	9.70447	10.0159	10.5446	10.4658	9.80111
6	5.60937	5.61498	5.94546	6.33848	6.59765	6.59488	6.74489	6.90643	6.8554	7.07084	7.76003	7.86648	8.03321	7.71993	7.94801	7.62066	7.874	7.77586	7.41052	7.5091	7.46042	7.52149	7.84136	7.98963	7.71456	8.27188	8.58763	8.49401	8.80546	9.02918	9.61761	9.51017	9.51782	9.78826	9.57291	9.3287	9.25515	9.3677	10.0293	10.3497	9.93795	9.78076	10.1551	9.80084	9.82607	9.98161	10.6646	10.5416	9.83953
7	5.61362	5.93934	5.85888	5.97635	6.47444	6.87905	6.88135	6.87386	6.85488	7.24883	7.80771	7.71748	8.11245	8.1876	8.31664	9.05292	8.40362	8.15872	7.7901	7.86765	7.63321	7.68755	8.04061	7.89067	8.20287	8.39113	8.62959	9.12201	9.06742	9.0907	9.98444	9.41974	9.57034	9.87571	9.97957	9.65415	9.85096	10.0234	9.97583	10.4668	10.1086	10.5307	10.5915	10.588	10.215	10.3435	10.6715	10.513	10.5431
8	6.33702	6.1664	6.17015	6.54605	6.55134	6.87449	6.88854	7.60551	7.60581	7.68943	7.65907	7.71882	7.97578	8.16999	8.23854	8.57653	8.48068	8.71993	8.61454	8.4212	8.27216	7.86719	7.54481	8.26887	8.26879	8.42407	8.98965	9.45053	9.56923	9.53992	9.81326	9.34723	9.77396	10.0681	10.1627	10.3696	10.1025	10.5413	10.3535	11.251	10.9496	10.8702	10.6669	10.796	11.4237	10.9189	10.8197	10.8397	10.7521
9	6.32385	6.05886	6.33938	6.66906	6.85573	7.16814	7.31072	7.35466	7.57586	7.85239	8.19721	7.98413	8.0225	7.93969	7.9829	8.48769	8.62907	8.49656	8.82512	8.98394	9.10919	9.56867	8.45204	8.25513	8.38769	8.65007	9.19288	9.59597	9.81518	10.0776	9.71343	10.8016	9.71824	10.398	10.5923	10.3907	10.7703	10.7097	10.9436	11.3198	11.7371	11.5421	11.0939	11.1441	12.5609	12.4925	11.043	10.888	11.1624
10	6.46788	6.44313	6.81686	6.69223	7.09701	7.18938	7.33276	7.42078	8.00518	8.33642	8.06381	8.29492	8.15853	8.01194	8.04909	8.67167	8.79454	8.50106	8.56586	8.99608	8.81544	10.9925	10.7034	10.3747	9.0846	9.0297	9.30703	9.2318	9.94732	10.5078	10.366	10.9844	10.4905	11.9521	11.2046	10.986	10.9616	11.4154	12.4108	11.6664	11.8094	12.1283	11.7649	11.3157	11.9933	12.9031	12.3551	11.2278	11.6759
11	6.75451	6.75643	6.85556	6.94033	7.40905	7.2662	7.36233	7.96745	8.73867	10.0466	10.0444	8.36561	8.79568	8.1715	8.41187	8.23561	8.26742	8.48876	8.22753	8.60426	9.42253	11.3435	12.8814	11.4229	12.49	9.92702	9.71753	9.41503	9.9344	10.7652	11.2364	12.0611	11.4218	12.5187	12.8591	11.6018	11.5159	11.2878	11.9029	12.8084	12.9285	12.2725	12.4586	12.1274	12.8194	12.816	12.8277	13.2183	13.1594
12	7.28594	7.0356	7.18179	7.34571	7.66041	7.95286	8.16835	8.01543	8.32332	9.20534	10.9937	10.5022	9.54251	9.02272	8.66958	9.03557	8.45607	8.30833	8.76386	8.59764	8.87288	10.0647	12.601	13.6712	13.1045	12.4995	10.7852	10.2976	10.1185	11.0517	11.6239	14.5298	13.7378	12.3286	13.0633	12.6394	11.6495	11.91	11.7624	15.8476	16.208	14.493	12.9565	13.3864	14.6288	13.528	12.696	14.8658	16.0452
13	7.48405	7.23027	7.5806	7.495	7.95249	8.18047	8.584	8.38885	8.47574	9.18797	10.433	9.56546	9.54764	9.49661	9.32638	9.84248	8.54804	8.83932	8.71808	8.75393	8.9579	9.46781	11.5416	13.8849	14.7098	15.421	12.53	13.0826	11.995	11.9621	11.7394	14.0964	15.7806	14.4032	14.113	14.0044	12.5071	12.3033	12.1905	12.8281	15.5418	16.2336	15.5956	16.2819	14.1365	13.3313	13.6054	14.7476	16.5601
14	7.4027	7.88619	7.87863	8.15192	8.05605	8.02155	8.54901	8.62143	9.7948	10.1817	10.5536	10.2052	9.46896	10.0862	10.1046	10.365	9.77003	9.72645	9.70311	8.9983	9.16548	9.37762	10.3767	13.9793	17.4331	16.6557	17.7393	16.2716	13.0716	14.091	14.0466	14.8435	16.2354	16.3546	15.8777	16.7076	14.6327	12.7329	12.124	13.2155	13.3632	17.9038	16.1844	17.463	17.8315	16.9064	15.6608	16.3848	17.5983
15	7.25007	7.41691	7.64735	7.98915	8.08027	8.0533	8.04873	8.578	9.0931	11.3807	10.1346	12.0424	11.156	9.89577	10.3269	10.8888	10.729	10.3289	10.6814	9.7186	10.0442	10.0703	11.5675	13.5558	15.5039	17.7184	19.0606	18.4526	18.466	17.1098	17.6492	18.2704	18.3301	16.9711	18.0718	16.857	16.1651	14.1692	12.8834	13.9441	13.5633	14.93	15.1286	15.0436	15.4532	20.1478	15.9556	16.9487	20.282
16	7.57008	7.58505	7.27824	7.89785	8.04892	8.07962	8.14231	8.56221	8.99311	9.74927	10.8462	11.6465	11.1441	9.68746	10.7751	10.007	11.5815	10.6572	10.986	10.7348	12.0996	11.069	12.4201	12.0781	17.2699	18.9521	19.8546	20.9573	20.9085	21.3958	18.6015	20.6274	20.9734	18.3762	17.0848	18.0456	16.4846	15.7935	16.1913	15.7556	14.7294	15.4627	15.0745	15.0735	14.2401	19.8648	18.4892	17.5892	20.7724
17	7.45954	8.01785	8.26088	10.1887	8.38147	8.81347	8.83898	8.87965	9.01433	9.6096	10.9984	10.4618	12.8462	10.2034	10.6063	10.5028	11.3705	10.7718	12.8755	13.4314	12.3315	13.0189	13.8678	14.1549	17.1191	17.5399	18.3597	20.8836	21.3495	21.6482	21.0054	20.2952	20.5212	19.8256	18.9631	17.426	14.5093	15.6578	14.8268	15.5596	16.0995	15.1978	15.6627	16.0678	16.407	20.3532	19.0249	21.0165	22.2784
18	7.64481	8.03742	8.27497	11.6952	10.2849	10.3953	9.22045	9.09	9.68753	10.0429	12.4434	12.3806	12.9848	12.643	10.2673	11.5556	11.6253	15.1722	12.6754	14.2222	14.6253	15.4069	15.9566	15.4499	18.327	19.029	20.1069	21.8263	21.9899	21.0491	21.4884	20.7472	21.6522	17.7956	18.6546	15.3091	16.5793	16.4426	15.1471	14.4139	16.7277	15.8855	16.7716	18.0184	18.502	20.7278	19.0996	23.3876	23.2838
19	8.1047	8.10386	9.83435	11.0936	11.1159	14.0357	11.3268	8.96443	10.3812	11.6756	13.7541	15.0356	14.3451	12.6117	11.8298	13.9512	12.4988	14.7234	13.5869	16.2226	16.9115	17.9537	18.7886	18.5884	18.5738	18.7685	20.3717	21.88	23.0325	21.1696	22.4091	20.6304	21.9387	21.1995	19.2285	16.1803	17.6354	17.6921	15.9156	16.8663	15.9141	16.7699	16.5574	18.6934	20.5285	20.4582	18.9396	21.0993	25.3059
20	8.04235	8.50375	10.7637	11.9676	13.8793	12.8267	13.9474	14.3011	13.8973	14.1196	13.8087	15.2611	14.725	13.8599	14.5504	13.1782	14.1908	14.7284	16.3625	16.6185	18.3475	20.1473	20.8904	20.6572	19.5102	19.5916	21.6952	22.4747	23.2819	23.9482	22.8828	22.7893	22.3572	22.7232	21.546	19.2699	18.8559	18.1451	19.2104	18.8853	17.9132	16.085	17.1925	21.0034	21.5465	22.2594	21.7857	22.6677	25.6807
21	8.44104	8.49225	10.5486	11.5956	12.1667	14.8981	16.3277	14.6634	15.7216	15.1018	14.7076	13.6061	15.3411	15.3437	16.2781	15.9084	16.7526	15.614	16.4305	18.1704	15.3245	19.6569	20.6819	21.7099	21.9366	22.506	20.6243	22.0387	24.2187	24.4111	24.4681	24.0542	23.8173	23.5045	23.7051	22.6682	23.5852	21.3183	20.617	22.4435	21.4843	21.8662	20.1315	23.4239	23.6246	21.0836	23.1026	24.6757	26.3887
22	8.25078	8.67483	9.07388	12.8256	14.1655	14.1761	15.1373	15.9262	16.462	17.7438	17.4081	15.7368	17.2655	15.5354	15.8093	16.9818	17.8931	18.6154	19.0368	20.1145	19.2549	17.4019	20.1696	21.3623	22.3019	22.8136	22.636	23.1897	25.5138	26.9441	25.9757	25.3764	24.2617	24.4652	24.0587	24.3631	24.3154	25.3	25.276	24.8913	23.7747	23.5143	23.6056	25.6087	26.338	25.9954	25.9342	26.6345	27.7889
23	8.94656	9.22897	9.32676	10.4793	13.8341	15.1096	16.6531	16.1508	16.891	16.3047	16.7625	17.824	16.5514	16.8559	17.3335	18.7496	18.2368	18.246	19.8916	19.6359	20.5037	20.2937	21.2165	21.8032	22.6245	22.3214	22.6024	23.2	25.0235	26.4074	26.9684	26.3471	25.9051	25.3655	24.3409	24.7895	26.3381	26.9382	28.1522	27.3209	25.7382	25.9828	26.1297	26.6488	27.0623	27.4019	27.7966	28.254	28.6933
24	11.7697	9.62925	10.0764	11.879	13.9673	13.6517	16.0044	16.2857	17.0045	16.6118	17.2496	17.873	15.7682	18.2074	16.8027	18.3575	19.7902	20.0206	20.1661	21.5681	22.2804	22.0402	22.3326	22.6722	23.6228	23.2029	23.1934	24.6715	24.4758	26.0705	26.1755	26.8812	26.7737	27.5372	27.2457	27.4394	27.2276	28.0027	29.0149	28.6438	28.1968	26.9537	26.3772	28.0782	28.0821	27.86	27.6542	28.2608	30.8257
25	10.1554	11.7545	12.4337	13.3073	15.6485	13.4306	15.631	16.7005	17.834	18.0286	17.6718	17.7595	18.7242	18.0878	19.428	19.5317	19.531	19.7604	21.5714	22.4352	23.5233	24.7104	23.4998	24.7241	24.3308	23.8378	24.2167	24.9999	24.364	25.825	27.721	26.6876	27.5956	27.0009	27.3962	28.2232	27.5457	29.1856	29.2113	29.8552	29.7287	28.5349	27.9322	29.3596	29.7973	29.6438	29.8326	30.1841	32.6875
26	9.63598	9.27676	10.0959	13.1428	15.355	15.8301	15.3062	17.0272	18.0797	18.5017	18.6719	18.6569	19.1463	18.8885	19.2563	19.4014	19.904	19.4796	21.4123	22.3556	24.02	25.4729	26.0593	25.3307	25.8007	25.7405	26.1265	26.1335	26.0427	26.6821	28.2358	28.2868	28.9232	28.1783	27.3629	28.0153	29.0529	29.6762	29.9647	31.2274	31.5862	30.2934	29.1166	30.89	31.2808	31.3908	31.4112	33.0658	33.6172
27	14.2382	13.2348	12.826	11.8528	13.0059	17.031	17.6674	16.7495	17.4358	18.5411	17.5455	16.6323	17.5348	19.4401	19.782	19.9955	20.681	20.4828	21.1313	22.7752	24.3255	26.3147	27.2829	26.5098	27.6315	27.8221	28.4328	28.3262	27.8902	26.809	28.5929	29.2204	29.894	29.2977	29.6496	30.664	30.5907	30.4294	31.3631	32.0204	31.2537	34.0388	31.9897	31.6019	31.2688	33.0314	34.1516	34.4146	35.1563
28	14.5414	15.5724	16.0988	16.1577	14.2645	15.3386	17.5665	17.2154	16.8612	18.4123	17.71	17.3312	17.3356	17.4185	18.3143	21.2451	21.5794	21.9201	21.2511	22.1644	23.9319	25.562	27.5678	27.2304	28.6652	28.4436	28.4118	29.062	28.5811	27.6894	28.7568	30.2084	30.8062	30.7258	31.2374	31.8454	30.9156	31.8511	32.8385	32.5499	32.4464	32.7854	33.2706	32.8193	34.3886	34.8982	36.0637	37.1324	38.2141
29	16.3476	16.9173	15.5659	16.5772	16.3741	15.7792	16.8329	17.2022	17.7404	18.6413	19.044	18.4197	17.9793	17.3951	19.2395	20.6395	22.1336	22.0362	22.4008	23.4614	24.0649	23.9294	27.3155	28.0963	28.4917	29.3209	29.3817	29.6406	30.2778	29.4123	28.8161	30.7521	31.9203	33.1284	33.954	33.4563	32.6606	32.0052	33.7734	35.6876	34.6789	34.5682	35.5601	35.2354	36.6868	38.7589	37.0898	38.6483	39.8939
30	16.9817	17.3863	17.3684	17.74	17.7726	17.0438	17.8004	18.2881	18.6994	18.0092	19.176	19.6523	20.1205	20.3731	19.6211	21.3959	22.3864	22.8008	23.2721	24.2027	24.4521	25.1165	26.2169	27.5881	28.6112	29.8619	31.2642	30.6797	31.0823	31.9143	30.6813	31.1554	31.5391	34.0791	36.6755	35.918	35.4086	35.7617	37.4398	36.3588	36.822	37.1671	37.3413	36.7189	39.8551	41.0303	40.0118	41.912	40.5961
31	17.9714	17.9078	17.7401	18.1535	18.3047	18.6923	18.2712	18.0919	17.0851	18.0131	19.4913	19.57	20.3276	20.5898	19.989	21.2144	22.1964	22.9448	23.7656	25.2392	24.7173	26.2276	26.5417	27.349	29.5093	30.0492	30.8365	31.8859	33.6021	32.7132	30.0807	32.5332	32.2607	34.7582	35.7644	36.0079	37.3527	38.8242	37.5322	37.4261	38.2384	38.46	39.4287	39.6394	41.4535	42.892	42.7269	43.0165	42.633
32	17.5668	18.2754	19.0001	18.785	18.7961	18.7531	18.9597	19.911	19.3752	19.2469	19.293	19.687	20.6812	20.9677	21.8429	22.2032	22.6929	23.3265	24.9342	25.2787	26.1319	25.9675	27.2505	27.502	28.1953	29.5193	30.5876	32.2061	34.7441	33.2758	32.9797	32.5996	33.8101	35.3318	36.3124	37.7904	38.4479	39.6728	38.2955	39.6022	39.699	41.1142	40.6281	42.3152	43.8875	43.7385	43.1739	43.7244	45.941
33	17.5808	17.9316	18.5191	18.619	19.2185	18.9809	20.365	20.5251	19.6474	19.4457	20.09	20.5286	21.2089	21.5305	22.4486	23.4309	23.8746	24.3281	25.9232	26.0418	27.2251	26.6819	28.002	28.9739	28.3134	29.1564	30.3633	32.3019	34.9498	34.8517	34.0147	33.6109	33.9641	36.0491	36.8502	38.5818	41.9092	43.1939	41.7815	40.6797	40.8473	42.5483	43.2148	44.7454	46.9527	47.5929	47.4964	46.7375	48.3942
34	17.7801	18.294	19.4047	19.4646	20.3304	20.3013	20.3926	20.787	20.8742	20.9287	21.5274	21.6909	22.0535	22.6911	22.9812	23.9576	25.3501	25.4474	26.5568	27.4379	28.6262	26.7672	27.8172	29.2269	29.8982	30.7697	32.3338	33.818	34.5658	36.9017	36.3766	35.5708	34.7364	37.7447	40.3498	42.0579	43.0497	45.2098	43.658	43.6263	45.4031	45.6884	46.5035	48.23	50.9938	50.8139	51.3522	51.0574	53.8354
35	18.4742	18.4242	20.0376	19.8346	19.9058	20.6162	21.306	20.9836	21.2142	22.2342	22.1786	22.7008	23.1077	24.0683	24.9237	25.9889	26.2667	25.5165	26.5323	26.9927	28.8401	29.1845	28.8487	28.821	30.0889	30.8881	33.0809	34.7696	34.8814	36.0951	36.9148	38.5992	39.6323	41.1027	39.8705	42.229	45.2646	47.1734	48.5289	47.7367	49.3432	49.1449	50.1634	51.7529	54.582	54.4802	53.4331	55.953	58.2863
36	18.4905	18.8207	19.2911	20.2139	20.5043	20.7351	21.3188	21.2404	21.729	22.0003	22.2424	22.2778	23.6334	24.0598	26.396	26.3903	26.8094	26.9032	27.3405	28.0275	28.4239	29.6116	29.589	28.758	30.5195	31.7837	31.6097	34.787	36.143	37.2987	39.3356	39.3398	41.077	41.8503	42.8044	43.6243	47.0085	49.6232	50.5169	49.4817	52.9544	53.7849	53.1398	54.2141	55.7519	58.0371	57.792	58.7781	61.7967
37	19.3059	19.7058	18.6314	19.8478	19.9783	20.4324	20.9836	21.5287	21.7445	21.7277	22.483	22.6895	23.6766	25.2798	25.629	26.8188	28.4276	28.9775	29.2504	29.8565	29.4167	31.2879	31.1888	30.6073	33.0551	35.1572	35.2624	36.5706	37.4594	38.8423	39.9961	40.7902	42.8037	44.6181	45.29	46.4731	49.063	50.5668	51.9918	53.1817	55.6169	55.1241	55.0895	56.3131	58.0399	59.154	61.3067	60.9364	63.0811
38	19.0421	19.728	18.7011	19.6731	20.7558	20.9424	21.4981	22.0478	21.6959	22.4309	22.6712	23.6363	23.716	24.9952	26.8281	27.6792	28.0343	28.9295	28.6257	29.3508	31.6238	32.475	32.6639	32.3402	34.8134	34.9445	36.588	38.1318	38.3534	39.6949	40.7638	43.6387	44.996	46.0409	47.9609	49.6454	51.5177	53.5433	54.8531	54.8319	55.8389	56.7581	58.374	58.6364	60.4729	60.7876	65.3427	62.705	64.8218
39	19.3148	19.8557	20.1973	20.2455	20.5515	21.508	22.3274	22.1256	22.7693	22.7763	22.6917	24.3801	24.5131	24.811	26.9661	26.6668	28.7636	29.3154	29.3304	30.4219	31.5638	31.9001	33.9298	34.9838	34.3158	37.1038	38.5043	39.8683	40.2208	41.7947	42.612	43.4588	45.2204	47.0849	50.2316	51.0504	52.927	55.1874	57.5053	58.093	58.5099	59.3465	59.5277	62.0501	63.6238	65.4866	68.5359	69.3125	68.8884
40	19.6607	19.8197	19.7621	20.9512	21.5931	21.9054	22.5842	23.3408	23.5728	24.1982	24.1382	24.4396	25.8766	26.073	26.7505	27.7833	28.3405	29.2536	30.3588	31.7113	31.8514	32.9939	34.2055	35.3611	37.265	38.6084	41.2264	41.2902	42.0782	43.6222	46.4471	46.0019	46.8279	48.1976	51.8341	54.1927	54.8969	57.3282	58.0719	59.538	61.438	63.3994	63.4386	64.012	66.2242	70.2345	71.6263	72.0448	72.606
41	19.5288	19.6342	20.0987	21.8523	22.4356	22.1911	23.5758	23.9689	25.4135	26.2867	26.2961	25.9541	27.0984	27.588	28.3269	28.5357	28.8967	29.8473	30.1946	32.0819	32.7717	34.3309	33.9288	34.7894	36.1328	38.0162	40.7241	42.0703	43.995	44.3818	46.5458	47.6336	48.3015	50.4084	52.5418	54.4307	56.5769	58.9909	60.7668	61.7092	63.8417	65.1563	67.0512	68.725	70.0913	71.2625	72.0822	73.2132	74.4738
42	19.8829	19.7935	21.3392	22.0005	22.5316	22.7191	23.3919	24.0563	24.7196	25.382	26.2856	26.8871	28.4635	28.6766	28.78	29.5737	30.0564	30.4941	32.1455	31.5005	34.1853	33.9443	34.0854	36.5671	37.1267	38.9068	40.9968	43.7106	45.996	47.8093	47.3284	48.4009	51.1923	51.5675	52.7736	56.0912	58.4995	59.3078	62.1327	64.9552	66.4559	66.4403	67.815	70.1449	69.997	72.7751	72.9451	74.7637	74.6966
43	20.4015	20.9144	20.3181	22.1939	22.4176	23.1129	23.6221	25.4818	25.8246	26.1885	26.5927	27.0415	28.4737	29.4158	29.1898	29.6542	29.9496	30.3389	32.3009	32.6189	33.9506	34.5677	35.4272	36.8924	36.5538	39.4385	41.3546	44.376	46.7545	47.6913	47.6673	49.8365	52.331	53.8963	55.3171	57.9852	59.7607	60.4462	62.6823	65.1285	69.1378	70.152	68.6014	71.1807	72.309	74.9742	74.8562	75.7462	74.7796
44	19.261	20.8773	21.0544	22.0264	22.1573	23.9601	24.1722	25.4519	25.8197	26.5337	27.9154	28.0674	27.972	29.2028	30.4648	30.5855	30.5338	31.1654	31.0295	33.4347	34.4343	35.0099	35.9995	37.0326	38.4283	40.4001	42.5654	45.0501	47.9584	48.6829	50.1147	52.669	54.3432	55.3264	56.6929	57.4927	60.1036	61.3138	63.5523	65.2192	67.822	69.2282	70.1163	73.9331	74.6517	75.6439	75.9071	75.5931	76.0015
45	19.3602	20.78	23.1815	22.8719	23.7237	25.2622	25.5206	25.6096	26.1325	26.3235	28.1918	28.6354	30.6258	29.7806	29.971	30.6169	31.5565	31.6644	31.8832	33.0876	34.5499	35.6625	35.6327	36.8552	39.5699	39.402	41.7041	46.1317	49.3397	50.265	49.7524	52.7502	55.2886	57.128	57.7858	59.5421	61.5596	65.2348	64.2733	67.0396	70.6278	70.3752	71.3701	73.5637	75.8978	76.041	76.5962	77.667	76.8265
46	20.0339	21.182	22.5931	23.8795	24.5199	24.3725	25.1837	25.8181	26.1863	27.2081	27.4989	28.3532	29.5735	29.8906	30.0689	30.7041	32.968	33.7016	33.9807	32.8919	34.0068	35.5318	35.6346	37.8166	40.7507	43.1013	44.0413	46.7104	48.7597	51.2404	52.1143	53.3772	56.8431	58.3703	59.8574	62.1284	63.5493	65.8144	67.2849	69.346	71.3585	72.7568	72.3295	75.0897	76.4055	77.6606	79.1758	78.6996	77.7619
47	19.962	21.8251	21.2327	23.3432	23.7679	23.9525	25.0939	24.8132	25.1768	26.1572	27.038	28.2704	29.1226	30.8559	30.5726	32.2411	31.9366	33.6439	34.1815	33.7494	34.4295	36.5273	36.744	38.2216	41.3187	44.0505	46.429	48.1111	49.0411	52.039	53.054	55.0873	56.632	58.2085	60.9441	64.4125	65.6551	68.6651	69.1368	72.3636	73.1287	75.8003	75.2092	77.0242	78.8624	78.6302	79.2257	78.0776	75.5454
48	20.2519	22.0753	22.935	23.1498	24.3455	24.9878	25.6049	24.6563	25.6066	25.6282	27.4831	29.0138	29.9455	31.4951	31.7889	32.2616	33.849	33.7945	35.1118	35.8191	35.5118	37.2015	37.7212	38.9586	41.7352	44.5732	47.5123	49.0298	50.0114	51.6608	54.4816	54.6989	56.4181	58.5551	62.7701	64.3061	67.7233	68.5474	69.9321	72.4835	74.9954	76.3156	76.5611	78.9674	79.3919	80.3689	79.1465	77.5641	75.5924
49	20.8099	21.3377	22.8487	23.6904	24.4391	25.4977	24.8093	25.8989	27.4301	27.8795	29.0197	30.275	31.187	32.0585	31.4714	32.0255	34.2335	35.9934	35.3242	35.7033	37.38	40.3254	40.8339	40.9772	42.4158	44.829	46.8827	50.0252	52.0386	53.1848	55.3612	56.7074	58.7305	61.968	64.7784	65.9059	67.6859	68.8605	71.3845	73.0963	73.9189	75.4774	77.0004	78.6546	79.2359	78.7437	78.5903	77.0216	73.8964
50	19.6184	20.9864	22.0202	23.1094	23.4142	24.6563	25.6556	25.7151	26.6127	27.8091	29.069	29.099	30.4435	31.5853	31.3863	31.3232	34.0807	34.6761	34.0309	34.6135	35.7643	39.7182	41.5531	42.995	43.2778	45.5665	47.3655	48.3006	50.2912	52.3118	54.1009	56.8427	58.074	60.8195	63.6413	65.4499	65.8382	67.9947	71.4646	73.7968	73.6927	74.5881	76.8356	77.9726	79.7601	77.7444	76.2771	74.8256	70.8114
51	20.3856	20.2821	21.6441	22.9849	23.2543	24.0231	24.5943	26.5392	26.7755	27.5886	28.9608	30.0352	30.1523	31.7581	32.084	32.1628	32.5595	34.3469	34.5068	35.7269	37.487	39.6719	42.1189	43.949	44.493	47.0814	47.7783	48.3161	51.1982	50.9893	52.3091	56.9667	58.7937	61.2687	62.1665	64.6219	65.3807	67.7076	71.6572	73.8749	75.1622	76.8591	77.3004	77.0739	77.3751	76.8712	75.3146	73.1977	68.0497
52	21.0345	22.833	22.26	23.6639	24.3782	23.8473	23.5692	24.3824	24.9963	27.0515	28.3963	29.6241	30.9448	31.429	31.8473	32.2324	32.5669	34.3773	36.2165	37.6129	39.6119	39.7462	42.4798	43.9667	46.7583	47.4919	47.7318	48.7657	49.4196	51.5561	53.7969	56.5103	58.8009	62.9112	62.8397	64.3892	66.4459	69.8496	73.2305	76.5138	75.906	76.7921	75.7361	75.3754	76.8198	74.2653	73.2066	71.3248	66.8803
53	22.0197	22.8049	23.0832	23.8714	23.9106	24.5259	24.5403	24.7436	25.3714	26.6121	27.7197	29.7481	30.8624	31.7018	31.6744	32.2289	32.783	35.1257	36.9478	38.5823	39.5986	40.2018	41.8353	44.888	48.4306	48.7527	48.9767	48.8016	51.7074	52.7815	54.1125	57.4628	58.9226	63.233	64.4893	65.6067	68.1005	70.6124	75.0017	77.0628	76.6235	77.6646	77.6063	75.944	76.242	75.3935	73.1203	68.7952	65.8291
54	22.23	23.0093	23.7242	23.8714	24.998	26.491	27.027	27.541	26.6255	28.2921	28.8368	30.1765	30.9224	31.6027	32.3316	32.4199	33.5614	35.0854	35.7204	36.703	38.3304	39.8663	40.7657	43.4051	47.5016	48.5873	49.6779	50.6858	52.3639	54.4165	55.7156	57.1018	60.032	63.4288	65.5377	67.5682	70.2076	72.9309	74.8697	75.9499	77.6867	78.0056	77.2032	76.102	76.4574	75.1497	72.6657	67.6541	64.4352
55	22.0734	22.7735	23.0842	23.4595	24.1986	24.9561	26.1441	27.5354	27.3872	28.2603	29.3497	30.0799	30.4459	31.105	31.5985	32.0389	33.2374	34.3923	36.1618	36.6771	37.5072	39.4582	40.916	43.2786	45.7651	47.0769	48.4931	51.7076	53.6121	55.4264	55.2132	57.2216	60.7336	62.6986	64.9502	67.5879	69.3231	70.7857	71.5952	73.4806	76.1557	77.6976	76.1229	75.5039	74.4963	72.5436	68.7462	63.9629	61.5041
56	21.6558	21.9724	23.4909	23.9561	23.8717	25.2229	25.6288	26.4017	28.0306	28.7601	28.8456	29.3836	30.259	30.9637	32.072	32.9026	33.3877	33.6879	35.5428	35.3691	36.5071	37.223	39.1524	40.4076	43.5613	44.9971	47.8492	52.2431	52.9374	54.7399	55.587	55.1721	58.5703	60.1087	63.882	66.7503	70.0279	72.0623	72.0571	72.8156	74.4426	74.6079	74.3767	73.7554	70.9439	68.9322	65.1881	62.286	59.0893
57	21.586	21.8302	22.7196	22.2174	23.5337	23.9057	25.7604	27.5074	27.7232	28.4922	28.6827	29.6403	30.3645	30.9636	31.7996	31.8148	33.4761	34.0721	34.9195	35.28	35.4635	36.6051	36.91	37.624	41.9028	43.4137	45.9448	48.7319	51.0807	51.7847	54.9437	57.098	60.2665	62.3337	64.1742	67.2446	71.2004	72.3661	71.7712	74.281	73.137	74.0448	75.0132	75.0913	71.9955	66.6114	63.6687	60.1571	54.7012
58	21.4732	21.9721	21.9278	23.1458	23.7513	24.3954	25.2224	26.2408	26.5026	27.0496	28.4692	28.8979	30.5171	31.1136	31.7426	32.5096	33.6362	34.7641	35.2105	35.6338	35.7165	37.0865	37.6316	40.1998	41.8463	43.367	44.9609	48.2614	50.5403	52.5335	56.302	59.308	61.7513	63.6878	64.7163	68.4604	68.8399	70.2609	71.6959	74.4912	74.9899	75.3255	75.7066	73.9896	71.3716	68.65	63.0921	60.0259	54.1904
59	21.4332	22.0316	22.6511	23.6882	24.0474	24.1868	25.3298	25.8111	26.2984	27.6154	28.5545	29.7104	30.4019	30.7775	31.2944	32.0064	33.3927	34.7563	35.8307	36.0496	37.4359	37.9025	38.6085	39.9141	40.6018	43.3078	45.1237	46.6553	49.2896	52.5239	55.3223	59.2217	61.9528	64.2483	65.1592	67.6709	70.2304	70.7968	73.0217	73.7171	73.2648	74.1554	74.6545	72.4695	69.8867	66.1711	61.5765	58.1216	53.2696
60	21.2329	21.8645	22.5497	23.0578	23.7102	24.0896	25.3304	25.5064	26.2107	26.6818	26.7782	28.4777	28.3193	30.1748	31.3113	32.2279	32.3097	33.4427	34.2514	35.3033	36.2665	36.9698	37.6262	39.8474	42.0025	43.1997	44.7848	45.8141	48.5048	52.2259	54.1357	57.1726	61.0669	64.0066	65.4815	68.2032	71.5457	72.3841	74.0885	75.5419	73.5166	73.4783	72.9715	71.5363	70.9838	67.2572	61.9848	57.9894	52.4769
61	20.6794	22.039	22.8114	23.085	24.3479	24.4275	24.534	25.2447	26.2424	25.6832	27.0326	28.1542	28.0757	28.0927	30.7562	31.9479	32.3125	33.3565	34.7456	35.7503	36.0245	38.1279	38.954	41.2452	44.0915	45.5897	47.7246	49.0524	50.2858	53.4315	55.3053	57.9484	62.3233	62.9793	63.5938	66.6024	68.8278	71.8822	71.9534	74.0443	74.3986	74.4001	72.432	71.5655	70.9888	67.6173	61.81	56.8065	50.5574
62	21.6673	21.9485	22.2049	22.0822	23.1511	23.2788	23.6797	24.2508	24.2062	25.4658	25.4369	25.7404	27.4332	28.5652	29.1551	30.9061	31.7281	33.7914	34.5163	35.2546	36.0608	36.8544	38.7421	40.1266	43.7305	46.4684	48.2459	50.3519	50.0736	51.6301	54.5654	56.3661	59.8314	61.4109	63.2366	65.5971	69.0392	69.0932	69.2354	72.9667	73.5331	72.4371	72.6878	72.7429	70.2216	66.3318	60.6997	57.0276	51.8357
63	21.6602	22.1263	21.7362	22.1489	21.6628	22.5399	22.8617	23.5745	24.5099	25.2412	25.5753	25.2778	27.036	27.8452	28.4929	29.2237	31.674	33.6158	34.3092	34.9633	36.1011	37.4086	38.6062	39.5002	42.3558	44.8108	47.9705	50.8414	51.822	52.8347	54.5182	56.4684	59.6489	61.0652	63.6931	65.7737	67.5066	69.2212	70.5456	72.4918	74.0252	74.7526	73.5734	72.7626	69.9302	67.1892	64.4503	58.1318	52.8676
64	20.6359	20.6588	21.3002	21.3436	22.1781	22.3667	22.8941	23.1273	24.3971	25.0906	25.1203	25.8126	26.3064	26.9483	27.693	28.0463	30.6649	32.1965	33.5643	35.1636	36.3898	36.9178	38.3632	40.9397	42.9735	45.0403	47.5562	49.2817	48.9514	50.3344	53.7468	56.2224	58.232	59.951	61.6367	65.2446	66.8052	67.9626	69.9235	71.4792	72.8217	75.245	74.245	71.0578	68.4206	66.5827	64.7028	58.8815	54.5472
65	19.2724	20.3199	21.0192	21.5166	21.7552	22.1458	23.2096	23.7656	24.6698	24.1681	24.9816	25.3495	26.6422	26.4606	28.4839	29.7406	29.8257	32.8408	33.2555	34.2486	35.173	35.7226	36.1631	39.3434	42.0174	43.5847	44.5593	47.8051	48.4981	49.8069	50.5628	54.9748	57.5649	58.8981	60.7453	62.9603	65.2593	66.8265	70.4973	71.7484	72.2008	73.3982	70.7894	68.6744	67.4796	66.2511	63.1372	60.0215	56.031
66	19.0884	19.3582	20.2465	20.3697	20.3679	20.7855	22.4687	23.3671	24.3425	24.1677	24.7922	25.2731	27.5548	28.0659	28.4279	29.7414	30.7268	31.8424	33.6778	33.8404	35.0206	36.9563	38.2454	40.1786	41.561	42.3342	43.861	45.5608	48.1565	49.8057	50.5073	53.31	55.4665	58.9033	60.5961	64.5185	65.8865	67.824	69.2674	68.9045	68.7966	71.1145	70.4288	69.1833	69.2352	67.3782	63.3087	60.0155	56.1765
67	18.867	19.4051	19.7183	20.6995	21.688	22.5419	23.4192	23.7258	24.039	24.663	25.7335	25.8843	28.1303	28.5948	29.2986	29.8738	30.5561	32.5671	33.5782	34.5797	35.6124	38.3302	39.1564	40.0765	40.4631	41.3838	43.4068	44.0738	47.8668	50.4131	51.3641	53.866	56.5229	56.7049	59.7052	62.325	63.7816	65.8317	67.3729	67.601	68.094	68.3517	70.4841	70.5558	69.3117	67.1874	63.9641	61.289	57.5171
68	19.8297	20.3154	20.1357	21.2916	22.2311	22.8732	23.2649	23.598	23.9097	24.6904	24.4664	25.0487	25.6694	28.0488	29.603	29.6388	30.7613	32.268	33.268	33.8206	35.142	37.5463	39.3684	41.0962	40.8132	41.2634	43.9628	46.1108	48.962	49.5583	51.0444	52.0618	54.179	57.1552	58.1707	61.5568	63.1759	64.9458	65.9823	66.6014	67.1635	67.9003	69.59	70.2527	69.4921	67.7342	64.395	62.4875	59.298
69	19.607	19.5812	19.9087	21.0714	22.261	22.6758	23.1419	23.1469	23.5478	24.4896	25.0936	25.7876	26.758	28.0566	28.0677	28.7542	31.0231	31.8293	32.4414	34.0449	35.5009	37.5062	39.3819	40.955	41.5096	41.4735	43.3504	45.9478	47.5038	49.5932	49.9055	50.9602	50.9794	54.4877	59.7753	61.2026	61.469	64.0211	65.52	66.5591	67.2531	67.6009	70.6404	69.0288	68.6166	67.8624	65.1244	62.4897	60.1236
70	19.9854	19.9555	20.4123	20.8133	21.6946	22.4672	22.1819	23.1698	23.5007	24.118	24.7828	25.5046	26.031	27.4117	28.5242	28.6051	30.0064	30.5789	31.0431	33.551	34.8057	36.9328	38.0366	38.483	39.1731	40.4241	41.86	43.9929	46.5314	46.4578	49.3056	48.4861	49.1865	52.9994	57.0926	59.1403	59.2774	62.8232	65.1256	67.1368	68.0086	68.5614	69.5978	69.0753	70.109	69.0505	66.439	64.0457	60.3967
71	19.2565	19.9434	20.7769	21.416	21.4051	22.6994	22.0715	22.4348	22.6064	22.8866	23.9207	24.4533	25.4746	26.1801	26.516	26.847	27.4051	27.8932	30.9375	32.3541	33.0694	35.6854	36.3425	38.1223	37.7525	38.9935	41.1115	42.5726	43.8514	46.1791	48.0535	48.4234	49.903	52.6148	53.9305	55.8775	58.3871	61.5771	64.7932	64.8967	66.3682	68.9457	68.7734	68.2451	67.2019	67.2731	67.4074	65.4886	60.3702
72	19.148	19.2665	20.4689	20.7391	20.8687	21.1754	22.1125	22.5658	22.2292	22.571	22.9555	23.8411	24.2064	24.832	25.9101	25.9902	27.5584	28.9993	29.642	30.4012	32.1956	34.5635	37.3228	35.8815	37.1355	39.2997	40.3551	41.8199	44.4559	46.9221	47.5361	48.0786	48.8033	51.4016	52.8994	54.6873	56.0355	59.2774	62.4809	64.0075	66.8977	67.5403	68.596	66.8962	66.9627	66.5068	66.7813	64.8319	61.9266
73	18.5284	19.1416	19.6843	20.1474	20.1979	20.974	21.5753	21.5904	22.3442	22.0424	22.9701	23.8152	23.6399	24.6024	25.1691	25.8354	26.4038	27.184	28.9036	30.7231	31.1417	32.2789	33.9892	34.8861	35.6426	36.7478	38.4488	40.967	44.5391	47.3846	47.2017	48.0165	49.4135	50.3199	54.2412	53.7738	54.6394	59.0705	61.4352	63.5935	64.9263	66.7603	66.1234	66.2991	66.5812	65.9141	65.286	63.7662	63.0356
74	18.2125	19.1244	19.017	19.9345	19.4364	20.5965	20.2931	20.7225	20.2696	21.3321	21.7835	22.0082	23.0547	24.0801	23.7403	24.516	25.3451	27.3117	29.0645	30.2873	30.9643	32.3182	33.2352	33.2724	35.3246	36.2373	38.0531	41.4484	43.2623	45.6038	44.864	46.595	48.1554	48.7451	52.2089	53.025	55.4723	58.619	59.0635	61.4729	62.8538	64.1509	63.9846	64.0849	65.1735	65.7227	65.6848	63.4361	62.7021
75	17.6378	18.3737	18.8396	19.1881	19.5145	19.1884	19.5351	20.4334	20.9098	21.037	21.3888	21.2723	22.2339	23.4801	23.6955	24.9919	25.728	27.0513	27.9396	28.9904	29.4084	29.659	31.0522	31.5309	33.7392	36.0796	37.6046	41.5762	42.0856	44.0624	45.2692	46.0685	47.1692	47.8167	49.8057	52.0238	53.3912	54.4216	56.9486	59.0992	61.2281	61.3286	63.7178	64.2562	62.5207	63.185	63.7237	63.9192	62.9421
76	17.6875	17.7746	18.0492	18.2356	19.4615	19.8028	19.8226	20.2966	20.723	20.7074	21.6004	22.0787	22.4194	22.8617	23.7002	24.7538	26.2943	26.9062	27.5629	27.368	29.1603	29.5624	30.0051	32.4279	33.041	35.6833	37.3212	38.5956	40.8063	42.0471	43.5581	43.2397	45.8526	46.3921	47.6867	49.6761	51.2349	54.2481	54.9444	57.1485	58.4304	59.4405	61.6805	63.3132	63.1424	60.5392	62.4137	63.2293	63.4827
77	17.0526	16.2794	16.7051	18.9213	19.2184	18.7456	19.4042	20.3799	20.8224	20.7993	20.8644	21.7579	22.2541	22.4548	24.0941	25.2718	25.9637	27.4061	27.5033	27.6385	29.5804	29.5006	29.6019	31.5046	33.3696	34.9605	36.2619	36.707	38.6667	39.9976	41.8788	43.3954	45.9973	46.0643	47.1097	47.8113	48.9293	52.3529	53.1059	54.8587	56.1068	56.9964	59.8158	62.3603	61.4265	58.5666	61.2219	62.6819	61.0617
78	17.2416	16.2863	18.2512	18.157	18.2068	18.3078	19.8622	19.6691	20.2859	19.8965	20.1429	21.3145	22.0551	23.3162	24.4984	24.4283	24.695	26.7064	27.873	28.4132	28.9137	28.9091	29.4777	31.6514	33.8108	34.0761	33.7705	35.0997	37.766	38.0405	39.6997	41.1478	43.5816	43.9428	45.2908	45.6947	47.5522	49.2997	50.6903	52.1909	54.3368	54.117	57.57	57.9755	57.1105	57.7745	61.2247	60.5471	60.5703
79	15.3167	16.8667	17.6886	17.0291	17.2024	17.6205	18.2987	18.9854	19.7144	19.7421	20.5856	21.6849	21.639	22.7575	23.8169	24.4811	25.0801	25.1947	26.4394	27.7356	28.4769	29.0516	29.7454	32.0218	32.3815	33.6572	34.8174	35.9337	35.9797	36.7079	38.0533	39.9804	42.8087	42.6746	42.3278	42.6361	43.1547	45.7032	48.9853	51.4961	52.5343	53.2836	54.0097	53.5327	55.1531	56.1295	57.5809	58.7097	57.8192
80	16.0124	16.9663	17.0888	17.3715	17.4777	17.9561	18.4697	19.1526	19.3329	19.7939	20.0119	20.4929	21.5764	21.9561	23.4096	24.4237	24.1391	25.5159	25.8789	27.663	27.954	28.3487	30.0595	31.0307	31.2175	32.4007	34.543	34.7546	36.0851	36.4596	36.6719	37.1822	40.6815	40.7178	38.8739	40.9567	42.1308	44.4852	46.7519	49.6276	51.116	52.1606	51.1755	52.0781	52.2047	53.7886	54.9182	55.1617	54.8291
81	15.055	16.6326	16.9047	17.4559	17.5576	16.909	18.6165	18.3375	18.0772	19.2706	19.2817	20.6634	21.5915	21.5799	22.5874	22.6248	23.8113	24.9197	25.9066	27.7446	27.125	28.3163	29.5597	29.5588	30.8157	31.438	33.0456	32.9857	35.2731	35.3917	36.7477	37.2783	38.5689	38.2421	38.9463	39.0868	40.2752	41.527	43.8448	46.824	48.846	48.6943	48.8865	50.5485	52.1418	51.2244	50.8384	51.4623	52.886
82	13.7237	15.6793	16.9841	16.9907	16.6086	17.6358	17.6607	19.1724	19.2221	19.5083	19.6999	19.7888	20.5389	21.6927	22.3118	22.1932	23.1887	23.4498	26.1466	26.8851	27.3889	28.6901	29.0959	27.9022	27.9178	30.5061	30.8787	31.6998	32.9526	34.4717	34.8079	35.3112	36.4418	37.1508	36.3951	37.2764	38.84	39.6255	42.5347	43.4188	43.499	44.5748	47.1537	47.3893	49.2051	49.7265	50.656	51.1167	51.1922
83	15.1454	15.1957	15.7184	15.848	15.0101	16.447	17.4055	17.606	17.6679	18.4616	19.1987	20.377	21.5249	21.4721	20.8376	22.1354	23.3565	24.678	25.5145	26.1232	27.2876	28.8842	28.1865	27.2006	27.5776	27.9633	28.7855	30.6651	31.608	32.6816	33.4599	34.6835	34.0047	35.7961	35.3518	35.2522	36.3633	37.3105	40.6842	41.8332	41.4444	42.3916	43.699	45.7817	47.2883	46.5737	47.0219	47.185	47.3802
84	12.0129	12.8746	14.0226	13.2543	14.4984	15.2145	17.3015	17.6049	18.1467	18.5396	19.3755	19.5461	19.8475	20.4932	21.428	22.8613	23.5364	25.0147	26.2947	26.6318	26.6764	26.354	26.3806	26.102	25.6425	26.1983	28.6495	30.3836	30.0047	31.9599	32.1952	32.3166	31.9908	33.105	35.4175	35.2408	36.6957	35.4109	37.8008	39.4078	40.1192	40.6826	41.5357	43.6994	44.3561	45.8096	45.3447	45.1515	43.812
85	11.987	11.8794	12.5352	15.4536	16.5391	15.3364	16.4665	16.7155	17.8007	18.5181	18.7511	17.3924	19.041	19.711	21.7523	22.1658	23.833	24.9532	25.7643	25.1189	25.6567	24.7753	26.1393	26.5451	25.6696	26.3465	28.708	29.7179	29.8591	30.2304	31.0672	31.0142	31.5996	32.759	31.3581	32.9766	34.6272	35.8322	38.2947	38.4721	38.6264	40.6657	40.2522	40.2255	41.761	42.0173	43.0845	42.5667	41.1238
86	12.2308	11.2724	12.6052	14.9108	13.5998	14.8419	16.9532	17.7855	16.9692	18.6355	18.057	17.9776	18.5253	20.2751	21.6919	22.1838	24.2548	24.131	23.6231	24.3645	25.0861	24.7856	25.9511	24.4543	25.8829	27.3616	27.9365	29.0256	29.8133	29.6331	30.1551	30.8638	31.0246	29.9804	30.6933	32.5076	33.5023	35.1047	35.3628	35.6269	38.147	38.4332	37.414	38.1639	36.375	37.6954	39.8554	40.3047	39.7915
87	8.74697	10.6727	11.7971	12.2736	14.0071	13.7567	14.6241	15.4085	15.8376	17.3981	16.7053	18.1888	19.2912	20.7685	21.1507	22.42	22.9394	23.8162	22.9964	23.2003	23.4114	24.1215	24.2344	23.9409	25.7677	25.5761	26.9916	27.5024	28.1035	28.9763	29.6499	29.4697	30.2702	30.0787	31.0969	31.3195	31.9749	32.4145	34.7358	34.5049	34.6641	36.6577	36.3343	36.1333	33.858	34.5667	37.4301	36.7351	38.295
88	9.30422	10.4573	10.2293	10.0925	9.73451	12.0895	12.213	14.4376	17.2648	18.2096	18.8755	18.8415	19.3375	19.6469	21.0304	21.8769	22.8008	22.7826	22.2662	21.6798	22.5705	22.0024	23.3491	22.4566	23.8337	24.7062	25.3734	25.5793	26.8755	28.1931	27.7984	28.2493	27.7495	30.2138	30.2731	29.8455	31.162	31.6006	31.5301	32.6832	33.7976	33.4395	33.548	31.6993	33.2212	33.4675	34.4916	35.9186	36.1146
89	8.47003	8.616	8.42828	10.2589	11.3005	14.4143	14.7514	16.8716	18.3288	18.5007	18.6029	18.7594	19.6577	20.0539	20.712	20.7008	20.6742	21.7138	20.7724	20.7415	20.8897	21.7646	21.4471	22.3379	22.7577	23.9676	24.4487	25.2908	26.5523	27.3122	27.2506	27.4954	28.7662	28.6583	28.7109	29.6221	29.6921	28.5484	29.7176	30.7548	30.8385	30.7636	29.425	28.2989	30.1874	31.3885	31.6635	34.3845	34.2196
90	8.28693	8.04988	10.0498	11.3397	12.5653	15.8748	16.7358	17.8861	18.0641	18.2975	18.3992	18.4693	18.5219	18.1197	19.1263	20.1275	21.0598	19.8887	20.027	21.3338	20.9236	20.5844	20.7651	21.2134	22.7109	23.3963	23.5757	24.7058	24.5948	25.5999	28.2435	27.3962	27.6371	27.811	26.7753	28.3213	27.9385	27.5375	28.4275	28.4837	28.9403	27.8455	26.6707	28.1111	29.2391	28.5906	29.9057	31.7559	32.0219
91	7.45666	7.34763	10.2113	12.9049	12.0487	12.4835	14.4103	17.3871	17.5444	16.944	16.56	16.954	17.4701	18.4159	18.0022	18.8133	19.6672	19.3547	20.4581	20.3404	19.4852	19.9796	20.4754	20.4554	21.0263	21.7004	23.2796	23.5689	24.2668	26.1206	26.1107	27.073	27.387	27.2118	25.3169	26.2279	26.6771	25.7413	25.4441	25.6053	25.4276	26.1286	25.6308	26.8192	27.057	26.5681	28.7234	29.7656	30.9575
92	7.54011	8.44392	9.0413	11.2625	10.3109	13.2185	16.7215	16.5298	17.5042	16.5533	16.2254	16.7306	17.0283	17.0434	15.7248	18.469	19.6302	19.5032	19.7934	19.5783	19.2873	19.3781	20.0736	21.4648	21.5726	21.795	21.714	22.3164	23.9019	25.0842	27.0715	25.595	25.9043	25.8189	24.7612	24.5738	24.9492	24.4497	25.3536	24.512	23.2803	23.2034	24.0135	24.4329	25.288	25.0379	27.3458	28.3277	29.913
93	7.8162	8.36397	9.30493	11.5088	11.065	11.0384	15.4595	16.4974	16.468	16.3069	14.8688	15.5789	14.905	14.9888	16.3207	15.8058	18.2331	19.5477	18.5307	17.5542	17.8033	18.373	19.4551	21.3243	22.153	22.5028	20.8507	22.5039	23.3568	24.4675	26.9654	23.3107	24.3295	24.2446	23.754	23.2141	23.6811	22.7069	22.2504	22.8278	22.2218	22.5545	23.5392	23.5073	23.4846	24.0352	24.5818	26.5991	26.2538
94	7.7579	8.37658	7.88808	9.82617	10.5331	12.9844	15.3706	15.9587	15.843	16.0467	12.4658	13.0853	12.3377	11.3819	11.5021	13.3222	17.4834	17.8514	17.168	16.3237	17.2742	16.332	18.7709	19.345	18.4569	20.5698	20.4823	22.326	22.5284	23.2719	23.0895	23.1581	22.8142	22.7166	22.1043	22.8657	23.1938	22.648	21.3878	21.2125	21.1766	21.4577	21.9056	23.0476	19.3369	20.7667	24.151	25.2023	24.8709
95	7.32661	7.34535	7.82561	9.19443	10.268	13.5356	14.1525	14.3394	14.4927	12.5082	12.3236	10.7148	9.00179	10.0018	10.9497	13.0111	16.527	16.1121	15.4013	15.5292	13.806	14.5755	14.2222	16.9608	18.6263	19.6378	19.8749	21.6752	22.2709	21.5179	22.2245	22.0412	20.5395	21.5432	22.0912	23.3361	22.1183	20.3942	17.679	18.8692	20.5809	19.7565	21.3058	18.9845	16.1432	16.8178	22.7084	24.1686	24.0689
96	6.89814	7.18786	7.08468	8.38096	10.1913	13.9567	13.1383	10.6594	13.7941	10.6783	9.2473	8.89378	9.03986	9.30878	9.39894	10.3901	11.8046	11.7594	13.0561	11.1007	10.7037	11.4414	12.3861	13.3242	18.4513	18.6925	19.8823	20.5968	20.6241	21.1696	20.6632	19.3758	20.4117	20.7623	21.025	21.107	18.4547	16.5091	16.091	16.1434	18.4154	17.8392	19.7962	17.491	14.717	16.2672	20.6708	23.512	22.0757
97	6.68648	6.25844	6.64461	9.06504	11.0783	11.5675	10.0271	9.95002	9.55762	8.75294	8.84483	8.84483	8.71043	8.67487	8.92639	9.38584	9.81458	10.478	9.63604	9.58083	9.89172	10.0463	11.6929	12.8586	15.7104	15.771	17.1406	18.7179	18.7607	19.2419	19.061	18.4675	19.1442	19.9933	19.7883	19.2398	17.129	15.0936	14.6938	15.3414	14.5738	15.8728	17.5839	14.9302	14.5239	15.888	18.5259	20.365	18.2573
98	6.19436	6.15317	7.27813	8.19983	8.77634	8.01013	8.37754	7.94334	8.06878	8.68585	8.59199	8.72973	8.38511	8.24985	8.68571	9.19549	9.35377	9.35434	8.84514	9.36531	9.88464	10.3565	11.0915	13.6483	13.7474	15.6408	15.3622	16.6951	17.7616	15.8769	17.7786	18.4354	17.9279	19.133	20.0518	18.6621	13.8184	14.1584	13.4296	12.8273	12.9305	13.0275	14.9164	13.2022	13.657	14.7985	15.4075	16.6678	16.6191
99	6.37646	6.67442	6.53807	6.72731	7.11529	7.2579	7.58769	7.76897	7.91434	8.01376	8.4746	7.94758	8.17417	8.22043	9.12498	9.30056	9.06672	9.13791	9.17778	9.10108	9.38553	10.9395	10.8452	12.3517	13.6761	12.4835	14.2461	14.6005	14.6891	15.2292	16.3335	16.031	17.2248	16.8002	16.2736	14.1382	12.8389	12.5249	12.6205	12.3937	12.7493	12.4811	12.8763	12.3081	12.7108	13.8537	16.6871	17.0776	14.9706
100	6.06832	6.36337	6.26138	6.47787	6.75444	7.31443	7.47274	7.76305	7.87051	7.89855	7.94789	8.19574	8.01515	8.59653	8.80169	8.78855	9.0328	9.08375	8.9538	8.89526	9.37434	10.159	10.5512	11.5107	10.7183	11.1831	11.1798	11.3725	13.3262	14.9945	16.3919	15.8813	13.1696	13.2629	12.5257	12.2574	12.215	12.5247	12.2225	12.3241	12.2143	11.9759	12.2476	11.6637	11.8258	12.9979	14.7271	14.1948	12.9942
101	6.16211	6.07781	6.282	6.79313	7.11747	7.08964	7.41855	7.60255	7.65223	7.70444	7.80311	8.05981	8.23015	8.78632	8.55074	8.55207	8.95566	8.81052	8.76977	9.0623	9.18505	9.67218	9.8365	10.3837	10.19	10.3184	10.5623	11.7927	12.3976	12.7496	12.2551	12.7404	11.0744	11.6196	12.1624	11.0994	11.9532	12.5247	12.3578	12.4229	11.9222	12.0442	11.9072	11.5937	11.8885	13.0185	14.7514	13.3036	12.5774
102	6.03537	6.03405	6.18786	6.96056	7.00864	7.28462	7.15315	7.29728	7.66802	7.53317	7.60442	7.9697	8.35513	8.18572	8.30141	8.71483	8.96778	8.66921	8.78887	8.67721	9.2443	9.48443	9.59943	9.9107	9.70053	9.76153	9.995	10.0846	10.5623	10.2581	10.3723	10.0502	10.8724	10.5355	10.6117	11.4164	11.6623	11.8935	11.3707	12.3138	11.1927	11.2801	11.3118	11.2755	11.4199	11.8597	12.6356	12.4797	12.0411
103	5.99487	6.34006	6.71095	6.87956	7.04603	7.02618	7.15758	7.2298	7.35436	7.59665	7.83631	7.99545	7.8184	7.7479	8.53728	8.51103	8.49398	8.39197	8.60491	8.97323	8.91304	9.35601	9.676	9.48197	9.67936	9.04394	9.58041	9.55594	9.84447	9.92279	9.31966	9.41144	9.54225	9.95111	10.1256	10.5818	10.8457	10.7142	11.3454	11.484	10.7385	11.2336	11.2822	11.0261	11.353	11.4768	11.9892	11.8022	11.3899
104	6.31505	5.93081	6.47937	6.81342	6.97846	7.00595	7.04845	7.15669	7.32476	7.436	7.59874	7.4076	7.55195	7.87788	8.13539	8.16922	8.18732	8.43582	8.91304	8.80574	8.84882	9.07912	8.73455	9.00698	9.25191	8.90257	9.2841	9.31675	9.54803	9.10584	8.56149	8.92829	9.38083	9.38471	9.68634	9.93302	10.0628	10.5972	11.2049	11.0135	10.6392	10.7793	11.6948	11.0176	10.5532	11.1375	11.3067	11.197	10.935
105	5.84328	6.11086	6.55748	6.90449	7.11991	7.06641	7.12218	7.15431	7.28462	7.68708	7.6403	7.59824	7.47135	7.60343	7.83165	8.1103	8.17159	8.69428	8.60853	8.80574	8.79616	8.58039	8.4816	8.89359	8.80889	8.47013	8.80574	9.31675	8.82695	8.29747	8.68123	9.2263	9.11755	9.27492	9.40817	9.68366	9.88604	10.2721	10.5571	10.7296	10.5685	10.7151	11.1156	11.135	10.9169	10.4222	10.7669	10.624	10.8544
106	6.0344	6.43178	6.85776	7.03725	7.15243	6.94679	7.05111	7.15373	7.24545	7.48753	7.5636	7.42369	7.15464	7.49025	7.76174	7.71634	8.05792	8.45227	8.69	8.60572	8.33712	8.42997	8.35163	8.55374	8.21634	8.45587	8.44799	8.91756	8.57578	8.27073	8.59605	8.71334	8.84235	9.19555	9.18439	9.40011	9.63729	10.1222	10.0353	9.90525	10.2389	10.2499	10.6687	10.6784	10.0967	9.84814	10.2916	9.93147	10.1689
107	6.53713	6.92894	6.91569	6.89808	6.9831	6.76352	6.87064	6.77435	7.0329	7.04969	7.02701	6.91983	7.11122	7.27026	7.60128	7.57089	7.77079	8.30376	8.56565	8.04083	8.16764	8.06176	7.86332	7.63819	7.50532	7.65582	8.46609	8.11311	8.11637	8.18991	8.34195	8.68123	8.96887	8.96182	8.96229	9.1655	9.72587	9.50077	9.34946	10.0428	10.2794	10.482	10.0301	10.1082	9.80952	9.94047	9.9566	8.97593	9.19295
108	6.12661	6.49059	6.83635	6.86124	7.03725	6.80292	6.77435	6.67398	6.52141	6.53092	6.52385	6.70333	7.15226	7.43903	7.33579	7.20735	7.68175	7.86084	7.72315	7.80639	7.96978	7.60467	7.23501	7.07693	7.09883	7.87864	7.75049	7.76653	7.60003	7.89843	8.33943	7.90792	8.81418	8.2989	8.97839	8.85093	9.10992	9.11521	8.8269	9.37606	9.37947	9.60327	10.0803	9.91525	9.31792	9.1452	9.0818	8.85585	7.90725
109	6.19565	6.26375	6.89451	6.74331	6.7826	6.79873	6.56399	6.15822	5.88902	6.26941	6.58912	7.03041	7.04723	7.15489	6.71177	7.3367	7.38703	7.77849	7.77842	7.72329	7.68598	7.07476	6.96464	6.73527	6.75985	6.99759	7.44224	7.40132	7.51736	7.71476	7.8053	8.19428	7.91776	8.19185	8.94558	8.28025	8.02466	8.25189	8.03851	8.90936	9.22901	8.9736	9.2829	9.62263	9.07817	8.93776	8.80186	7.97557	8.02248
110	6.1664	6.23619	6.62396	6.76447	6.68373	6.3323	6.12663	5.76697	5.98398	6.18365	6.38183	6.49048	7.02711	6.67242	6.35837	6.75061	7.32701	7.65245	7.57212	7.35086	6.81845	7.20523	6.52441	6.49709	6.6798	7.00373	7.25933	7.36625	7.19213	7.60393	7.90184	8.04295	7.54541	8.19244	8.14562	7.68864	7.53539	7.73092	7.79646	7.92498	8.59714	8.49377	8.54202	8.90915	8.45959	8.5586	8.85585	7.81079	8.21965
111	5.91807	6.16143	6.52045	6.12469	6.28448	5.84364	5.66058	5.71041	5.78483	5.78483	5.8807	6.36654	6.1773	5.8394	6.25612	6.66193	6.64873	6.71159	7.01145	7.13506	6.55654	6.59902	6.07873	6.31432	6.3559	6.60985	7.32334	6.84712	7.03035	7.39967	7.73113	8.0922	7.46949	7.35897	7.05689	7.335	7.21325	7.29574	7.77483	7.52944	7.92962	8.34566	8.09707	8.20885	7.77116	8.34613	8.44742	7.93532	7.66539
112	5.98114	6.33824	6.56852	5.76697	5.56143	5.71041	5.62776	5.4942	5.47664	5.69255	5.59426	5.57008	5.43958	5.71633	5.95609	6.28528	6.45107	6.73351	6.56935	6.4022	5.99703	6.21547	5.98784	6.25027	6.2545	6.30145	6.81378	6.49834	6.8399	7.45876	6.99911	7.76704	7.21744	6.58815	6.58815	6.69661	6.51812	7.14331	7.09969	7.05705	7.35753	8.23624	7.71508	8.30866	7.82787	7.82104	8.264	7.75458	7.3317
113	5.67057	5.81303	5.56206	5.44903	5.51185	5.42679	5.13542	5.2314	5.51377	5.32971	5.01726	5.14036	5.00532	5.64625	5.78751	5.93404	5.8715	6.56201	5.99449	5.55862	5.63633	6.04335	5.95202	5.96306	5.9564	6.12914	6.27699	6.33368	6.62227	7.06119	6.71956	6.93696	6.8922	6.90856	6.26587	6.06008	6.46064	6.57948	6.77717	7.21278	7.38649	6.97575	7.57267	8.07611	7.1803	7.16567	7.49894	7.15412	7.51146
114	5.42185	5.47365	5.41399	5.37551	5.42365	5.16682	5.18052	5.26035	5.13731	4.80399	4.77254	4.83399	5.10854	5.45168	5.67675	5.92357	5.95679	5.82886	5.65683	5.38075	5.88629	5.70228	5.71208	5.61763	6.00998	6.12914	6.18845	5.98393	6.44349	6.52818	6.28355	6.64077	6.53847	6.28149	5.94445	6.11967	6.4531	6.24865	6.4053	7.21667	7.00357	7.23587	6.95388	6.94832	7.21845	6.95734	6.77617	6.97977	7.56067
115	5.39479	5.50546	5.35357	5.15276	5.19983	5.17993	4.94188	5.00484	4.73675	4.50284	4.72331	4.55304	5.25277	5.50775	5.58165	5.82325	5.54844	5.63766	5.4904	5.62673	5.41857	5.35276	5.43963	5.61322	5.9232	6.12914	5.85293	5.54779	6.15867	5.91186	5.96541	6.0635	5.96095	5.54339	5.56882	5.70346	5.84018	6.48111	6.68619	6.44633	6.43404	6.02408	6.3855	6.70018	6.80829	6.70018	6.35186	7.26817	7.76052
116	5.33017	5.34924	5.19815	5.16197	5.18516	5.17004	5.14413	4.44376	4.50536	4.70534	4.51582	5.12715	5.44234	5.45639	5.23449	5.44514	5.69872	5.63894	5.40748	5.16616	4.99879	4.62679	5.43752	5.69302	5.61834	5.88407	5.36645	5.34702	5.79717	5.45207	5.68768	5.68135	5.71991	5.68095	5.65373	5.27672	6.02524	6.03104	6.05812	6.28259	6.00056	5.68106	5.48178	6.11428	6.4436	6.71676	7.03434	6.85986	7.66447
117	5.08628	5.01767	5.12076	5.09146	5.30956	5.03306	4.98063	4.53601	4.48448	4.7266	5.00401	5.4564	5.31471	5.15729	5.2505	5.48767	5.7026	5.45639	4.87343	4.92726	4.5853	4.85845	5.52194	5.61763	5.49444	5.5129	5.41373	5.27737	5.39613	5.27409	5.67416	5.42462	5.20218	5.5272	5.49777	5.40386	5.39169	5.5308	5.75962	5.72085	5.6179	4.82863	5.36834	5.73702	6.28777	6.96367	6.75924	7.23627	7.69263
118	4.96066	5.01683	4.97774	5.04038	4.94788	4.91665	4.75763	4.42499	4.86563	4.85559	5.44767	5.19591	5.2374	5.12921	5.43891	5.48072	5.49015	4.89246	4.73249	4.73476	4.57355	5.10679	5.61763	5.16422	5.36958	5.20566	5.10808	5.04194	4.95729	5.16795	5.41038	5.51056	5.62412	5.02278	5.16392	5.09373	5.27066	5.19742	5.01143	5.50821	4.92301	4.95896	5.43105	6.0103	6.52739	6.54489	7.1725	7.42797	6.88136
119	4.79265	4.6259	4.88085	4.90328	4.98681	4.95807	4.7129	4.85524	4.92703	5.12947	5.00401	5.13508	5.25218	5.25907	5.85429	5.50094	5.01089	4.70115	4.72156	4.50426	4.81438	5.27159	5.13034	5.18992	5.13109	4.98786	5.07516	5.27354	4.5932	5.45822	5.07981	4.95575	4.97692	4.9049	4.92855	4.65772	5.0671	5.33087	4.13713	4.59464	5.05421	4.54998	4.95624	5.95042	6.14714	6.46634	6.78089	7.18253	6.78074
[truncated: 71 more columns]
