# Supplementary material for: Unexpected long-term variations of Saturn’s ring current revealed by energetic neutral atom imaging
Source: Research Square preprint supplement (doi:10.21203/rs.3.rs-3271171/v1), 2023-09-18
Supplement: Supplementary file 4 [file 2ecfcf45e5e6ed8181a87004.xlsx]

## Sheet: Fig. 1a_2008
	0	1	2	3	4	5	6	7	8	9	10	11	12	13	14	15	16	17	18	19	20	21	22	23	24	25	26	27	28	29	30	31	32	33	34	35	36	37	38	39	40	41	42	43	44	45	46	47	48
0	16.0406	13.8009	16.2156	17.0372	15.9793	16.9715	17.2591	17.494	17.5078	18.0145	18.0383	17.495	17.3294	18.1357	17.9284	18.3258	18.5435	18.5922	18.5516	18.9776	18.7745	17.3426	18.3478	18.4007	18.3338	18.6747	19.1141	17.7815	18.6292	16.2919	14.5622	14.9543	17.8222	17.621	16.082	16.016	17.6097	14.9415	15.7946	16.27	14.1627	14.0385	13.969	14.3392	12.7683	11.8477	11.5654	11.8655	12.0472
1	16.6791	16.6113	16.1659	16.562	17.5108	17.5495	17.5508	17.5357	18.4695	17.9486	18.0396	17.9338	17.9676	17.7726	18.1537	18.3645	19.2797	19.559	19.1096	19.0993	19.4333	18.2826	18.8058	18.7711	19.1809	19.578	19.4608	18.9216	18.9631	19.2788	18.3258	16.2213	16.975	19.1004	18.2896	18.0585	15.1687	16.6641	17.6959	16.522	15.8026	16.5882	16.0362	17.319	16.6613	13.55	12.2164	12.226	12.1391
2	15.9669	17.1827	17.2931	17.3299	17.471	18.2466	17.9426	18.7438	18.6554	18.8306	18.1926	18.3114	18.0576	18.5099	18.4315	18.6155	19.0483	19.3859	19.5874	19.6781	20.181	19.9083	19.0987	19.81	19.5585	19.4033	19.5815	19.3904	19.4961	20.5271	20.0132	18.7086	17.791	19.0225	19.9071	18.4437	15.2687	16.0939	16.8498	18.7568	17.2664	17.5626	16.9274	18.6206	18.7995	16.0719	14.8104	12.9153	12.8852
3	16.519	16.7899	17.6989	17.6408	18.1521	18.1234	18.2794	18.6616	19.0632	19.5306	19.5293	18.5062	18.42	18.9583	19.5242	19.5077	20.2632	20.0457	20.4018	20.4167	20.7635	19.9037	20.9944	20.1085	20.5852	20.2726	20.6541	20.4326	19.9591	21.7031	20.633	20.1404	19.7392	18.9955	19.9547	21.648	18.8311	17.8659	18.0612	18.648	17.5609	18.63	19.1549	18.0196	19.754	19.2006	17.0863	15.0214	14.4587
4	17.4255	16.9437	17.469	18.0724	18.4985	18.4131	18.4303	18.905	19.1556	19.9128	19.8693	19.4894	19.3735	19.1235	19.6662	20.507	20.4361	20.7794	20.9494	20.6955	21.6517	21.3918	21.5134	20.8372	21.0953	21.438	21.1069	20.9123	21.1069	21.7883	22.3409	21.2261	19.6319	20.2056	19.9272	21.6916	21.7635	19.0865	19.9512	19.8754	20.4272	18.7276	20.609	19.0221	20.1258	18.9261	18.3443	18.3374	16.9099
5	17.3954	17.4529	18.4302	18.1252	18.3301	18.6453	18.5471	19.0035	19.105	19.9429	20.7131	20.1846	20.0855	20.3296	19.939	20.6031	21.1065	21.0998	21.341	21.7695	22.3616	22.3089	22.58	21.9654	21.9941	21.0577	21.8892	22.2333	22.516	22.3993	23.2818	22.5867	22.4032	20.7354	21.7109	21.8667	22.9693	21.8609	20.8181	20.9374	21.6446	21.4521	21.4259	21.7063	21.7225	20.3649	19.7562	19.5663	19.3604
6	17.3095	17.4536	18.0326	18.3082	18.521	18.8812	18.664	18.8939	19.3431	19.66	20.6954	20.9237	20.6866	20.825	21.2642	20.6375	21.0979	21.4113	21.8021	21.671	22.7085	22.8892	23.7195	22.9698	22.4847	23.2842	22.4861	23.2424	23.4162	23.2965	23.5023	24.0231	23.128	22.4255	22.4709	23.3983	23.5879	23.8099	22.9957	22.9426	23.5538	21.9661	20.9399	22.1615	22.5332	22.0902	20.6876	21.4031	21.5727
7	17.0427	17.539	17.7622	18.5059	18.7829	19.0131	19.0833	19.4849	19.3798	19.6151	20.2059	20.6831	20.9316	21.1106	21.1283	22.5379	21.3156	21.2981	21.809	23.1878	22.7738	23.6073	23.725	24.3882	23.5816	24.5379	23.7056	23.7182	23.8691	24.4665	24.7389	23.9764	24.8036	23.5921	23.9187	23.8162	24.6864	25.4435	25.0447	24.2061	23.9261	23.9979	22.4433	21.6876	23.5568	24.0341	23.541	22.3589	21.9432
8	17.9271	17.7497	18.1171	18.5648	18.7804	18.9384	19.6144	19.976	19.3557	19.3308	19.9252	20.1765	20.4096	21.1703	21.1053	22.1793	22.2993	22.2746	21.8063	23.0269	23.3017	23.472	25.0744	25.9194	24.8995	25.1356	25.1557	24.4996	24.4937	25.1346	25.4661	25.3966	25.0177	24.9008	25.2466	24.782	24.5572	25.6075	26.2268	25.6425	25.3306	25.4363	24.5874	23.2969	24.0631	23.8826	23.4004	24.0071	22.4155
9	18.8176	18.3035	18.5547	19.0124	19.6222	19.5495	19.6505	20.0842	20.5259	20.1933	20.2801	19.8919	21.1515	21.1571	21.3114	22.2515	22.6607	23.2998	23.0075	23.4861	24.1902	24.3687	24.827	26.055	26.1408	26.9265	26.1554	26.5607	25.8542	26.022	25.6126	26.0837	25.9161	26.1163	25.5833	25.9077	25.5253	26.4507	26.8948	27.1199	27.1324	27.428	25.3984	25.2632	25.4625	25.0166	23.9259	24.4722	23.5372
10	19.2337	19.2007	18.9363	19.5226	19.5651	20.0337	20.0452	20.4843	20.6545	21.0335	21.0137	20.8973	21.0848	21.1732	22.1841	22.2395	23.579	22.8989	24.1967	23.5252	24.7178	25.4763	24.9256	26.1894	26.8514	27.177	27.3939	27.5811	27.8203	26.6628	26.6386	26.8292	26.856	27.2135	27.1231	26.9436	27.4949	27.6822	27.4576	28.2953	28.354	28.4031	26.8739	26.7532	26.7054	26.2204	24.5281	25.3768	24.9701
11	19.2264	19.2794	19.7465	19.6456	20.1486	20.2126	20.5829	21.2451	20.6023	21.2596	22.002	21.4693	21.564	21.4581	22.8699	22.3176	22.6084	23.9394	23.9661	24.0124	23.99	25.5932	26.4385	26.7077	27.3367	27.9245	27.9069	27.9788	29.7488	28.8898	28.5382	27.7568	28.2026	27.8218	27.8566	27.9453	27.8999	27.663	28.5398	28.0992	29.1385	29.2507	28.8315	28.8348	28.2125	26.9466	27.0504	25.4835	25.893
12	19.9817	20.1314	19.8575	19.8873	19.9956	20.3674	21.1002	20.7471	22.197	22.2015	22.2897	22.4777	22.4998	22.2411	23.3522	23.5085	23.4229	23.2943	24.003	24.5571	25.429	26.1327	26.7041	27.8896	27.7365	28.077	28.4275	29.3488	29.5349	29.8279	30.3674	29.7034	29.1458	29.0895	28.0521	28.9319	29.6797	29.7342	29.354	29.1032	29.6386	30.0249	29.8643	30.1221	29.5167	28.8469	28.9435	29.2035	27.3704
13	19.7735	20.3874	20.7337	20.4125	20.3651	20.7887	21.345	21.9392	22.567	22.7223	23.3364	23.7408	23.3986	23.1652	23.1501	23.5139	24.2121	24.2669	25.5819	24.7748	25.524	26.3682	26.7472	27.6289	28.6503	29.4252	29.2858	29.5387	29.4435	30.3487	30.2713	30.9478	31.178	31.0657	29.8958	29.658	30.4179	30.3332	30.0869	30.0213	30.0789	30.5971	30.5022	30.7252	31.015	30.9682	30.8043	29.7641	29.7323
14	20.1597	19.9519	20.6568	21.2659	21.2666	21.1927	21.7132	22.8757	22.7862	23.4102	23.6752	23.4062	25.1374	24.6059	23.5746	23.581	24.8795	25.3027	25.5667	25.467	25.8634	26.7677	27.78	28.238	28.9141	29.8386	30.2105	30.0525	30.127	30.6073	30.9651	31.9551	32.3748	32.6183	31.8672	31.1024	30.9831	31.1775	30.3284	31.0173	30.8496	30.9166	30.669	30.8897	31.4903	31.9766	30.8068	32.4022	31.8602
15	20.162	20.3448	20.8005	21.798	22.3668	22.592	22.4574	23.5034	24.4563	24.0062	24.1854	24.1695	24.2954	25.0312	25.9174	25.0925	24.3272	24.787	25.9006	25.5274	26.8006	27.6061	28.1514	29.4947	29.2656	29.6692	30.9791	31.2705	30.9612	32.1616	32.9799	32.7182	32.911	32.8966	32.8964	33.1027	32.0073	31.819	31.6724	31.4777	31.8633	32.3058	31.5951	32.1117	32.4599	31.975	32.6106	32.8818	33.7473
16	19.5947	20.3027	21.3543	21.7105	22.4897	22.5213	22.7415	23.5773	24.6592	24.6234	25.0597	25.3025	25.3409	25.5048	25.8642	26.247	25.6892	24.992	25.5808	26.8813	26.8876	27.7944	28.4418	29.1198	30.2008	30.4262	31.3607	31.6177	31.1248	31.7539	32.5346	32.9325	33.204	34.0474	33.2174	33.9754	34.2508	32.9349	33.5196	32.1925	33.2869	32.7909	33.0762	33.4629	34.3127	33.0191	32.6577	34.1651	35.0776
17	19.7947	19.9792	21.0932	21.9875	22.4425	22.6613	23.5981	24.1159	24.2898	25.4267	25.1036	25.1338	25.9779	25.7874	26.2117	26.1003	26.2176	26.2088	26.1833	26.895	27.0955	28.0106	28.3922	29.13	29.6317	31.1932	32.2559	32.3553	31.3131	32.2799	33.0858	33.6251	33.8823	34.0603	34.8212	34.4782	34.8747	34.4839	35.3503	35.2957	33.8392	34.6958	34.5693	34.6751	34.8539	36.2501	34.2037	35.0446	36.7066
18	20.3078	20.545	21.0624	21.5215	22.2514	22.8885	23.5877	23.8837	24.14	25.0362	25.7412	25.7665	25.217	26.0353	26.6748	27.3011	26.9154	26.2268	27.21	27.2542	27.9854	28.3245	28.3582	29.2494	29.8799	31.0413	32.2644	33.2218	32.2804	32.5561	33.3716	33.6921	34.6229	35.1444	35.0213	35.2924	35.0204	35.2158	36.2602	35.7708	36.3616	35.0306	36.3651	35.6034	37.8582	36.7579	36.5699	35.9914	37.9075
19	20.7968	21.3752	21.0384	21.7633	21.8703	22.6706	24.1602	24.0834	24.2147	24.5019	25.9037	26.8312	26.1364	25.7314	26.5659	27.1547	27.9066	27.8985	27.4415	28.1315	28.4254	29.0885	29.1645	29.7536	30.2841	31.5346	31.1714	32.9071	34.0507	33.4958	33.8564	34.5884	35.8604	36.5126	36.3711	35.8378	36.729	36.5888	37.2351	36.5265	37.2745	36.7093	38.3458	37.6415	38.6848	39.619	37.2042	37.5144	38.7794
20	21.1494	21.7267	21.7422	22.293	22.4368	22.6495	23.046	23.9565	24.8842	25.0313	24.944	26.1913	26.4739	26.2885	26.816	26.7968	27.8433	27.9074	28.547	28.8823	28.9748	28.9757	29.7325	30.5259	30.7102	31.5904	32.579	32.3481	34.0412	33.9748	33.83	35.2565	36.4126	36.7648	37.4789	37.1112	38.0354	38.366	39.1993	38.7381	38.7902	37.1904	38.8317	39.9145	39.9556	40.483	40.457	39.5077	40.5638
21	20.935	21.4957	21.8342	23.0939	23.0809	23.2891	23.7107	24.1354	24.2486	24.9373	25.2274	25.6684	27.0502	26.6843	26.5752	26.9991	27.2627	27.6512	28.6963	29.762	29.8472	29.6654	29.9285	31.3367	31.3111	32.8268	33.0363	34.0136	34.0397	34.7186	34.4011	34.6924	36.7921	37.5031	38.0169	39.8393	39.4311	39.8415	39.8337	39.793	40.3858	39.6314	39.7713	40.9735	41.1189	41.9655	41.4298	41.8845	42.9805
22	21.5383	21.4527	22.1674	22.4661	23.2036	23.735	24.8263	24.6237	25.404	25.6347	25.5106	26.0194	26.3789	27.2069	27.9811	27.9512	26.9423	28.0562	29.1694	29.0761	29.9422	30.8803	30.8452	31.7769	32.7281	32.6618	33.8789	35.3878	35.6021	35.6094	36.0215	35.9629	36.7394	37.6023	38.3156	40.4199	41.3118	40.9163	42.3956	41.6894	42.0089	41.9844	42.707	42.4532	42.5256	42.8733	43.6603	42.9972	44.4674
23	21.3096	21.7675	22.1124	23.1431	23.2799	23.6286	24.3834	25.1264	25.9311	26.2256	26.1682	26.6088	27.2667	27.0623	27.9646	27.752	28.0464	27.9966	29.1763	29.8402	30.7233	30.9883	31.4879	32.4616	34.3543	34.1877	34.8827	35.5973	36.8539	37.1826	36.9082	37.7242	38.6909	39.0527	39.634	39.3187	40.8988	42.2446	43.3335	42.9424	43.8526	43.6977	43.0869	43.9928	44.1435	45.5897	45.2057	44.884	44.8632
24	21.9126	22.1579	22.5708	22.862	23.3079	24.0444	24.8699	24.8649	25.6438	26.266	26.2625	26.9445	27.1557	28.5626	28.2251	28.3937	28.6405	29.1552	29.1859	30.1284	31.2617	32.2283	32.4181	32.7385	33.504	34.5663	35.0445	36.7658	37.0352	37.5846	38.5336	39.2335	39.8961	41.8546	41.2703	41.3234	41.6655	43.9742	44.7058	44.2742	44.8148	45.5146	44.3073	45.3128	45.7989	46.3936	45.9104	46.138	45.7494
25	22.1774	21.852	22.3766	22.5803	23.4529	24.816	24.9126	25.3848	25.7772	26.8179	27.6124	26.548	27.7133	27.7671	28.6445	29.6523	29.3417	29.1802	29.7644	30.7935	31.8679	33.0351	33.9914	33.9137	34.2601	34.7386	35.6418	36.9058	37.0852	37.9092	39.8404	40.4231	42.0767	42.573	42.797	43.4457	43.2923	44.4787	46.0891	45.9867	46.1086	46.1462	46.4983	46.7739	48.2791	49.082	47.8723	47.173	49.026
26	21.3981	21.6553	21.8539	23.0301	23.7432	24.3429	24.7466	25.6744	26.1232	26.341	26.8896	28.3902	28.0031	27.9392	28.781	30.1216	30.0174	30.0277	30.6588	31.1961	32.1098	33.3919	34.3408	34.6272	35.5959	35.4446	35.6761	37.1815	37.0424	37.8171	40.3443	41.6197	42.7866	43.5995	42.6915	44.2824	45.2988	46.4151	46.4594	47.3294	46.504	46.8259	47.9347	49.5805	49.7603	50.9741	49.8941	48.2945	50.8002
27	22.7836	21.9484	22.5504	22.6104	23.764	24.7693	26.0818	24.7585	25.6612	26.4715	28.3326	28.393	29.4143	29.5508	28.8341	29.6683	30.3037	30.488	30.7774	31.2249	32.5483	33.9337	34.2191	35.4037	35.9744	37.1427	36.6251	37.7342	38.3928	39.147	40.5995	41.4911	42.8184	43.5991	45.0746	44.9618	46.1935	48.0271	47.5923	48.6161	48.4804	48.6524	49.0544	50.359	50.8978	52.9266	52.4157	51.0232	52.8955
28	23.7709	23.5855	23.5537	23.9659	24.2996	24.4513	25.586	26.0254	26.2946	26.8848	27.3597	28.1644	29.6997	29.9064	30.297	30.7725	31.0234	30.6424	31.3521	31.8707	33.3378	34.6306	34.9926	35.8677	36.1761	36.8932	38.9803	40.0422	40.4584	40.0233	41.2311	43.3823	43.8346	45.0422	45.5936	46.4069	47.907	49.8756	49.4478	50.0724	50.7868	50.4461	50.7919	51.0711	53.376	53.394	53.5024	53.9495	54.1688
29	24.2656	24.3977	24.4507	24.9278	24.853	24.7315	25.8224	26.0825	26.3861	26.9204	27.5016	28.5351	29.2126	30.5685	30.6596	31.0678	31.1745	31.4099	31.6682	32.3869	33.0212	34.4881	36.1035	36.5293	38.3761	38.42	38.6474	41.2508	43.1111	42.8606	43.2908	44.457	45.2354	46.3093	47.9375	48.6422	48.7439	48.6237	50.4352	50.1454	52.2736	53.2854	53.5258	52.9948	54.0538	55.9148	55.4663	54.522	56.3683
30	25.1626	25.1545	26.202	26.1799	25.2755	25.569	25.5684	26.0146	26.3972	26.8123	27.3732	27.641	28.5005	30.5767	31.4354	31.3757	32.7394	32.64	33.1862	34.0034	33.4339	34.345	36.4828	38.2622	40.4443	40.7272	41.8123	41.6567	44.0302	45.156	46.1823	45.7479	46.7749	47.6538	48.9745	50.1389	49.4729	49.8281	50.9257	51.1969	53.1662	54.5682	56.0239	55.7635	55.9496	56.7699	56.7663	56.1434	56.8762
31	24.965	25.1089	26.3516	26.9714	27.4272	27.4565	27.9787	27.4812	27.4631	27.251	27.5292	29.0356	28.4203	30.2059	31.7429	32.5748	33.2954	33.8564	34.018	35.035	34.7777	35.8956	36.4814	37.9449	40.1302	41.8588	43.4527	44.0424	44.8175	46.7308	47.0847	47.7698	47.6085	48.9665	50.313	50.4082	50.9771	51.2441	52.3894	52.6872	53.7344	55.4772	56.1118	55.8443	55.8493	57.5113	59.0537	58.3154	57.8604
32	24.9049	25.4939	26.2128	27.3093	27.4136	27.7115	28.2041	28.6426	28.7802	29.2304	28.6284	29.096	30.0395	29.5739	30.4387	32.322	33.7076	34.4773	35.2715	36.2767	36.3912	37.1733	38.3765	39.0955	40.6756	41.9003	44.2936	45.1756	45.5991	45.9223	48.6131	48.122	49.3691	49.6331	51.4653	52.0859	52.5698	52.7454	52.976	54.7466	54.847	56.2922	57.8539	58.4557	58.4585	59.2389	61.8052	59.6367	60.6903
33	25.0977	25.4007	25.6696	26.0137	26.5557	27.951	28.587	29.1543	29.9211	30.3462	30.0725	30.1451	30.6063	30.1625	30.496	31.9955	33.9721	35.025	36.1533	37.2739	38.9358	38.7597	39.1426	40.6967	41.3942	43.005	44.3162	45.8947	47.1286	47.7801	48.2944	49.8874	50.3672	50.3015	52.2892	53.2388	54.8966	55.8962	55.0765	55.1798	57.6255	57.2212	58.6034	59.8382	60.7848	60.7944	60.7855	62.9975	64.0353
34	24.1903	25.4751	25.9872	26.2318	26.7275	28.3086	28.8881	29.5251	30.2636	30.2874	31.0257	31.6588	32.3362	32.0182	31.2441	31.9653	33.1618	34.581	36.3162	37.4671	38.0392	39.4627	40.7118	41.0435	42.3847	43.479	45.4126	46.9642	48.4586	50.1699	49.7949	49.8302	50.6493	50.6432	53.0531	55.1544	55.222	57.2808	57.8017	58.1233	58.0761	58.8351	59.1885	61.1394	62.4463	62.3342	64.7822	65.3405	65.3143
35	24.1028	24.2089	25.7974	26.3887	27.39	27.6941	28.7467	29.3287	29.6418	30.7139	31.1581	31.639	32.1444	32.7496	32.9293	33.3655	34.4661	35.6233	36.6106	38.769	39.3219	40.6803	41.2345	42.1649	42.9384	44.1694	46.0388	47.9785	49.437	50.6268	51.1722	50.4305	52.6589	52.6242	53.7941	55.1022	57.8735	57.9163	58.3902	59.1505	60.1799	60.9515	59.9449	62.6092	64.2006	64.2706	65.4392	66.651	67.3642
36	24.4255	24.8357	25.2078	26.1708	26.9085	27.6415	28.6109	29.8102	30.5663	31.373	31.473	32.2009	32.1956	32.7725	33.0825	33.863	35.0407	36.1494	36.9524	37.328	39.0559	41.4671	41.9126	42.152	43.5588	45.5485	45.8577	47.778	48.7949	49.6188	52.3964	53.1421	54.7243	55.0869	54.675	55.2467	58.1704	59.6116	59.9094	61.0621	62.4974	62.1433	62.4638	63.063	64.215	66.1987	67.1409	67.5928	67.7341
37	24.9962	25.7868	25.2352	25.8405	26.8104	27.0308	28.1643	28.9725	29.4385	30.4231	31.3981	32.4902	33.2349	33.08	34.144	34.9194	35.1795	36.4192	37.399	39.2267	39.5787	40.8515	42.217	42.4129	43.865	45.2826	47.3195	48.7876	50.5846	51.9909	53.5632	53.794	54.9799	55.7477	57.2922	58.2842	58.6253	60.5084	61.6217	61.0293	64.4796	65.0786	64.7817	64.4528	66.8303	67.5162	67.5311	68.22	69.3524
38	25.5575	25.8598	26.4358	26.9218	27.5415	27.8673	27.7497	28.6187	29.293	30.633	31.4385	32.3308	32.5776	33.7199	33.8952	36.2502	37.0429	36.2812	37.0591	38.2552	40.9645	42.5045	43.4632	44.6034	44.7302	45.9126	48.5574	49.6195	50.5968	51.8786	54.1972	55.282	56.0026	57.2739	57.9361	59.599	59.6277	61.7401	63.2834	64.0572	64.4876	65.6549	66.0725	66.1402	67.6146	69.6828	70.6936	69.4362	70.4874
39	25.8321	26.3592	26.9858	27.1425	27.4409	27.7357	28.4416	28.8266	29.1727	29.5251	30.6048	31.3251	32.1117	32.5669	33.9033	35.3354	37.3513	38.73	38.8455	39.7662	40.931	41.8912	43.0956	43.96	46.0436	47.8106	49.2562	50.3372	51.8471	53.8212	54.7267	56.2128	57.8338	58.7061	58.9517	59.5699	59.2906	60.8365	62.7255	64.295	64.8196	66.3959	66.6643	67.9917	68.3009	69.9795	71.9387	73.3103	72.4089
40	26.5554	26.6307	27.1274	27.5925	28.4378	28.5558	28.8879	29.469	29.3235	30.1913	30.5386	30.8732	31.4545	32.3245	33.6505	35.4123	37.2834	38.3208	39.2418	41.2169	40.9541	43.5377	44.003	44.513	45.8196	48.2296	49.8547	51.5642	52.7142	53.9462	56.0162	57.2186	57.6646	58.8249	60.4373	60.883	61.3718	62.2731	63.19	62.8397	63.7547	67.8199	68.3672	69.6139	69.4608	71.9454	72.8389	73.4074	73.0885
41	26.3496	26.7533	27.1353	28.2301	28.8775	29.1529	29.6973	30.4948	30.728	30.5603	31.3132	31.539	32.8462	33.1463	34.3484	35.9359	37.0922	38.0247	39.7389	41.5219	43.1694	43.6059	44.9106	44.9954	46.6874	47.8486	49.953	50.7516	53.9209	54.7983	56.0038	57.2436	57.8385	58.3015	60.0926	61.9645	62.1163	62.7496	64.0052	64.058	64.5491	66.1603	69.633	70.1527	72.4042	72.0597	72.5906	74.0637	73.1298
42	26.1052	26.2318	27.3568	27.6545	28.3272	29.2144	29.6197	30.6923	31.2306	31.6368	31.7286	32.492	33.4545	34.4819	35.2601	35.8812	36.9703	38.8649	40.209	42.3596	43.8913	44.5501	44.515	45.0959	47.1662	48.3416	49.7177	51.0181	52.9389	55.7358	56.6533	56.8329	58.9816	59.574	59.7398	61.6856	61.9509	62.9216	64.3227	65.2467	66.1227	68.0499	70.0272	71.1629	70.2682	72.0257	72.1278	71.9038	71.8165
43	25.9652	26.6306	27.1447	28.2502	28.4862	28.49	29.6898	30.8158	31.7909	32.568	32.5643	32.9688	32.7888	34.1538	35.5912	36.2509	37.5715	38.6479	39.8088	41.493	42.7946	45.1919	46.1986	46.0081	46.6556	48.1404	48.9747	51.7614	53.6053	54.7997	56.4884	57.1632	59.3523	60.0244	60.9588	62.4822	62.1306	64.1226	65.1061	65.9706	66.7324	68.3508	68.124	70.1586	71.6358	72.2038	71.747	71.0555	71.5643
44	25.4078	25.9485	26.8229	27.6883	28.974	29.4761	30.0142	30.7066	30.9442	31.5357	32.708	33.1847	34.0574	34.3158	35.0354	36.2939	37.092	38.7905	38.8881	41.2714	42.765	43.2487	46.4027	48.2232	49.8083	48.5345	50.1322	51.8538	53.8416	54.9911	57.2872	58.2317	59.3901	59.179	60.6437	61.599	62.4577	63.7487	64.4579	65.3653	66.9128	68.1883	68.0328	70.8766	71.8688	71.622	72.8245	71.486	70.9933
45	24.2117	25.3744	26.5023	28.0824	28.5979	28.9952	29.8491	30.6136	31.7801	32.0246	32.6163	33.6171	34.4496	34.0659	34.9263	35.2127	37.2175	38.3648	40.228	41.2383	42.7934	43.5218	45.5924	47.3766	48.861	49.7953	50.9625	53.2221	55.3121	56.2942	57.3741	58.3669	60.0103	61.6466	61.3856	61.9755	62.9652	65.1366	65.4253	66.7994	67.6676	68.987	69.4098	69.1914	70.075	71.7563	71.2534	71.7737	71.9415
46	23.9915	24.4949	25.2829	26.7257	28.6239	29.1577	29.776	30.1703	30.6284	32.0695	32.5411	33.4076	34.0926	34.3455	35.3849	36.709	38.0518	39.1518	39.5989	41.0169	43.1523	44.2142	45.2589	47.1198	48.8858	50.9672	51.7325	52.7466	54.5269	55.9747	57.21	57.7308	59.9106	61.5462	62.8893	63.1974	64.1149	64.8383	67.0628	67.6045	68.5112	69.2977	69.622	70.9673	70.6086	70.5297	69.9282	69.1731	69.3511
47	25.7534	26.3215	26.4906	27.0201	27.7274	28.4017	29.24	29.7865	30.5203	30.9427	32.1135	33.3919	33.5357	34.7448	36.3026	37.1212	37.638	39.1282	40.2533	41.7578	43.6235	45.752	46.3613	47.6453	48.7452	51.2605	53.2333	54.6118	55.0988	56.3237	56.6258	58.474	59.9357	60.4796	62.4405	63.4264	63.7707	65.2381	67.1836	68.5261	68.7595	69.4044	69.9601	71.2444	70.4113	71.0001	68.975	69.0995	66.9699
48	26.366	26.0958	26.7712	27.6544	28.7848	29.4008	29.5415	29.7587	30.3096	30.6031	31.5696	32.6545	34.536	35.573	35.8698	37.4756	37.984	39.113	40.3132	41.9427	42.3275	44.615	45.985	46.7815	49.1324	50.3297	53.2497	54.7181	55.2299	56.5772	57.8229	57.8793	59.5225	61.7305	63.6768	64.2857	66.0836	66.3736	67.7333	68.4197	70.3693	70.6008	70.6946	70.5469	70.7723	70.4984	69.9058	68.2577	66.0201
49	25.7364	26.5326	27.7198	28.2717	28.7935	29.4176	29.746	30.9279	31.153	31.0138	31.8648	32.1068	34.1535	35.4798	36.7058	36.8349	37.2116	39.2241	40.2196	41.7808	43.0213	44.5953	45.8112	46.8773	48.2721	50.3201	51.8263	53.9625	55.5958	56.2897	57.3368	59.3014	61.1541	62.5779	63.5266	65.1712	65.4598	66.6254	67.078	68.2142	68.6922	70.3075	70.3304	68.6984	70.129	69.2027	69.2013	68.821	65.656
50	25.5126	26.7394	27.1918	28.2236	28.6136	29.4979	30.0496	30.6127	31.4132	31.8175	32.689	33.4392	34.3762	35.8951	36.2986	36.857	38.2863	38.8509	39.371	41.3728	42.2621	45.4549	46.7175	48.7711	50.1325	52.025	52.2249	53.2459	55.6144	55.7956	58.1557	59.11	59.9938	61.4731	63.2615	64.3286	65.5145	65.9653	66.2636	67.6785	68.3905	68.849	69.7172	67.7646	67.5975	67.0666	67.4045	65.0887	63.5437
51	25.4732	25.4573	26.2663	27.3175	28.244	28.5978	29.9762	30.817	31.5917	31.5909	32.9339	34.1734	34.6202	35.898	36.3295	37.0819	38.0547	39.8829	40.725	42.6867	43.9437	45.4639	47.2859	48.6194	49.7951	51.2785	52.732	53.6304	56.0636	56.8123	58.2356	59.4201	60.5016	61.2706	61.644	63.6067	64.2439	65.7065	66.3465	67.0428	67.2418	67.1882	67.4923	66.4052	65.9892	64.7968	65.3726	62.9453	60.702
52	25.3462	26.1614	26.3028	27.1457	27.7405	28.791	29.5959	30.1302	30.4833	32.0763	32.7318	33.3724	35.185	36.7954	37.0768	37.0241	37.7376	39.9017	42.179	43.5121	45.159	46.7477	46.7353	48.0289	50.5324	51.249	52.4657	52.6983	54.5486	54.992	56.7633	58.459	59.9468	62.0298	63.2545	63.3482	64.6267	66.7806	68.7605	68.4777	66.4105	67.4873	66.7437	65.989	65.3598	63.4673	63.7892	61.8306	59.9899
53	26.2858	26.5899	26.696	27.649	28.1599	28.6938	28.8654	29.5674	30.7346	31.4848	32.8838	34.0408	35.4357	36.3235	37.2762	37.5907	38.7012	40.0242	41.9502	44.2503	44.2151	46.5354	48.0581	49.0668	50.9776	50.5795	52.0505	53.8975	54.5933	55.8212	56.9318	58.5418	59.6753	61.2575	62.4697	63.4917	65.359	67.427	67.973	67.6566	66.8243	66.7285	66.9334	65.2224	65.0744	63.698	62.6504	60.6089	58.0373
54	26.928	26.7884	27.7699	28.109	28.8019	29.5251	30.2137	30.9317	30.8271	31.9979	32.6338	33.5341	34.7343	36.5584	36.0991	37.3729	39.0279	39.8377	41.6993	43.426	43.947	46.1859	47.8465	49.0497	51.1017	52.634	53.322	55.0199	56.1226	57.6915	58.1971	59.0923	60.5775	61.8013	63.4224	63.1176	65.4965	66.6257	67.5095	68.0276	68.3744	67.8792	67.1493	65.2578	65.051	64.2756	61.4893	58.7423	56.7001
55	27.0996	27.8491	28.0397	28.8466	28.7873	29.17	30.1192	30.5527	31.3431	32.3181	32.8986	33.6951	34.4054	35.3579	36.2744	37.3291	38.4437	40.0746	41.7245	42.929	43.4464	44.562	47.2719	49.6568	51.372	53.0674	53.494	55.7703	56.8835	58.1754	58.7614	59.8771	61.2855	62.296	64.0766	64.5209	65.3484	66.0715	66.9205	66.1812	67.6951	67.4473	65.4186	64.5243	64.1699	61.4032	59.9487	56.2112	54.4275
56	26.7465	27.4691	27.7963	28.5679	29.2181	29.7936	30.2933	30.6234	31.2963	31.3983	31.9112	33.4968	34.7054	35.5055	35.9926	36.7262	37.829	39.7118	41.311	42.8841	43.9105	44.4625	46.6076	48.7211	49.4137	51.7374	53.6198	56.068	56.6262	58.3423	59.3473	59.6928	61.3195	62.5443	63.5045	64.0088	65.5171	66.7601	66.2809	65.2316	65.5965	64.8562	64.2933	64.8576	62.9216	60.8045	58.6814	54.9288	53.492
57	26.9207	27.5043	27.5214	28.2193	28.94	29.8822	31.1051	31.145	31.5519	31.9676	32.1718	32.9324	34.1598	35.1843	36.0592	36.0665	37.2059	38.5259	40.2796	42.1184	43.1217	44.4633	45.5706	47.8361	49.2982	50.5706	52.172	54.5684	56.4742	58.8855	59.7734	60.1343	60.6196	62.4559	63.267	64.0059	65.3807	66.8879	66.1156	65.8222	65.6835	64.352	64.0231	63.583	62.5717	59.9234	58.009	54.3152	52.161
58	26.3568	27.651	28.458	28.5478	29.256	30.0689	30.6303	31.408	31.5545	31.9238	32.6338	33.1709	33.6401	34.1737	35.1795	35.741	37.1213	38.8668	39.4805	41.2601	42.831	42.928	45.0003	47.0109	48.6815	48.5229	50.801	52.817	55.3894	56.4952	58.6431	59.9463	60.4227	61.9253	63.4812	64.7522	64.7143	65.9019	65.9254	66.5751	65.1647	64.6023	63.8791	61.9237	60.9547	59.9262	55.7784	52.3272	49.6259
59	26.1514	27.0951	28.3541	29.054	29.4566	30.2199	30.7701	30.9587	31.2354	31.7415	32.5882	33.4362	33.9178	34.1521	34.5123	35.03	36.7823	37.7791	39.3275	40.2426	41.3381	43.3499	45.3225	47.1807	48.0032	49.9982	51.7097	52.624	54.9124	55.7835	57.8136	59.3338	60.0732	60.8848	60.973	61.5264	62.1046	63.1088	64.2452	64.2998	63.0586	63.4523	62.7068	61.6483	59.3106	58.1783	56.5307	52.8475	50.269
60	26.1905	26.8395	27.8749	29.3235	30.0341	30.4121	30.5802	31.2818	31.9033	32.8299	32.7975	33.5411	33.8974	34.4042	34.8076	36.6961	36.8716	37.3072	38.4676	40.4407	42.2156	43.2455	45.2668	46.5065	47.7095	50.1316	52.2587	52.8778	53.7686	56.0867	57.542	60.6927	60.5788	60.8315	61.3311	61.4069	62.7534	62.747	64.0697	65.3606	63.9923	63.907	62.6672	61.5119	60.6223	58.2184	56.6083	52.678	48.5088
61	24.843	26.0593	27.1504	28.2341	29.2296	30.1435	30.4719	30.9408	31.6064	31.819	32.1378	33.0417	34.2963	34.6866	34.8883	36.1729	36.3708	37.7975	38.1906	39.7267	41.5508	44.3915	45.4621	47.266	48.7518	49.9835	51.701	52.1383	53.6794	54.9756	56.0765	57.6895	60.109	59.7985	59.6543	61.3588	61.5805	62.14	63.2896	63.7031	61.8883	62.9313	61.9092	61.2094	60.5545	57.9387	55.896	52.4091	48.9909
62	26.3752	26.7967	26.8518	27.6391	28.3071	28.7208	29.5322	29.888	30.7611	31.0171	31.4063	31.9671	33.3969	34.4558	34.8247	35.7957	36.7773	38.4607	38.4456	39.3861	40.9429	42.3298	43.4661	45.3397	48.378	49.5936	51.2065	52.6795	54.3595	54.4063	55.352	55.973	58.1561	59.2621	59.9295	61.3955	62.3884	62.018	62.7383	63.2119	63.5893	63.2647	62.5596	61.2753	59.8435	58.4758	55.3556	52.9732	49.3468
63	25.3584	25.917	26.8106	27.3796	27.7336	28.4697	29.0158	30.0579	30.5142	30.8389	30.7337	31.0476	33.0855	34.2092	34.7009	36.1657	37.6718	38.9952	39.1427	40.2161	41.7258	43.1962	44.7198	46.0385	47.8239	50.1199	50.998	52.685	53.4027	53.5398	55.02	56.3517	57.3333	57.9617	59.6691	60.376	60.3383	61.9571	61.2816	62.0716	62.93	63.7472	63.2044	62.0966	60.4548	59.2044	56.7516	53.7201	50.6001
64	25.3295	25.798	26.3673	26.2751	27.6354	28.7297	28.8744	28.9098	28.9667	29.7222	30.2891	30.4063	31.7586	33.2754	34.9593	36.6428	37.8838	39.4029	40.0972	39.9152	42.0786	43.0576	44.7642	46.2574	47.6969	49.2241	50.5236	52.1305	51.9501	52.5526	53.936	56.1753	57.9127	58.2366	60.2365	60.7667	61.8918	62.888	64.2008	63.5944	64.512	64.801	65.257	62.9722	61.1047	58.13	56.636	53.9576	51.196
65	25.2197	25.2076	26.1306	26.413	27.1602	27.4408	27.9162	27.6322	28.8367	29.9845	30.2013	30.8838	32.7592	33.8241	35.4991	36.3725	37.677	39.3631	40.4768	42.1973	42.7202	43.3164	45.0287	47.3879	47.9578	48.9186	49.4928	50.5844	51.4133	52.4774	52.6995	55.8559	56.584	57.4456	57.8495	59.3215	59.7559	62.4664	64.5317	63.5735	64.0133	64.0016	63.7942	62.6556	60.3102	58.347	55.4506	54.3539	52.4703
66	24.2683	24.9751	24.9327	25.1846	26.1094	27.3079	27.8656	29.0055	29.9597	30.2846	31.2165	32.1681	33.2329	33.9033	34.5318	35.3641	36.7948	37.768	39.9295	40.9224	42.6361	43.3014	44.7065	45.224	46.1947	47.4501	48.7922	50.3724	52.4419	53.5191	53.2943	54.344	55.3735	56.8936	58.3192	58.8591	60.246	62.4086	63.2797	63.5922	63.2339	62.0734	61.534	61.3712	60.6016	58.2399	56.6624	55.4111	53.13
67	23.2332	24.3791	24.6659	25.3353	26.6059	27.8895	28.499	29.1061	29.7208	30.7058	30.9847	31.8914	32.5366	32.7623	34.2736	35.687	36.9495	38.8109	40.3192	41.4162	42.793	44.7409	44.3666	45.7197	45.8205	46.2351	47.9392	49.0637	50.4349	52.9162	53.4774	55.137	54.8788	54.9464	55.9255	57.4703	58.4302	60.0345	61.0612	61.0861	61.7894	60.8177	59.5742	60.9132	60.4714	59.5748	57.0574	55.4946	53.1891
68	23.3754	24.1537	24.9277	25.4003	26.7003	28.2409	28.4319	29.4961	29.9397	30.2352	31.6209	32.0174	32.3855	33.0482	34.5903	35.8554	37.3745	38.7348	39.2049	41.2493	43.3517	43.3709	44.2348	45.6612	46.5073	46.704	47.9145	49.7446	50.4738	51.5342	52.3466	53.0348	52.7148	54.259	54.7766	56.7797	57.4546	59.1127	60.366	60.101	60.8326	61.3412	60.9407	61.3587	60.8971	60.35	60.3229	57.0359	55.4752
69	23.244	24.1119	25.3811	25.8767	26.9505	27.5761	27.8389	28.8618	29.0204	29.7097	30.8527	31.252	32.0308	33.6969	34.4529	35.6039	36.7823	39.0533	39.9701	41.2445	42.7391	43.0053	43.4063	44.3973	45.4718	46.3315	46.7992	49.3042	50.6142	51.2603	51.1727	51.2692	51.8035	52.5245	54.1842	55.7621	57.2853	58.4916	59.7745	59.9225	61.0852	60.2916	60.8093	60.7536	62.6516	61.9043	60.6746	59.0825	57.8366
70	22.4734	23.1397	24.0587	24.5503	25.5155	26.8215	27.3115	27.9955	28.1547	28.0459	29.1636	30.0519	30.9155	31.7401	32.9845	34.309	35.0541	36.3696	36.8292	38.2088	39.2337	40.4662	42.2978	43.4964	44.1261	45.9851	47.2314	48.7107	49.3086	49.9073	49.8406	50.3988	50.3332	52.0815	53.1116	54.9262	55.641	56.432	58.6395	59.2936	59.6701	60.162	60.6102	61.1274	61.118	60.1008	59.6498	59.3127	56.5004
71	22.2224	23.2247	24.2184	24.1681	25.2268	26.4303	27.4739	28.0468	28.4695	29.061	29.5576	29.9226	30.632	31.228	32.3651	33.2337	33.8623	34.4515	35.3201	35.8425	37.2957	38.8389	40.5654	42.6229	43.1017	44.7687	46.2482	46.6288	47.635	48.4792	49.4037	49.4895	50.7156	51.3473	52.4631	54.1054	55.4655	56.299	58.0874	58.9676	58.8489	59.7855	60.4436	59.6126	61.5208	59.5623	58.3053	58.3189	56.2909
72	22.9251	23.1752	23.9691	24.3458	24.67	25.3838	26.5748	26.6076	27.5956	28.4129	28.7754	29.6529	29.9067	30.5465	31.6398	32.9303	32.8866	33.3377	34.192	35.1172	37.1806	38.0801	39.9641	40.2426	42.6587	44.1992	44.1695	45.3488	46.0081	46.0419	47.4476	47.6584	48.949	50.7505	51.9109	53.5545	54.233	56.5339	58.113	58.5727	59.1692	59.1872	60.1321	60.0301	60.2845	58.5294	57.5624	56.386	55.7025
73	22.0232	22.7182	23.0204	22.9693	23.4946	24.6615	25.6758	25.866	26.5413	27.3145	27.7663	29.0105	29.6215	30.2303	30.2082	31.7328	31.9067	32.6957	33.6473	34.5357	35.4158	36.8301	39.5283	39.9575	40.2589	41.7418	42.5193	43.3715	44.0072	46.424	46.2583	47.309	48.0743	48.6269	50.8263	51.9819	52.9268	54.9162	55.9096	58.6697	59.2144	60.0455	60.777	61.0173	61.2659	58.6476	57.1652	56.5332	55.6853
74	20.8601	21.5417	21.7253	22.4215	22.7878	24.0856	25.1231	25.694	25.7378	26.3616	27.1331	27.5261	28.0693	28.9709	30.2035	30.7903	31.4862	32.228	33.6578	34.1035	34.9014	36.8204	37.1199	37.9826	38.9659	39.0357	40.905	41.8352	42.8791	43.1234	44.086	46.0416	46.8273	48.8424	49.3799	50.5961	52.3282	54.3574	56.634	58.6352	58.8936	59.6247	60.5167	59.1408	59.3131	60.9475	59.2707	59.2446	57.924
75	21.1115	21.2626	21.3113	22.0613	22.7364	22.8877	23.5526	25.1906	25.7425	25.735	26.1502	26.697	26.7917	27.6371	28.6406	29.7055	31.4913	32.169	32.463	33.3611	34.5034	34.9926	35.5083	35.6569	36.5402	37.9789	39.1142	40.5479	40.9796	41.9736	43.0916	45.5072	46.5314	48.0009	48.9614	49.7505	51.5936	52.8355	54.2015	54.7653	56.0358	56.657	56.8415	58.853	58.2835	60.0417	59.1603	58.8054	57.1258
76	21.2297	20.8938	21.4023	21.9991	22.0672	22.4234	23.4315	23.7078	24.5136	25.142	25.3783	26.0221	25.9906	27.1472	28.8409	29.7033	30.3268	30.9562	31.3877	32.2157	33.0037	33.5454	34.3733	34.7138	35.4457	36.944	37.7775	39.1299	40.0029	41.8087	42.5155	44.7111	46.3961	47.4067	48.3252	48.937	50.0803	51.8339	51.4402	52.9538	55.0319	56.6307	56.3638	56.9295	58.0936	57.8143	58.8358	59.2677	56.9284
77	19.7297	19.9759	20.7343	21.2165	21.9973	22.072	22.3767	23.2128	23.6129	24.2467	24.8425	25.0724	26.0553	27.0883	28.5488	28.5386	28.9816	29.2129	29.7438	30.3894	30.7271	31.9857	31.9339	33.3328	34.5848	35.4433	35.9358	37.4056	39.905	41.0899	42.3893	43.7176	43.8696	44.3093	45.6372	47.3521	49.7871	50.9827	51.0533	52.1441	54.0398	55.0335	55.9286	56.9866	56.8627	56.7599	57.2319	56.4357	55.1335
78	19.4336	19.6686	20.0474	19.9935	20.3409	21.2402	22.3575	23.0827	23.1628	23.9885	24.0245	24.3771	25.2094	25.9444	26.2181	26.3667	27.5292	27.9058	28.5101	28.9283	29.4054	30.3504	32.0571	33.6375	33.9603	34.6386	35.1807	35.7169	37.4476	38.6166	40.4646	41.4024	42.2395	42.1888	43.3256	45.5163	47.5883	49.205	50.4733	51.471	52.904	53.1873	54.0597	54.154	54.2265	54.7635	55.921	56.7265	54.8906
79	18.4159	19.181	20.0302	20.5564	20.7285	21.791	22.045	22.6169	23.3009	23.4731	23.7355	24.5297	25.1736	25.7313	26.0992	26.5126	27.0665	27.5373	27.9554	28.5842	29.1199	29.8823	30.469	31.6312	31.8418	32.3243	33.8252	34.2635	35.8736	37.3084	39.3764	39.9628	40.7286	42.2029	42.6114	44.1436	45.3785	46.7525	47.5169	48.4274	49.2556	49.4589	51.2206	52.5524	53.5929	53.9322	54.1895	53.8391	53.8974
80	19.0521	19.5671	19.8836	20.2305	20.6785	21.7808	21.6788	22.0575	22.2726	22.8049	23.2082	23.7617	24.5183	25.6658	25.9018	26.6101	26.5334	27.8084	28.3624	28.428	29.0578	29.4613	29.6574	30.1889	31.603	31.0698	32.095	33.3955	34.1796	36.4112	37.724	38.5859	38.6083	39.0597	40.4596	41.982	42.4424	43.8321	45.2427	46.1164	47.1387	48.5067	49.2571	51.1244	51.1333	51.2087	51.1998	52.226	52.3565
81	19.396	19.7437	19.9557	20.12	20.5538	20.9244	21.2421	22.5727	22.9723	22.8508	23.0348	23.5292	24.5343	24.8456	25.1242	25.7817	26.2489	27.564	27.3585	28.0608	27.6441	28.6311	30.0177	29.4658	29.8667	30.1237	31.4806	32.832	34.2951	35.6742	35.9855	36.6377	36.9529	37.5933	39.0202	40.096	39.983	41.1582	42.3956	43.5336	44.8268	45.921	48.1437	48.7628	49.6064	48.8245	49.5858	50.2833	51.5825
82	18.564	18.9994	19.5563	20.0208	20.0786	20.8359	21.6082	22.1844	21.9744	22.2884	23.2544	23.8059	24.0253	23.8154	24.7047	25.3628	25.8338	25.7909	26.532	27.173	27.5815	29.0368	29.8588	29.5337	30.3166	31.1088	30.9248	31.4446	32.4562	33.6597	34.6486	35.4191	36.3826	37.4206	37.3819	36.6331	37.5313	39.0592	40.3504	41.6172	42.3695	44.3034	46.9763	46.5225	45.6031	46.3405	47.137	48.7146	48.1263
83	18.0285	18.4458	18.8887	19.7411	20.6558	20.5898	20.6343	20.6575	20.5951	21.9443	22.9872	24.1795	23.9087	24.1255	23.8609	25.161	25.7595	25.659	26.3416	26.4411	27.1453	28.654	27.8509	28.8651	29.4549	30.2397	29.6793	31.3254	31.6569	32.5348	33.2021	34.6702	34.5009	35.4002	35.9253	35.8499	36.2734	37.1204	39.5331	40.2731	40.655	41.9068	43.7576	42.7562	43.7612	44.1715	45.2399	45.0581	44.8356
84	18.0224	18.5489	18.8385	19.2454	19.7307	19.8136	20.7167	20.9957	21.6471	22.0954	22.4158	22.0456	22.6067	22.9281	23.2546	23.6239	24.3336	25.2471	25.777	26.7271	27.0588	27.3464	27.4181	27.9108	28.3657	29.42	30.0507	30.6285	31.8662	33.31	33.0381	33.3561	34.548	33.9711	34.8399	34.8216	35.4516	36.7738	38.0483	37.8401	37.9671	38.9119	40.7866	41.7899	41.8772	43.2593	43.1471	42.7972	42.781
85	18.7331	19.1061	19.5132	19.893	20.2242	20.3204	20.7253	20.3413	20.6146	20.9894	21.2715	21.0985	21.1006	22.2377	22.5495	22.9285	24.2656	24.5182	25.2414	25.9081	26.0396	26.2223	26.3688	27.0125	27.5924	28.0041	29.2807	29.7542	30.653	31.9239	32.3299	32.6616	33.6051	33.3674	33.966	33.7267	34.3483	36.147	36.7423	36.8184	36.7534	37.111	38.4841	39.478	40.2503	41.0113	40.9347	40.3017	39.4512
86	18.8203	19.2266	19.5662	20.0704	20.0249	19.7245	19.8535	20.185	20.3744	20.4914	20.7692	20.5347	20.9266	21.45	21.9271	22.8291	24.5353	24.4439	23.8606	24.1401	24.0751	24.532	25.107	25.5742	27.0901	27.3612	27.3394	28.6242	28.8657	30.2033	30.502	31.1526	30.4824	31.4766	31.4278	32.161	33.3595	34.2596	34.8687	34.683	35.1883	35.3992	36.0855	36.8573	36.9501	38.1492	38.5816	38.0306	37.2124
87	18.3758	18.8883	19.3535	18.966	19.3843	18.9157	19.4	19.6298	20.0499	20.2638	20.4832	20.6287	20.4904	20.9046	21.3177	22.6967	22.8582	23.025	22.9466	23.2128	22.764	23.5374	24.3394	24.3709	25.0436	25.5886	26.459	27.7772	28.7629	29.3895	29.3965	29.9007	30.0293	30.4788	30.4554	30.012	31.3698	31.7238	33.3446	33.3254	33.7312	35.1207	34.9364	34.8608	34.8933	34.9849	35.4716	34.4065	35.0634
88	17.8273	18.4115	18.5288	18.1131	18.2928	18.2663	18.5839	19.3635	20.0249	20.0065	20.0589	19.843	20.1674	20.3822	21.2865	22.0749	21.9177	22.5912	22.3238	22.392	22.6446	22.9664	23.2638	23.9156	24.7315	25.8961	26.6793	27.0202	27.8565	28.6235	28.6165	29.0428	29.6094	29.4541	29.1919	29.4768	29.5541	29.7117	31.1585	31.2438	31.9097	31.1578	31.3718	32.3974	33.2386	32.4642	32.1466	32.4883	30.8349
89	17.7887	17.6019	17.4247	17.6188	17.6958	17.9576	18.3038	18.9393	19.3003	19.482	19.049	19.2984	19.9807	20.6091	21.2606	21.337	21.6184	21.9212	21.8591	22.0636	22.9545	23.4394	23.516	23.8335	25.1395	25.8965	26.9461	27.179	27.2225	27.6892	28.0437	28.8631	28.3043	27.6195	26.9973	27.1006	28.111	27.2989	28.2383	28.4777	28.4459	29.1608	28.8817	30.4579	31.1985	30.5213	29.723	29.6331	28.1962
90	17.0116	17.0384	17.0688	17.1537	17.3813	17.6413	17.8405	17.9832	18.4427	18.3257	18.6381	18.8103	19.3302	19.9356	20.0282	20.6017	20.562	21.0464	22.1655	22.2788	22.8701	23.6173	23.7723	24.472	24.806	25.218	25.6531	26.3635	26.7773	27.8036	26.9789	26.7113	26.2447	25.6337	25.3838	25.6972	26.3901	26.7861	26.4459	26.2162	26.5707	27.6613	27.3176	28.3316	28.626	27.4376	27.8142	27.4161	26.7225
91	16.6752	16.7717	16.8792	16.9598	16.9891	16.723	17.3165	17.5262	17.5942	17.7694	18.4623	18.663	19.0172	18.8698	19.1518	19.649	20.1696	20.6786	21.4071	21.6373	22.4659	22.6389	23.4421	23.9258	24.1012	24.8175	24.9713	25.5061	25.6367	25.7627	25.7044	25.6795	26.1442	24.5182	25.4465	25.241	25.7474	26.1127	27.0021	25.9024	26.0219	25.1915	25.095	26.3375	25.2794	24.6625	25.2912	25.3517	25.5567
92	16.5216	16.1634	15.5512	16.2718	16.0433	16.7389	16.418	17.0161	16.4757	17.4593	17.9436	18.1144	17.8533	18.1981	18.268	18.7902	19.5476	19.7673	20.655	21.3015	21.1789	20.8359	21.7931	23.1993	23.6669	23.3474	24.0395	23.5714	24.2074	23.7792	24.9807	24.9528	24.9682	24.2896	23.961	23.6556	23.9999	23.8312	25.4133	24.6457	23.6488	24.2933	23.3914	23.375	23.4578	23.831	23.8442	24.4005	24.2395
93	14.8764	14.1867	14.5193	15.8513	15.7279	16.281	16.2208	16.0228	16.3409	16.2659	15.8004	16.1992	16.3116	17.7234	18.0329	18.0907	18.7874	19.7113	20.2667	20.3543	20.1677	20.2661	21.3013	22.1481	22.0801	22.1	22.4547	22.735	24.194	24.2934	23.969	23.0227	23.4215	23.0869	22.4129	21.9699	22.5928	23.5612	22.5131	23.0483	22.5749	21.9159	22.3071	22.812	23.1889	22.8423	22.9634	23.5092	23.9287
94	12.256	12.5404	12.8563	12.6874	13.2827	14.3166	14.3273	15.2393	15.9331	13.7172	16.1617	15.4524	15.3776	17.2668	17.0234	17.9558	18.4399	18.998	19.3975	19.2028	19.3242	19.5122	19.8357	19.8149	19.4388	20.7015	20.9526	22.3376	23.0081	22.4528	22.7199	22.1361	21.8468	21.6701	21.5066	21.7411	21.5428	21.3764	20.8053	21.5289	21.5266	22.2957	21.9206	22.2422	21.518	21.4699	22.6582	22.5399	22.1871
95	10.6674	10.588	11.113	11.8593	12.5501	14.0477	14.4834	13.9526	13.5339	13.0722	14.6612	15.2966	14.8009	16.6559	16.8135	16.7976	17.769	17.8055	17.9111	18.3574	16.6553	15.6796	16.5973	16.6219	18.6464	20.0624	20.2834	20.9155	20.6478	20.7235	20.8034	20.4348	20.094	20.3739	20.7971	21.0252	21.1459	20.5854	20.3321	20.0155	20.6383	20.6406	20.9652	20.3601	19.7239	19.2237	20.4195	19.657	18.3811
96	8.60554	8.7822	9.80781	10.2709	10.5143	12.1331	12.3746	11.923	11.9149	12.5291	12.4251	12.3489	13.0817	13.172	14.2733	14.6132	14.7672	14.552	14.2365	13.6352	12.9448	13.7986	14.969	15.6748	17.0293	16.9493	19.3372	19.8765	20.2655	20.0185	20.0243	19.9894	19.2213	19.1145	18.1028	19.2707	18.266	19.5621	19.1641	19.0709	18.0992	17.6856	18.9919	17.9966	16.2618	16.8183	16.4422	17.7449	15.5736
97	7.73026	8.11372	9.30479	10.3786	10.4863	11.5974	11.6967	10.2509	10.404	9.74347	10.4327	11.1696	10.8966	11.3738	11.3025	11.3355	10.7309	11.4481	11.4913	11.6759	11.7655	12.6025	13.0113	14.4168	13.7367	15.8661	17.1252	16.841	17.3398	17.8581	17.6867	16.8653	17.3154	18.9488	17.2497	15.9128	15.7305	15.9502	16.1829	16.1326	14.8966	15.7147	15.0837	15.2661	14.5563	14.1931	14.7683	14.4319	14.6842
98	7.51888	7.76852	8.90883	9.77668	10.1066	9.73641	9.10278	9.04549	8.59757	8.77537	9.22393	10.7125	10.4754	9.64613	9.43125	9.26686	9.45955	10.2934	10.322	10.8604	11.2226	12.2538	12.4587	13.464	12.9465	14.5239	14.7797	15.0132	15.8333	14.5827	15.5435	16.7946	17.0526	17.4178	16.4103	13.9266	13.1371	13.7541	14.107	13.4853	13.299	13.337	14.0396	14.0067	13.4244	13.0327	12.9563	13.4114	12.9436
99	7.15437	8.0003	8.23631	8.13347	8.42835	8.27736	8.34643	8.26408	8.23007	8.39277	8.63377	8.70867	8.63387	8.9704	8.98756	9.11062	9.38421	9.80819	9.64136	10.4867	10.7799	10.8036	10.9138	11.4292	12.1082	12.1281	14.0435	13.3277	13.2102	12.8087	14.0653	14.6041	16.0469	14.7215	13.022	11.838	12.0911	12.5264	13.0045	12.8062	12.8339	12.806	12.8408	12.8602	12.0324	12.0506	12.4073	12.8195	12.6408
100	7.23987	7.56969	7.66285	7.72324	7.57198	7.74095	7.66917	7.66955	7.73256	7.97249	7.97925	8.42061	8.71917	8.99105	9.07149	9.12075	8.99947	9.53776	9.50078	9.57841	9.98844	10.125	10.5278	11.4138	11.3738	10.3075	10.8928	12.0837	11.8233	12.3356	12.8223	13.8295	12.9384	11.7331	12.4233	11.3683	11.59	12.4222	12.0404	11.9673	11.5705	11.9586	12.2431	12.5601	12.1256	12.1133	11.4949	11.9726	11.7645
101	7.10087	7.27085	7.2847	7.28462	7.2952	7.30323	7.42275	7.60868	7.60073	7.59752	7.96085	8.2071	8.85431	8.92056	8.68857	8.65156	8.82631	9.11865	9.25257	9.63527	9.89609	10.1317	10.6508	11.569	10.2399	10.5908	10.7686	11.321	11.1978	11.1841	10.4061	10.6825	10.5907	11.4709	10.8065	11.4073	11.5255	11.531	10.5513	11.0572	11.0644	11.2102	11.1409	10.9984	11.4784	11.247	11.4412	11.4557	11.6685
102	7.00431	6.99686	6.8754	7.27122	7.3674	7.42272	7.44638	7.66292	7.62853	7.87903	8.13018	8.22599	8.11594	8.11816	8.39761	8.64428	8.98177	8.98177	9.13964	9.7072	10.1627	10.3757	10.2859	9.97927	10.0666	10.1156	10.0561	10.1649	10.1642	10.0389	10.0692	9.66488	10.0737	10.0591	10.3984	11.0091	10.7701	10.9448	10.5832	10.7469	10.5773	10.2638	10.2358	10.4667	10.5462	10.6209	11.1013	11.492	11.0079
103	6.58118	6.79611	7.04937	7.11805	7.33531	7.42464	7.41493	7.67125	7.85671	7.97261	8.08726	8.05559	7.91639	8.17091	8.42124	8.61816	8.867	8.94343	9.29696	9.46266	9.6973	9.85466	9.95934	9.5775	9.34763	9.7712	9.72154	9.43279	9.44657	9.41646	9.53775	9.51371	9.60602	10.007	10.0473	10.1062	10.4169	10.0387	10.2058	9.88428	9.78395	9.83565	10.0953	10.0886	9.79189	10.4198	10.612	10.99	10.7295
104	6.71694	6.81875	7.11253	7.14658	7.28462	7.33024	7.29342	7.47837	7.46745	7.83631	8.10074	7.79964	8.0338	8.00903	8.31972	8.51249	8.74844	8.69363	9.0033	9.4348	9.31675	9.2315	9.31675	9.09941	9.24423	9.2584	9.31675	9.22466	9.37886	9.46435	9.31675	9.22185	9.32085	9.6952	9.68677	9.70636	9.87046	9.76169	9.29133	9.18686	9.38228	9.67594	10.2246	9.77567	9.85997	10.0114	10.3827	10.2764	10.0474
105	6.77728	7.02449	6.93915	7.10576	7.26726	7.31538	7.41212	7.58694	7.61894	7.96385	7.87174	8.00903	8.01603	8.02142	8.26204	8.29474	8.52383	8.72842	8.86008	8.91011	8.77756	8.9718	8.83782	9.11142	9.07609	8.93314	9.26693	9.31675	9.28954	9.28984	8.7847	8.92329	9.24709	9.36272	9.10618	9.29915	9.05772	9.0883	8.87743	9.08364	9.85873	9.6368	9.60779	9.34428	9.36955	9.58435	9.86828	9.84462	10.0546
106	6.69139	6.80759	7.04631	7.24329	7.27975	7.08691	7.46883	7.41291	7.71263	7.84234	7.8036	7.63734	7.61264	7.83023	8.16719	8.03582	8.1431	8.40251	8.45805	8.71697	8.52368	8.48016	8.6069	8.76994	8.66934	8.74415	8.63604	8.85254	9.06838	8.63963	8.7695	8.68189	8.34922	8.82759	8.8975	8.80853	9.01793	8.828	9.04839	9.1974	9.55495	9.188	8.96325	8.99735	9.19842	9.14714	9.29889	9.2775	9.30062
107	6.90665	7.19698	6.95724	6.87333	7.0963	7.18323	7.1563	7.34292	7.48928	7.545	7.40949	7.17828	7.47216	7.72428	7.75936	7.7029	7.81049	8.38913	8.6018	8.31431	7.74534	8.03032	8.63273	8.07177	8.48009	8.44361	8.54289	8.44122	8.6399	8.36668	8.48518	8.69888	8.46239	8.7555	8.7191	8.58147	9.12543	9.08045	8.86781	8.80375	9.33335	9.27723	8.703	8.90117	8.53409	8.19637	8.50177	8.23905	8.59159
108	6.64713	6.54006	6.53222	6.82073	7.12832	6.90449	6.82464	7.18982	7.15535	6.98521	6.6871	6.92149	7.44221	7.78037	7.74586	7.54204	7.7728	8.27665	7.926	7.77508	7.6587	7.86392	7.67045	7.81565	8.20544	8.49505	8.34299	8.11882	7.92804	7.93861	8.42802	7.72064	8.07846	8.23271	8.59633	8.94716	8.80876	8.80709	8.44323	8.7432	8.25477	8.12901	8.14202	8.51145	8.32041	8.52817	8.02179	8.19554	7.57042
109	6.23562	6.42641	6.45251	6.44523	6.42396	6.4568	6.74431	6.79166	6.77405	6.83392	6.9279	7.07992	7.32167	7.49841	7.45555	7.6266	7.7728	7.6997	7.35594	7.30489	7.48952	7.29832	7.62538	7.8923	8.05509	7.89615	7.64146	7.60735	7.45681	7.42701	7.35212	7.616	7.6358	8.03469	8.42905	8.49678	8.03641	7.79966	7.62898	8.24492	7.71312	7.52353	8.08834	7.88906	8.01127	7.91116	7.73438	7.86194	7.30685
110	6.22913	6.29376	6.12497	6.32086	6.23862	6.42641	6.48778	6.62565	6.91029	7.031	6.9706	6.86626	7.16435	7.05313	7.11042	7.30255	7.33832	6.80631	7.28462	7.16774	7.28911	7.61782	7.61284	7.61691	7.43436	7.25351	6.73898	7.0985	6.85338	7.07611	7.44502	7.58308	8.02433	8.12809	7.90619	7.83383	7.42859	7.22415	6.98317	7.07028	7.2498	7.28058	7.57401	7.62289	7.48418	6.93369	7.65163	7.14155	6.98935
111	5.95434	6.12983	6.24321	6.06049	6.56662	6.48226	6.44446	6.8321	6.57725	6.38942	6.50705	6.55371	6.81983	6.85236	6.86928	7.16122	6.81455	6.82149	7.01161	7.23443	6.79792	7.15414	6.84671	7.24276	7.33916	6.70368	7.03145	6.52963	6.89841	6.9806	7.02008	7.34456	7.87206	7.48986	7.31998	7.15146	6.85613	6.61258	6.4951	6.60467	7.18573	7.4867	7.07486	7.18534	6.50634	6.24703	6.64536	6.79262	6.39655
112	6.02081	6.31658	6.30074	6.02376	6.36089	6.22742	6.53998	6.31214	6.14049	5.85084	6.2342	6.22485	6.57964	6.66937	6.54852	6.31644	6.45829	6.65238	6.92006	6.75561	6.51413	6.64563	6.5199	7.03847	6.85986	6.5117	6.39028	6.32763	6.83463	6.99843	7.29107	7.43818	7.55323	7.22161	6.69861	6.65349	6.33923	6.59581	6.22858	6.54341	6.70018	7.65166	6.37681	6.37292	6.32736	6.26706	6.71058	6.77287	6.28154
113	6.15536	6.06361	6.07037	6.06882	6.05743	6.04625	5.89977	6.07037	5.94909	5.95162	6.07037	6.30385	6.23834	6.02938	5.94124	5.96761	6.18925	6.81714	6.49466	6.43475	6.34903	6.14705	6.33373	6.14231	6.19848	6.06063	6.42513	6.33017	6.79735	7.07275	7.12881	7.43041	7.16073	6.90897	6.13526	5.88021	5.91559	5.97374	6.13689	6.23928	6.95747	6.62836	6.06491	6.62297	5.9904	6.10049	6.18395	5.78112	5.87363
114	5.92016	5.88703	5.88703	5.7796	5.8703	5.88703	6.02213	6.02869	5.96694	5.63275	5.60186	5.74344	5.69362	5.79232	5.69238	5.95546	6.38581	6.40898	6.26544	5.86686	5.86686	5.84671	5.85429	5.86272	5.95615	5.71323	6.20424	6.15402	6.85483	6.92027	7.03241	6.72913	6.54834	6.28826	5.72308	5.77437	5.68374	5.61763	5.51152	5.61763	6.30629	6.85996	6.57728	6.16738	5.87909	6.00361	5.10305	5.34564	5.99069
115	5.68658	5.77328	5.77835	5.75308	5.57622	5.57564	5.77238	5.60293	5.46503	5.55745	5.61836	5.39332	5.49321	5.79034	5.9271	6.23786	6.04474	6.20682	5.75291	5.86272	5.78928	5.5576	5.70976	5.68887	5.5314	5.81475	6.06558	5.87314	6.55263	6.24843	6.54182	6.13457	6.15286	5.76661	5.61879	5.41807	5.23048	5.33222	5.33155	5.61763	6.1363	6.15267	6.21417	6.0382	5.7138	5.9837	4.98069	5.70303	5.78658
116	5.46334	5.63174	5.55044	5.5576	5.55745	5.46419	5.46162	5.47151	5.46503	5.46177	5.17493	5.46419	5.79281	5.93636	5.83493	5.69705	5.72203	5.82084	6.04197	5.86504	5.34427	5.50685	5.68628	5.5576	5.54623	5.9232	5.67131	5.77567	5.88566	5.79034	5.97845	6.05346	5.8623	5.48413	5.22906	4.82458	5.33087	5.20902	5.61879	5.83164	6.56488	5.98511	6.24008	6.22631	5.68461	5.848	5.31349	5.01683	5.64239
117	5.38624	5.46255	5.46255	5.46334	5.46162	5.46334	5.46042	5.46419	5.42522	4.85441	5.23785	5.61936	5.73638	5.68486	5.12196	5.28853	5.73316	5.75454	5.14207	5.26268	5.30917	5.64112	5.78928	5.82618	5.84445	5.5292	5.50995	5.29555	5.65868	5.49699	5.94728	5.78398	5.36859	4.92248	4.49685	4.67793	4.79435	4.99636	5.15717	5.88676	6.00229	5.63717	6.22631	5.92669	5.9657	5.39611	4.84123	5.02576	5.71758
118	5.36763	5.31672	5.33219	5.27461	5.22113	5.2973	5.29355	5.02196	4.85442	5.16905	5.51217	5.42402	5.2505	5.24276	5.31013	5.30255	5.57678	5.14036	5.1714	5.02786	5.45639	5.66357	5.70747	5.48759	5.49781	5.26402	5.41529	5.2253	5.38737	5.65667	5.65304	5.55496	4.77305	4.19564	4.03301	4.54497	4.38687	4.30204	4.38198	5.33311	5.46408	6.02514	5.68263	5.57155	5.29713	4.57137	4.16098	4.90804	5.40234
119	5.21835	4.94853	5.00068	5.26909	5.04272	5.02052	4.93024	4.76663	4.97698	5.46334	5.2501	4.98696	5.20423	5.14133	5.5576	5.17965	4.84219	4.88156	4.96111	5.15647	5.34123	5.44181	5.41823	5.45639	5.43506	5.18439	5.40195	5.3178	5.28432	5.51312	5.27918	4.73409	3.91558	4.03301	4.31619	4.14913	4.30051	4.37291	4.05435	5.35254	5.37085	5.48772	5.13339	5.28032	5.12567	3.91543	4.26042	4.83929	5.40486
[truncated: 71 more columns]
