# Supplementary material for: Unexpected long-term variations of Saturn’s ring current revealed by energetic neutral atom imaging
Source: Research Square preprint supplement (doi:10.21203/rs.3.rs-3271171/v1), 2023-09-18
Supplement: Supplementary file 5 [file 2f8672af5a0b43475bef101f.xlsx]

## Sheet: Sheet1
Fig. 2b
Year		2006	2007.17	2008.38	2009	2009.33	2011.5	2013.25	2013.75	2016.75
Local Time		22.8405	0.746402	3.47801	1.81853	1.75219	1.17853	22.5828	21.9383	23.0078
Year		2004	2005	2006	2007	2008	2009	2010	2011	2012	2013	2014	2015	2016	2017
Sunspot Number		65	46	25	13	4	5	25	81	85	94	113	70	40	22
Parameters for Sine Fitting			f(x)=a+b*sin(π*(x+c)/d)
	a		b		c		d
	-0.005884		2.27957		40.8853		5.71787
