# Supplementary material for: Unexpected long-term variations of Saturn’s ring current revealed by energetic neutral atom imaging
Source: Research Square preprint supplement (doi:10.21203/rs.3.rs-3271171/v1), 2023-09-18
Supplement: Supplementary file 6 [file 371474315d8dcce6dbb384a1.xlsx]

## Sheet: fi1
	0	1	2	3	4	5	6	7	8	9	10	11	12	13	14	15
0	0.0517616	0.0857093	0.125396	0.164244	0.19504	0.212534	0.214981	0.20408	0.183718	0.158393	0.132006	0.107283	0.0857262	0.0678679	0.053613	0.0425382
1	0.0503686	0.0836089	0.121824	0.15802	0.184951	0.197874	0.195919	0.181654	0.159504	0.134057	0.108937	0.0864102	0.067507	0.0523801	0.0406828	0.0318586
2	0.0489846	0.0816565	0.118599	0.152379	0.175729	0.184461	0.178611	0.161583	0.138244	0.113154	0.0895818	0.0693086	0.0529174	0.0402363	0.030729	0.023759
3	0.0477419	0.0800498	0.115996	0.14767	0.167786	0.172745	0.163503	0.14425	0.120195	0.095779	0.0738596	0.0557387	0.0415998	0.0310098	0.0233014	0.0178016
4	0.046766	0.0789793	0.114275	0.144209	0.161468	0.16306	0.150866	0.129809	0.105359	0.081761	0.0614442	0.0452589	0.033047	0.0241749	0.017893	0.0135227
5	0.0461739	0.0786283	0.113683	0.142289	0.157066	0.155648	0.140839	0.118258	0.0935677	0.0707804	0.0518971	0.0373606	0.0267282	0.0192177	0.0140328	0.0105071
6	0.0460763	0.0791778	0.114469	0.14219	0.154844	0.150696	0.133486	0.109507	0.0845791	0.0624668	0.0447658	0.0315576	0.022165	0.0156961	0.0113299	0.00842018
7	0.0465821	0.0808156	0.116893	0.144205	0.155064	0.148375	0.128843	0.10344	0.078141	0.0564682	0.039645	0.0274352	0.0189663	0.0132612	0.00948484	0.00701112
8	0.0478059	0.0837476	0.121244	0.14866	0.158019	0.14888	0.126966	0.0999701	0.0740425	0.0524935	0.036209	0.0246706	0.0168364	0.0116565	0.00828259	0.00610337
9	0.0498759	0.0882106	0.127862	0.155941	0.164066	0.152467	0.127972	0.0990725	0.0721481	0.0503377	0.0342253	0.0230355	0.0155699	0.0107071	0.00757964	0.0055812
10	0.0529411	0.094484	0.13715	0.166518	0.173652	0.159484	0.132072	0.100819	0.0724199	0.0498952	0.0335584	0.0223923	0.0150426	0.0103086	0.00729146	0.00537783
11	0.0571788	0.102899	0.14959	0.18096	0.187337	0.170402	0.139596	0.1054	0.0749355	0.0511683	0.0341712	0.0226896	0.0152036	0.0104173	0.0073836	0.00546749
12	0.0627975	0.113845	0.165748	0.199945	0.205813	0.18583	0.151021	0.113148	0.0799026	0.0542766	0.0361281	0.0239614	0.0160725	0.0110468	0.00786788	0.00586212
13	0.0700362	0.127758	0.186266	0.224254	0.229898	0.206526	0.166979	0.124547	0.0876733	0.0594671	0.0396019	0.0263315	0.0177414	0.0122693	0.00880399	0.00661321
14	0.0791543	0.145107	0.211826	0.254736	0.260513	0.233384	0.18826	0.140248	0.0987551	0.0671259	0.0448843	0.0300224	0.0203837	0.0142238	0.0103066	0.00781842
15	0.0904107	0.166344	0.243091	0.292235	0.298617	0.267385	0.215782	0.161051	0.113812	0.0777863	0.0523975	0.0353683	0.024267	0.0171281	0.0125572	0.00963297
16	0.104025	0.191833	0.280595	0.337466	0.345087	0.309502	0.250528	0.187871	0.133648	0.0921257	0.0627002	0.0428262	0.0297661	0.0212939	0.0158194	0.0122842
17	0.12012	0.221745	0.324591	0.390838	0.400536	0.360539	0.293418	0.221651	0.159151	0.110937	0.0764762	0.0529763	0.0373715	0.0271378	0.0204518	0.0160853
18	0.138646	0.255919	0.374854	0.452211	0.465067	0.420905	0.345117	0.26321	0.191187	0.135058	0.0944917	0.066498	0.0476779	0.0351796	0.0269108	0.0214408
19	0.159297	0.293717	0.430473	0.520642	0.537985	0.490319	0.405773	0.313025	0.23043	0.16524	0.1175	0.0841039	0.0613385	0.0460102	0.0357289	0.0288305
20	0.181427	0.3339	0.489671	0.594143	0.617509	0.567507	0.474709	0.370943	0.277109	0.201948	0.146082	0.106413	0.0789654	0.060212	0.0474491	0.0387535
21	0.204014	0.374564	0.549721	0.669561	0.70059	0.64995	0.550133	0.435891	0.330731	0.2451	0.18042	0.133757	0.100965	0.0782181	0.0625017	0.0516194
22	0.225674	0.413209	0.607039	0.742638	0.782907	0.733792	0.628965	0.50563	0.389811	0.293802	0.22004	0.165944	0.127322	0.100115	0.0810251	0.0675829
23	0.244781	0.446958	0.657488	0.808355	0.859145	0.814013	0.706876	0.576693	0.451723	0.346147	0.263594	0.202032	0.157375	0.125429	0.102662	0.0863544
24	0.259665	0.472919	0.696899	0.861521	0.923581	0.884908	0.778635	0.644584	0.512781	0.399197	0.308774	0.240206	0.189674	0.152971	0.126407	0.10705
25	0.268879	0.488648	0.721717	0.897549	0.970896	0.940857	0.838757	0.704283	0.568597	0.44923	0.352461	0.277853	0.222011	0.18084	0.15059	0.128176
26	0.271464	0.492589	0.729621	0.913241	0.997049	0.977217	0.882354	0.750995	0.614714	0.492247	0.391138	0.311898	0.251686	0.206649	0.173074	0.147802
27	0.267143	0.484373	0.719964	0.907364	1	0.991141	0.905979	0.780982	0.647377	0.524666	0.421498	0.339338	0.275991	0.227953	0.191649	0.163932
28	0.256374	0.46489	0.69388	0.880863	0.980058	0.982068	0.908242	0.792234	0.664225	0.544003	0.441088	0.357846	0.292766	0.242774	0.204522	0.174958
29	0.240258	0.436109	0.654056	0.836649	0.939772	0.951772	0.890007	0.784804	0.664708	0.549333	0.448793	0.366245	0.300857	0.250033	0.21072	0.18003
30	0.220325	0.400697	0.604212	0.779028	0.883404	0.903951	0.854138	0.760697	0.650104	0.541391	0.444989	0.364697	0.300319	0.249748	0.21027	0.179217
31	0.198258	0.361566	0.54847	0.712949	0.816149	0.843498	0.80488	0.723387	0.623155	0.522314	0.431354	0.354562	0.292298	0.242933	0.204107	0.173404
32	0.175641	0.321445	0.490749	0.643258	0.74331	0.775678	0.747081	0.677114	0.587458	0.495119	0.410429	0.338005	0.278682	0.23127	0.193759	0.163994
33	0.153775	0.282577	0.434329	0.574134	0.669629	0.705391	0.685458	0.626185	0.546819	0.46311	0.385071	0.317514	0.261656	0.2167	0.180967	0.152557
34	0.133589	0.246575	0.381628	0.508763	0.598867	0.636684	0.624052	0.574419	0.504709	0.429374	0.357992	0.295462	0.243304	0.201063	0.16736	0.140537
35	0.115637	0.214415	0.334167	0.449258	0.533651	0.57252	0.565943	0.524824	0.463937	0.396448	0.331443	0.273826	0.225355	0.185866	0.154249	0.12907
36	0.100154	0.18653	0.292687	0.396756	0.475531	0.51478	0.5132	0.479505	0.42652	0.366191	0.307088	0.254068	0.209074	0.172196	0.142565	0.118944
37	0.0871376	0.162941	0.257326	0.351627	0.425173	0.464417	0.466987	0.439728	0.393731	0.339807	0.286017	0.237147	0.195286	0.16075	0.132884	0.110634
38	0.0764338	0.143404	0.227816	0.313691	0.382593	0.421679	0.427759	0.406089	0.366228	0.317954	0.268847	0.223608	0.184459	0.151913	0.125518	0.104381
39	0.0678076	0.127528	0.203652	0.282438	0.347385	0.386337	0.395471	0.378696	0.344221	0.300893	0.255847	0.213706	0.17681	0.145864	0.1206	0.100282
40	0.0609963	0.114864	0.184227	0.257188	0.318908	0.357874	0.369767	0.357343	0.327626	0.288622	0.247063	0.207505	0.172407	0.142658	0.118171	0.098356
41	0.0557435	0.104966	0.168914	0.237208	0.296423	0.335631	0.350116	0.341642	0.31618	0.280978	0.242405	0.204962	0.171231	0.142288	0.118224	0.098594
42	0.0518169	0.0974243	0.157123	0.221783	0.279177	0.318899	0.335908	0.331105	0.309516	0.277703	0.241701	0.20597	0.173221	0.144719	0.120737	0.100978
43	0.0490157	0.0918758	0.148323	0.21025	0.266447	0.306968	0.326502	0.325188	0.307201	0.278468	0.244713	0.210366	0.178269	0.149881	0.125665	0.105474
44	0.0471705	0.0880092	0.142043	0.202009	0.257556	0.299146	0.321241	0.323303	0.308731	0.28286	0.251118	0.217904	0.186193	0.157642	0.132908	0.112006
45	0.0461382	0.0855565	0.137873	0.196517	0.251871	0.294756	0.319445	0.324801	0.31351	0.290351	0.260462	0.228204	0.19668	0.167744	0.142255	0.120393
46	0.0457956	0.084283	0.135442	0.193275	0.248784	0.293115	0.320389	0.32894	0.320808	0.300243	0.272096	0.240678	0.209207	0.179728	0.153303	0.130284
47	0.0460311	0.0839755	0.134413	0.191809	0.247698	0.293518	0.32328	0.334861	0.329721	0.311615	0.285112	0.254456	0.222959	0.192847	0.165375	0.141071
48	0.0467368	0.0844316	0.13446	0.191659	0.248011	0.295225	0.327241	0.341563	0.339145	0.323294	0.298302	0.268334	0.236774	0.206003	0.177461	0.15184
49	0.0478019	0.0854501	0.135265	0.192365	0.24911	0.297456	0.331319	0.347921	0.347798	0.333869	0.310174	0.28079	0.249148	0.217757	0.188215	0.161368
50	0.0491085	0.0868268	0.136507	0.193471	0.250377	0.299411	0.334517	0.352729	0.354275	0.341771	0.319043	0.290083	0.258344	0.226433	0.196072	0.16823
51	0.0505298	0.0883542	0.137875	0.194531	0.251212	0.300311	0.335854	0.354798	0.35719	0.34544	0.323225	0.294466	0.262622	0.230357	0.199472	0.171019
52	0.0519332	0.0898273	0.13907	0.195135	0.251068	0.299456	0.334464	0.353091	0.35534	0.343544	0.321304	0.292494	0.260563	0.228186	0.197192	0.168659
53	0.0531871	0.0910548	0.139826	0.194929	0.249496	0.296295	0.329695	0.346862	0.347914	0.335231	0.312422	0.283344	0.251413	0.219262	0.188681	0.160711
54	0.0541714	0.0918737	0.139933	0.193653	0.246191	0.290492	0.321201	0.335792	0.334643	0.320316	0.296505	0.267058	0.235327	0.203842	0.174278	0.147565
55	0.0547896	0.092165	0.139253	0.191163	0.241024	0.281969	0.309006	0.32005	0.315889	0.299375	0.274334	0.244604	0.213414	0.183119	0.155199	0.130409
56	0.0549806	0.0918663	0.137738	0.187446	0.234059	0.270922	0.293503	0.30029	0.292605	0.273663	0.247439	0.217717	0.187535	0.158988	0.133293	0.110969
57	0.054726	0.0909796	0.135431	0.182622	0.225541	0.257792	0.2754	0.277549	0.26618	0.244904	0.217812	0.188562	0.159916	0.133634	0.110613	0.091112
58	0.0540531	0.0895703	0.132463	0.176924	0.215864	0.2432	0.255618	0.253087	0.238216	0.214991	0.187543	0.159315	0.132705	0.109083	0.0889973	0.0724482
59	0.0530309	0.0877592	0.129034	0.170675	0.205519	0.227869	0.235157	0.228205	0.210284	0.185685	0.158482	0.131802	0.107613	0.086864	0.0697653	0.0560811
