# Supplementary material for: Unexpected long-term variations of Saturn’s ring current revealed by energetic neutral atom imaging
Source: Research Square preprint supplement (doi:10.21203/rs.3.rs-3271171/v1), 2023-09-18
Supplement: Supplementary file 7 [file 3ed45cc543be2fab9804ebfc.xlsx]

## Sheet: Fig. 1a_2007
	0	1	2	3	4	5	6	7	8	9	10	11	12	13	14	15	16	17	18	19	20	21	22	23	24	25	26	27	28	29	30	31	32	33	34	35	36	37	38	39	40	41	42	43	44	45	46	47	48
0	4.44843	5.38527	4.4639	4.79981	5.89512	4.91361	5.10797	6.48098	6.54205	7.72049	10.3771	11.9572	12.8319	13.514	13.8865	14.1098	14.3288	14.5692	14.6501	15.4465	15.8541	16.1878	16.5154	16.001	16.4386	16.7012	16.6917	16.8236	17.3624	17.622	17.7806	18.28	18.1734	18.4597	18.846	19.2793	20.4896	20.4671	20.7833	20.1811	20.3604	20.7192	21.0479	21.8974	22.7869	23.2426	24.1742	24.4571	24.8956
1	4.79878	5.3547	4.97824	6.07754	6.65901	5.35792	6.07523	6.10967	7.32288	8.7981	10.1553	12.4882	12.5088	14.0208	14.0733	14.2992	14.3349	14.6493	15.3599	15.7309	16.1381	16.2062	16.6327	16.5049	16.8989	17.187	17.4907	17.3139	17.3957	18.4719	18.5621	18.6013	18.9097	18.676	19.2427	19.9116	20.4214	20.5753	21.1086	21.1172	20.8391	20.8252	21.569	21.8632	22.9889	24.3073	24.8052	25.3945	25.3949
2	5.13895	5.29817	4.98746	6.38749	6.74489	9.57451	6.85925	7.51194	8.56503	9.70532	11.3978	12.645	13.3024	13.9701	14.4503	14.5837	14.048	14.8133	15.1655	15.7333	15.8539	16.422	16.7897	16.833	16.9658	17.6394	17.6974	18.1083	18.0776	19.1112	18.8428	19.1766	19.5043	19.25	19.3347	20.668	20.6679	20.8896	21.5211	21.0418	21.1167	21.7515	22.046	22.855	23.0953	23.8052	25.1529	25.6321	26.0153
3	4.68725	5.68199	5.5708	5.27369	6.54866	9.225	8.36141	8.84775	9.29757	10.2921	11.163	12.6326	13.1391	13.8014	14.2234	14.8368	14.7589	15.2252	15.5	16.0398	16.0408	16.4589	16.9455	17.25	17.5619	17.6659	17.8099	18.4716	18.2756	18.9926	19.07	19.7867	20.4066	19.9648	20.5965	21.236	21.0423	21.362	21.8306	21.7269	21.7683	22.4699	22.5575	23.1719	24.4193	24.8057	25.171	25.6627	26.4012
4	6.47937	5.23596	6.84816	6.3157	8.32657	8.80132	9.07552	7.74038	9.77872	8.88072	11.5768	11.1804	13.038	13.8111	14.3209	14.6022	14.7911	14.8219	15.7266	15.8588	16.7365	16.5445	16.7951	17.7268	17.5575	17.7871	17.5483	18.1828	18.0813	19.1684	18.9824	19.6083	20.7924	20.8939	20.9874	21.4077	21.2856	21.7619	21.9165	21.9326	22.2538	22.9453	23.1214	24.623	25.672	26.6737	26.6885	26.3372	26.7302
5	4.87093	5.79231	7.37747	5.77456	7.76179	9.5192	10.3998	9.79088	9.48042	8.66536	11.1706	11.2592	12.8929	12.8649	14.1484	14.6354	14.7628	14.7469	15.2592	16.1335	16.6851	17.0017	17.1542	17.7301	17.6904	18.1961	18.2699	18.3996	18.1694	19.1719	19.2589	19.4871	20.0254	20.7363	21.1292	21.7911	22.0075	21.8907	21.8679	22.9642	23.1708	23.6163	24.0257	25.7322	26.0347	27.0188	26.9178	27.3349	27.5567
6	4.30265	5.39	6.11238	6.52033	6.47695	8.05589	11.7643	10.1037	10.1202	9.8455	11.1631	12.38	11.8349	13.5925	14.1397	14.5195	14.8055	14.6747	15.3136	16.1035	16.389	17.135	17.2441	17.8454	18.4794	18.5339	18.8863	18.5858	18.6333	19.3691	19.6613	19.8552	20.0427	20.6596	21.434	22.0997	22.2173	22.5572	22.3024	22.8205	23.7477	24.49	24.4701	25.9263	26.6096	27.2135	27.2964	27.9986	28.0242
7	4.32454	5.12826	6.17906	6.43119	7.43467	10.7737	10.9039	10.8542	12.0823	9.19379	11.617	13.3515	12.167	13.595	14.2519	14.711	14.8759	14.8348	15.3348	16.3904	16.8643	17.1817	17.8692	18.0548	18.5956	18.9279	18.9615	18.8451	19.2697	19.6283	19.5055	20.4784	20.4716	21.0401	21.7314	23.5278	22.5751	22.74	22.3372	23.3749	24.1014	25.4367	25.4135	26.7067	27.1983	27.8825	28.6181	29.2964	28.2914
8	4.73935	5.83328	7.08079	6.63469	7.29397	9.85311	12.0411	12.0873	11.6037	12.7633	12.318	13.1341	13.5947	13.9059	14.5496	14.7421	15.2337	14.9843	15.4373	16.1158	17.1291	17.376	18.1147	18.3298	18.9726	18.911	19.3642	18.8863	19.4736	19.7186	20.3605	20.7067	20.7489	22.0161	22.1174	23.3068	23.2999	23.5279	22.6264	24.1778	25.6703	26.132	26.2926	27.7469	27.8084	27.8046	28.6353	29.6118	28.8725
9	4.98319	5.61873	7.26626	7.93852	8.22662	9.38391	11.3381	12.2762	12.0932	13.1967	13.2562	13.6276	13.94	14.237	14.9304	15.3608	15.4191	15.6864	15.8545	16.1566	17.3483	17.9001	18.2735	18.6262	18.9393	19.8473	19.5084	19.1372	19.946	20.4497	20.5978	21.3313	21.3897	22.0822	23.1818	23.6021	24.716	24.2924	24.2958	25.5027	26.1574	26.4829	26.4996	27.7041	28.3592	28.5068	29.6216	30.0403	30.2455
10	5.59222	6.1386	8.32905	9.20999	8.97596	9.8507	11.9903	11.3699	12.2427	13.5039	13.2845	13.5997	14.3958	14.4994	15.0048	15.7094	15.879	15.8706	16.3441	16.3472	17.3984	17.9558	18.4797	19.1365	18.9784	19.401	19.7716	20.0626	20.7363	21.0644	21.3509	21.9161	21.9477	23.4527	23.571	24.7437	25.2368	25.6762	25.5144	25.9366	26.9566	27.1146	27.2823	27.9364	28.5129	29.264	30.4077	31.0433	31.2956
11	5.28557	6.75507	7.50628	8.19661	9.15475	10.7467	12.5159	12.4725	13.1053	13.486	13.5839	13.6664	13.9733	14.5466	15.2561	15.9019	16.5509	16.4237	16.5701	16.5157	17.025	18.4188	18.4646	19.4194	19.8621	20.3994	21.3613	20.0492	21.0685	21.5063	21.997	22.9743	22.7946	23.9082	24.2959	25.2117	26.4165	25.9759	26.6339	25.9343	27.41	27.9287	27.562	28.2558	28.8338	29.4253	30.4225	31.7046	32.0532
12	7.64497	7.64902	9.44287	8.81443	9.67837	11.7858	12.1492	12.999	12.451	13.3441	13.9632	14.5759	14.6033	14.9953	15.1528	16.1505	16.4251	16.6989	16.7129	17.0653	17.393	18.217	19.1547	19.8195	20.0743	20.9306	21.6294	21.9123	21.6363	22.1847	22.135	23.0364	23.2648	24.1101	25.2181	25.7332	26.9924	26.8771	27.3214	27.793	27.911	28.4077	27.9853	28.718	29.7386	30.0405	30.898	31.7602	32.126
13	7.14032	10.1843	9.63022	10.164	11.0017	11.9732	12.11	13.2067	13.1101	12.9083	13.6811	14.3527	15.4804	15.676	15.9192	16.3612	16.7328	16.8431	17.1146	17.2455	18.0159	18.5532	19.0397	19.7341	20.657	21.2551	22.3502	22.7619	22.6676	23.0779	22.8663	23.0752	24.1615	24.8253	24.8681	26.1542	27.2754	27.3977	27.868	28.0363	28.615	29.1567	28.6241	29.3354	29.827	30.0825	31.9018	32.3757	33.0211
14	7.82543	10.5999	9.1802	10.2879	10.6228	10.9691	11.8759	12.6827	13.347	13.1947	14.0945	14.221	15.1689	15.437	16.1371	16.4163	17.0789	17.1588	17.7581	17.5376	18.4005	19.0118	19.5113	19.5927	20.59	22.0198	22.9556	23.6944	23.4218	24.5163	23.235	23.8404	24.9142	25.6238	26.2697	27.1916	27.8968	27.9918	27.9935	28.4378	29.5427	29.9316	29.7504	30.0761	30.7385	30.873	32.2418	33.013	33.6703
15	6.00312	8.95015	9.72184	11.1155	11.733	11.0429	10.9581	10.7628	12.8007	13.3987	13.8516	14.3749	14.8952	15.7455	16.0556	16.4893	17.0779	17.4652	17.813	18.3407	18.6726	19.0673	20.3699	20.3614	21.4436	21.7332	22.9938	24.4063	24.2848	25.0857	23.6427	24.987	25.4727	26.9549	27.4458	27.9245	28.4222	29.0322	28.8841	29.5479	30.1279	30.766	30.6241	30.7687	31.4596	32.3023	33.5879	33.82	35.1471
16	6.13238	7.41541	10.1259	9.58024	12.0611	11.611	12.4057	12.6034	12.2188	13.2588	13.252	14.4424	15.0985	16.0411	16.3013	16.5775	17.1191	17.4668	17.9159	18.4795	18.7621	18.9994	20.4227	20.6498	21.38	21.6609	23.8475	24.5173	25.2058	25.901	24.8838	25.0773	26.1146	27.3071	27.968	28.2261	29.3676	29.6858	30.1338	30.0056	30.6599	30.9858	31.4913	31.5716	32.4709	32.8699	35.293	36.24	37.1277
17	7.07656	6.57137	9.56659	10.0686	11.3264	12.4509	12.4605	12.5419	12.7892	13.1765	13.6475	14.3164	15.2097	15.8402	16.1549	16.7358	17.0692	17.7738	18.2248	18.5583	18.9976	19.4867	20.6632	20.6752	21.6024	22.2264	24.2372	24.9938	25.966	26.4535	26.1946	25.9088	26.8393	28.1077	28.9914	28.9292	29.8498	30.4689	30.6609	31.1697	32.3254	32.4866	33.3995	33.5626	33.9629	34.5349	37.9031	38.4864	38.387
18	8.00761	7.65277	8.71091	10.088	11.6688	12.4086	12.808	12.851	12.7865	12.938	13.6077	14.6069	15.1062	15.7708	16.401	17.0329	17.4013	17.9452	18.5263	19.1558	19.3383	19.9634	21.1228	20.8701	21.83	22.6015	24.5079	25.395	26.3684	26.5674	26.8217	27.3542	28.1422	29.2499	29.5363	29.9348	30.5762	31.2194	31.6288	32.0288	32.8208	34.1814	34.5244	35.1088	35.9311	36.3724	38.3281	39.4098	39.7499
19	6.49383	6.59466	8.48041	9.18701	10.8254	12.543	13.2669	13.4777	13.0627	13.4782	13.5248	14.5403	15.1964	15.8179	16.8852	17.2611	18.0962	18.4057	18.7271	19.2355	20.3573	21.0194	21.3084	21.4666	21.7662	22.8981	25.0564	25.7625	26.8122	26.9843	27.1065	27.3209	28.6106	29.5775	30.3046	30.5422	30.9023	31.1981	32.234	32.7819	34.9959	35.7449	36.1863	36.0158	36.8578	37.0532	38.6838	40.3832	41.3167
20	7.2602	5.71249	6.12855	8.55603	10.042	12.7762	13.1274	13.9595	13.7832	14.1966	14.2958	14.7483	15.146	15.9803	16.8962	17.0596	17.8693	18.4223	19.1825	19.7037	20.4234	21.0968	21.2837	22.2545	22.3049	24.8666	25.3739	26.3469	26.798	26.9714	27.4931	28.1432	28.9264	29.7598	30.1092	31.1034	31.7293	32.0733	33.1223	33.908	35.3814	36.7505	38.1481	37.9167	37.8567	37.9571	40.2067	41.5643	42.3829
21	6.30794	7.27223	7.61088	10.0188	10.5569	12.9461	13.4851	13.8897	14.1032	14.1741	14.5338	14.8548	15.3873	16.0569	16.6286	17.541	17.6453	18.318	19.0939	19.3154	20.9679	21.9373	21.4951	22.6835	23.606	25.5777	26.7255	26.95	27.5997	27.6777	28.4738	28.5956	29.7766	30.5412	30.9675	31.4787	32.5295	33.4659	34.0593	34.7035	36.3141	38.3925	39.2494	39.7771	39.6392	39.1342	41.832	43.226	43.8803
22	6.48382	8.82465	8.47835	10.0433	11.1842	12.7898	13.7564	14.1546	15.0171	14.7949	14.5166	15.5045	15.6584	15.7704	16.8959	17.6192	17.9873	18.4195	18.6198	19.2521	20.5147	20.7652	21.7462	21.78	24.3928	25.6128	26.8034	27.8686	28.1811	29.4123	29.2322	29.1977	29.875	30.9809	31.8941	32.2441	33.0472	34.0232	34.9752	35.7801	38.5701	38.8882	40.0947	40.7285	40.6814	40.5487	42.9084	44.423	44.3346
23	6.71228	8.91523	11.78	10.9144	12.5431	12.6873	13.7357	14.188	14.6523	15.2105	15.2801	15.6126	16.1964	16.6509	17.1956	17.4669	17.7176	18.7219	19.0138	19.4293	20.3831	20.9362	22.3529	22.8274	23.4728	25.8486	26.7136	28.1848	29.177	29.828	30.2536	30.3336	31.1421	32.1523	33.093	33.6256	34.0684	34.8331	36.8735	36.0705	38.2402	39.9795	40.9375	41.2898	42.2046	41.8966	43.2232	43.9991	45.1452
24	7.90502	7.29888	9.66594	11.1073	12.6804	13.4687	13.9073	14.3948	14.3258	15.3182	15.2425	16.0103	16.1885	17.2792	17.7555	17.8564	18.0059	18.6257	19.1225	19.3799	21.1923	21.138	21.1036	22.7305	23.6663	25.3678	26.9033	28.5488	29.2215	30.3145	30.8459	30.9986	32.8269	33.8561	34.1936	34.7812	35.2713	36.1311	36.6079	38.0166	39.1188	40.5977	41.3623	42.2228	41.693	42.1485	43.1269	44.711	45.3759
25	7.36347	8.07223	10.3992	10.2743	11.7678	13.2536	14.1938	14.8795	15.0004	15.3178	15.9347	16.126	16.4833	17.5386	18.0704	18.6409	18.4906	18.4873	19.6509	19.9348	21.0599	22.065	22.78	22.5935	23.5704	24.8037	26.2666	28.0182	29.5484	30.4547	31.1075	32.3647	33.9829	35.2075	35.6465	35.5716	35.7721	36.4243	37.8584	38.9592	38.7158	40.7022	43.23	44.0668	44.1894	44.0894	44.6796	45.6423	46.5711
26	5.64097	6.40649	9.50009	9.63898	11.6595	11.7312	13.9524	14.5218	15.2515	15.1949	16.2525	16.4583	16.9934	17.4216	17.8734	18.7215	18.8481	19.722	19.8055	20.8884	21.1618	22.0878	23.0079	23.415	24.235	25.166	26.1959	28.1866	29.5421	30.5138	30.8587	32.4125	34.31	36.1702	36.9571	36.0276	36.6427	37.872	38.7753	40.4692	40.5469	43.246	43.7793	45.0398	45.5281	45.7187	46.0437	46.1496	47.1248
27	5.63531	6.57494	7.01548	9.58418	10.0237	11.4853	13.7151	14.1206	14.9759	15.2889	16.5757	16.9232	17.1855	17.5494	18.2785	18.9859	19.2063	19.9113	20.3671	21.1673	21.6595	23.0163	23.7728	23.7427	25.4481	25.7712	26.2119	27.7131	29.3163	30.5459	31.8247	32.6251	34.6579	36.2609	37.5445	37.8026	38.595	38.8742	40.6476	40.0642	41.3928	43.1473	44.2676	46.0103	46.4824	47.6413	47.5195	47.152	47.4802
28	5.87587	6.90811	7.32056	9.44242	10.8626	12.7685	13.0931	14.3865	15.3649	16.1082	16.5685	17.5065	19.0993	19.181	19.271	19.9775	19.8661	19.9778	20.8999	21.2487	22.0686	23.3712	24.8707	25.8768	26.6343	26.9618	27.0782	28.1224	29.1713	30.0965	31.8485	33.1767	34.8146	36.7544	37.5273	38.1644	39.9605	39.3202	41.3717	42.1247	42.9254	44.5028	45.0783	46.2607	48.5548	49.6458	49.8523	49.1329	48.5675
29	6.81683	6.98173	9.31287	8.6027	9.76305	13.1554	13.2758	14.0381	15.1526	15.6917	16.9372	18.265	19.4179	20.6275	20.1335	20.4334	20.8656	20.6884	21.3941	21.7996	22.9922	25.3296	26.2827	27.1589	27.3643	27.5016	27.3708	28.4184	29.7287	31.5283	32.1146	33.633	36.2928	37.3863	37.7776	38.7524	40.9893	41.2359	42.5342	42.7249	43.3787	44.7537	46.0266	46.7807	48.1239	50.2358	51.0846	49.8602	49.8487
30	6.17199	7.38559	9.03719	9.36756	10.716	12.9167	13.3713	13.9855	14.6474	15.5757	16.4435	18.333	19.4232	20.831	21.1685	21.4682	21.0604	21.6283	21.9284	22.7243	23.1807	25.2228	26.7192	27.6292	27.9346	27.6352	28.376	29.0511	31.1212	32.1372	33.8458	35.0438	36.3415	38.0027	38.937	40.8868	42.2079	42.2723	43.3783	43.4528	44.2402	45.1236	46.5379	47.6015	48.9088	51.347	52.2825	51.2486	52.1526
31	5.88707	8.1661	7.31866	10.5654	11.8078	13.4066	14.1335	14.5286	15.4361	15.8416	16.498	17.8763	19.2329	21.0904	20.9792	21.76	21.3463	21.1011	22.6027	23.2421	23.6404	24.9284	26.6541	27.8925	28.3972	29.0296	29.3296	30.0793	31.5547	33.4551	34.2659	35.2676	36.7159	38.0269	39.3218	41.8916	42.6568	43.7689	44.5298	45.1969	45.2546	45.5406	47.4062	48.7447	51.3119	52.336	52.0308	52.8174	54.4706
32	5.9189	6.56196	8.23306	9.36928	11.9752	13.7739	14.6481	15.369	15.8114	16.4443	17.0782	18.0545	20.1095	21.4438	21.5047	21.8637	22.1262	22.5173	23.0175	23.2948	24.2927	25.3985	26.756	28.0027	28.4116	28.7433	29.7677	30.386	31.5774	33.4522	35.108	35.8071	36.4752	38.5555	39.9789	41.6107	43.8383	45.0059	45.6002	45.8854	46.7234	46.7285	48.3737	49.0807	50.9901	53.1018	53.7509	54.4973	55.3389
33	5.62361	6.28018	8.49773	9.44401	12.7887	13.8134	15.1942	15.4645	15.8072	16.1912	17.107	17.9571	20.1511	21.64	21.9283	22.2196	22.2303	22.6154	23.8421	24.4133	25.3796	25.7362	26.2233	27.7653	28.6115	29.512	30.2962	31.002	32.591	33.2339	35.9875	36.4132	37.6495	38.7984	40.8133	43.5927	45.6478	46.4339	47.2137	48.7836	50.1539	49.4269	49.7233	51.4588	52.0213	53.2188	55.1069	55.2064	57.7857
34	5.60404	6.37591	7.56075	9.77431	11.117	13.8154	15.0851	15.7246	16.1571	16.4471	16.8124	17.556	18.5918	20.1291	21.4116	23.0295	22.9981	23.271	24.0799	25.4312	26.0188	26.8481	26.0758	27.5518	28.9591	29.649	30.3226	31.6899	32.9075	33.8914	34.9146	36.707	38.8986	40.0743	41.2861	43.8565	45.1483	47.3416	49.3464	50.5515	51.7947	51.7526	52.3922	53.6219	53.2118	55.0503	55.7708	57.6968	58.1918
35	6.29804	6.53034	7.43968	7.87021	12.0445	13.7828	14.9282	15.7289	16.1945	16.8477	16.7351	17.7105	18.1325	19.5196	20.8414	22.8409	23.1024	24.1704	24.65	25.7333	25.919	27.2901	27.3098	28.0722	29.5797	30.1225	30.9051	32.4998	32.8594	34.2153	35.9809	37.2258	39.8818	41.1434	43.2512	45.5578	46.4347	49.101	49.5192	51.5204	52.7812	53.7785	54.046	54.4862	55.0521	57.8833	57.5008	58.2973	59.2654
36	5.7325	7.16209	8.69496	8.59282	11.249	13.2478	14.6641	15.8442	16.441	16.7263	16.8195	17.5478	18.372	20.5214	20.9801	22.567	23.3298	24.4445	24.7817	25.9879	26.7262	27.6865	28.1752	28.6904	29.8244	30.9467	31.8041	32.2519	33.3272	34.9564	37.8381	39.8522	41.1472	42.4287	44.074	45.5337	46.8679	49.62	50.996	51.845	53.143	55.2432	56.9082	57.6545	57.2644	58.1938	59.7317	60.3183	61.0164
37	5.44108	6.22513	7.74555	8.73633	9.01006	13.1863	14.2177	15.3374	16.3077	16.9039	17.1477	17.5858	18.7916	19.5804	21.5459	22.295	23.8179	24.6236	24.3076	25.274	26.3049	27.3912	28.8029	29.8654	30.9247	31.3293	32.304	33.0595	33.3814	35.3472	37.1331	40.8767	42.3602	43.3921	45.536	46.5505	49.2111	50.8794	51.979	53.8995	54.7238	56.5964	56.5542	57.9541	58.454	59.8799	61.4719	62.1847	63.0673
38	5.63078	5.95729	6.97409	8.1045	9.86032	12.3205	14.307	14.6217	16.1934	17.0237	17.5461	17.7591	18.5641	19.3906	21.56	22.482	23.3803	24.33	25.0348	25.5388	26.6433	27.5374	28.5606	29.677	31.7145	33.0631	34.1109	35.2199	35.0448	37.0119	38.0253	39.6532	42.3955	44.269	46.431	48.4814	50.4849	53.3003	54.3534	56.3706	57.5171	58.0909	58.5151	59.9213	60.8993	62.3704	64.4721	64.527	65.1853
39	5.77024	6.11311	8.34908	9.1583	10.7291	12.232	14.0221	14.1221	15.5305	16.4347	16.8214	18.1666	18.2763	19.0911	20.5561	22.1789	23.403	24.4997	25.673	26.2438	26.2122	27.5002	28.4667	30.1121	32.0562	33.3907	35.1315	35.8964	36.0079	37.5098	40.0527	41.3245	44.2536	44.972	47.9791	49.3567	51.5028	53.3916	55.9419	57.9045	58.4612	58.7033	59.8165	61.7754	63.1136	63.8215	64.9372	65.3958	67.6214
40	6.13855	6.46188	7.80697	10.0782	12.5607	13.3508	14.2463	14.1237	15.1833	16.2482	16.8645	17.4044	18.1264	19.5195	20.8083	22.1007	23.9973	24.5468	25.0604	26.3278	26.9279	27.1362	28.778	29.9722	31.5338	33.2894	35.1884	36.6636	37.1422	38.6528	41.6984	42.1961	44.459	46.5431	49.2476	50.8569	53.0197	55.031	57.1325	58.3077	59.4711	61.1297	61.5514	62.6183	63.8827	66.0415	65.7047	66.9366	69.3412
41	6.1221	6.60055	8.03522	9.21613	10.8742	13.0567	14.6307	15.0096	15.3743	16.1524	16.7751	17.5049	18.6649	19.4763	20.3902	21.7368	24.2705	25.0067	26.8439	26.7441	27.5604	27.7287	29.0796	30.2068	31.6502	33.9232	34.9954	36.8631	38.6717	40.2815	42.0289	43.2522	45.5523	48.4026	51.2444	52.8903	54.2429	57.8025	58.4835	59.9396	60.903	62.3747	63.1578	64.8149	66.4719	67.348	70.3103	69.8583	70.0841
42	6.70099	7.55991	8.40783	9.3621	11.4582	13.2971	14.4792	15.5254	15.5467	16.161	17.2676	18.4178	18.9413	20.2464	21.224	21.8952	24.8339	26.2863	27.0046	27.6296	27.7162	28.4655	29.1654	30.8372	32.3083	34.6918	36.1245	39.2058	39.5686	40.8648	43.2662	43.7927	45.2988	49.2207	52.0989	53.3557	54.4937	57.8106	59.4886	61.2313	62.1255	64.8786	65.0304	66.1413	69.1441	70.9861	71.2464	69.9588	70.9495
43	6.21558	6.92319	8.35678	9.04199	11.706	13.9712	14.9514	15.473	16.2894	16.5167	17.0089	18.2486	19.4664	19.983	21.1543	22.7702	24.3795	25.7659	27.1804	27.8935	28.5725	28.8293	29.3529	31.2996	32.4327	35.0676	36.3609	38.7578	41.0612	42.8743	43.8264	44.2365	46.0832	49.1441	52.3925	53.7163	56.0496	58.1741	59.8936	61.9122	64.8154	66.8358	66.466	68.1514	70.0365	71.8755	72.1025	72.5681	73.1014
44	5.98874	6.23204	7.39029	8.70781	9.95595	12.6014	14.4947	15.2564	16.1599	16.8143	17.2695	18.2793	19.1811	20.1079	21.7963	23.7527	24.7916	26.1412	27.0783	27.7478	28.4705	29.2984	30.1112	31.4609	33.3661	35.6568	36.261	39.3513	41.4269	42.7674	43.3027	44.8562	46.5716	49.0661	51.843	53.66	56.9395	60.1646	62.5504	63.7626	65.8588	67.0634	68.8065	69.1035	71.3508	71.5397	72.1929	73.5593	72.0083
45	6.04518	5.99474	7.10139	7.89778	9.77229	12.4819	14.4917	15.1958	15.77	16.6649	17.3908	17.6895	19.2201	20.6889	22.4324	23.9082	25.3159	25.1592	26.6496	27.3585	28.5966	28.9504	30.3214	31.0522	33.0503	35.1451	38.0051	38.4746	40.9819	43.5841	44.2063	46.5698	49.6725	52.1141	54.8019	56.5311	58.435	60.447	63.1436	66.0793	66.3882	69.9221	72.5575	72.3451	71.4067	72.6561	73.1535	74.9699	72.4644
46	6.26706	6.29722	7.18468	8.15856	8.23955	10.3821	14.4006	15.1989	15.7194	16.933	17.4982	17.9305	19.1887	20.8484	23.041	23.582	25.301	25.5207	25.7389	26.8063	27.7776	28.6034	30.1917	30.9798	33.1062	35.6024	37.2246	38.8234	42.0864	45.5495	47.2058	48.444	49.9113	52.6338	56.204	58.2363	60.4387	61.3998	64.2562	66.6372	67.5677	71.8735	72.5625	73.7066	73.2482	72.8145	74.7335	74.9147	72.0193
47	6.03527	6.14599	6.46519	7.10977	9.10098	10.5994	13.3679	15.4339	15.4292	16.4333	17.1691	18.2987	19.3749	20.9329	22.2287	24.442	25.5844	25.7841	26.2411	26.5136	27.6114	29.078	30.1528	30.8619	33.4971	34.9293	37.7195	40.1387	42.1882	45.3828	47.3535	49.3644	50.9015	54.1136	57.303	59.8612	61.7761	63.2153	66.4288	67.4721	68.3557	70.0558	72.8067	73.3027	74.1937	74.0875	74.5324	73.675	73.2182
48	6.06031	6.08448	6.21547	6.55261	8.05997	10.0881	14.0145	15.0718	15.7361	16.9123	17.4108	18.2806	19.0942	20.2832	21.8564	23.5201	24.6982	25.9846	26.0838	26.5575	27.4618	28.1194	29.6894	31.0486	33.2496	35.5476	38.1012	40.3528	41.8303	45.1652	46.7454	49.8353	52.0395	53.9604	56.3513	60.3104	63.6471	64.654	68.2001	69.3781	69.9675	73.1487	74.2361	75.0614	76.8379	76.0634	73.3141	73.5265	72.05
49	5.92596	6.02297	6.04748	6.77797	8.59983	9.39197	11.7766	14.6929	15.5064	16.091	17.1053	17.9713	19.399	20.5208	21.7506	22.7864	23.281	24.7885	25.849	27.1967	27.3578	28.6868	30.2546	31.7332	33.3501	34.7642	36.2434	38.5732	40.605	44.3118	46.9527	50.9861	52.7466	55.0406	57.8027	61.4641	64.9907	66.9839	69.6053	70.7383	70.3182	73.2083	74.3366	77.0353	77.7429	76.1887	73.9836	72.7052	71.4703
50	5.92525	6.21547	6.27787	6.68986	8.13239	10.7096	12.4547	14.8064	15.2266	15.6578	16.8155	17.3588	18.3199	19.9913	21.2486	22.2448	22.5282	23.2968	24.8597	26.7062	27.6799	29.4309	30.4329	32.2621	33.8224	35.4688	37.5024	38.7568	41.1201	44.3513	48.4935	51.8492	54.5071	56.5948	58.6614	62.3343	65.6094	68.73	70.9107	73.5623	74.0858	74.1777	74.6171	76.273	76.4906	75.29	74.6961	73.4346	69.7903
51	5.91449	6.20232	6.70018	6.77721	7.1943	9.4564	10.6324	13.4241	15.0889	15.7084	16.5712	16.9496	17.3312	18.7627	20.3334	22.068	22.4725	23.1923	23.6851	27.1345	28.3477	29.2558	31.0023	32.7105	34.4971	36.9793	38.4518	39.6937	41.3699	44.0245	48.9333	51.9938	53.7868	57.0812	58.5036	62.3593	65.2593	69.2556	71.7354	74.8317	75.1083	74.8792	75.1909	76.1403	76.6478	75.8488	74.8334	72.3607	67.5609
52	5.96908	6.35008	6.63396	7.30987	8.26691	8.45283	10.5596	11.7253	14.9576	15.6247	16.6392	17.2409	17.7811	18.5858	20.3836	21.6506	21.9178	22.2706	24.6678	26.6927	28.2778	30.0548	31.5797	33.0908	35.5015	37.204	39.47	41.4881	43.3929	45.7183	49.8879	51.7549	55.8951	57.0403	60.3327	63.8138	66.0666	69.4552	72.4708	75.0175	76.2036	76.2743	77.7715	77.4495	76.7286	77.0177	74.4651	71.4869	67.3919
53	6.09189	6.21547	6.91084	6.94577	7.4407	8.66941	9.40785	12.8123	14.7948	15.3789	16.3199	17.5019	18.7906	19.1245	20.5854	22.5538	22.2072	22.9723	23.5129	25.593	26.9923	28.7017	30.8141	32.5841	35.2108	36.0941	38.9551	40.8801	42.9108	46.3877	49.5259	53.8045	56.6808	58.8881	61.2486	64.4687	66.8325	70.5516	73.2277	74.7588	76.1287	77.3621	78.6302	78.9807	78.2629	75.8211	73.4607	69.9648	67.6787
54	6.20286	6.38702	6.39081	6.69184	6.99348	7.69722	7.94116	10.6714	11.6391	12.9519	16.0429	17.1592	18.6783	19.629	21.1204	21.7293	23.2094	23.5889	24.6508	26.4665	28.312	28.7779	30.4455	31.6598	33.7635	34.9176	38.5788	41.1364	42.9602	46.0591	49.3069	54.2739	57.2339	60.3197	61.9573	64.6213	66.5147	69.1541	72.1813	74.9533	76.9647	77.1248	77.7602	78.6423	77.5872	74.689	70.9451	69.5791	66.3558
55	6.14057	6.67225	6.70052	6.94914	7.63221	8.52672	9.03984	10.276	11.8346	12.3242	15.7266	16.7662	18.4217	19.7599	20.4996	22.1082	23.3084	23.7285	24.7624	26.6523	27.9086	29.7899	31.5551	32.728	34.1181	35.0025	38.259	41.7026	43.2939	46.668	50.0913	54.5388	58.3435	60.7294	62.6892	64.5974	67.3207	69.7958	72.9259	73.6556	74.9205	74.7337	76.5073	76.3397	76.6311	74.9253	71.1913	69.0289	66.1154
56	6.57515	6.70115	6.68719	6.87369	7.26803	7.84349	8.01569	9.95343	11.2139	14.1428	16.4058	16.8934	18.6103	19.8334	20.8825	22.74	23.7628	24.3247	24.9139	25.8737	27.9912	29.6718	31.1198	32.9945	35.0286	36.6402	38.5766	41.3988	43.4075	47.5035	51.2151	54.5281	57.8259	60.2569	61.8168	64.9937	67.5324	68.753	70.8775	73.4276	74.9059	75.0338	75.4086	75.1404	74.0276	74.0304	70.6669	68.2213	64.5366
57	5.99118	6.33257	6.27002	6.50231	7.00792	7.6632	8.23444	9.79826	12.1116	13.7102	15.9165	16.467	18.1969	20.0934	21.3478	22.0363	23.3654	24.0219	25.2413	26.3821	27.9742	29.2536	30.8904	32.1618	33.055	35.2474	38.6711	40.7161	43.3005	46.4856	50.2266	53.2303	55.5989	59.2593	61.5861	64.7253	67.4876	69.7339	73.1654	73.8246	75.5755	75.1735	74.9198	74.0741	74.6317	74.8394	69.2826	66.9435	64.571
58	5.94298	6.06801	6.17832	6.29675	6.5512	7.06149	8.61385	10.0507	12.2151	13.1367	16.2286	16.5504	18.0016	19.8657	20.9518	22.4294	22.3034	23.8805	26.2033	27.1374	28.1826	29.3029	31.0725	31.868	32.763	35.226	37.6103	40.4301	43.7995	46.3146	49.1399	53.3285	55.8148	59.8189	61.3358	64.2801	66.8234	69.7223	72.4318	73.8583	75.4579	75.2451	75.3029	74.9553	74.6349	73.7537	68.5683	66.3327	63.0613
59	5.81493	5.83742	5.941	6.04478	6.81065	6.88434	8.55065	11.4187	11.6635	13.7864	15.9111	16.5763	17.1518	19.2768	20.49	22.4316	22.9827	24.4707	26.4324	26.999	27.5719	28.357	29.3662	31.4832	33.3631	34.6247	37.5503	41.1781	43.7547	44.7454	49.3125	54.2743	56.8831	58.8911	62.113	63.8547	67.9292	69.6141	71.0099	72.3626	75.2843	75.9379	74.7878	74.0302	74.1624	73.003	70.2983	66.4908	62.6967
60	5.87036	5.90278	5.77607	6.04741	6.26733	7.57434	9.09832	10.4332	12.6731	13.9579	16.0309	16.9574	17.6726	18.6718	20.0316	21.5769	23.4631	24.6967	25.6388	27.1368	27.9565	29.0768	29.6231	31.1307	33.5803	35.8543	37.5068	38.9221	42.0536	45.6949	49.1403	53.1872	56.0993	59.1768	61.1332	64.0948	67.2343	68.7372	71.1246	71.9275	73.56	74.5886	74.0241	73.5439	73.2003	72.0354	70.1822	68.1156	64.2892
61	5.6639	5.8667	5.8388	6.02023	6.37444	7.74063	8.95428	10.2048	12.4023	15.313	15.989	16.6201	17.2285	17.9852	19.5212	20.2493	21.7137	24.8568	25.5617	27.1327	27.2735	28.7208	30.4963	32.0763	33.6409	36.2624	38.1816	40.5029	41.6882	44.9287	48.1459	51.7404	54.9485	58.3858	61.0577	63.1837	66.9768	69.303	71.6361	73.2037	73.8934	74.1145	72.368	73.221	74.926	73.0713	69.8851	68.6149	64.4475
62	5.97039	6.20935	6.08651	6.12601	6.59135	7.90346	9.89065	10.2339	11.9752	14.0965	16.0809	16.8172	17.3123	17.9064	19.2919	21.0233	21.4933	23.6582	25.4864	26.5428	27.0947	28.6396	30.0747	31.7024	33.8746	35.4797	38.7837	41.1726	42.192	45.7379	47.8668	51.1507	54.3367	58.7803	59.9895	61.9804	65.898	69.7758	72.5043	73.0344	73.903	73.9455	74.2414	73.8076	74.4655	73.9595	71.3932	69.1559	65.6268
63	5.84517	6.00401	5.94478	6.09153	6.27129	7.25616	8.66918	9.61163	11.8678	13.6668	15.2633	15.9576	16.8439	17.8072	18.8752	19.9933	20.7656	22.8626	23.4942	26.325	27.5622	28.698	29.745	31.1486	33.9355	36.374	38.7186	41.2982	42.6017	44.3327	47.7476	51.2117	52.8555	57.2738	61.2487	62.62	64.4197	69.9286	72.3564	73.1746	74.127	73.5878	74.5305	74.6633	75.3615	73.8055	69.4974	67.2376	66.4149
64	5.67856	5.84585	6.0781	6.14849	6.47729	7.38742	7.68686	8.8803	11.1419	14.6829	15.5057	16.508	17.3263	18.0389	18.7037	19.956	20.8298	21.6416	23.9882	24.6867	26.0174	27.2908	29.1511	30.8776	33.1199	34.7813	38.0238	40.4436	42.5703	43.558	47.3361	51.7571	55.495	56.5133	58.8946	62.6432	65.5511	67.805	71.1963	73.14	74.3944	75.5489	77.3607	75.7302	76.2974	74.8664	70.2243	68.3688	65.8847
65	5.73807	6.07306	6.21338	6.36582	6.40956	7.23054	7.25932	7.51207	8.86368	11.3307	14.2293	16.0877	17.1613	17.8164	19.4503	20.6461	22.5093	22.9861	23.7862	24.0404	25.2742	27.0333	28.5761	30.3189	32.8517	34.5362	36.677	38.4019	41.5679	44.0605	47.5435	49.7603	53.5201	55.4334	58.6422	62.6278	66.2896	68.1848	70.9185	72.2685	73.0509	74.3165	76.8597	78.4634	76.1601	74.3793	71.4092	70.1852	68.0688
66	5.37802	5.87698	5.9373	6.1235	6.34787	6.52778	7.34705	7.59131	7.91796	8.84289	12.2252	15.1192	16.6172	17.7421	19.1234	20.5159	21.5918	22.58	23.4048	23.2536	24.6778	26.3302	28.0243	29.3069	31.9852	33.965	35.8329	38.5347	40.9795	43.889	46.6765	48.7271	51.9061	54.4767	57.5609	62.2597	65.7209	66.3309	70.4823	72.2289	73.1994	72.705	76.6993	78.1624	76.2882	74.0843	72.4048	70.12	68.8776
67	5.1029	5.44534	5.7184	5.86272	6.14531	6.40311	7.14524	7.64396	7.56388	7.94223	9.98164	14.6416	16.7113	18.2927	18.9824	20.2561	20.9156	22.0849	22.7728	24.0618	24.3491	25.0332	26.827	28.7679	31.0658	33.0263	35.3471	38.1266	40.5453	43.661	45.9231	48.4324	51.615	53.811	57.1952	61.1391	63.4296	66.3753	68.5212	69.6021	71.3238	72.8272	76.5051	76.9151	78.4116	76.5501	74.5027	71.7948	70.2239
68	5.12535	5.40985	5.4498	6.08646	6.27559	6.47608	6.61304	7.54562	7.49392	8.35942	10.4348	12.9162	16.6036	18.068	19.1433	20.2659	20.8475	21.7331	22.8502	23.5512	23.4688	23.562	25.6942	28.3073	29.9455	32.4441	34.5944	38.4574	41.0037	42.9895	44.9074	47.5681	52.0429	54.9345	56.9181	58.9918	61.1381	64.8366	67.7985	68.76	69.9042	72.5233	74.8528	74.7578	76.1513	75.7126	75.1719	71.9722	70.7719
69	4.99137	5.56387	5.543	5.82436	6.11074	6.30251	6.47237	7.05787	7.66599	9.29398	10.2809	14.4209	17.0553	17.3307	18.0574	19.0344	19.8956	20.2329	21.613	22.4102	22.824	23.6461	24.2759	26.6926	28.6093	31.4375	33.5046	36.6112	38.6954	41.8832	43.8054	46.6858	49.8686	53.0926	54.8175	58.6706	59.6558	62.352	64.9257	68.485	70.4268	72.1934	72.7659	72.7716	74.6378	74.8014	74.8528	71.6874	69.4578
70	4.63809	5.29608	5.69175	6.05949	6.60243	6.66686	6.55391	6.7868	6.97699	8.87008	10.367	12.0081	14.1685	16.5233	17.1426	17.6846	18.2665	20.0754	20.5291	21.4799	22.5939	23.9201	24.465	26.2075	28.013	30.0719	32.0504	34.5165	37.3488	40.1487	42.4947	45.0646	47.6257	51.808	54.047	56.0139	58.0141	62.3951	64.9713	67.3459	69.0904	70.7435	72.3604	73.9144	74.7786	74.9455	74.0114	72.2724	69.0537
71	4.31425	4.84219	5.49345	5.72604	6.36516	6.70448	6.64194	6.98631	7.06528	7.70071	8.17818	10.448	11.6727	15.8708	17.2838	17.7099	18.2719	19.0815	20.8763	21.4466	22.0644	23.4977	24.6872	26.0763	27.3172	29.7601	31.075	33.8099	35.9393	38.3822	40.6813	42.5056	46.085	50.8547	54.837	56.9625	58.3824	60.8606	62.8954	65.0203	67.4411	69.9582	71.2979	73.2828	75.5	75.7502	75.3975	74.1714	69.965
72	4.28281	4.51228	4.95396	5.3186	6.07099	6.36573	6.64422	6.86371	6.98081	7.07476	7.65851	8.24021	10.6974	12.065	16.6524	18.1905	18.1134	18.5695	19.4141	20.1343	21.354	22.5226	24.0654	25.9047	26.9752	28.9497	30.0788	32.1217	34.5278	37.6465	40.0858	41.8616	44.565	47.97	51.8302	53.8403	55.5664	58.7638	62.1035	63.3377	65.2335	67.3343	70.0884	71.4791	74.0899	74.2555	72.8863	75.2449	73.5654
73	4.4412	4.7533	4.81987	5.16528	5.69633	6.41739	6.90733	6.74211	6.93805	7.19201	7.39767	8.22317	11.0119	13.5725	16.3104	17.239	17.749	18.1022	18.4238	19.5163	20.9418	22.0988	22.9722	24.6099	26.3168	28.9147	30.888	31.4532	33.9488	35.9107	38.9672	40.7764	44.6648	47.0255	50.0258	52.3086	54.6591	55.7967	59.8051	60.527	63.6193	65.6083	66.5119	70.2567	73.389	74.1452	73.7845	75.3012	74.7505
74	4.66929	4.86865	4.9661	5.60902	5.93397	6.43683	6.70854	7.19937	7.40022	7.54461	7.8957	8.76526	9.42164	11.5806	14.0261	16.3332	17.7391	18.3489	19.2439	19.2414	20.6112	21.5919	23.0648	24.9803	26.5585	27.7147	28.9456	30.4278	32.4765	34.6958	38.8622	40.2895	43.7357	45.7876	47.924	49.2217	53.2754	54.3138	57.141	59.4846	61.6624	64.2991	66.1152	69.3674	71.115	72.9459	73.0752	73.2936	73.2788
75	4.76777	4.81987	4.91818	5.2266	5.69936	6.0641	6.47937	7.02118	7.23179	7.40022	7.93786	8.26756	9.72175	10.4932	12.1502	14.6357	16.6613	17.871	18.8424	19.5056	20.6418	21.8068	22.8735	25.2517	27.6075	27.0627	28.0091	29.6266	31.7338	34.2334	37.086	39.9856	41.6007	43.9813	45.8155	48.5919	51.2406	55.0417	55.6782	59.4807	60.2834	62.8934	65.1073	66.9452	70.0082	71.3982	71.8713	72.7886	72.6433
76	4.27462	4.65168	4.7579	5.06507	5.34663	5.65664	6.00937	6.46927	6.94342	7.19065	7.50449	7.83144	7.98938	9.24468	9.93863	12.8657	15.7825	16.5359	17.808	18.5559	20.5087	21.7105	23.0867	24.0214	25.5996	26.2918	27.8144	29.6476	32.1969	33.7963	37.3369	39.5926	40.9972	41.5677	44.608	46.4801	48.0803	51.2927	53.7953	56.9401	59.0828	60.8627	62.8822	64.0041	67.3583	69.2413	70.4177	71.0691	71.5003
77	3.57675	4.1057	4.27743	4.56884	4.84219	5.43285	6.13873	6.54093	6.55575	6.87054	7.50645	7.40602	7.41793	7.82658	9.07564	10.0679	14.8963	16.4357	17.7303	18.2231	19.4525	21.3895	22.3933	23.5831	24.0406	25.5136	27.2902	29.3042	30.0918	32.6129	35.198	37.7502	40.1812	40.6696	41.2005	43.8938	46.5729	48.4942	51.1281	53.5203	56.6335	57.3206	60.4255	63.2902	64.9203	66.7642	68.7079	67.8454	71.0592
78	3.70073	3.6846	3.69995	4.24846	4.64992	5.01751	5.67331	5.81752	6.15189	6.75788	7.26675	7.10108	7.34167	7.74065	7.80968	9.48874	14.3605	15.5536	17.3604	18.0875	19.0854	20.4907	21.5493	22.674	23.4754	25.0877	25.7217	28.374	28.5506	29.8767	32.7503	34.1789	37.6833	38.6322	39.438	42.066	44.4869	45.6912	48.6459	50.9681	55.3318	55.9527	57.6921	61.7755	62.8541	64.5377	66.427	67.1697	69.2907
79	3.62668	3.62783	3.63264	3.72739	4.41827	4.84182	5.41502	5.76076	6.06654	6.60462	6.79996	7.03917	7.37012	7.56451	7.80237	8.17064	11.2686	14.773	16.1662	17.3661	19.4376	20.1457	21.8622	23.0285	23.7939	24.0066	25.109	26.0572	28.322	29.9656	32.3463	33.9793	34.9851	36.9607	38.2091	39.2425	42.6319	44.4075	46.2716	49.272	50.3816	53.1196	56.468	58.1098	59.1222	61.3471	64.1103	65.0867	67.4233
80	3.36332	3.22278	3.62272	3.62783	4.23609	4.42382	4.92572	5.32965	6.04281	6.22583	6.43076	6.79792	7.0121	7.56411	7.34627	7.88872	9.35343	11.8882	13.9148	15.6576	17.7793	18.5397	20.4154	22.354	23.4615	23.6277	24.3678	25.291	27.6726	28.5131	30.6796	32.6761	32.8471	34.8015	35.6961	38.6905	40.4878	42.871	44.5188	45.994	48.8639	49.8065	53.228	55.3385	55.9697	60.3403	61.9012	63.787	63.9604
81	3.11003	3.21093	3.51828	3.79433	4.13429	4.34432	5.03804	5.47813	5.86272	6.05042	6.26848	6.67182	6.87361	6.97872	7.37447	7.66805	8.57639	10.6479	13.1853	15.7883	16.8697	18.8934	20.271	20.9091	21.8558	22.6816	23.5392	24.1921	25.9851	27.7493	29.5347	31.1093	32.4287	32.5689	34.5609	35.4772	38.399	40.3453	43.7242	44.3424	46.0468	46.3097	49.7269	52.7018	54.6794	56.0685	58.3073	61.0001	61.7506
82	2.77835	2.82792	3.02106	3.42877	3.98005	4.26151	4.21795	4.52675	5.32393	5.41359	5.57459	6.11553	6.40247	7.07067	7.1681	7.33121	8.05111	10.2589	10.9502	13.8364	15.9123	17.552	19.1894	20.0193	20.6881	21.1756	22.7074	24.1369	25.268	27.0337	27.3638	28.7792	30.3635	31.6849	33.2697	34.0936	35.9416	37.4123	38.8046	41.8371	44.483	43.8863	47.3806	49.8619	50.7107	52.6785	54.5754	56.396	57.92
83	2.73107	2.83508	3.0735	3.22852	4.0216	3.9783	4.25549	4.59534	4.88961	5.26191	5.28137	5.92938	6.05249	6.5795	7.11221	7.67767	7.94709	8.49553	9.54374	10.6082	14.088	15.555	17.4278	18.573	19.8265	19.9518	21.4423	22.5447	24.416	25.4243	25.7744	28.2028	30.0133	31.2492	32.3465	32.126	33.2836	35.177	36.8128	39.6375	42.2109	43.5513	45.1808	46.6505	47.0575	49.7078	50.6824	52.9566	52.3362
84	2.56086	2.95931	2.93917	3.0735	3.48539	4.0216	4.27689	4.42329	4.58699	5.04854	5.04625	5.40691	5.87066	6.27042	6.97206	7.47384	7.85734	7.7358	8.71564	9.17109	11.6485	12.6523	15.986	18.8498	19.6074	20.1138	20.3004	22.1561	23.5889	24.2959	24.2977	25.8172	28.433	28.8777	30.4199	31.5434	33.0083	33.4999	36.3853	37.0794	39.7211	42.3342	43.3969	44.535	44.3205	47.1083	48.9548	50.0676	49.7605
85	2.62167	2.60233	2.74393	2.86662	3.18374	3.78198	4.05156	4.27976	4.53593	4.73761	5.0744	5.10377	5.67348	5.85348	6.62971	7.0943	7.60859	7.93051	8.23858	8.69262	11.3138	13.3938	15.9285	17.4659	17.4392	18.742	19.92	20.6772	21.6622	21.3432	22.0488	25.0483	26.6965	27.7542	28.8657	29.6911	30.8897	32.0693	34.3842	35.1006	37.7076	39.1089	40.343	42.1925	42.2957	44.5467	47.2691	47.7768	49.1851
86	2.47038	2.33859	2.33302	2.83184	3.5128	3.85709	4.14166	4.15973	4.26817	4.68105	4.93368	4.98061	5.12105	5.68992	6.42186	6.37978	6.73045	7.63201	7.94943	7.88122	8.40475	9.50628	11.3467	11.1639	13.1481	15.9524	18.1167	20.2847	20.3184	21.0923	22.4898	24.2597	24.0242	26.2957	27.8	28.705	29.876	31.4994	32.6592	34.7841	35.4342	37.184	38.7254	39.6889	39.9868	42.0581	44.9346	46.41	45.5466
87	2.19271	2.10073	1.88256	2.44644	2.9003	3.80181	3.85738	3.90713	3.89992	4.26676	4.63287	4.65305	4.98284	5.43723	5.86189	6.10368	6.43687	7.21213	7.54275	8.01324	8.04502	8.39988	9.16452	10.0677	11.9586	13.7753	14.9698	18.6424	19.4311	19.3271	21.7315	22.6794	23.2616	23.769	26.3182	27.3406	28.5311	29.3022	30.116	32.0734	33.0931	34.3712	36.5678	37.853	37.2621	39.0055	41.2956	43.1748	44.0315
88	2.23158	2.62167	2.49787	2.32664	2.55902	2.94577	3.70581	3.38076	4.06302	4.19906	4.674	4.64052	4.97752	5.33469	5.70992	5.77601	6.32088	6.4164	7.42641	8.19379	8.15836	8.29821	9.00177	9.22203	10.2666	11.3217	13.9687	15.4627	16.4336	18.9637	20.6821	22.1679	22.4539	23.3261	24.8529	26.9853	27.003	28.0703	28.9428	31.2513	32.6701	33.4301	34.4071	35.1953	35.7534	37.0138	38.4529	40.0494	42.5986
89	1.29774	2.07551	2.25059	1.77598	2.13453	2.45771	2.9568	3.51549	3.84474	4.23047	4.20647	4.55458	4.32574	4.71168	5.05821	5.45639	6.26968	6.5347	6.9106	7.63978	8.21606	8.46513	8.58366	8.90382	9.3443	9.75657	10.5218	12.9408	14.916	15.3462	18.7832	20.9239	21.4026	22.3048	23.5817	24.8338	25.6509	26.4961	27.3863	28.9619	30.7679	32.0579	32.5891	32.6266	33.8024	35.335	36.894	36.5905	38.198
90	0.329102	0.972568	1.53799	1.85883	2.20356	2.52162	2.55902	3.18179	3.59901	3.85738	4.10218	4.20318	4.6971	4.7969	4.96536	5.67486	5.91761	6.40651	6.70251	6.72259	7.58924	7.64554	8.34424	8.46033	8.92906	9.56496	9.82021	10.9233	11.91	12.5115	14.9909	18.5311	18.2087	20.0714	22.661	25.3531	23.948	24.626	25.3988	27.3812	29.2144	30.1751	31.6047	30.6141	30.996	33.0243	34.053	35.1836	36.1068
91	0.379603	0.649395	1.45285	2.03747	2.38581	2.56022	3.14544	3.41039	3.79344	3.86977	3.97969	4.76417	4.86454	5.0747	5.32492	5.54585	5.73056	6.27635	6.71177	6.4799	6.77118	7.25404	7.66636	8.46738	8.89291	8.89863	9.62886	10.1131	11.08	12.2625	12.5629	14.2565	15.7464	19.4715	21.5268	23.3578	24.5148	24.4655	24.1587	25.8464	27.7476	28.4727	29.1115	28.1955	29.9074	30.646	33.3848	34.2179	35.5488
92	0	0	0.10011	0.723766	1.78049	2.47776	2.78484	3.44116	3.99181	4.03032	4.15836	3.92539	4.55131	4.62097	4.99776	5.53046	5.56157	6.07355	6.55057	7.06275	7.13639	7.75673	7.96531	7.84586	8.65786	9.12692	9.5033	9.9379	10.6197	11.4679	12.7852	13.0591	15.5766	17.4791	19.2964	20.9449	21.8227	23.4462	22.8396	23.875	24.8037	25.5632	28.2367	28.6681	30.3819	29.8604	31.6504	33.0943	34.2029
93	0	0	0.0412197	0.368804	1.97966	2.33126	2.55962	3.33804	3.72299	3.71868	3.46445	3.65595	3.87287	4.62099	4.82595	4.93791	4.99831	5.62417	6.28985	7.11542	7.58231	7.92313	8.00205	8.2759	8.79769	9.25637	9.26231	9.79943	10.8486	11.0678	11.1501	11.9151	14.8617	14.6707	16.3169	19.3658	18.9881	20.7698	21.9558	22.3404	23.5855	23.9333	27.9452	27.1924	27.9748	28.0974	29.0964	31.4604	32.2861
94	0	0	0	0.37547	1.66791	2.29566	2.45516	2.90258	3.16613	2.65478	2.87555	3.30369	3.80495	4.30488	4.71121	4.71415	4.92102	5.31339	6.0582	6.6523	7.18049	7.45109	7.76592	7.96818	7.78147	8.75103	9.53603	9.73954	10.221	9.99687	10.2554	10.7399	11.5984	12.8448	15.4501	18.395	17.8995	19.8793	20.3522	20.3371	22.2643	22.7744	25.334	26.8318	26.3784	27.0671	27.4995	29.3806	29.6334
95	1.08264	0.505	0.516373	1.64153	2.24778	2.43578	2.29059	2.86662	2.59976	3.28586	3.12212	3.38515	3.63871	3.93091	4.05565	4.60185	4.65827	5.38575	5.89523	6.72542	6.9265	7.00019	8.00592	8.23041	8.0233	8.51188	9.47114	9.40098	9.56284	9.89063	10.217	10.4043	11.0866	12.2923	14.8538	17.3873	20.0259	17.2757	18.2395	19.8572	22.0314	24.613	24.4218	24.3141	24.2811	25.6514	25.2224	28.2138	28.3238
96	0.547326	0	0.0166722	1.26413	1.20897	1.6672	1.4437	1.86114	2.72302	2.72651	2.929	3.28511	3.48042	3.64187	3.89971	4.23734	4.61321	5.32384	6.00434	6.08723	7.01396	7.24349	7.31267	7.70666	7.46618	7.66994	8.09094	8.88483	8.57789	9.67242	9.90017	9.90635	9.77025	10.8766	13.7137	15.1826	17.0981	17.3798	16.3959	18.1199	21.5271	22.9539	23.4209	23.918	22.9285	23.6173	23.5681	24.8238	25.3699
97	1.18946	0.551562	0.656133	0.147048	0.00710025	0.199682	0.0691192	0.733678	2.21758	2.80346	2.80234	3.25435	3.48042	3.6376	3.66503	3.94531	4.31881	5.10939	6.01869	6.6828	7.14719	7.15492	7.14189	7.20148	7.24052	7.50161	7.97667	8.19477	7.61097	8.17173	9.10451	9.48791	8.65045	9.1649	10.3452	11.5786	13.4385	14.638	15.6233	15.468	20.5375	23.4648	23.4378	23.7699	22.1455	20.652	22.7446	23.159	23.0683
98	1.50176	1.54866	1.21592	0.426708	1.06964	1.52406	0.580352	2.07877	2.35605	2.79509	3.28665	3.57806	3.57326	3.41433	3.81289	4.00941	4.77466	5.57905	6.19711	6.50208	6.92611	6.85529	6.91486	7.44256	7.52425	7.58924	7.939	8.08198	7.58924	8.03764	8.56713	8.65045	8.90008	8.55203	9.20496	9.63417	10.5997	12.1942	12.4803	13.0725	16.3881	17.8053	19.0773	21.8003	19.9487	21.2524	20.6199	20.3482	21.0509
99	1.98131	2.05043	1.82133	1.25961	0.762412	1.09584	0.930387	1.44708	2.7162	2.85671	3.44649	3.22404	3.91632	3.73156	3.79713	4.39993	4.65292	5.53543	5.78715	6.19504	6.55093	6.28037	6.46919	6.8894	7.31862	7.51718	7.63286	7.85089	7.71881	8.26601	8.19407	8.42643	8.03966	8.06268	9.04262	9.32802	9.75957	10.5458	11.2932	11.3664	13.2541	16.2013	17.0817	17.3989	16.2254	20.7577	22.1474	19.5719	18.4792
100	1.99124	2.31223	2.17598	1.84757	2.28119	2.07696	2.36405	2.48173	2.41738	2.92858	3.50832	3.79577	3.38535	3.7834	3.51991	3.41237	4.28015	4.674	5.63824	5.86309	5.98012	5.88929	5.75329	5.90406	7.07015	7.22421	7.45003	7.37199	7.59243	7.71156	7.86169	7.58924	7.62454	7.77471	8.83816	9.83189	9.21838	10.0111	10.0122	10.4927	12.0295	14.4999	13.8382	13.6746	16.3614	15.2216	16.8682	14.9266	13.4197
101	2.24894	2.24894	1.85622	2.04932	2.51444	2.35	2.91462	2.16967	2.28681	2.50692	3.13357	3.27223	2.63538	2.89237	2.76725	3.21275	3.46995	4.01011	4.78232	4.72286	5.07256	4.90932	4.81884	5.44505	5.60895	5.78086	6.53871	6.54767	7.2315	7.48195	7.13805	7.41836	7.58924	7.96866	7.98641	8.29429	7.9834	9.01975	9.32101	9.50885	10.2452	11.197	11.4643	11.1947	12.8999	12.7016	11.3798	12.0722	11.9579
102	3.13217	2.50405	2.82667	2.28119	2.40904	3.05085	3.40762	3.81909	3.21797	2.8056	2.92403	3.59669	3.18163	3.30746	2.82586	2.86769	3.10246	3.62461	3.68225	4.59195	4.44682	5.2212	5.3676	5.46752	5.29603	5.71127	5.82363	5.74266	6.43163	7.08337	7.06199	7.0116	7.68355	7.96574	8.2864	8.19333	7.90602	8.10418	9.22924	9.36326	9.65462	10.2221	10.9898	10.6826	10.8678	10.3444	10.4277	10.9811	12.2796
103	3.09362	3.03431	3.06654	2.90573	3.15812	2.80001	2.68182	3.08166	3.73451	2.72559	2.92182	3.41329	3.11276	2.27524	2.68519	2.96	3.36161	3.83575	3.62307	4.42387	4.63398	5.17386	5.34314	5.8249	5.29003	5.08097	5.25027	5.7466	5.9955	6.41875	6.33114	6.81814	7.14625	7.93579	7.57289	7.49463	7.62906	8.22355	8.89134	8.54189	8.77507	9.83762	10.3524	10.4688	9.55145	8.96952	9.22584	10.4989	10.8879
104	3.11963	3.03083	2.65438	2.98475	2.66817	2.49126	2.41913	3.79643	3.38666	3.33922	2.66207	2.53777	2.56217	1.97316	2.06243	2.78086	3.12181	3.78223	3.54092	3.73335	4.54475	5.04655	4.78123	4.70497	5.4309	5.4564	4.8568	5.17072	5.40077	5.85728	6.444	7.37093	7	7.18074	7.35406	7.36614	7.3631	7.51546	8.51956	8.97908	8.29813	8.54201	9.2752	9.93469	9.33204	9.03363	8.50837	9.91591	10.9047
105	2.97948	3.18337	3.16838	2.8891	3.54289	2.38952	2.27299	2.42361	3.14812	2.58352	3.24347	2.83119	2.26662	2.57352	2.12084	2.54929	2.84003	3.73335	3.6853	4.28914	4.43634	4.96722	5.01683	4.34508	4.87307	4.21734	4.73765	5.15374	4.93485	5.6545	6.01002	7.0452	7.56631	6.85266	6.49711	7.23273	6.02783	7.24983	7.49942	8.78331	8.14599	7.77754	8.41423	8.96993	8.42526	8.48338	8.57676	9.63839	10.6635
106	3.12404	2.9233	2.50321	2.24036	2.30388	1.97616	0.825599	2.05066	2.84852	3.46395	2.85778	2.83124	2.56199	3.40275	2.81091	2.66562	4.03888	4.10346	4.32523	4.32523	3.93035	4.32592	4.2182	4.3116	4.32523	3.65959	3.68284	3.88212	4.40864	5.41826	5.76317	5.85429	6.49405	6.04852	6.19276	6.39911	7.07476	7.10792	7.56171	7.75959	7.69913	7.10947	7.32974	7.90527	8.47895	8.20044	9.58809	9.97999	10.5871
107	3.41604	3.26154	2.82908	2.27179	2.2589	1.65117	1.34081	1.69655	2.40289	3.2677	3.41783	2.60578	3.3731	3.31298	3.39896	3.49011	4.64169	4.5236	4.47134	4.60877	4.22038	3.6495	4.32189	3.97822	3.96894	3.92877	4.09602	4.01292	4.02835	5.60247	5.10227	5.55066	5.73282	5.84455	6.32054	5.8991	6.25699	6.40966	6.60639	7.1165	7.07476	6.97268	6.62007	6.91747	8.32785	8.17087	8.60024	9.49409	10.2526
108	3.72875	3.67112	3.31034	2.84852	2.23869	2.0041	2.44744	2.79041	2.82196	2.82196	2.85803	3.14774	2.74392	2.4102	2.78171	4.17962	4.81583	4.29166	4.09138	3.74909	4.67547	4.7241	4.45106	3.6495	3.56569	3.71458	3.77502	3.84061	4.28641	4.96821	5.43819	4.62464	5.01818	5.92043	6.13346	6.01671	5.60423	5.85429	6.09856	6.49697	6.98476	6.66656	6.74304	6.98366	7.01384	7.76459	8.0266	8.38891	9.35311
109	4.40684	3.61068	3.59876	3.59282	3.49429	2.95199	3.15945	2.82196	2.71555	2.90076	2.62716	2.40989	1.97232	2.79863	2.88306	3.6362	4.64125	3.70281	3.80826	4.51916	4.68169	4.45733	4.06036	4.13611	3.47912	3.56569	3.81542	3.81542	3.54068	3.85738	3.87998	3.68893	3.72615	5.55066	5.68249	5.07677	5.76805	5.67454	5.74023	6.62106	6.12914	6.3316	6.28641	6.27812	6.9023	7.64425	6.91136	7.20104	8.52209
110	3.98444	3.92209	4.12947	3.82825	4.05971	3.32801	3.26257	2.43166	1.96942	1.84162	1.90741	1.87997	3.15057	3.11025	2.56378	3.18912	3.31965	3.1041	4.49078	3.40329	3.93017	4.27485	4.24433	4.9143	3.20011	3.19715	3.31268	4.05116	4.60142	3.77345	3.28716	3.68043	3.80464	3.76821	3.72641	4.19898	5.40117	5.20236	5.43345	6.24284	5.9841	5.78874	5.10982	5.83468	6.0699	6.65932	7.20078	7.28536	7.08328
111	4.2278	4.1588	4.03295	3.7015	2.96605	3.28457	3.81302	3.09025	2.34115	2.6801	2.2104	2.79086	2.93372	3.18494	2.89391	2.39713	2.82404	2.52847	2.52847	2.61897	3.05807	4.02082	4.51358	5.36104	4.79536	4.32525	3.74091	3.8498	4.39704	3.87838	3.76461	3.62366	2.62131	3.42074	3.77155	4.8587	4.49993	4.4299	5.11675	5.7526	5.87765	4.71342	4.96016	5.39381	4.98706	4.93412	6.07561	6.47383	5.88344
112	4.07218	3.86392	3.83794	3.32858	3.16433	3.25327	3.70243	3.32667	3.94971	3.83644	2.26877	3.20836	3.53976	2.89927	2.89388	3.5042	3.61953	3.78536	3.2621	2.61466	3.17358	4.38289	5.00635	4.58671	4.98593	4.69934	4.19597	4.00676	3.55528	3.57062	4.56422	3.5465	3.2199	2.93521	3.12083	4.09098	4.24054	4.16709	5.61768	5.76896	5.22463	4.79876	4.93487	4.24516	4.66436	5.01683	4.56197	6.02447	5.61144
113	3.66421	3.16738	3.23468	3.01419	3.39505	3.50342	3.34947	3.75223	4.25012	3.50102	3.7818	3.58462	3.65266	3.439	2.9361	3.77155	3.9462	3.88929	4.32523	4.14689	3.90645	4.2144	3.70656	4.04412	4.29809	4.06689	3.74532	3.55127	3.69778	3.46599	4.04012	3.59783	3.55363	3.57774	3.15192	4.06301	4.48216	4.39345	4.98074	5.66783	5.10713	4.50651	4.18905	4.58571	4.46777	5.10976	4.69006	4.7113	5.38125
114	3.25506	3.30675	3.08645	2.98938	3.59166	3.19539	3.57345	3.10395	4.01642	4.01642	4.09289	4.42194	3.83271	4.41184	4.24243	3.82836	4.54775	4.04708	3.39257	3.06602	3.52961	2.64289	3.30665	4.06689	4.82074	4.56038	4.32126	4.43595	4.44834	3.33072	2.62527	4.20731	3.47146	2.6395	3.47857	4.89237	3.82419	4.63626	4.96796	5.08485	4.2868	3.88764	4.00374	4.27711	4.65351	5.01572	5.02074	5.0277	5.17848
115	3.66421	3.89695	3.45486	3.13291	3.86633	3.83563	3.86115	3.67969	3.88984	4.41629	4.5994	4.01037	4.42322	4.38413	4.22793	4.54184	3.85649	4.78971	4.31344	4.28404	4.04052	4.19368	4.157	5.10068	5.27035	4.67568	4.52789	5.43375	5.75059	4.94308	4.90488	3.54088	4.96235	3.84979	2.95443	3.80476	3.80695	4.67467	4.7106	4.56579	3.58258	3.37942	3.35454	3.73263	4.55384	5.1114	4.82356	5.21655	3.54554
116	3.72947	3.5079	3.8931	4.27291	4.33577	4.96051	4.84935	4.55081	4.62016	4.4978	4.51282	4.32242	4.42437	4.30595	4.88995	4.61457	4.22051	4.49538	4.20974	4.9129	4.18183	3.28166	4.00943	5.27035	4.9491	4.6465	5.31326	5.95171	5.97385	6.94096	5.66934	5.61473	4.86932	4.98776	3.82294	3.37579	3.49576	4.53156	3.80578	3.80578	3.29179	2.64226	2.61065	3.00038	3.65865	4.08307	5.05677	4.25304	2.6157
117	3.61378	4.17525	4.3674	4.47908	4.57912	5.124	5.01072	4.71597	4.92675	5.10564	5.01371	4.35369	5.28418	4.98401	5.03136	4.88116	4.76301	4.74768	4.80012	5.98406	4.28477	4.70774	4.97714	4.97714	4.97765	5.5641	5.94575	5.78027	7.00728	7.28577	7.40496	6.55459	5.48103	6.12195	3.79427	3.20945	3.82457	3.84689	4.06854	4.48895	4.56952	3.97917	2.71789	3.12362	4.10977	4.4385	3.71867	2.76562	1.91225
118	4.58496	4.91414	4.56536	4.95841	4.84047	5.17241	4.95619	5.14025	5.18801	4.7104	4.61864	4.68026	5.25826	4.91235	5.87247	6.0911	5.4807	5.45018	5.95387	5.48651	5.81466	5.82105	5.05192	5.01683	5.03554	6.12363	7.06097	6.74501	8.01478	7.73677	7.40775	6.94223	6.09022	5.73005	4.64658	4.01239	4.24455	3.78394	4.95035	5.08387	4.9099	3.59513	3.61723	4.49458	3.78759	3.90315	4.9774	2.76243	2.68106
119	5.28478	4.50284	5.41246	5.373	5.10528	4.9843	5.55066	5.20168	5.48876	5.09611	4.12529	4.87593	5.25365	5.00848	5.34147	5.52877	6.06132	6.47859	6.07431	5.89028	6.04793	5.80422	6.17158	5.82878	6.13491	6.90251	7.87842	8.389	7.27437	6.97514	7.05023	7.24184	5.76803	5.16348	4.89628	4.79344	3.82989	4.95017	5.03493	4.93643	5.01595	4.14548	3.83227	4.29303	3.87817	3.65339	3.12229	2.93263	2.41558
[truncated: 71 more columns]
