# Supplementary material for: Unexpected long-term variations of Saturn’s ring current revealed by energetic neutral atom imaging
Source: Research Square preprint supplement (doi:10.21203/rs.3.rs-3271171/v1), 2023-09-18
Supplement: Supplementary file 8 [file 52949a78d308db95132fcf58.xlsx]

## Sheet: ff3
	0	1	2	3	4	5	6	7	8	9	10	11	12	13	14	15	16	17	18	19	20	21	22	23	24	25	26	27	28	29
0	0.263953	0.276161	0.284725	0.310625	0.346345	0.377589	0.405804	0.447982	0.440184	0.448587	0.461077	0.433095	0.431533	0.435106	0.400145	0.382936	0.315384	0.286365	0.307354	0.310065	0.243994	0.187451	0.142891	0.148948	0.15547	0.150988	0.139339	0.156712	0.157518	0.165304
1	0.242198	0.268726	0.283762	0.303542	0.32407	0.354673	0.386353	0.400402	0.42591	0.445322	0.487142	0.47593	0.454447	0.438251	0.40911	0.403829	0.360623	0.283702	0.277895	0.257586	0.25698	0.21542	0.185092	0.183251	0.175247	0.162165	0.149955	0.150343	0.153637	0.154651
2	0.240516	0.262699	0.296032	0.301924	0.341291	0.372427	0.382857	0.387572	0.42066	0.414039	0.43874	0.431701	0.389866	0.390927	0.384889	0.389194	0.380646	0.348761	0.307928	0.265057	0.274064	0.228563	0.200102	0.224591	0.171484	0.184801	0.182028	0.147907	0.116819	0.136986
3	0.26532	0.287525	0.302311	0.327116	0.342233	0.378641	0.394757	0.416477	0.433292	0.445677	0.430554	0.430554	0.419782	0.414617	0.394294	0.383058	0.366239	0.340141	0.33252	0.297648	0.291022	0.260412	0.276459	0.198421	0.208493	0.170858	0.153281	0.143759	0.139222	0.159819
4	0.260308	0.287239	0.287239	0.322295	0.327414	0.357122	0.38212	0.40582	0.441534	0.434716	0.436335	0.441551	0.409078	0.393166	0.393166	0.345292	0.305468	0.316467	0.289236	0.267236	0.29023	0.293848	0.220808	0.214686	0.172211	0.17629	0.1565	0.1559	0.14307	0.137657
5	0.266815	0.281357	0.340485	0.346583	0.370005	0.370005	0.413071	0.41813	0.430665	0.433326	0.439328	0.435766	0.40294	0.40294	0.385359	0.365946	0.336797	0.333312	0.335389	0.299488	0.29372	0.286543	0.306103	0.297508	0.309853	0.275742	0.194816	0.183409	0.174838	0.167494
6	0.266815	0.278363	0.311532	0.34805	0.368303	0.374992	0.409643	0.411231	0.433388	0.4501	0.445371	0.449223	0.441616	0.419016	0.403471	0.369767	0.332764	0.332764	0.335955	0.286634	0.255973	0.243397	0.243397	0.24689	0.223916	0.206516	0.222508	0.222508	0.203672	0.19341
7	0.272695	0.305422	0.329033	0.329052	0.361339	0.396942	0.396942	0.431534	0.466597	0.484115	0.4815	0.480728	0.476823	0.456669	0.443071	0.397043	0.373816	0.324689	0.324689	0.264911	0.238537	0.24276	0.236885	0.278099	0.281938	0.249284	0.240101	0.241449	0.213652	0.220389
8	0.296671	0.325511	0.329033	0.354023	0.377059	0.438359	0.438359	0.481514	0.50677	0.493324	0.478238	0.495025	0.487052	0.484484	0.466299	0.436979	0.393179	0.341807	0.341807	0.29374	0.211656	0.18843	0.190922	0.190489	0.183566	0.21001	0.213709	0.201896	0.191641	0.196287
9	0.304511	0.318021	0.355441	0.377594	0.422212	0.455699	0.460325	0.488207	0.500938	0.514518	0.524013	0.508968	0.50828	0.47505	0.452081	0.41981	0.401472	0.401472	0.359036	0.312301	0.291222	0.22729	0.22729	0.190816	0.192238	0.180184	0.173425	0.173425	0.181355	0.179602
10	0.304511	0.33653	0.368893	0.425666	0.457229	0.457229	0.480568	0.499095	0.518796	0.527503	0.544014	0.520363	0.51377	0.51377	0.460499	0.43986	0.417642	0.397961	0.341234	0.295652	0.285121	0.228297	0.180271	0.181094	0.156439	0.159191	0.161826	0.153094	0.148316	0.137096
11	0.340155	0.358847	0.358847	0.39612	0.436786	0.453704	0.4831	0.517578	0.529704	0.565674	0.534446	0.547504	0.534116	0.505928	0.505928	0.469743	0.419986	0.374095	0.353134	0.330603	0.269921	0.251775	0.202699	0.17075	0.160066	0.159617	0.155586	0.164946	0.157898	0.166264
12	0.339288	0.373975	0.415239	0.433878	0.461273	0.497289	0.530499	0.550708	0.560712	0.57916	0.554686	0.554686	0.553848	0.533567	0.518589	0.497876	0.439174	0.403132	0.370943	0.344747	0.304352	0.260818	0.248987	0.196108	0.194215	0.177262	0.170842	0.172619	0.172844	0.151281
13	0.342196	0.364716	0.419387	0.449693	0.480662	0.50053	0.517442	0.561074	0.577669	0.60871	0.604024	0.585261	0.554221	0.538622	0.544247	0.513855	0.490337	0.442795	0.397579	0.362277	0.351133	0.339552	0.312196	0.251442	0.246464	0.243213	0.203303	0.190036	0.17869	0.174046
14	0.350464	0.385747	0.431551	0.472274	0.479263	0.520377	0.535522	0.570116	0.596331	0.643228	0.611555	0.585488	0.56529	0.566592	0.539264	0.530455	0.487169	0.476615	0.42618	0.419751	0.355733	0.319139	0.305517	0.274134	0.237988	0.224136	0.208805	0.20242	0.194304	0.190348
15	0.399362	0.445274	0.488499	0.509044	0.53856	0.558469	0.603098	0.621618	0.617973	0.639694	0.633684	0.62509	0.597524	0.566884	0.547459	0.504854	0.473575	0.448578	0.421311	0.390499	0.363981	0.348953	0.342417	0.323164	0.269649	0.241614	0.219219	0.199	0.184622	0.18471
16	0.393487	0.432281	0.473403	0.511226	0.543981	0.584171	0.611745	0.624738	0.649289	0.640001	0.650945	0.63665	0.622503	0.626509	0.616815	0.586878	0.566791	0.524074	0.488354	0.426425	0.391228	0.377805	0.36427	0.356463	0.344024	0.320086	0.2815	0.226873	0.211486	0.223561
17	0.423955	0.456422	0.502222	0.529594	0.573974	0.624299	0.650115	0.654347	0.660539	0.691962	0.713923	0.683273	0.650672	0.636885	0.594703	0.561176	0.53924	0.513362	0.485676	0.464278	0.431465	0.40557	0.378211	0.352467	0.319165	0.301718	0.292038	0.25859	0.228898	0.181844
18	0.443869	0.467779	0.517174	0.583668	0.610147	0.626978	0.665686	0.678814	0.712156	0.715997	0.694193	0.694193	0.689462	0.683636	0.651276	0.642343	0.597681	0.559644	0.512791	0.503053	0.451636	0.429185	0.390522	0.366891	0.348291	0.316405	0.313268	0.303165	0.27806	0.256512
19	0.483636	0.504217	0.504217	0.576699	0.604273	0.67296	0.675442	0.681399	0.703605	0.721549	0.747584	0.698967	0.674559	0.661007	0.661007	0.627599	0.600078	0.571264	0.517985	0.501204	0.462707	0.452422	0.398826	0.376685	0.361792	0.334646	0.315372	0.295807	0.243563	0.203335
20	0.445982	0.503281	0.550998	0.611391	0.649004	0.680018	0.700218	0.727346	0.744245	0.769793	0.76745	0.758912	0.702648	0.728277	0.690614	0.648207	0.643853	0.592276	0.571151	0.52924	0.52924	0.45817	0.426467	0.399276	0.356446	0.335937	0.322839	0.292265	0.292265	0.2799
21	0.494859	0.553613	0.603947	0.647652	0.69048	0.706573	0.753239	0.75463	0.774932	0.792802	0.799612	0.79642	0.789525	0.771171	0.706993	0.677507	0.656765	0.656765	0.596903	0.550422	0.523173	0.512215	0.512215	0.48049	0.43662	0.41167	0.374316	0.374316	0.346856	0.324231
22	0.519818	0.582265	0.604642	0.634887	0.693831	0.75757	0.75757	0.780012	0.803183	0.799025	0.82735	0.795863	0.762537	0.773712	0.785475	0.730245	0.680293	0.657002	0.657002	0.615252	0.546892	0.52692	0.512448	0.446027	0.451334	0.421986	0.409458	0.394492	0.381313	0.380566
23	0.516711	0.600449	0.604642	0.666241	0.729879	0.760742	0.760742	0.824877	0.84116	0.837703	0.830238	0.82091	0.807198	0.802574	0.776912	0.748698	0.706707	0.657383	0.657383	0.617007	0.560325	0.530669	0.507296	0.469524	0.458424	0.450879	0.416982	0.402949	0.390647	0.388753
24	0.547364	0.569566	0.646442	0.676997	0.746903	0.787077	0.787105	0.82029	0.869742	0.846458	0.859598	0.842607	0.864018	0.840896	0.791691	0.774297	0.71731	0.71731	0.683295	0.616302	0.602219	0.570471	0.570471	0.537519	0.539208	0.468337	0.462865	0.462865	0.434197	0.415063
25	0.547364	0.616757	0.669444	0.707585	0.771981	0.771981	0.811104	0.853164	0.864278	0.869469	0.876637	0.863582	0.835957	0.835957	0.806222	0.786993	0.744038	0.688225	0.66789	0.65761	0.62734	0.602287	0.577547	0.544637	0.527495	0.503799	0.475691	0.442107	0.452611	0.438552
26	0.59709	0.624093	0.624093	0.705753	0.756016	0.79742	0.848679	0.87207	0.888703	0.8878	0.855255	0.845974	0.838894	0.825274	0.825274	0.791306	0.746643	0.744916	0.679295	0.662723	0.614714	0.605587	0.59454	0.596845	0.561003	0.544921	0.522074	0.473658	0.454449	0.424971
27	0.569414	0.610454	0.665907	0.741657	0.81498	0.838659	0.861809	0.865006	0.891645	0.924506	0.866545	0.866545	0.867904	0.848612	0.8292	0.803377	0.775355	0.732704	0.719912	0.682425	0.641882	0.628597	0.624663	0.586098	0.554123	0.527258	0.491152	0.475521	0.480179	0.470109
28	0.548128	0.590792	0.652909	0.718305	0.764558	0.846298	0.880823	0.9165	0.926713	0.941564	0.917243	0.900334	0.880739	0.85604	0.841461	0.793032	0.765133	0.741865	0.725073	0.671479	0.636177	0.62734	0.606567	0.573873	0.546741	0.52126	0.509664	0.504794	0.493205	0.472924
29	0.53891	0.58464	0.636809	0.715521	0.778544	0.85169	0.894157	0.901421	0.912335	0.937125	0.926205	0.91907	0.872072	0.87028	0.869601	0.826245	0.796512	0.773516	0.753621	0.711262	0.686698	0.665493	0.652737	0.640385	0.604224	0.564425	0.533503	0.497534	0.486274	0.465007
30	0.524335	0.575517	0.660986	0.73042	0.780745	0.847155	0.894094	0.901053	0.91913	0.925515	0.925997	0.951506	0.9332	0.911732	0.901171	0.85907	0.824788	0.806211	0.769183	0.720132	0.68188	0.657824	0.610954	0.577062	0.564098	0.544133	0.529053	0.501908	0.47393	0.465662
31	0.55855	0.61194	0.682569	0.756071	0.794692	0.864699	0.898979	0.931955	0.953581	0.948781	0.921215	0.935625	0.904012	0.911505	0.896823	0.846996	0.808323	0.785139	0.759102	0.694934	0.70016	0.68949	0.666786	0.658041	0.602696	0.566773	0.548687	0.508964	0.493154	0.497006
32	0.580624	0.628002	0.689003	0.757724	0.801955	0.868252	0.893591	0.929005	0.93683	0.939743	0.959239	0.925543	0.901795	0.891599	0.873176	0.851073	0.825497	0.798934	0.756148	0.723787	0.681588	0.664823	0.651293	0.614693	0.601218	0.598197	0.588955	0.553794	0.535065	0.499697
33	0.613367	0.671072	0.744274	0.80566	0.86591	0.91374	0.938336	0.958562	0.972432	0.982539	0.96513	0.96513	0.970664	0.922393	0.879808	0.836936	0.813961	0.783034	0.771725	0.740551	0.715976	0.681442	0.658907	0.655465	0.630105	0.590523	0.561432	0.525686	0.490713	0.462818
34	0.631906	0.719366	0.719366	0.81161	0.852154	0.921006	0.949637	0.960325	0.94941	0.953953	0.968098	0.946724	0.93051	0.90015	0.90015	0.86735	0.852554	0.830134	0.790636	0.737545	0.713322	0.693866	0.656419	0.645412	0.614165	0.62147	0.581063	0.536143	0.50887	0.484033
35	0.576293	0.674451	0.748176	0.829167	0.866527	0.898389	0.922092	0.96825	0.974598	0.982123	0.967803	0.950694	0.931064	0.944624	0.912985	0.87083	0.864888	0.80045	0.782554	0.727855	0.727855	0.696878	0.684493	0.627728	0.600405	0.602193	0.579354	0.529907	0.529907	0.519278
36	0.591405	0.641807	0.747947	0.778857	0.857137	0.92198	0.942484	0.960767	0.991836	1	0.994653	0.970178	0.947317	0.916426	0.889611	0.844414	0.800489	0.800489	0.761366	0.736845	0.70651	0.661804	0.661804	0.607085	0.589832	0.547396	0.51345	0.51345	0.489248	0.47183
37	0.591278	0.689786	0.742982	0.761983	0.863847	0.930781	0.930781	0.976978	0.997907	0.990406	0.978193	0.95599	0.92659	0.883167	0.864087	0.883617	0.837062	0.777274	0.777274	0.731459	0.695127	0.666655	0.648904	0.585363	0.570461	0.527135	0.517719	0.499198	0.44804	0.423355
38	0.565993	0.677567	0.742982	0.774411	0.856282	0.912993	0.912993	0.951551	0.991281	0.978274	0.964786	0.952791	0.944357	0.881665	0.883528	0.865643	0.799057	0.747513	0.747513	0.703332	0.669863	0.62326	0.636299	0.594184	0.569452	0.527877	0.485966	0.475999	0.450479	0.437805
39	0.578603	0.628407	0.731063	0.753781	0.840601	0.910362	0.935028	0.935133	0.975261	0.957295	0.941906	0.954081	0.941705	0.907929	0.884657	0.824853	0.761702	0.761702	0.709306	0.669336	0.631846	0.575479	0.575479	0.514502	0.500039	0.47141	0.471582	0.471582	0.40313	0.401188
40	0.578603	0.622692	0.717218	0.772573	0.875362	0.875362	0.936465	0.940329	0.979983	0.959129	0.939431	0.930447	0.914527	0.914527	0.873043	0.789817	0.772204	0.727934	0.686218	0.640039	0.642305	0.591405	0.532992	0.499289	0.470342	0.447906	0.412957	0.428744	0.393664	0.397852
41	0.596428	0.66082	0.66082	0.737224	0.78726	0.862858	0.896649	0.922313	0.932494	0.95485	0.950387	0.928458	0.927872	0.861582	0.861582	0.827563	0.801832	0.757488	0.678097	0.609562	0.550741	0.541825	0.503978	0.467174	0.45425	0.439569	0.416055	0.394005	0.37532	0.353715
42	0.554439	0.609026	0.657787	0.756804	0.793507	0.861	0.897881	0.914624	0.933966	0.956325	0.913156	0.913156	0.917934	0.91928	0.861942	0.847081	0.780662	0.739377	0.672128	0.643279	0.618212	0.567448	0.505248	0.468705	0.432763	0.449171	0.411724	0.388273	0.361414	0.335482
43	0.536157	0.597947	0.635708	0.694725	0.737023	0.83748	0.868292	0.908292	0.925654	0.922277	0.937537	0.91507	0.916182	0.885836	0.820753	0.791466	0.739724	0.690361	0.661851	0.589755	0.560332	0.515461	0.50187	0.452236	0.414545	0.387013	0.393627	0.383257	0.369041	0.345211
44	0.512275	0.558318	0.615558	0.674573	0.718214	0.785917	0.842119	0.890134	0.903365	0.912865	0.905269	0.901217	0.862138	0.852073	0.822739	0.783875	0.743327	0.710377	0.696378	0.609188	0.582892	0.528276	0.479063	0.450772	0.443747	0.40858	0.383634	0.335001	0.311946	0.306905
45	0.450709	0.510313	0.590514	0.640561	0.685944	0.7579	0.780748	0.816815	0.840497	0.852823	0.865986	0.863532	0.861053	0.825849	0.797512	0.773301	0.721067	0.678374	0.619927	0.5916	0.54224	0.52884	0.486678	0.469496	0.428974	0.373565	0.353338	0.34523	0.286961	0.288204
46	0.441685	0.475535	0.539515	0.593138	0.667139	0.732627	0.766582	0.812097	0.851947	0.849707	0.846374	0.83831	0.826081	0.801584	0.780986	0.740511	0.702698	0.652653	0.602115	0.549284	0.490358	0.419726	0.405195	0.379185	0.331778	0.304572	0.279402	0.259716	0.231561	0.210278
47	0.417859	0.474217	0.532655	0.590244	0.642094	0.723185	0.769639	0.790255	0.819898	0.841659	0.8271	0.826719	0.823638	0.7761	0.720065	0.684967	0.64084	0.589795	0.541308	0.479399	0.454738	0.41818	0.351349	0.318895	0.291262	0.261576	0.226828	0.216657	0.207552	0.184358
48	0.413565	0.472429	0.520208	0.586011	0.626527	0.695597	0.772076	0.796664	0.810091	0.795411	0.776839	0.776839	0.76465	0.70721	0.692514	0.662205	0.598277	0.575685	0.522894	0.495378	0.428428	0.383132	0.338331	0.22551	0.2092	0.218582	0.20629	0.201742	0.19875	0.194399
49	0.429016	0.482549	0.482549	0.566266	0.598288	0.633071	0.708452	0.750051	0.764792	0.753912	0.784226	0.74397	0.701965	0.688413	0.688413	0.632174	0.598693	0.559984	0.495269	0.445305	0.397782	0.328179	0.264022	0.222232	0.206196	0.221172	0.22244	0.189984	0.199464	0.202941
50	0.38002	0.428973	0.478536	0.521195	0.586488	0.586488	0.662611	0.686416	0.748783	0.751571	0.782706	0.750262	0.720252	0.720252	0.677943	0.639898	0.59082	0.544829	0.456291	0.433568	0.416161	0.37109	0.291983	0.273712	0.206323	0.21059	0.226104	0.223046	0.223548	0.228165
51	0.38002	0.400362	0.436973	0.479082	0.545219	0.609902	0.611793	0.659631	0.703153	0.714915	0.731524	0.710078	0.693167	0.652166	0.634183	0.617894	0.553626	0.553626	0.500552	0.45417	0.425534	0.358159	0.358159	0.343706	0.279539	0.280339	0.273678	0.273678	0.414382	0.429466
52	0.354208	0.396633	0.410791	0.466912	0.521782	0.580129	0.580129	0.660863	0.677032	0.711087	0.688321	0.702214	0.668153	0.68733	0.675043	0.654395	0.574252	0.503261	0.503261	0.402851	0.338462	0.365233	0.340375	0.347314	0.322369	0.379292	0.358504	0.383088	0.390021	0.421388
53	0.318245	0.373147	0.410791	0.436353	0.514047	0.551714	0.551714	0.60938	0.633896	0.615388	0.645316	0.660665	0.672707	0.650449	0.642074	0.610007	0.551617	0.488967	0.488967	0.428948	0.412504	0.423824	0.415244	0.409378	0.442342	0.527808	0.492453	0.444922	0.418431	0.456359
54	0.296067	0.342548	0.389888	0.412466	0.47182	0.48626	0.523853	0.535908	0.57803	0.626777	0.622914	0.625811	0.607609	0.601213	0.582607	0.578893	0.542774	0.542774	0.533222	0.476059	0.490241	0.493285	0.493285	0.478856	0.405991	0.438734	0.39149	0.39149	0.428275	0.442276
55	0.276669	0.310889	0.339245	0.394765	0.441924	0.462941	0.484994	0.537897	0.54966	0.562692	0.564327	0.579907	0.562663	0.567932	0.562216	0.540053	0.518386	0.487398	0.481745	0.512555	0.512555	0.496732	0.504848	0.490546	0.462908	0.409428	0.467858	0.438048	0.438048	0.392033
56	0.292428	0.320791	0.320791	0.371432	0.390842	0.470653	0.467957	0.475711	0.523228	0.512212	0.543317	0.554024	0.537861	0.523033	0.523033	0.511043	0.504745	0.507372	0.475702	0.499284	0.489865	0.445493	0.425687	0.439268	0.422194	0.435005	0.398782	0.360724	0.328217	0.300822
57	0.276623	0.31043	0.333075	0.364073	0.408365	0.449628	0.453176	0.471994	0.494876	0.520358	0.530573	0.530573	0.541337	0.530947	0.505755	0.512399	0.495605	0.475066	0.456382	0.437158	0.39311	0.373875	0.370091	0.301836	0.275012	0.253969	0.236364	0.318923	0.32401	0.250946
58	0.25359	0.273588	0.314622	0.321193	0.351224	0.411509	0.440508	0.450824	0.456615	0.482482	0.49955	0.495502	0.495393	0.501746	0.460561	0.438516	0.429688	0.38666	0.347539	0.367535	0.34426	0.37579	0.323186	0.245171	0.248935	0.228379	0.226386	0.236791	0.222512	0.232488
59	0.239922	0.262976	0.299151	0.308361	0.318591	0.352903	0.394962	0.419856	0.446464	0.465616	0.487143	0.500936	0.485221	0.481088	0.474342	0.469816	0.450884	0.401454	0.371083	0.35817	0.307236	0.329806	0.287452	0.241813	0.232753	0.223226	0.212588	0.209276	0.194355	0.242162
