# Supplementary material for: Unexpected long-term variations of Saturn’s ring current revealed by energetic neutral atom imaging
Source: Research Square preprint supplement (doi:10.21203/rs.3.rs-3271171/v1), 2023-09-18
Supplement: Supplementary file 9 [file 53e4597f2e0c88f22ef41995.xlsx]

## Sheet: energy content
		Quantile	0.1	0.2	0.3	0.4	0.5	0.6	0.7	0.8	0.9
		Period1	3.4789e+12	7.97146e+12	1.29851e+13	1.88687e+13	2.5609e+13	3.35444e+13	4.47363e+13	6.41722e+13	9.86722e+13
		Period2	2.50731e+12	6.24567e+12	1.06179e+13	1.5689e+13	2.15873e+13	2.88612e+13	3.90897e+13	5.61895e+13	91381404807600
		Period3	1.85877e+12	5.16909e+12	9.31623e+12	1.39525e+13	1.99151e+13	2.77117e+13	3.80378e+13	5.33403e+13	8.47986e+13
Energy Content (J)		Period4	2.37824e+12	5.54096e+12	9.55707e+12	1.42292e+13	19608159093453	2.58999e+13	3.38686e+13	4.58828e+13	7.07074e+13
		Period5	6.89185e+11	1.68108e+12	3.04634e+12	5.47664e+12	8.6844e+12	1.33928e+13	19872811195102	2.94718e+13	5.11769e+13
		Period6	7.81845e+11	1.64941e+12	3.11961e+12	5.26023e+12	8.30488e+12	12144400621028	1.73662e+13	2.51912e+13	4.14955e+13
		Period7	1.85933e+12	4.00777e+12	7.14498e+12	1.10615e+13	1.57167e+13	2.1219e+13	2.80054e+13	3.79525e+13	6.11171e+13
