# Supplementary material for: Unexpected long-term variations of Saturn’s ring current revealed by energetic neutral atom imaging
Source: Research Square preprint supplement (doi:10.21203/rs.3.rs-3271171/v1), 2023-09-18
Supplement: Supplementary file 10 [file 6036be9de3e3739b131b77c8.xlsx]

## Sheet: ff7
	0	1	2	3	4	5	6	7	8	9	10	11	12	13	14	15	16	17	18	19	20	21	22	23	24	25	26	27	28	29
0	0.407035	0.414012	0.410765	0.413444	0.42141	0.445171	0.427156	0.426731	0.421423	0.414044	0.414004	0.423562	0.423056	0.436087	0.415099	0.402634	0.400912	0.376455	0.379801	0.395738	0.371675	0.356279	0.361726	0.347312	0.349915	0.338829	0.328621	0.305567	0.279577	0.262976
1	0.422233	0.411437	0.410972	0.423923	0.42139	0.428601	0.437294	0.424074	0.446445	0.446307	0.445359	0.447363	0.444786	0.437469	0.424739	0.420613	0.40397	0.410127	0.401805	0.400329	0.394527	0.368052	0.370076	0.37254	0.364052	0.346564	0.339261	0.330524	0.315354	0.291169
2	0.432366	0.434199	0.42882	0.425205	0.430595	0.446913	0.44249	0.434502	0.440036	0.446259	0.464851	0.468548	0.462371	0.442481	0.438641	0.439561	0.433119	0.432998	0.441402	0.423062	0.412024	0.388694	0.381497	0.35293	0.350959	0.346696	0.343093	0.324645	0.309988	0.297828
3	0.432993	0.428404	0.441851	0.45093	0.45925	0.456915	0.449513	0.475271	0.471593	0.483853	0.4725	0.4725	0.470242	0.485442	0.481344	0.466814	0.465571	0.439988	0.431893	0.42963	0.438152	0.439167	0.427066	0.401862	0.382323	0.354392	0.344343	0.337205	0.344405	0.322912
4	0.440966	0.443469	0.443469	0.460438	0.466143	0.466211	0.477879	0.488959	0.499706	0.498946	0.481522	0.492101	0.487608	0.494642	0.494642	0.481268	0.491223	0.478806	0.470707	0.455565	0.44043	0.437589	0.401406	0.39659	0.375915	0.379341	0.374136	0.362249	0.359313	0.350565
5	0.470514	0.463431	0.458038	0.458666	0.470729	0.470729	0.498131	0.498731	0.529306	0.520331	0.52491	0.506384	0.50731	0.50731	0.511042	0.502328	0.497368	0.485465	0.480402	0.4661	0.462389	0.452679	0.457404	0.422926	0.408585	0.391397	0.379311	0.362906	0.380855	0.361219
6	0.470514	0.478536	0.473763	0.48614	0.490135	0.502141	0.499747	0.518148	0.524757	0.529957	0.541077	0.547292	0.540741	0.544435	0.545408	0.525509	0.519142	0.519142	0.527067	0.511513	0.484595	0.465218	0.465218	0.455712	0.435737	0.438175	0.434376	0.434376	0.426337	0.39849
7	0.483464	0.483911	0.497922	0.49912	0.500851	0.509552	0.509552	0.522531	0.54317	0.542051	0.543428	0.543818	0.555422	0.559103	0.558931	0.547653	0.541735	0.522866	0.522866	0.512811	0.514495	0.492144	0.489292	0.477336	0.485408	0.45379	0.450917	0.444286	0.436095	0.439813
8	0.508315	0.505752	0.497922	0.515822	0.527365	0.521916	0.521916	0.545508	0.567647	0.575837	0.57202	0.563033	0.586329	0.5916	0.564751	0.567964	0.549325	0.553178	0.553178	0.555006	0.546355	0.544459	0.516501	0.503929	0.503018	0.49345	0.482162	0.476762	0.452242	0.453183
9	0.546832	0.53278	0.521129	0.539013	0.548954	0.575639	0.56737	0.58391	0.60084	0.60332	0.610591	0.612902	0.607864	0.599416	0.580865	0.585742	0.572466	0.572466	0.54543	0.55343	0.553796	0.552917	0.552917	0.529193	0.528554	0.511988	0.492125	0.492125	0.480342	0.47155
10	0.546832	0.565344	0.562653	0.571779	0.584283	0.584283	0.596388	0.600334	0.617369	0.616376	0.61581	0.623219	0.621247	0.621247	0.60377	0.609924	0.605865	0.598951	0.586092	0.57524	0.563059	0.545755	0.539818	0.542576	0.532462	0.525778	0.514548	0.506428	0.491797	0.468763
11	0.55682	0.569329	0.569329	0.57369	0.587173	0.600907	0.620052	0.640594	0.6262	0.637325	0.628945	0.646645	0.664288	0.645983	0.645983	0.64153	0.64203	0.631593	0.633744	0.618044	0.600417	0.600194	0.590805	0.587818	0.580822	0.550454	0.539854	0.522008	0.514237	0.504904
12	0.560586	0.586525	0.597252	0.602668	0.630818	0.640738	0.681935	0.672608	0.678694	0.695296	0.677715	0.677715	0.684178	0.668252	0.670191	0.675594	0.655838	0.647896	0.655399	0.654962	0.625903	0.603191	0.602342	0.565935	0.57338	0.576273	0.569084	0.558704	0.537181	0.526827
13	0.584796	0.595474	0.606248	0.626426	0.643828	0.653294	0.65735	0.690905	0.715416	0.705606	0.691452	0.696057	0.702392	0.687552	0.685106	0.679543	0.664613	0.659233	0.655116	0.645231	0.62942	0.632346	0.625333	0.613191	0.609021	0.600525	0.593398	0.588994	0.561371	0.557399
14	0.567884	0.603528	0.617548	0.640149	0.653599	0.668275	0.680298	0.695157	0.700822	0.722863	0.712225	0.702879	0.712034	0.698962	0.69808	0.698988	0.694389	0.696335	0.698145	0.668164	0.67529	0.663125	0.658884	0.650109	0.632558	0.626802	0.594976	0.566016	0.551046	0.547419
15	0.60242	0.62917	0.655478	0.668242	0.668458	0.68328	0.703814	0.718259	0.727635	0.724821	0.733255	0.724371	0.726237	0.724411	0.720016	0.717387	0.714546	0.729201	0.728358	0.712647	0.700765	0.692336	0.689328	0.677249	0.641634	0.616239	0.595365	0.594437	0.593514	0.568126
16	0.608378	0.622762	0.641715	0.655056	0.689855	0.726547	0.735344	0.729805	0.725137	0.735848	0.749804	0.763371	0.761832	0.761816	0.763305	0.761596	0.788218	0.778893	0.783362	0.749705	0.744792	0.727982	0.710393	0.686349	0.667964	0.647033	0.638605	0.629306	0.622663	0.602221
17	0.617831	0.628554	0.652514	0.670605	0.709217	0.759764	0.761351	0.78085	0.760657	0.772847	0.789985	0.784083	0.777535	0.783489	0.784432	0.787398	0.768091	0.760282	0.767348	0.753744	0.730102	0.724145	0.711108	0.695793	0.666985	0.652399	0.641783	0.625416	0.595253	0.57652
18	0.636987	0.65034	0.691741	0.727227	0.753933	0.767406	0.798174	0.788796	0.810932	0.801679	0.79971	0.79971	0.801051	0.809921	0.809451	0.792381	0.784637	0.787368	0.764767	0.740862	0.736645	0.705224	0.687052	0.672772	0.658396	0.648985	0.652702	0.644095	0.617179	0.612784
19	0.652617	0.682042	0.682042	0.738431	0.765336	0.788921	0.790602	0.808674	0.794496	0.808689	0.810971	0.805762	0.814632	0.795477	0.795477	0.794914	0.81125	0.803013	0.774076	0.763409	0.724943	0.727898	0.707351	0.687501	0.661162	0.675605	0.673926	0.650564	0.635687	0.626015
20	0.643519	0.680179	0.712615	0.760858	0.772179	0.788322	0.792163	0.818452	0.82537	0.83139	0.833931	0.809798	0.801605	0.833652	0.807494	0.822465	0.813256	0.786596	0.752333	0.744027	0.744027	0.746419	0.730921	0.741128	0.694009	0.683445	0.649666	0.608544	0.608544	0.574728
21	0.675677	0.703721	0.740179	0.766504	0.780121	0.791996	0.816738	0.803207	0.862987	0.864401	0.874374	0.86926	0.850676	0.852454	0.835879	0.829161	0.817349	0.817349	0.787236	0.75353	0.738189	0.726057	0.726057	0.691514	0.691443	0.673256	0.626791	0.626791	0.574606	0.576963
22	0.686076	0.729347	0.749471	0.767106	0.814943	0.848113	0.848113	0.865918	0.879986	0.876922	0.913765	0.884537	0.88828	0.871246	0.851575	0.834787	0.785334	0.794994	0.794994	0.764056	0.731676	0.722292	0.708106	0.69771	0.674859	0.648554	0.61417	0.583443	0.556603	0.540219
23	0.712441	0.739092	0.749471	0.800299	0.840021	0.885076	0.885076	0.91018	0.897839	0.913394	0.900206	0.902812	0.900794	0.892721	0.887822	0.861223	0.853788	0.824019	0.824019	0.77886	0.737831	0.73246	0.702003	0.686639	0.657777	0.613417	0.604147	0.582472	0.543561	0.526709
24	0.722413	0.721931	0.770929	0.805998	0.862601	0.90683	0.914373	0.912814	0.919938	0.929697	0.905943	0.895297	0.916818	0.912652	0.890163	0.864342	0.822649	0.822649	0.798916	0.7651	0.725244	0.683518	0.683518	0.663624	0.632442	0.594159	0.569109	0.569109	0.536331	0.499814
25	0.722413	0.757456	0.80634	0.838365	0.875868	0.875868	0.907983	0.889688	0.889767	0.909164	0.915383	0.913031	0.902344	0.902344	0.900118	0.84042	0.807189	0.815949	0.781584	0.731275	0.738615	0.699741	0.665168	0.654517	0.606555	0.550547	0.498404	0.498934	0.480396	0.448435
26	0.758321	0.781434	0.781434	0.824512	0.868132	0.908463	0.918414	0.935092	0.919056	0.959669	0.938131	0.924341	0.9316	0.907995	0.907995	0.853857	0.868187	0.855154	0.814643	0.780388	0.750625	0.71539	0.658152	0.637162	0.6398	0.59741	0.541528	0.487308	0.462475	0.459095
27	0.752223	0.769391	0.829615	0.865201	0.894022	0.91057	0.924409	0.962645	0.986065	0.968573	0.963165	0.963165	0.958435	0.935734	0.918346	0.896098	0.8498	0.826499	0.785113	0.755902	0.702355	0.68082	0.682023	0.659562	0.615504	0.558623	0.539988	0.501686	0.441423	0.393417
28	0.694804	0.755909	0.8369	0.851321	0.879132	0.918031	0.933294	0.941272	0.947417	0.973701	0.974654	0.971697	0.939752	0.928225	0.900548	0.851309	0.844796	0.817297	0.783405	0.735003	0.699662	0.654724	0.630584	0.594167	0.573631	0.519479	0.469058	0.429789	0.399356	0.383158
29	0.703571	0.751328	0.811095	0.839555	0.869113	0.90389	0.902166	0.955421	0.969888	0.969467	0.975689	0.989846	0.973722	0.948837	0.90452	0.882005	0.829226	0.805862	0.78037	0.769467	0.717338	0.678783	0.623162	0.579796	0.536269	0.466224	0.426675	0.401439	0.387017	0.370184
30	0.692216	0.725528	0.784414	0.817186	0.863492	0.880627	0.932449	0.951524	0.953788	0.983679	0.98825	0.976644	0.982893	0.966265	0.946599	0.892035	0.857679	0.836078	0.783004	0.738924	0.703342	0.64104	0.612557	0.570898	0.504716	0.461638	0.432896	0.414625	0.386465	0.367209
31	0.685367	0.738128	0.783662	0.799077	0.851348	0.916214	0.953441	0.948626	0.970721	0.992393	0.970703	0.974373	0.962875	0.913982	0.876129	0.868203	0.863874	0.82203	0.767224	0.68272	0.646179	0.622977	0.578525	0.550315	0.498598	0.4399	0.396067	0.395426	0.375911	0.357557
32	0.683464	0.720013	0.767083	0.815327	0.850839	0.908657	0.930541	0.9596	0.982942	0.984778	0.985152	0.962066	0.948938	0.909843	0.891388	0.816948	0.789881	0.768669	0.728364	0.675677	0.615664	0.584105	0.562047	0.55007	0.480516	0.444559	0.407171	0.389559	0.356642	0.316884
33	0.701321	0.741768	0.784362	0.846504	0.877084	0.919579	0.98025	0.99702	0.990698	1	0.976289	0.976289	0.96813	0.927585	0.873003	0.833217	0.800407	0.77294	0.723348	0.676508	0.608242	0.57293	0.541226	0.470091	0.441421	0.421731	0.376709	0.348649	0.325055	0.302815
34	0.70483	0.732835	0.732835	0.787219	0.84536	0.887736	0.937485	0.977718	0.992264	0.994065	0.992759	0.972843	0.958664	0.910755	0.910755	0.844371	0.808515	0.746599	0.676526	0.649866	0.5976	0.551204	0.496453	0.482132	0.452018	0.415329	0.385491	0.356926	0.320794	0.300223
35	0.655803	0.721495	0.746163	0.810606	0.845547	0.846044	0.878775	0.89579	0.951056	0.965096	0.98624	0.953049	0.938939	0.896563	0.872323	0.822786	0.758038	0.695423	0.673499	0.609912	0.609912	0.517709	0.495388	0.441278	0.390455	0.365908	0.338902	0.320057	0.320057	0.262008
36	0.654881	0.683472	0.724536	0.749654	0.813099	0.831023	0.861011	0.880691	0.916048	0.92885	0.928314	0.915327	0.915031	0.887122	0.816801	0.784432	0.709447	0.709447	0.638593	0.555745	0.531689	0.445222	0.445222	0.377629	0.376467	0.354716	0.311119	0.311119	0.292418	0.270643
37	0.616518	0.68842	0.688624	0.729473	0.795835	0.82294	0.82294	0.860209	0.899054	0.916355	0.880885	0.875295	0.88104	0.835454	0.776666	0.751231	0.69168	0.612783	0.612783	0.524685	0.473081	0.458143	0.438377	0.38843	0.357143	0.284921	0.273671	0.254435	0.237982	0.251599
38	0.609333	0.66246	0.688624	0.695832	0.782762	0.819244	0.819244	0.848334	0.857795	0.845805	0.868562	0.869775	0.84192	0.774208	0.773543	0.725751	0.659275	0.620026	0.620026	0.528506	0.45449	0.445847	0.430709	0.359841	0.340468	0.272249	0.266014	0.262633	0.208247	0.200035
39	0.574142	0.639782	0.652213	0.676057	0.731343	0.74273	0.787986	0.778446	0.81362	0.842784	0.835083	0.840848	0.808324	0.768723	0.715418	0.677894	0.602651	0.602651	0.542622	0.489098	0.452341	0.401439	0.401439	0.360659	0.32811	0.280947	0.23785	0.23785	0.20791	0.127431
40	0.574142	0.590686	0.6151	0.64126	0.681657	0.681657	0.741335	0.767407	0.79379	0.803975	0.838741	0.787268	0.742296	0.742296	0.692941	0.634576	0.603417	0.554339	0.50282	0.464449	0.457525	0.421225	0.36825	0.344927	0.283491	0.264902	0.241958	0.194232	0.170463	0.14152
41	0.548513	0.556626	0.556626	0.611847	0.624261	0.687853	0.698931	0.724483	0.773147	0.75369	0.757208	0.748814	0.722422	0.705071	0.705071	0.63645	0.603175	0.552196	0.51369	0.456228	0.428028	0.36206	0.351407	0.324412	0.284131	0.259892	0.237873	0.165286	0.129962	0.0973025
42	0.509679	0.548266	0.558138	0.612912	0.620389	0.64971	0.678738	0.732238	0.723785	0.723151	0.71469	0.71469	0.710377	0.675175	0.676655	0.619582	0.586862	0.523226	0.472352	0.444689	0.403905	0.364064	0.300297	0.277808	0.242894	0.175897	0.131851	0.110391	0.0984062	0.0970812
43	0.488163	0.514198	0.538	0.562189	0.589551	0.618957	0.641023	0.662923	0.690184	0.669395	0.667445	0.675266	0.680292	0.667829	0.619742	0.591103	0.574648	0.505612	0.453061	0.410998	0.382939	0.332303	0.287008	0.267356	0.22109	0.140504	0.110592	0.0981723	0.0893441	0.0853188
44	0.474785	0.497604	0.522572	0.53996	0.574177	0.580037	0.61451	0.622041	0.632262	0.651899	0.67796	0.675635	0.680538	0.641012	0.59006	0.542846	0.530488	0.503062	0.448403	0.399869	0.369278	0.326513	0.285158	0.245193	0.20197	0.150788	0.119503	0.0989566	0.0934027	0.0859578
45	0.428279	0.450463	0.478377	0.508882	0.54914	0.563038	0.603737	0.604252	0.613429	0.631387	0.65213	0.635014	0.624829	0.597193	0.581532	0.540299	0.509123	0.493241	0.435213	0.406333	0.352053	0.316362	0.274051	0.230505	0.208274	0.1746	0.129117	0.107031	0.0996841	0.0894323
46	0.41424	0.437871	0.459589	0.498378	0.515474	0.542519	0.575752	0.592438	0.600045	0.61112	0.609849	0.622586	0.590025	0.581907	0.562631	0.532692	0.464027	0.456073	0.424868	0.358084	0.313032	0.281051	0.229783	0.197752	0.149278	0.128316	0.111367	0.0923529	0.0897515	0.0903533
47	0.406166	0.427405	0.446897	0.478088	0.493384	0.488862	0.532835	0.541368	0.570348	0.596664	0.588317	0.582428	0.562394	0.521453	0.497017	0.473741	0.455063	0.419251	0.395034	0.328192	0.295338	0.264212	0.195142	0.146136	0.118344	0.105921	0.0967539	0.0893563	0.0839844	0.0815171
48	0.410908	0.422122	0.446548	0.47514	0.489321	0.506129	0.520749	0.526796	0.536801	0.557808	0.542226	0.542226	0.531173	0.486481	0.473259	0.447778	0.437683	0.407185	0.372817	0.340861	0.302153	0.257405	0.244352	0.194706	0.127593	0.104224	0.0939008	0.0866815	0.081998	0.0748946
49	0.399	0.42381	0.42381	0.452601	0.475114	0.485049	0.478315	0.507904	0.521942	0.526425	0.530398	0.516714	0.501775	0.465081	0.465081	0.427148	0.422033	0.39422	0.332385	0.321776	0.278296	0.23482	0.154043	0.143326	0.120639	0.113765	0.0979682	0.0864473	0.0828633	0.0736744
50	0.394725	0.402763	0.420799	0.459722	0.474716	0.474716	0.483348	0.476644	0.499949	0.496984	0.496779	0.490765	0.474252	0.474252	0.448207	0.416337	0.369016	0.369044	0.322283	0.284954	0.280377	0.250309	0.178804	0.143776	0.120544	0.100553	0.08494	0.0839941	0.0800531	0.0808691
51	0.394725	0.387309	0.410996	0.421208	0.458945	0.476285	0.462269	0.475484	0.465597	0.479055	0.485439	0.480166	0.475623	0.465032	0.425457	0.399886	0.347493	0.347493	0.3171	0.283525	0.277972	0.230133	0.230133	0.170095	0.126536	0.120099	0.102264	0.102264	0.087423	0.0847049
52	0.386732	0.404983	0.407041	0.417756	0.428479	0.443911	0.443911	0.469907	0.463058	0.472633	0.459048	0.461452	0.463857	0.453346	0.444877	0.40761	0.360956	0.351941	0.351941	0.314364	0.272078	0.246328	0.212952	0.162309	0.165864	0.13603	0.121431	0.124291	0.0950006	0.098306
53	0.396621	0.397476	0.407041	0.398834	0.403713	0.423728	0.423728	0.439427	0.465742	0.441805	0.452583	0.452688	0.437175	0.428923	0.42295	0.405968	0.388052	0.359222	0.359222	0.317766	0.274335	0.274463	0.25053	0.166574	0.171741	0.131508	0.12353	0.120472	0.100256	0.0999589
54	0.379471	0.397175	0.403308	0.376256	0.402785	0.419665	0.418862	0.440065	0.428894	0.429863	0.426823	0.431461	0.4343	0.426941	0.407104	0.383801	0.374278	0.374278	0.34202	0.314422	0.295895	0.287242	0.287242	0.249372	0.223865	0.177379	0.114388	0.114388	0.119105	0.110042
55	0.373011	0.383341	0.374403	0.391485	0.406172	0.395019	0.410168	0.408058	0.410785	0.41531	0.435026	0.431609	0.426357	0.422847	0.432735	0.409341	0.40571	0.355183	0.354801	0.327416	0.327416	0.296401	0.283934	0.257459	0.249266	0.229303	0.217068	0.172676	0.172676	0.11998
56	0.361523	0.366296	0.366296	0.391058	0.398525	0.42789	0.416291	0.410459	0.417777	0.419969	0.425124	0.41033	0.404091	0.421653	0.421653	0.390191	0.391033	0.385159	0.366869	0.344508	0.32421	0.303017	0.267129	0.241941	0.245371	0.257992	0.256724	0.219895	0.210542	0.211518
57	0.375545	0.375643	0.38129	0.398371	0.422552	0.410017	0.412514	0.414638	0.415005	0.414549	0.413503	0.413503	0.418265	0.414393	0.400704	0.409113	0.398454	0.396097	0.369431	0.356523	0.331537	0.332695	0.311804	0.302729	0.290081	0.284747	0.276104	0.268574	0.266236	0.205525
58	0.390219	0.377649	0.387029	0.392705	0.414409	0.432092	0.413435	0.415444	0.417587	0.422858	0.413239	0.405158	0.406921	0.404512	0.406599	0.398703	0.397516	0.384716	0.388436	0.347837	0.337492	0.329943	0.329837	0.315953	0.302471	0.300267	0.304792	0.275907	0.240916	0.208579
59	0.394903	0.389972	0.402715	0.41483	0.422261	0.436488	0.442949	0.436921	0.423535	0.420438	0.417864	0.414473	0.410804	0.426795	0.419032	0.408558	0.395712	0.379167	0.376848	0.358303	0.369847	0.357774	0.351668	0.340212	0.33014	0.32614	0.307994	0.291051	0.267006	0.260842
