# Supplementary material for: Unexpected long-term variations of Saturn’s ring current revealed by energetic neutral atom imaging
Source: Research Square preprint supplement (doi:10.21203/rs.3.rs-3271171/v1), 2023-09-18
Supplement: Supplementary file 11 [file 66d306b922d00154db3b6d87.xlsx]

## Sheet: Sheet1
Fig. 3c
Year		2007.17	2008.38	2009	2009.33	2013.25	2013.75	2016.75
Energy Content		2.5609e+13	2.15873e+13	1.99151e+13	19608159093453	8.6844e+12	8.30488e+12	1.57167e+13
Upper Limit		3.35444e+13	2.88612e+13	2.77117e+13	2.58999e+13	1.33928e+13	12144400621028	2.1219e+13
Lower Limit		1.88687e+13	1.5689e+13	1.39525e+13	1.42292e+13	5.47664e+12	5.26023e+12	1.10615e+13
Parameters for Sine Fitting			f(x)=a+b*sin(π*(x+c)/d)
	a		b		c		d
	17535100000000		9027700000000		703.751		7.55836
