# Supplementary material for: Unexpected long-term variations of Saturn’s ring current revealed by energetic neutral atom imaging
Source: Research Square preprint supplement (doi:10.21203/rs.3.rs-3271171/v1), 2023-09-18
Supplement: Supplementary file 12 [file 9400426c43d84d093e843fc2.xlsx]

## Sheet: Period6_ENA density
	0	1	2	3	4	5	6	7	8	9	10	11	12	13	14	15	16	17	18	19	20	21	22	23	24	25	26	27	28	29	30	31	32	33	34	35	36	37	38	39	40	41	42	43	44	45	46	47	48
0	1.34313	1.39234	1.37452	1.37452	1.39213	1.412	1.38841	1.41396	1.44376	1.4214	1.38866	1.38834	1.38852	1.38816	1.4077	1.46792	1.46817	1.48225	1.49796	1.4988	1.59157	1.59504	1.59157	1.62134	1.69694	1.77464	1.78225	1.79895	1.85105	1.85105	1.85105	1.85105	1.85105	1.8522	1.75033	1.82663	1.89217	1.98129	1.98534	2.1264	2.08152	2.09885	2.07597	2.10158	1.96353	2.1264	2.05424	2.12682	2.1264
1	1.4214	1.37328	1.37328	1.31252	1.37418	1.37328	1.37299	1.36456	1.41396	1.3956	1.38816	1.38816	1.38816	1.38816	1.38816	1.41988	1.46754	1.49004	1.4988	1.4988	1.59187	1.59504	1.59504	1.59504	1.71969	1.83765	1.69625	1.79101	1.82912	1.85105	1.8522	1.852	1.84791	1.90497	1.89625	1.89524	1.93002	1.92397	1.91058	2.08808	2.09254	2.08152	2.13086	2.12691	2.1264	2.20528	2.12735	2.12724	2.12724
2	1.37345	1.4214	1.40809	1.37398	1.30382	1.29168	1.23235	1.24726	1.27366	1.32837	1.31559	1.39101	1.38867	1.38816	1.39479	1.46754	1.46792	1.47042	1.46754	1.52736	1.59227	1.60844	1.59743	1.62134	1.82152	1.96544	1.83368	1.86001	1.86891	1.86891	1.86487	1.90115	1.85105	1.91058	1.89486	1.91205	1.96548	1.91656	1.91058	1.98946	2.08152	2.15196	1.94332	1.92978	2.15719	2.25481	2.3938	2.30378	2.12724
3	1.36043	1.37328	1.37328	1.35564	1.29352	1.22373	1.21058	1.22345	1.22345	1.22345	1.29092	1.3328	1.40209	1.41396	1.41396	1.46754	1.46754	1.4988	1.46754	1.48746	1.59192	1.59504	1.59535	1.69625	1.8532	2.00184	1.8828	1.83765	2.04205	1.90162	1.90162	1.84966	1.85105	1.95436	1.91058	1.91658	1.9791	2.01861	1.88541	2.00487	2.071	1.96151	2.15541	2.20528	2.18791	2.22988	2.44735	2.44842	2.43624
4	1.2428	1.25983	1.29256	1.30382	1.27503	1.22669	1.22457	1.17121	1.22427	1.20736	1.29337	1.25222	1.38816	1.3875	1.41396	1.44025	1.46804	1.4988	1.49912	1.59554	1.5939	1.60844	1.60957	1.68584	1.86936	1.94402	1.89669	1.89047	1.83759	1.9551	2.09554	1.93878	1.90209	1.94928	2.06746	1.91058	2.11934	2.13161	2.05843	2.15292	2.1189	2.12521	2.22463	2.22488	2.25186	2.34282	2.52857	2.45425	2.43624
5	1.20033	1.24209	1.22395	1.2587	1.30382	1.22345	1.22399	1.16563	1.1998	1.15611	1.22345	1.22602	1.30382	1.37576	1.41379	1.41437	1.41396	1.49582	1.49912	1.59653	1.69625	1.59157	1.59319	1.62026	1.78258	1.86891	1.79572	1.94837	1.77515	1.923	2.05026	1.90681	1.89299	1.9516	2.07182	2.07182	2.24852	2.20238	2.26273	2.33428	2.13533	2.14884	2.34917	2.49006	2.38986	2.44247	2.43754	2.40566	2.4182
6	1.22392	1.22392	1.23537	1.22444	1.24261	1.21749	1.17737	1.17709	1.22345	1.17593	1.22427	1.30382	1.30446	1.30382	1.38816	1.41396	1.42289	1.44025	1.49582	1.50037	1.60844	1.60341	1.60481	1.76621	1.76621	1.87916	1.89669	1.8222	1.85105	2.06822	2.19279	2.06822	2.1054	2.12268	2.10228	2.01792	2.1213	2.15473	2.3191	2.35908	2.28817	2.28758	2.39728	2.49006	2.50744	2.56977	2.61123	2.65653	2.50778
7	1.20339	1.24261	1.22345	1.22395	1.2237	1.21388	1.19289	1.21749	1.22345	1.16563	1.22392	1.29737	1.38928	1.41396	1.40602	1.41445	1.41396	1.44025	1.49912	1.59157	1.59826	1.59157	1.62991	1.87083	1.82072	1.67198	1.89669	1.89669	2.02233	2.30798	2.29726	2.26379	2.27741	2.17452	2.15844	2.27722	2.27722	2.36265	2.33911	2.43883	2.4684	2.40009	2.47516	2.53722	2.48632	2.54673	2.6435	2.70956	2.82792
8	1.18366	1.22395	1.24147	1.2428	1.1917	1.24243	1.20457	1.1661	1.1804	1.22239	1.22366	1.22345	1.33746	1.39926	1.41483	1.4214	1.44297	1.44025	1.53177	1.50823	1.62354	1.59157	1.7768	1.77122	1.75566	1.72304	1.85105	1.9682	2.16975	2.31341	2.26327	2.41137	2.21229	2.35312	2.28395	2.33576	2.28459	2.45979	2.52905	2.5738	2.6624	2.60194	2.65672	2.68401	2.75103	2.76703	2.8282	2.82792	2.82792
9	1.17681	1.21114	1.24777	1.25129	1.24726	1.2914	1.25894	1.17238	1.16918	1.20707	1.22345	1.24561	1.30382	1.31038	1.41396	1.41483	1.48365	1.46253	1.60943	1.68661	1.70733	1.76819	1.87875	1.90188	1.90562	1.72304	1.85105	2.05494	2.22525	2.26382	2.36294	2.40683	2.53422	2.29212	2.42607	2.5208	2.44081	2.58434	2.58316	2.55591	2.56376	2.53273	2.65651	2.69047	2.69047	2.93806	2.88142	2.92055	2.91325
10	1.14791	1.26481	1.32534	1.26599	1.26735	1.29092	1.28777	1.21749	1.17737	1.22427	1.2428	1.30382	1.30382	1.35514	1.42289	1.4214	1.44025	1.50227	1.65432	1.75107	1.74698	1.83739	1.75753	2.10258	2.14786	2.05967	1.90387	1.89669	2.16731	2.35409	2.51427	2.35362	2.5699	2.52961	2.51437	2.6204	2.75151	2.81204	2.69053	2.6762	2.73641	2.7767	2.70005	2.78751	2.66929	2.88051	3.05208	3.09312	3.11959
11	1.12174	1.17709	1.26314	1.26838	1.26201	1.30382	1.29686	1.2166	1.21749	1.22345	1.30469	1.33956	1.34195	1.39877	1.43232	1.44025	1.54118	1.65951	1.68273	1.7903	1.77739	1.83075	1.7383	2.10088	2.24391	2.15344	2.18878	2.24763	2.24993	2.32838	2.50745	2.31339	2.63579	2.58304	2.59057	2.68999	2.82792	2.81204	2.75158	2.75337	2.71282	2.82542	2.95748	3.09037	2.84403	2.96872	3.03695	3.08193	3.23133
12	1.17561	1.14914	1.27998	1.29272	1.29636	1.31319	1.28002	1.22401	1.29368	1.27915	1.36721	1.36522	1.37373	1.39128	1.58383	1.48265	1.49966	1.72617	1.77018	1.84502	2.01507	2.03403	1.78988	1.97765	2.14655	2.14146	2.40247	2.45291	2.47021	2.50473	2.58219	2.50977	2.50369	2.55968	2.61388	2.72397	2.83342	2.82845	2.77875	2.76508	2.77027	3.02221	3.08709	3.16037	3.10044	3.10607	3.08193	3.13155	3.21545
13	1.12521	1.1857	1.23691	1.23825	1.27062	1.26589	1.30382	1.22765	1.24777	1.345	1.37295	1.34795	1.37373	1.37328	1.49032	1.71688	1.8047	1.86891	1.87498	1.80435	2.10152	2.09384	2.09855	2.23277	2.38991	2.14928	2.34133	2.46571	2.49679	2.64211	2.63436	2.75828	2.70021	2.61361	2.59814	2.75211	2.77241	2.79703	2.7099	2.81657	2.85096	3.11894	3.15661	3.17526	3.19109	3.19009	3.08193	3.11485	3.23042
14	1.17642	1.16575	1.28033	1.22338	1.14506	1.28353	1.31318	1.28355	1.25367	1.30021	1.3156	1.30416	1.33799	1.41104	1.58675	1.73511	1.80368	1.80536	1.86573	1.83326	2.28019	2.28414	2.43931	2.40518	2.48962	2.29807	2.33118	2.18271	2.33437	2.55837	2.73796	2.81204	2.73719	2.75674	2.78099	2.82814	2.85822	2.81362	2.75151	2.83071	3.01322	3.20299	3.23054	3.24764	3.4163	3.2889	3.16873	3.22283	3.29252
15	1.345	1.33851	1.26314	1.23084	1.2289	1.34271	1.345	1.345	1.24777	1.345	1.34588	1.30382	1.37328	1.49582	1.78659	1.94603	1.82498	1.70227	1.87251	1.85728	2.15674	2.29055	2.24906	2.27021	2.34051	2.34359	2.39091	2.47096	2.61546	2.66752	2.74436	2.82369	2.8428	2.81241	2.81241	2.88051	2.88051	2.88029	2.88976	2.90178	3.08259	3.20552	3.37862	3.49273	3.57004	3.38781	3.19111	3.29861	3.44652
16	1.4998	1.40113	1.36476	1.26314	1.24602	1.345	1.37394	1.34541	1.34874	1.36502	1.45332	1.37084	1.51761	1.58227	1.94432	2.10547	1.97736	1.90155	1.95374	1.83089	1.9716	2.18135	2.19222	2.33975	2.42754	2.4454	2.44716	2.63839	2.73028	2.70858	2.75151	2.76394	2.80813	2.81241	2.88051	2.99164	3.07554	3.00137	3.09179	3.11865	3.204	3.26649	3.45762	3.45934	3.56378	3.4786	3.43309	3.50915	3.66279
17	1.35271	1.345	1.39898	1.39898	1.34972	1.37106	1.49053	1.37687	1.37393	1.40771	1.59571	1.70026	1.65466	1.73412	1.93231	1.92805	1.92993	1.99845	2.13275	2.06786	1.97671	2.26399	2.22333	2.4716	2.49452	2.48017	2.5264	2.70835	2.75151	2.74655	2.8428	2.78287	2.88885	2.86018	2.84683	2.99164	3.02652	3.15888	3.33402	3.28391	3.33741	3.41716	3.51125	3.58997	3.75709	3.74169	3.67234	3.65088	3.72901
18	1.34946	1.34946	1.38098	1.35942	1.39898	1.39064	1.57278	1.39197	1.49115	1.45698	1.58192	1.77299	1.83343	1.84212	1.8754	1.90647	2.03839	2.13275	2.13235	2.10674	2.1325	2.35349	2.40387	2.56398	2.58244	2.49508	2.495	2.5832	2.80708	2.76519	2.86143	2.87912	2.90213	3.01616	3.04938	3.10639	3.37638	3.35033	3.46236	3.58447	3.50419	3.76748	3.83498	3.87742	3.95729	3.98355	3.9037	3.89423	3.92884
19	1.41629	1.50009	1.34946	1.37379	1.44733	1.54439	1.75069	1.6549	1.4988	1.64684	1.67294	1.6832	1.84212	1.86432	1.78306	1.96037	2.06374	2.13235	2.15195	2.28346	2.50246	2.49786	2.60801	2.60764	2.64632	2.55237	2.58258	2.75151	2.83623	2.82829	2.90234	2.99164	3.1268	3.08755	3.32293	3.25428	3.4162	3.58504	3.82092	3.81704	3.66464	3.88366	3.9516	4.12837	4.12011	4.13878	4.65854	4.33718	4.30313
20	1.51721	1.4214	1.37373	1.40236	1.44235	1.59161	1.7392	1.78853	1.61677	1.65309	1.74929	1.90714	1.8875	1.88846	1.76102	1.84212	2.20349	2.31688	2.37043	2.50246	2.54153	2.71232	2.7577	2.6262	2.70959	2.72786	2.73924	2.83588	2.90163	2.93091	2.93852	3.08755	3.23392	3.28381	3.42287	3.42934	3.53287	3.66288	3.66324	3.84051	3.83389	3.97533	4.12192	4.34469	4.66523	4.7525	5.29106	5.30814	4.64344
21	1.51247	1.50357	1.42187	1.48325	1.50357	1.61192	1.71802	1.95176	1.85529	1.81652	1.87268	1.95176	2.09167	2.09167	2.09212	2.13226	2.28777	2.43568	2.56441	2.60056	2.71284	2.71258	2.945	2.82706	2.86219	2.72569	2.80289	2.96975	2.94166	2.97749	3.05207	3.35179	3.42992	3.48134	3.57218	3.6237	3.6501	3.70209	3.83432	4.00396	4.03337	4.17387	4.18978	4.39087	4.93799	6.06675	6.66166	5.85823	5.58821
22	1.4214	1.64137	1.5218	1.55698	1.65917	1.71802	1.77293	1.95176	1.9412	2.02414	2.08475	1.99621	2.05504	2.16537	2.20242	2.26333	2.45086	2.51437	2.52085	2.52914	2.69456	2.79071	3.085	2.9029	2.90184	2.92406	3.00244	3.05232	3.17791	3.18743	3.35596	3.60672	3.33113	3.41226	3.61388	3.69607	3.80305	3.92541	3.87276	4.12727	4.32002	4.3066	4.38329	4.46237	5.00578	6.74166	7.78281	8.73413	8.40187
23	1.35666	1.52688	1.4994	1.50775	1.64537	1.78664	1.73651	1.95208	1.97304	1.95934	1.97074	2.05647	2.09209	2.1674	2.16564	2.26361	2.48723	2.47468	2.534	2.60764	2.74704	2.79251	3.16059	3.09401	2.97279	2.99426	2.97579	3.16103	3.39285	3.45006	3.6771	3.84553	3.65843	3.52448	3.78827	3.92812	3.87363	4.00841	4.01899	4.25565	4.39909	4.91336	4.548	4.53605	5.57219	7.33871	8.48204	9.33261	9.12376
24	1.41003	1.35531	1.40152	1.47537	1.6862	1.75099	1.77502	1.95176	1.82459	1.91373	1.95228	1.99051	2.05983	2.14461	2.13251	2.26333	2.29039	2.50841	2.5285	2.72708	2.86711	2.95741	3.15174	3.1509	3.16165	3.18677	3.05139	3.23911	3.4682	3.496	3.77353	3.82243	3.78973	3.75319	3.80294	3.9144	4.08486	4.49043	4.51594	4.23138	4.61171	4.76339	4.49763	4.94069	5.24324	6.60683	8.23327	9.54544	9.76258
25	1.37382	1.4214	1.53119	1.40065	1.58512	1.69973	1.55965	1.80289	1.95176	1.98264	1.96436	1.95227	2.05711	2.09154	2.1032	2.15987	2.3133	2.57172	2.73314	2.85386	2.95787	3.13631	3.19409	3.24317	3.1571	3.17734	3.39865	3.42779	3.64769	3.6237	3.78941	3.87459	3.78973	3.82484	3.7907	4.05481	4.12727	4.50819	4.80545	4.85693	5.18807	5.70727	5.07214	5.40095	6.49982	8.39914	8.9155	9.72354	10.181
26	1.36459	1.4214	1.46442	1.47271	1.58551	1.67165	1.63272	1.86272	1.77116	1.97945	1.95176	2.02628	2.09536	2.09256	2.14155	2.23455	2.5129	2.679	2.72269	2.90296	2.89493	3.06082	3.19856	3.30329	3.23561	3.36302	3.39713	3.52501	3.69726	3.65736	3.82222	3.91555	3.79062	4.08714	4.0144	4.03263	4.37636	4.51761	4.8652	5.52462	6.46887	6.23091	5.78818	7.2546	9.2025	9.04982	8.9166	9.80693	9.1558
27	1.29356	1.29356	1.36066	1.68698	1.7014	1.72734	1.75077	1.86645	1.91463	1.94007	1.99478	2.13937	2.12863	2.14601	2.19657	2.2405	2.28824	2.5342	2.71834	2.86959	2.95741	2.98278	3.08053	3.22283	3.34571	3.61829	3.4577	3.53915	3.69496	3.77155	3.89264	4.07458	4.02728	4.17671	4.11358	4.29112	4.73638	5.03817	5.80282	5.62316	6.1609	6.77628	6.71874	7.74639	9.64514	9.81385	10.9464	11.6799	11.3167
28	1.31207	1.32168	1.32677	1.5988	1.64323	1.70079	1.81246	1.91995	1.90828	1.97458	2.09446	2.1296	2.16264	2.19657	2.26465	2.23257	2.26361	2.55173	2.74648	2.85524	2.84611	2.99164	3.08948	3.13894	3.18306	3.62563	3.65813	3.6386	3.90992	3.86308	4.11849	4.26493	4.41594	4.56708	4.56827	4.66945	6.06943	6.83124	8.2811	6.64132	6.69835	6.30206	6.99119	9.12142	9.49965	10.5934	11.3167	12.3035	11.6464
29	1.41218	1.41092	1.33664	1.5967	1.6982	1.80315	1.8402	1.89963	1.97521	2.09715	2.0303	2.15021	2.15021	2.18705	2.22463	2.27747	2.48078	2.58826	2.72723	2.82848	2.82414	2.98781	3.14613	3.24509	3.22352	3.58997	3.61938	3.69217	3.87306	4.26662	4.39692	4.61655	4.68005	4.91211	5.82661	6.39925	7.67161	9.0578	9.68482	9.66511	8.8875	9.37676	9.40006	9.90181	11.3068	12.1193	12.7741	13.0625	12.863
30	1.6378	1.40602	1.40621	1.47548	1.62346	1.80788	1.93193	1.93348	2.02903	2.15021	2.15021	2.22862	2.169	2.2278	2.24893	2.34093	2.68214	2.84118	2.79374	2.93213	2.91657	3.13822	3.22213	3.43205	3.30932	3.6128	3.6782	3.73407	3.96917	4.31835	4.61655	4.82254	4.96885	5.1212	7.46485	7.61623	8.44301	9.23834	10.9882	11.3283	10.4198	10.5993	11.4914	11.18	12.1548	11.8241	13.7284	14.9988	14.4262
31	1.58464	1.60519	1.70945	1.60836	1.72815	1.7062	1.96734	2.03497	2.12998	2.18395	2.1507	2.18428	2.22204	2.31396	2.37288	2.51435	2.82306	3.03204	3.00544	3.10888	3.1855	3.28428	3.34084	3.36076	3.36948	3.65412	3.72362	3.93016	4.23891	4.45494	4.87867	5.00851	5.05002	5.38251	6.05011	8.13314	8.79712	9.42098	11.9194	12.4143	12.5347	13.5251	13.1016	13.567	14.0462	13.6918	14.8771	15.5537	15.354
32	1.67563	1.72142	1.72094	1.65988	1.79637	1.85387	1.97503	2.05279	2.09464	2.18464	2.21176	2.32515	2.47709	2.54852	2.64117	2.8389	2.9842	2.95965	2.89605	3.00465	3.15513	3.28179	3.33802	3.37862	3.51634	3.86006	3.8777	4.17708	4.3981	4.51291	4.78983	5.04952	6.04245	6.77158	7.36655	8.9406	10.7339	11.7106	12.4205	12.7211	13.2134	13.8485	14.0115	14.1538	14.7718	14.7673	15.7646	15.8577	15.9878
33	1.7562	1.73422	1.7417	1.73702	1.84739	1.883	2.09143	2.1315	2.15081	2.18234	2.21371	2.2614	2.51068	2.58184	2.7746	2.92861	2.98438	3.09654	3.09826	3.14335	3.16616	3.37339	3.63773	3.55929	3.78387	4.09678	4.25279	4.26891	4.50119	4.72242	4.9485	5.42945	7.0276	7.80004	9.29828	10.5559	12.0709	11.9829	11.9791	12.6859	13.9247	14.0375	14.9779	16.0928	15.9933	15.8823	16.102	16.9214	16.8855
34	1.67324	1.78964	1.80633	1.79124	1.83907	1.89917	1.9848	2.16692	2.19281	2.2442	2.2856	2.52101	2.64951	2.79242	2.80708	2.96301	3.14979	3.16439	3.22532	3.13781	3.20299	3.39802	3.67491	3.7223	3.88033	4.22665	4.3534	4.51461	4.50169	5.03775	5.56062	6.1485	7.88161	8.16775	9.06905	11.3781	11.6561	11.6183	12.2347	13.516	14.2967	15.4643	15.7699	15.9504	16.7688	16.6084	17.1117	17.2066	17.2641
35	1.71737	1.71759	1.8059	1.8828	1.8828	1.84768	1.97631	2.16775	2.20026	2.48641	2.43843	2.55185	2.76874	2.87176	2.9842	3.03401	3.1166	3.33723	3.33762	3.34981	3.436	3.5595	3.66862	3.72037	3.9462	4.31167	4.3981	4.47443	4.76768	5.01518	5.89955	6.92963	9.40746	10.2509	11.1181	11.7247	11.9672	12.7188	12.7203	14.1851	14.3201	16.1384	16.5603	16.7195	17.3094	17.4733	17.38	18.0697	17.6571
36	1.83469	1.88655	1.93191	1.94021	1.78772	1.8828	1.94134	2.185	2.42129	2.63927	2.64977	2.76689	2.76689	2.84218	3.05911	3.08768	3.12153	3.31741	3.4206	3.398	3.45186	3.53537	3.79705	3.87183	4.10316	4.27822	4.44926	4.63488	5.00089	5.39475	5.6097	6.4506	9.30603	11.0978	12.5806	11.5957	12.726	12.8116	13.9444	14.6759	15.3348	16.2052	17.1391	17.376	17.7718	18.2448	18.552	18.7134	18.8255
37	1.84587	1.94928	2.03572	2.10273	2.05149	2.04931	2.10602	2.2482	2.55461	2.65355	2.70706	2.7633	2.83443	2.91626	3.04633	3.06929	3.20809	3.40004	3.61633	3.64107	3.52284	3.59843	3.64107	3.89751	4.11026	4.38427	4.65763	5.028	6.36216	6.32019	6.92854	8.2661	11.3314	11.7834	12.8096	12.3538	12.6973	13.2013	14.0321	14.7374	16.2905	16.9637	17.816	18.4779	19.1578	19.4591	19.0396	18.9735	19.0499
38	1.94928	2.02666	2.12412	2.18072	2.24366	2.27366	2.31156	2.35392	2.56635	2.68138	2.71778	2.72392	2.76947	2.95848	3.06179	3.19818	3.38074	3.73197	3.89497	3.95115	3.88492	3.95313	3.83994	4.01332	4.28851	4.78457	5.06167	5.36607	6.50984	7.94567	8.65295	11.0296	11.6941	12.8715	13.4635	13.1613	14.2901	13.9722	14.563	15.918	16.4554	17.0118	17.6613	18.3876	18.9827	19.4511	19.6353	20.1669	20.4478
39	1.88668	1.99184	2.00387	2.13533	2.26891	2.57366	2.42998	2.5615	2.59802	2.62575	2.68072	2.72816	2.77443	2.9697	3.20888	3.3839	3.39974	3.75641	3.93243	4.18399	4.15009	4.31454	4.35434	4.59321	4.766	5.64336	6.4938	7.38847	8.22957	9.47692	9.24135	11.787	12.1309	12.9696	14.3533	14.0997	15.5653	15.4346	16.0483	16.7523	17.6808	18.1387	18.1391	18.8339	19.6601	20.6285	20.7329	20.8101	20.7987
40	1.78428	2.01698	2.05977	2.24425	2.40422	2.56757	2.5259	2.59097	2.63366	2.74803	2.75727	2.80953	2.82554	3.14746	3.31208	3.46346	3.57675	3.74436	3.98697	4.29866	4.2796	4.54513	4.54792	4.72206	5.34281	6.39465	8.40897	10.1017	9.8752	10.707	12.0244	13.0722	12.9787	14.1226	14.6928	14.7388	15.6296	16.5101	16.9442	17.4338	18.1573	18.5391	18.7366	19.4774	19.9565	20.9293	21.0922	20.7006	21.5671
41	1.84531	2.03333	2.07674	2.1456	2.29265	2.45532	2.57688	2.76183	2.87385	2.93302	3.02634	2.95556	2.94569	3.14072	3.3714	3.52454	3.74809	3.99313	4.27341	4.46852	4.46931	4.40009	4.57896	5.22449	6.24588	7.56656	8.64735	10.1724	10.4616	10.9242	12.0147	12.9193	14.07	15.0632	15.6382	15.8304	16.0778	16.651	17.6119	17.9272	18.5116	18.7964	19.1501	19.8492	20.6471	21.2424	21.6147	21.5744	21.7075
42	1.91675	2.18767	2.0551	2.27871	2.5615	2.56757	2.65278	2.8262	2.91454	2.86766	2.94552	3.20292	3.22473	3.32041	3.54928	3.66827	3.93885	4.27478	4.46295	4.60976	4.53366	4.46902	4.82616	5.6992	6.9578	7.61104	8.88162	11.2998	11.6464	10.9348	12.4062	13.4437	14.9823	16.0464	16.4878	17.1078	17.509	17.6235	17.7599	18.2826	18.7699	19.7984	20.0158	20.9795	21.0132	21.2478	21.8653	21.4076	21.3827
43	2.08492	2.25102	2.19396	2.25717	2.46809	2.60466	2.79666	2.84876	2.80558	2.7526	2.79666	2.99906	3.1417	3.40045	3.46174	3.59178	3.89119	4.15602	4.3491	4.55004	4.61207	4.81165	5.13584	6.00517	7.54257	9.28494	10.4192	11.0498	11.8264	12.4122	13.4428	13.6078	15.3631	16.1673	16.8907	17.8787	17.6891	18.268	18.6193	18.8765	19.7163	20.2602	20.9018	21.4994	22.1363	22.2913	22.3599	21.8889	21.5946
44	1.90338	1.95401	2.04122	2.32204	2.33943	2.51391	2.62379	2.7839	2.80708	2.79706	2.88602	2.99441	3.01545	3.3265	3.44943	3.50295	3.73051	3.90435	4.25675	4.46883	4.61973	5.41747	6.80681	7.35227	8.55728	10.6522	11.0326	10.9186	12.0193	13.4108	13.9084	14.6133	15.5662	16.7115	17.4634	18.1583	18.3277	18.6578	19.3526	19.5958	20.0228	20.5108	20.7534	21.5313	22.2147	22.3409	22.5077	22.2205	22.7747
45	2.05297	2.13533	2.20436	2.377	2.43386	2.58588	2.69952	2.75742	2.79666	2.79706	2.81816	3.03626	3.08091	3.33402	3.44609	3.57471	3.7528	3.98777	4.29171	4.3363	4.94864	5.43476	7.17257	7.21252	7.62972	8.77351	9.42886	10.4975	12.9065	13.869	14.7072	14.511	16.1488	17.024	17.5475	18.101	19.0386	19.329	19.9109	20.1594	20.7698	21.0571	21.8702	22.3095	22.7748	22.8745	23.3364	23.5862	23.484
46	1.99119	2.14219	2.20446	2.29452	2.36225	2.36057	2.45122	2.62574	2.70655	2.78327	2.82403	3.04488	3.16412	3.41877	3.61618	3.61667	3.92284	4.10256	4.20803	4.42883	5.02243	5.39405	7.48496	8.22585	9.28519	10.8917	11.4231	12.517	13.0487	13.9901	15.4178	15.5591	17.132	17.7429	18.4912	18.9437	19.7174	19.8211	20.3691	20.2488	20.7993	21.8905	22.076	22.7263	22.6373	23.1195	23.8547	22.8949	22.9279
47	1.99728	2.14426	2.19723	2.45112	2.46056	2.46037	2.60564	2.85567	2.95943	3.15542	3.29874	3.27564	3.28631	3.5847	3.86793	3.95428	4.00424	4.4167	4.52004	4.80829	5.27554	5.88861	6.92838	8.28779	10.2242	11.458	12.8789	13.6669	13.9359	14.5418	16.1306	16.6701	17.5645	17.7679	18.3016	18.6227	19.884	20.0251	20.3104	21.2583	21.3294	21.7556	22.0058	23.8322	23.7195	23.3106	23.6421	23.5746	22.9922
48	2.13019	2.18062	2.26296	2.3546	2.46271	2.47406	2.57832	2.83395	2.9166	3.12976	3.12156	3.16705	3.22039	3.67614	3.95722	4.07185	4.27539	4.62191	4.90969	5.02924	6.2775	6.27638	6.91505	9.09387	11.1796	12.0766	13.6695	13.6946	14.5358	15.0448	15.8075	16.3338	17.1418	17.9717	18.2908	18.9804	20.034	20.2141	21.1007	22.5834	23.2536	22.8107	22.999	23.0733	23.1533	24.0716	23.2047	23.1029	23.0039
49	2.19749	2.17428	2.20129	2.35061	2.38239	2.45442	2.67061	2.82185	2.98933	3.27696	3.26264	3.32295	3.40995	3.88009	4.07164	4.33954	4.44072	4.67923	4.80493	5.34394	7.03475	6.5532	8.02537	9.40352	11.1206	12.8785	13.1703	14.3283	15.3698	16.1834	16.8001	17.2392	17.7363	18.0577	18.8648	18.8687	19.3904	21.0176	22.7343	24.9564	25.5926	24.869	23.7312	23.5274	24.8902	24.7511	23.9494	23.3167	22.7308
50	2.23176	2.32048	2.45594	2.5581	2.57585	2.58494	2.81729	2.96153	3.14092	3.18104	3.14926	3.2476	3.33825	3.77004	4.05794	4.44715	4.73162	4.74566	4.84211	5.10274	6.42786	6.85319	9.4859	10.53	12.73	14.0817	14.5047	14.9718	15.7118	16.8744	16.9688	17.2839	17.9336	18.5131	19.0881	19.1843	20.2681	20.9899	23.6338	25.1372	25.8992	24.9595	24.2168	23.7558	25.4839	24.2517	23.6321	23.1589	22.9445
51	2.32692	2.47305	2.47999	2.62562	2.77237	2.72212	2.69577	3.03704	3.20391	3.24112	3.33694	3.39832	3.44743	3.60385	3.90492	4.24273	5.41329	4.95964	5.37969	6.20709	6.46839	7.16988	8.67501	10.9985	13.514	13.4443	13.7058	14.9515	16.4241	17.0079	17.0876	17.7141	18.1557	18.6085	19.1911	20.1281	21.0407	21.9533	23.1135	24.0372	26.2657	24.9198	24.6189	24.515	25.0458	24.3951	23.6422	22.9424	23.0779
52	2.26392	2.36186	2.61047	2.72407	3.00527	2.98832	2.82273	3.08405	3.25772	3.20286	3.338	3.48052	3.58276	3.67976	3.88784	4.2788	4.63431	4.80318	5.08595	6.00866	8.01588	9.17038	10.0821	12.4943	13.3986	14.1199	14.5605	15.0304	16.4591	16.8259	17.4186	18.4079	18.8454	19.0229	20.2819	20.8021	21.9669	22.3041	23.7454	25.0316	26.3872	25.6396	25.1264	24.0194	25.155	24.8398	24.332	23.5802	22.9455
53	2.15801	2.3577	2.46445	2.78513	3.00231	2.99093	2.99094	3.13299	3.22695	3.29876	3.48109	3.54465	3.77056	3.88192	4.09654	4.29021	4.5112	4.70718	5.37553	6.06575	7.26333	9.34364	11.1964	13.3318	13.4526	14.6523	14.9882	15.1386	16.0608	16.6586	17.6542	18.5037	19.4413	19.4686	20.2681	21.4731	23.0072	23.8625	24.2781	24.8637	25.8162	25.3435	25.7855	24.8807	25.5232	25.1729	23.9708	23.5762	22.9679
54	2.20049	2.42997	2.59161	2.7131	2.87344	3.14335	3.3047	3.33926	3.43289	3.40018	3.50174	3.57409	3.84937	4.11256	4.16129	4.34148	4.52713	4.99323	5.53129	6.62796	8.80891	9.92012	11.2108	13.0886	13.4966	14.7155	15.4903	15.8691	16.9153	17.2154	17.9159	18.3807	20.3616	20.3223	21.2198	22.2899	23.0355	24.4029	24.9955	25.8342	26.2472	26.2025	26.2544	26.349	25.4935	24.5435	23.2227	23.2758	22.2937
55	2.20255	2.43346	2.63993	2.88629	2.9277	2.99229	3.00758	3.20325	3.30684	3.321	3.44368	3.57781	3.80411	4.28227	4.42375	4.65493	4.82838	5.73856	6.53813	8.48496	8.58927	8.48764	10.9129	11.9263	12.5419	14.6188	15.5513	16.5268	16.9577	17.4283	18.532	19.3809	20.6281	20.9656	21.8927	23.141	23.6418	24.5003	25.213	25.608	26.5163	26.5396	25.9923	25.6865	25.3797	24.7852	24.0218	22.9888	21.7329
56	2.32293	2.43591	2.65374	2.77682	2.8286	2.96802	3.01423	3.204	3.32111	3.32071	3.47288	3.67484	3.86812	4.20261	4.67414	4.93229	5.03982	5.28559	6.57596	8.76594	9.66605	11.2449	11.2846	11.8736	13.4519	14.5287	15.0244	16.0833	16.9648	17.8929	18.506	19.2414	20.0961	20.7563	21.5425	22.9351	23.1774	24.2118	24.7409	25.7524	25.9499	25.6219	25.0127	25.2132	24.8512	24.5955	24.0185	23.016	22.0579
57	2.57649	2.65002	2.70537	2.7793	2.7969	3.1419	3.21664	3.28485	3.28485	3.35754	3.51722	3.76559	3.89021	4.37986	4.87551	5.42393	6.07343	6.05344	7.5181	8.42305	9.26686	11.4671	12.3263	13.1939	13.8213	14.5288	15.3352	16.5942	16.9954	17.7574	18.6771	19.1585	20.0345	20.7926	22.3477	23.1005	23.0428	24.4656	23.8858	24.7669	25.6235	25.9289	25.7115	25.5734	25.6884	25.1066	24.1249	23.8304	22.5807
58	2.54487	2.59116	2.63414	2.76689	2.85589	2.95795	3.05671	3.18733	3.28013	3.47003	3.57085	3.80739	4.12873	4.32497	4.85244	5.22358	5.72538	5.93731	6.79209	7.30708	9.27	11.2443	12.2714	13.5075	14.3347	14.9799	15.7182	16.5827	17.179	17.9595	18.576	19.3339	20.2221	20.8505	22.1739	22.7252	23.2343	24.0572	25.6828	25.3848	25.1823	25.8591	26.1337	26.288	26.5914	24.8734	23.224	23.0259	22.0388
59	2.46113	2.4918	2.62039	2.63525	2.8184	2.9431	3.08858	3.18866	3.18205	3.25225	3.57674	3.65574	4.12395	4.50855	4.95983	5.14127	5.40835	5.77496	6.37962	8.81072	10.0235	11.0479	11.7681	12.771	14.0847	14.7831	15.9764	16.4389	17.7862	18.5062	18.7829	20.0545	20.6768	21.6664	22.6168	22.7864	23.4249	24.3051	25.7226	26.0611	26.2039	25.6951	26.4265	26.315	26.5287	25.7609	24.2819	23.1774	22.6518
60	2.50656	2.50593	2.50593	2.58262	2.80939	2.93203	2.98993	3.20468	3.27592	3.35629	3.49918	3.77155	4.10093	4.37893	5.01186	5.11931	5.69527	6.51595	7.95282	8.76751	10.0412	10.1843	11.4471	13.2502	14.7189	15.3629	16.4236	16.7163	17.4165	18.5483	19.2888	20.4671	21.0035	22.4973	23.304	23.2033	23.8147	25.4287	25.9581	26.2813	26.2511	26.3763	25.9778	25.739	25.6159	25.1556	24.4178	23.2655	22.3198
61	2.3324	2.43223	2.5164	2.68131	2.69489	2.8965	3.18588	3.38244	3.46147	3.40045	3.49918	3.72876	3.8773	4.37177	4.81552	4.96415	6.16935	6.72414	8.14236	9.11399	11.0043	11.5842	12.4119	13.2468	14.6916	15.7679	16.2843	16.4688	16.8168	17.848	19.1729	20.3498	22.4923	22.4946	23.3367	23.4976	24.4956	24.5648	25.3559	25.7635	26.0228	27.0803	27.0382	26.3662	26.1145	26.0504	24.3998	23.1642	21.7083
62	2.13797	2.41449	2.4354	2.50593	2.69385	2.88001	3.2492	3.47724	3.5242	3.58203	3.67343	3.84615	4.06934	4.64135	4.71043	4.85572	5.32001	6.2297	7.05668	8.45626	9.85429	11.3966	12.459	13.2875	14.8192	15.7382	16.2747	16.5103	17.3106	18.0064	19.1058	20.9065	21.8177	22.0113	22.9608	24.1161	24.7066	25.3641	25.7331	25.7796	26.4674	27.399	27.1957	26.6286	26.0339	25.3677	24.0491	23.181	21.5052
63	2.33257	2.50683	2.46373	2.54411	2.796	2.89742	3.17669	3.52801	3.58167	3.66266	3.78466	3.85936	4.28485	4.58293	4.66358	4.86759	5.9929	5.56931	7.58047	7.97727	9.47931	11.2551	12.7834	13.4768	14.836	15.7469	16.1865	16.7687	17.2476	17.8237	19.2873	20.294	21.1771	22.1288	23.1012	23.891	24.3293	24.088	26.1367	25.807	27.1821	27.9934	27.5461	27.5999	26.5765	25.2153	24.4193	22.7028	21.6608
64	2.34018	2.50593	2.60606	2.80313	2.88102	3.09609	3.23646	3.44695	3.58203	3.78402	3.85936	4.00902	4.31416	4.66358	4.66358	4.79471	5.23721	5.52075	7.18608	7.49819	10.3053	11.5918	12.8942	14.1097	15.1129	15.6897	16.0982	16.9233	17.3294	17.9501	19.2497	19.5103	20.1966	22.0922	23.6593	25.0246	24.8454	25.7224	26.8563	27.0248	27.5991	27.7395	27.4285	26.5256	26.0682	25.4582	24.3749	23.4151	22.2383
65	2.18301	2.37434	2.59559	2.69694	2.88001	3.25381	3.41535	3.48445	3.60298	3.69919	3.89367	4.09833	4.22191	4.53168	4.61412	4.77462	4.97915	5.7888	7.58645	10.1084	11.0833	12.0293	13.6879	14.4697	15.4575	15.7872	16.1553	16.312	17.3874	18.0683	19.0999	20.3925	21.3394	22.2535	23.1541	23.6615	24.4161	25.0914	26.4218	27.5707	27.9435	28.0135	27.4117	26.599	26.4779	25.3602	25.2304	23.3698	22.6462
66	2.19863	2.21265	2.49872	2.71036	2.77682	3.06663	3.34017	3.47236	3.74934	3.87523	3.85589	4.01156	4.08953	4.2801	4.51503	4.74775	5.39985	6.84333	8.67658	10.7954	12.1257	13.0804	13.8942	14.6894	15.1636	15.6703	16.2657	16.7509	17.1358	18.136	19.4475	20.3006	20.9783	22.7132	23.4124	24.1982	25.0092	25.3149	26.466	27.2624	27.6224	27.7213	27.7172	26.922	26.564	26.0219	24.6362	24.026	23.0155
67	2.1264	2.23868	2.53669	2.68809	2.85238	3.09929	3.34291	3.46147	3.65316	3.75462	3.76054	3.82905	4.082	4.52563	4.6231	4.77788	5.15263	6.4022	7.56532	9.27346	10.6854	12.731	14.01	15.0125	15.2852	15.4259	15.9846	16.4255	17.5947	18.2581	19.3828	20.5948	21.3432	23.7537	24.4746	24.9372	25.3748	25.4287	25.9796	25.9018	25.8189	26.7127	27.1905	26.471	26.9234	26.1622	25.2101	24.2472	23.4092
68	2.02338	2.18818	2.43158	2.59082	2.85919	3.06685	3.17483	3.46147	3.76559	3.74565	3.65168	3.85936	4.17854	4.56668	4.67847	4.93887	5.20502	5.65763	5.98114	8.4944	9.39646	11.5368	13.0643	14.6292	15.1357	15.5551	16.2588	16.0454	17.2308	18.1038	19.5515	20.2851	21.6538	23.3611	24.3635	24.2411	25.1652	24.8655	25.2852	25.6663	26.5346	27.1255	28.0758	27.4362	26.3888	25.6876	24.8066	24.2165	23.4909
69	1.93489	2.11882	2.40711	2.57785	2.79562	3.19093	3.39293	3.48594	3.66665	3.66323	3.68423	3.88058	4.25961	4.35679	4.67847	4.88015	4.84709	5.38532	5.92117	6.87078	8.95182	11.5059	13.2197	13.6705	14.6932	15.5766	16.3305	16.7627	17.7324	18.2405	18.775	20.0583	21.2336	23.06	24.2493	25.1878	24.6609	24.5436	25.3687	25.9694	26.4416	27.3502	27.7052	27.3223	26.7005	25.667	24.822	24.2489	23.9327
70	2.12742	2.25868	2.43657	2.51624	2.73749	3.00089	3.31947	3.39567	3.47163	3.46147	3.58203	3.86264	4.12885	4.44346	4.71132	4.79754	5.07614	6.29445	6.41565	7.44035	9.03547	11.0029	12.307	12.267	14.1924	15.1433	15.8623	16.7097	17.7428	18.2309	18.4308	20.0936	20.5244	21.6864	22.7007	23.4546	23.8716	24.7204	25.5697	24.9551	25.6746	26.7712	27.6479	27.9463	27.1384	26.7344	25.6725	24.39	24.2173
71	2.17496	2.29797	2.44712	2.51123	2.77682	3.01737	3.18673	3.25717	3.39567	3.39775	3.46197	3.78991	4.15808	4.49037	4.63977	4.77203	5.1268	5.63009	6.36342	7.19922	8.97541	10.4492	11.7247	12.0326	13.5031	14.7625	15.5381	16.4995	17.6781	17.9142	18.306	19.0872	19.7734	20.8837	21.3768	22.2773	22.9704	23.6029	24.7792	25.4838	25.9377	26.886	27.0979	27.2282	26.8565	26.2816	25.4665	24.4179	24.1656
72	2.13448	2.31605	2.39068	2.50868	2.60619	2.90503	3.06355	3.09394	3.37862	3.6147	3.65428	3.97009	4.16445	4.26271	4.54128	4.73309	5.00863	5.57721	6.34252	6.91969	8.18076	8.70275	11.2791	11.4909	13.9109	14.8451	15.7597	16.5609	17.2377	17.5972	17.9437	18.6664	19.6075	20.724	21.4966	22.1122	22.0873	23.1956	24.7273	24.1706	25.495	25.7028	26.3635	26.6173	26.4964	26.7197	25.1941	24.6089	24.1541
73	2.26285	2.29441	2.40635	2.5104	2.5992	2.89323	3.05187	3.11572	3.32227	3.6624	3.74901	4.00531	4.16693	4.36095	4.35637	4.69458	4.91661	5.95869	6.24743	6.87615	8.39014	9.88377	12.0279	12.9101	14.2848	15.1975	16.1358	16.5108	17.3749	17.4378	17.4311	18.2545	19.0308	20.4352	21.3449	22.6398	23.2842	23.9572	24.3686	24.8537	24.568	24.8391	26.0002	26.5668	26.8543	26.1765	25.4856	25.0861	24.5362
74	2.23447	2.26638	2.31084	2.39278	2.52786	2.70893	2.90886	3.0574	3.22022	3.40258	3.61665	3.87871	4.03429	4.15033	4.43636	4.6224	4.9817	5.37546	5.84052	6.55297	7.6991	9.06263	10.7212	12.3045	14.2175	15.3666	16.1019	16.3255	17.0304	17.233	17.6078	18.3261	18.9646	20.548	21.234	22.1094	23.6231	22.9084	24.0398	24.8275	24.5825	24.9596	25.9793	26.6261	26.8454	26.1344	25.9554	25.4624	25.0612
75	2.18471	2.33135	2.37841	2.54185	2.59901	2.52815	2.7713	2.99762	3.20135	3.37862	3.60699	3.7151	4.01859	4.17846	4.44712	4.5402	4.95354	5.27975	5.52677	5.81235	8.03204	10.1662	11.6753	12.5895	14.0804	14.697	15.4918	16.3544	16.8937	17.2359	17.7136	18.1177	18.7456	19.6206	20.6205	21.8634	22.542	23.0003	23.4768	24.7056	24.8603	25.4471	26.0321	27.3508	27.6981	26.8614	27.184	26.5939	25.3837
76	2.2439	2.33179	2.33966	2.59146	2.52512	2.5377	2.73341	2.90604	3.03728	3.3422	3.57539	3.90017	4.07487	4.23607	4.41575	4.70369	4.98918	5.17764	5.40126	5.70875	7.85393	9.82399	12.2723	12.5585	13.0516	14.5917	15.422	16.2177	16.7994	17.1725	17.5465	18.0255	18.4955	19.4262	20.1164	21.0535	21.4341	21.7861	23.1293	23.4088	23.5913	24.8105	25.2086	26.3002	27.0121	25.7202	26.0017	25.8029	25.5775
77	2.14946	2.2439	2.33923	2.43196	2.45897	2.60581	2.81956	3.00355	3.11558	3.17024	3.52841	3.81707	4.12777	4.18135	4.25725	4.535	4.96039	5.11114	5.34467	5.48349	7.72226	9.57649	10.7484	11.8905	12.961	14.0487	15.1854	16.0928	16.5966	16.8624	17.1986	17.7336	18.4807	18.9162	19.2074	20.0161	20.5213	21.0045	21.8801	23.2312	23.5405	24.4216	25.2801	26.2705	26.2624	26.8052	26.4683	26.5709	25.8185
78	2.22049	2.22884	2.29512	2.37078	2.44689	2.5582	2.80746	2.93482	3.03421	3.17371	3.55539	3.76597	3.87832	4.10536	4.25279	4.36079	4.8271	4.9938	5.23977	5.4692	7.73019	10.0843	10.3062	11.0984	12.6688	14.0518	14.815	15.3839	16.5256	16.9954	17.3632	18.2063	18.6669	18.8925	19.3887	19.843	20.4603	20.5961	21.1903	22.9879	23.7758	23.8155	24.6244	25.6259	25.8374	25.8653	26.0946	26.162	25.8545
79	2.02274	2.27001	2.2567	2.30064	2.33315	2.50972	2.74326	2.91275	3.01099	3.16326	3.5248	3.69529	3.89856	4.25914	4.27728	4.51616	4.81639	5.06903	5.2495	5.80072	7.05373	8.21891	8.86402	11.7403	13.8273	13.9575	14.4317	15.5146	16.5218	16.7911	17.5919	18.1205	18.3666	18.9575	19.4942	19.7295	19.9332	20.3082	21.4106	23.0854	23.5372	23.3068	24.2247	24.8285	25.4682	25.6935	25.7651	26.1588	26.0124
80	2.1478	2.16365	2.24319	2.40676	2.43596	2.61288	2.81383	2.95124	3.00276	3.35974	3.44999	3.58696	3.67915	3.98582	4.24239	4.46321	4.78108	5.01337	5.28672	5.31755	5.8446	7.32837	8.52841	11.2038	13.4871	13.9808	14.7223	15.7329	16.2387	16.4125	16.9646	17.6214	17.8558	18.1599	18.945	19.3088	19.4855	20.1547	21.1339	21.8147	22.4696	23.6968	23.7896	25.141	25.0587	25.3873	25.2084	25.6929	25.2677
81	2.11187	1.96556	2.12638	2.33652	2.45362	2.51435	2.78392	2.91275	2.92831	3.06432	3.32235	3.51265	3.78909	4.02321	4.19268	4.4486	4.69366	5.03535	5.2881	5.34211	5.85004	6.86638	8.43555	10.6782	12.3748	13.6605	14.5232	15.5223	15.9485	16.518	16.7603	16.8882	17.4286	18.0447	18.1985	18.8503	18.9675	20.0652	20.8195	21.3745	22.1148	22.5129	23.222	24.1535	24.936	24.8777	25.0522	25.7966	25.5668
82	2.13667	2.16204	2.1383	2.37381	2.46065	2.59096	2.77682	2.90184	2.94173	3.00182	3.32587	3.47968	3.77688	3.91234	3.92987	4.42658	4.85675	4.97118	5.28672	5.56651	6.23167	7.05256	8.01657	10.0532	11.1994	13.5176	14.974	15.459	15.47	15.7492	16.0225	16.1086	16.9321	17.2743	17.8509	18.1217	18.9322	19.6821	20.3064	21.5932	22.19	23.1811	23.1791	23.0498	23.4412	24.1565	24.6056	25.4324	26.1047
83	2.14878	2.27219	2.27027	2.3211	2.46097	2.61802	2.70914	2.83337	2.78411	2.90083	3.20373	3.44106	3.60593	3.73295	3.97049	4.21971	4.60393	4.87077	5.0361	5.46239	6.18102	6.57806	7.00086	8.35694	9.19213	11.7172	13.5793	14.4992	15.1592	15.1827	15.2041	16.3018	17.2797	17.3227	17.6222	18.6641	19.0064	20.0024	20.6282	21.7326	22.1178	22.3338	22.1321	23.0633	23.438	24.4969	24.9022	25.4059	25.6752
84	2.05535	2.06504	2.17608	2.19726	2.3333	2.53435	2.62396	2.6742	2.77661	2.87244	3.19009	3.39626	3.46259	3.77871	3.729	3.95987	4.11586	4.41056	4.88927	5.50695	5.98715	6.97171	7.35606	7.66191	10.1989	11.8876	13.0448	13.9728	14.3403	14.4797	15.0336	16.4579	17.1244	16.9219	17.7276	19.0212	19.1759	20.0747	20.7322	20.8562	21.3	21.7223	21.0383	21.4548	22.2421	23.5909	24.0882	25.1754	25.5413
85	2.00721	2.00767	2.16807	2.16807	2.18097	2.37189	2.58609	2.59974	2.70835	2.97855	3.20745	3.41396	3.44465	3.65643	3.68423	3.82904	4.21604	4.26374	4.86065	5.03624	5.32405	5.86426	7.28126	9.48157	11.4231	11.7642	13.011	13.0675	13.3897	14.2174	15.4213	16.3439	16.8681	17.0505	17.6352	18.877	18.9091	20.1051	20.58	21.019	21.3452	21.5707	21.0703	20.9109	21.7097	22.5099	23.7476	23.8493	24.5407
86	1.92018	2.01992	1.99532	2.06098	2.09341	2.21907	2.40052	2.5552	2.66232	2.96187	3.21138	3.3822	3.40045	3.58532	3.68423	3.72839	3.91922	4.10756	4.45913	4.89315	5.25654	5.48854	6.10129	8.73616	8.78306	10.6653	12.0156	12.8053	13.279	13.6441	14.4724	15.197	16.2381	16.8608	17.2115	18.0825	19.0579	19.4215	20.3771	20.6488	21.3958	21.6334	20.8681	21.2885	21.3453	22.2933	23.2649	23.7158	24.1593
87	1.76224	1.86863	1.79425	1.81034	1.84212	2.05297	2.29052	2.5992	2.71778	2.9377	3.0213	3.19009	3.37576	3.68423	3.69381	3.91056	4.07526	4.13674	4.36692	4.82296	5.20998	5.46669	5.65654	7.05959	7.53594	9.97979	11.7379	13.1756	13.6065	13.5709	14.4196	14.7047	16.3773	16.3712	17.1655	17.9328	18.2732	19.146	19.7593	20.2957	20.2277	20.4391	20.3063	20.3419	21.5529	22.0151	22.4061	23.1923	22.9133
88	1.62335	1.70767	1.81817	1.84244	1.84212	2.16807	2.32581	2.56398	2.71946	2.90754	3.10374	3.21917	3.37358	3.57057	3.82078	3.78346	3.89228	4.13868	4.35899	4.60202	5.14582	5.40748	5.75729	6.52343	7.32646	8.3611	10.7619	10.7448	13.1196	13.208	13.8946	14.1615	15.4093	16.4979	17.4713	17.8507	17.7164	18.7906	19.0806	19.8296	20.204	20.0999	20.0475	20.3602	20.6034	21.1352	21.506	22.3507	22.6919
89	1.64856	1.60149	1.76074	1.84212	1.94073	2.24581	2.45402	2.71659	2.71778	2.75704	2.87593	3.19009	3.29588	3.41583	3.58891	3.78738	3.84464	4.02194	4.22532	4.50767	5.03732	5.10722	5.3114	5.94542	6.77506	7.43203	9.36327	11.3169	12.616	13.3581	13.6044	13.929	14.997	15.6809	16.9558	17.5318	17.8235	18.1831	18.8483	19.4041	19.8751	19.6029	19.7177	19.8667	20.2805	20.6137	21.0813	21.3904	21.2344
90	1.48665	1.40602	1.58115	1.75168	1.857	2.03052	2.34623	2.47705	2.64047	2.71778	2.79171	3.00311	3.22283	3.23879	3.55722	3.66097	3.65624	3.80231	3.90979	4.24204	4.70861	4.88818	5.22128	5.34675	6.66381	6.2282	7.68109	9.39846	9.38302	11.941	12.929	13.3586	13.938	14.9469	16.353	16.7134	16.9523	17.5062	18.0109	18.395	18.9772	19.1079	19.1688	19.3146	19.7149	20.3618	21.0634	20.75	20.604
91	1.61125	1.55349	1.61168	1.76224	1.87248	2.05855	2.34708	2.39522	2.55342	2.69152	2.71778	2.8274	3.00675	3.138	3.41583	3.56209	3.43629	3.61134	3.87782	4.14533	4.49242	4.91661	5.07073	5.12912	6.36717	6.77623	6.86652	8.05495	9.67292	10.1006	10.9441	12.7551	13.7467	14.3339	15.3926	15.7876	16.6854	17.1337	17.1355	17.4245	18.1295	18.1283	18.541	19.4068	19.3399	20.0594	21.0684	20.0647	20.1597
92	1.60149	1.57665	1.59504	1.81409	2.05131	2.16807	2.35274	2.47964	2.50649	2.66743	2.71778	2.72624	2.81299	2.90998	3.00785	3.05674	3.09734	3.38989	3.74474	3.92285	4.14589	4.45861	4.75884	5.38872	5.96181	6.37756	6.6583	7.74457	8.74077	8.58001	9.04976	10.6488	12.9364	12.3586	13.4283	14.8041	15.425	16.6657	16.5637	17.0024	17.9124	17.6911	17.7639	18.9861	19.6731	19.814	20.0133	20.5077	20.9322
93	1.76224	1.75301	1.70933	1.77279	1.87337	1.91966	2.16807	2.28441	2.25737	2.50972	2.69545	2.76144	2.78128	2.86665	2.90234	2.90234	3.06847	3.43744	3.78631	3.78423	4.09586	4.16337	4.59717	4.83986	6.11192	5.7774	5.67675	7.09185	6.17295	6.82638	7.61874	8.95776	10.7976	11.7717	12.8888	14.5023	14.8334	15.6743	16.5733	17.1864	17.0649	17.3658	18.2287	19.0566	19.7214	19.4441	19.9317	20.0543	20.5429
94	1.76224	1.76224	1.71882	1.76224	1.71615	1.79917	2.15459	2.16807	2.17452	2.58184	2.61709	2.75651	2.78674	2.91443	2.99493	3.07437	3.33748	3.63497	3.6479	3.76409	3.83473	4.17214	4.24948	4.55443	4.94551	5.29535	5.51112	5.74358	6.02838	6.2532	6.45489	6.89157	9.04274	11.1174	11.4784	13.131	14.1706	15.1163	15.2818	16.4981	16.4598	16.4589	17.3203	17.8703	18.9223	18.8248	18.5611	19.0137	19.4642
95	1.76224	1.70767	1.57643	1.69305	1.66164	1.79895	1.94086	2.07705	2.16807	2.49545	2.71778	2.62067	2.78674	2.81722	3.07954	3.26531	3.50066	3.55888	3.56516	3.60652	3.78426	4.02056	4.20574	4.63516	4.70675	5.0832	5.29535	5.39012	5.62874	5.76887	6.016	6.29117	8.54274	9.68546	10.7578	12.1366	13.2574	13.7782	14.1826	14.7345	15.2315	15.8637	16.1455	16.8088	17.3728	17.6979	17.8544	18.1159	18.3718
96	1.76224	1.67453	1.4996	1.59632	1.59687	1.78725	1.79809	1.88974	1.88181	2.19148	2.5156	2.53917	2.69976	2.78128	2.90714	3.11865	3.2886	3.52885	3.47814	3.54814	3.69009	4.07734	4.08524	4.3359	4.55443	4.67702	4.92103	5.10705	5.52134	5.62493	5.6276	5.84919	7.93593	8.24214	8.54331	9.57181	12.4928	12.3791	13.583	13.3617	14.0109	15.4465	15.8467	15.6821	16.584	16.8592	16.9444	17.3194	16.9118
97	1.76224	1.57474	1.49798	1.33747	1.59488	1.73711	1.65309	1.75033	1.93199	2.19257	2.32485	2.40266	2.59082	2.73742	2.84989	3.11269	3.27271	3.34076	3.3175	3.41976	3.67773	3.90614	3.93499	4.0344	4.28424	4.48818	4.75232	5.16586	5.14582	5.4691	5.61597	5.67817	6.99775	7.95625	8.11718	9.33276	9.17429	11.0954	12.2615	12.3358	13.4641	14.5635	15.1646	15.1526	15.9868	15.9948	16.1394	15.9397	15.7412
98	1.49777	1.54225	1.28946	1.22828	1.49954	1.5956	1.51291	1.63719	1.88785	2.03807	2.22782	2.22807	2.45904	2.45904	2.74849	2.97434	3.10311	3.2471	3.14349	3.40113	3.55991	3.70179	3.87071	4.00211	4.06388	4.34959	4.58114	4.74574	5.13726	5.30247	5.33863	5.62552	6.03317	6.54668	6.66434	7.46587	8.38737	10.5545	10.2425	12.8075	13.3142	13.7158	13.7358	14.3306	14.86	15.4654	15.4835	15.5288	15.4421
99	1.38121	1.40987	1.2561	1.21313	1.30329	1.33818	1.44658	1.55998	1.64044	1.94952	2.16807	2.21673	2.42401	2.50045	2.57584	2.61261	2.78128	2.8428	2.88763	3.41698	3.49369	3.70098	3.70244	3.88936	3.96203	4.21851	4.51425	4.88193	5.15814	5.24314	5.30942	5.51513	5.97343	6.09553	6.60567	7.57281	7.95179	8.53572	8.47487	11.6992	12.445	12.9376	12.9459	13.0982	13.1003	13.8042	14.8439	14.9176	14.2567
100	1.28254	1.32803	1.30527	1.22386	1.28757	1.40121	1.59504	1.59504	1.64334	1.9587	2.1865	2.22463	2.25819	2.39052	2.51094	2.5104	2.67863	2.75922	2.90028	3.04208	3.31945	3.53112	3.64607	3.70378	3.7994	3.96589	4.23191	4.55814	4.85231	4.78407	5.08167	5.21397	5.59386	5.81807	5.78903	6.02286	6.17814	6.52803	8.26004	9.64342	11.5291	12.1691	11.1375	11.539	12.5871	13.175	13.5702	13.9405	13.4932
101	1.05692	1.25669	1.40083	1.22365	1.28631	1.31272	1.46639	1.51539	1.64524	1.95895	1.9592	2.24245	2.25688	2.44233	2.51094	2.35761	2.51213	2.54031	2.78674	3.15385	3.22283	3.32821	3.43325	3.62163	3.72276	3.79809	4.21806	4.24622	4.44303	4.50599	4.85041	5.0139	5.12305	5.37781	5.64411	5.73498	5.89388	5.9419	6.2046	7.29223	7.81586	8.96073	8.89296	8.8601	9.83502	12.0245	12.5761	12.5886	11.2018
102	0.807116	1.14609	1.2561	1.21071	1.18068	1.25181	1.40418	1.49404	1.59504	1.7093	1.80346	2.11935	2.25688	2.25955	2.47376	2.4235	2.43016	2.60327	2.68063	2.91224	3.11409	3.36173	3.4017	3.43276	3.42729	3.70209	4.07472	4.10353	4.21834	4.2891	4.49773	4.56329	4.74952	5.17255	5.45123	5.3362	5.65854	5.8849	6.08118	6.68302	7.99445	7.89263	7.12148	8.08299	8.4729	9.67103	9.87174	11.0302	10.4626
103	0.97118	1.1389	1.25061	1.22386	1.13647	1.29056	1.39721	1.50616	1.59504	1.68061	1.62892	1.8828	2.15147	2.25778	2.25782	2.26099	2.37575	2.53475	2.71778	2.86146	2.96965	3.05671	3.30535	3.40591	3.40739	3.42424	3.87871	3.74724	3.93974	4.12597	4.44349	4.47769	4.65344	4.70375	4.98281	5.28781	5.39138	5.66247	5.84555	5.73697	7.24437	6.9435	6.61731	6.85567	7.36264	7.85865	9.6278	10.4562	10.1994
104	1.0751	1.39332	1.49968	1.16839	1.32101	1.17715	1.32023	1.32168	1.44596	1.56863	1.7531	2.00657	2.11398	2.14542	2.25688	2.25783	2.27804	2.61561	2.88174	2.7456	2.96753	3.20218	3.18539	3.38049	3.16563	3.43022	3.51226	3.59996	3.72934	3.94697	4.18323	4.45441	4.55443	4.62793	4.66491	4.82075	5.09077	5.44862	5.49041	5.49763	5.86067	6.4944	6.39469	6.66667	6.5138	6.81916	8.56492	9.63019	9.48742
105	1.27982	1.4214	1.32168	1.32168	1.34452	1.08288	1.0179	1.37022	1.48021	1.4988	1.65752	1.83901	1.94928	1.97667	2.0032	2.14316	2.25885	2.66172	2.77746	2.71875	2.78674	3.04442	3.17454	3.08478	3.19063	3.30254	3.48883	3.59018	3.63281	3.74528	3.8646	4.03488	4.47558	4.4651	4.44009	4.76628	5.12031	5.30211	5.54768	5.46689	5.65946	5.78951	5.89514	5.95428	6.02222	6.03117	6.27804	7.30497	8.08519
106	1.41129	1.42708	1.37075	1.37508	1.39131	1.08588	1.14583	1.48739	1.43529	1.4988	1.49929	1.68476	1.75609	1.76621	1.90387	1.98924	2.25688	2.59077	2.54536	2.66517	2.6255	2.70834	2.87563	3.14024	3.08804	3.19114	3.28071	3.51415	3.59897	3.72691	3.7646	3.81843	4.26445	4.2104	4.4372	4.68795	4.84467	5.00141	5.28724	5.29766	5.34827	5.35059	5.39807	5.59145	5.59488	5.79224	5.84717	6.3561	6.70286
107	1.3956	1.35857	1.32168	1.33866	1.43902	1.40602	1.17668	1.24721	1.21129	1.348	1.49999	1.65537	1.74396	1.7531	1.69629	1.79893	2.115	2.17181	2.46508	2.53099	2.51174	2.70107	2.69799	2.69955	3.02799	2.83812	3.10742	3.40994	3.69331	3.71437	3.7919	3.89748	3.99514	3.96344	4.05426	4.26001	4.67152	4.68774	4.88587	5.28672	5.30216	5.1719	5.19962	5.28601	5.49778	5.49715	5.54298	5.83991	5.69292
108	1.39064	1.40602	1.31736	1.35022	1.15763	1.40602	1.05369	1.17262	1.28459	1.15355	1.32168	1.59157	1.7212	1.77759	1.61283	1.69418	1.87723	2.05953	2.23016	2.14133	2.27722	2.54566	2.57024	2.69868	2.72892	2.72929	3.01007	3.09351	3.43465	3.69609	3.79776	3.91896	3.90169	3.84007	3.8644	4.11383	4.33124	4.4051	4.59464	4.93756	4.87715	4.85441	4.99017	5.15312	5.15227	5.11542	5.21396	5.31868	5.25861
109	1.25561	1.28993	1.08131	1.16788	1.1267	1.02904	0.968771	1.07469	1.1279	1.15376	1.34053	1.42842	1.59209	1.5921	1.58569	1.59504	1.68916	1.95376	2.04108	1.93506	2.14937	2.36906	2.6125	2.5104	2.67973	2.68864	2.81334	3.0095	3.35606	3.59166	3.78015	3.85936	3.8712	3.92887	3.86233	3.91349	4.23328	4.37347	4.14485	4.17228	4.45497	4.70125	4.6751	4.88697	4.85414	4.93683	5.10192	4.94922	5.06461
110	0.730795	1.02453	0.902949	1.05858	1.09228	1.12133	1.20073	1.11683	1.25544	1.32168	1.31744	1.4249	1.5444	1.53674	1.52845	1.58165	1.63563	1.82657	1.87337	1.87337	1.90778	2.24792	2.44564	2.49984	2.42134	2.7091	2.81799	2.99164	3.29679	3.44613	3.57791	3.66464	3.75301	3.7489	3.83704	3.96898	4.19524	4.10475	3.93318	4.08709	4.12249	4.24138	4.51003	4.61569	4.641	4.72702	4.78123	4.85459	4.94162
111	0.15769	0.677634	0.736605	0.559422	0.794694	1.12177	1.22158	1.35385	1.29935	1.26	1.26635	1.27233	1.39833	1.39687	1.4248	1.52582	1.58937	1.69625	1.71936	1.76224	1.86236	1.92529	2.13499	2.27722	2.27722	2.65925	2.78128	2.86567	3.01005	3.17057	3.16451	3.42698	3.58968	3.57456	3.70258	3.76612	4.00011	3.85875	3.84084	3.98418	4.0156	4.11242	4.27598	4.34791	4.43589	4.55967	4.77006	4.71735	4.92982
112	0.251683	0.688172	0.43338	0.740953	1.05708	1.06766	1.28162	1.35889	1.35889	1.32217	1.27703	1.32168	1.32236	1.40274	1.40602	1.42438	1.42102	1.46247	1.42327	1.57663	1.69146	1.87337	1.90696	2.18167	2.18097	2.27722	2.76013	2.90234	2.87303	2.95611	3.00501	3.35475	3.42029	3.33113	3.59459	3.59593	3.76367	3.7665	3.87871	3.83848	3.87445	3.99053	4.15725	4.28941	4.1754	4.12181	4.29711	4.44076	4.79387
113	0.151179	0.212811	0.630209	1.03591	1.07653	1.10488	1.28682	1.35889	1.40553	1.38221	1.32236	1.17343	1.17213	1.00583	1.34085	1.34892	1.32191	1.32168	1.44946	1.49722	1.70953	1.76224	1.87337	2.10683	2.13653	2.39692	2.64744	2.78043	2.78881	2.78235	2.9271	3.18792	3.16192	3.23058	3.27424	3.18354	3.5016	3.4232	3.59422	3.68488	3.72814	3.92545	3.75513	3.82764	4.03716	3.98476	4.24663	4.22846	4.36952
114	0.161452	0.293878	0.600073	0.784365	0.943026	0.943033	0.980072	1.2458	1.3063	1.26735	1.34053	1.16315	1.1799	1.28822	1.32168	1.32168	1.33357	1.12307	1.42215	1.50475	1.52594	1.66435	1.78881	1.79837	1.99543	2.33265	2.62763	2.69623	2.67824	2.66454	2.85246	2.84643	2.90029	3.03614	2.96024	2.98395	3.18397	3.1899	3.38117	3.64306	3.63661	3.6495	3.64675	3.7355	3.93604	3.94866	4.17946	4.08343	4.16959
115	0.177351	0.396451	0.163767	0.23193	0.795079	1.06834	1.16788	1.13108	1.16788	1.13867	1.17629	1.09959	1.13332	1.17006	1.21399	1.34109	1.32693	1.32227	1.47441	1.59504	1.73534	1.5915	1.68051	1.70966	1.75377	2.06091	2.32013	2.31232	2.42329	2.43166	2.7075	2.70885	2.5032	2.56156	2.5104	2.60763	2.89397	2.81603	3.02228	3.23492	3.30719	3.20275	3.50364	3.76435	3.86206	3.76457	3.76996	3.83901	3.86548
116	0.0100062	0.0640297	0.229227	0.265635	0.677252	0.915711	1.07544	1.0743	1.18466	1.06829	0.811401	0.769677	0.79426	1.03336	1.08796	1.32265	1.39108	1.39064	1.59047	1.7775	1.77363	1.76224	1.70074	1.65086	1.79622	1.84942	1.92798	1.96387	2.09472	2.35019	2.39554	2.24426	2.27027	2.29682	2.33954	2.55707	2.68742	2.71778	2.72451	2.89433	2.81016	2.96112	3.11847	3.50364	3.36107	3.44002	3.50364	3.52904	3.6901
117	0.0791242	0.0491399	0.0761717	0.119656	0.744375	0.866871	1.10924	1.14729	1.06834	1.05583	0.964965	0.76761	0.459041	0.550511	1.11728	1.39086	1.42438	1.42327	1.69625	1.75736	1.76224	1.87337	1.72156	1.72613	1.70236	1.8065	1.85114	1.8719	2.06128	2.11741	1.95888	1.95955	1.96609	2.13896	2.24647	2.47931	2.5104	2.50513	2.5104	2.5596	2.68691	2.60887	2.86748	3.07319	3.18812	3.29836	3.32659	3.2808	3.50364
118	0.184567	0.0131444	0.0714262	0.213724	0.639268	1.03598	1.14729	1.16788	1.25792	0.962846	1.21078	0.916715	0.845619	0.975458	1.32168	1.35976	1.5859	1.675	1.50475	1.72149	1.791	1.81785	1.76224	1.73068	1.68853	1.80788	1.80788	1.94305	2.038	2.04994	2.01563	1.9344	2.0103	2.13984	2.17303	2.30902	2.47318	2.45512	2.5104	2.54516	2.59662	2.56697	2.75046	3.02535	2.97496	3.13427	3.19567	3.25679	3.44101
119	0.389855	0.381103	0.410006	0.858636	0.735893	1.11529	1.12165	1.09069	1.21971	1.11529	1.30853	1.23298	1.2552	1.32168	1.30075	1.42438	1.60447	1.68931	1.62292	1.68845	1.87337	1.87337	1.77058	1.83043	1.756	1.87337	1.78155	1.9469	2.0897	1.99752	1.99939	2.09854	2.16551	2.18097	2.13597	2.20982	2.23753	2.18097	2.45261	2.4361	2.51093	2.35754	2.61468	2.77731	2.79596	3.03532	3.13206	3.26681	3.26401
[truncated: 71 more columns]
