# Supplementary material for: Unexpected long-term variations of Saturn’s ring current revealed by energetic neutral atom imaging
Source: Research Square preprint supplement (doi:10.21203/rs.3.rs-3271171/v1), 2023-09-18
Supplement: Supplementary file 13 [file 973a3901c5b100d4b6002b11.xlsx]

## Sheet: ff4
	0	1	2	3	4	5	6	7	8	9	10	11	12	13	14	15	16	17	18	19	20	21	22	23	24	25	26	27	28	29
0	0.445622	0.449557	0.468091	0.49367	0.527905	0.551429	0.565224	0.567267	0.578704	0.596264	0.602984	0.612393	0.610612	0.602715	0.587697	0.568231	0.562403	0.548623	0.535343	0.523734	0.485667	0.471169	0.459133	0.441198	0.426212	0.409925	0.399269	0.421614	0.40741	0.392249
1	0.425348	0.435652	0.446757	0.458886	0.484587	0.521678	0.537108	0.561956	0.565335	0.56989	0.582711	0.588132	0.585526	0.570048	0.559112	0.570297	0.560207	0.537824	0.531454	0.517977	0.487806	0.472423	0.45995	0.432134	0.419402	0.416458	0.417287	0.394073	0.392032	0.371059
2	0.428746	0.439081	0.457131	0.476123	0.503161	0.528002	0.551705	0.575041	0.582491	0.577938	0.563339	0.583645	0.585584	0.586489	0.57757	0.57507	0.561304	0.552539	0.528095	0.494497	0.495786	0.47392	0.460041	0.464534	0.417475	0.393873	0.376628	0.368661	0.339949	0.333814
3	0.441702	0.436444	0.459778	0.499569	0.500578	0.529966	0.563588	0.564692	0.567667	0.585571	0.606199	0.606199	0.603246	0.580396	0.562954	0.570702	0.55686	0.544788	0.529428	0.520834	0.494111	0.483611	0.47691	0.426154	0.419497	0.400296	0.360626	0.347445	0.340038	0.324334
4	0.437955	0.449346	0.449346	0.47946	0.507341	0.529291	0.537216	0.541698	0.562497	0.583938	0.599116	0.578747	0.584015	0.552727	0.552727	0.541551	0.544587	0.537942	0.509746	0.500997	0.47099	0.457668	0.415796	0.384289	0.367651	0.363631	0.359135	0.374158	0.339651	0.313616
5	0.428073	0.432713	0.457771	0.495662	0.504439	0.504439	0.543197	0.555251	0.575259	0.570775	0.570638	0.576023	0.583355	0.583355	0.576903	0.565606	0.526534	0.527844	0.497463	0.496825	0.479597	0.481558	0.44263	0.411795	0.407411	0.392823	0.372029	0.352949	0.338684	0.326464
6	0.428073	0.439275	0.44556	0.476212	0.527173	0.547141	0.544925	0.55699	0.578767	0.568845	0.569974	0.573151	0.581231	0.56654	0.56997	0.569477	0.554667	0.554667	0.51288	0.486273	0.464135	0.435674	0.435674	0.41939	0.406379	0.382936	0.367755	0.367755	0.328009	0.295731
7	0.440519	0.444592	0.475689	0.478278	0.524163	0.574261	0.574261	0.567588	0.577221	0.58232	0.60107	0.621206	0.61037	0.603685	0.599817	0.561442	0.546045	0.529222	0.529222	0.49482	0.460536	0.420629	0.427481	0.391302	0.381712	0.365696	0.356136	0.350859	0.310141	0.281705
8	0.432581	0.462843	0.475689	0.506634	0.54019	0.572973	0.572973	0.586299	0.586223	0.598648	0.614669	0.600889	0.615994	0.6134	0.594019	0.581138	0.547478	0.51034	0.51034	0.486469	0.444559	0.444585	0.412943	0.393223	0.361251	0.32564	0.280391	0.266667	0.24323	0.237
9	0.456627	0.456746	0.490322	0.513398	0.559692	0.582664	0.595746	0.607998	0.608471	0.622184	0.633188	0.622177	0.622646	0.617755	0.579774	0.576105	0.551016	0.551016	0.529513	0.493947	0.478574	0.420891	0.420891	0.390571	0.359113	0.342604	0.305249	0.305249	0.264157	0.201262
10	0.456627	0.469708	0.504199	0.530721	0.568301	0.568301	0.599448	0.61299	0.602912	0.63664	0.63497	0.634854	0.613474	0.613474	0.598558	0.609368	0.58805	0.562308	0.513223	0.460317	0.441559	0.431009	0.403968	0.373764	0.346953	0.333421	0.321231	0.264849	0.240123	0.193726
11	0.482032	0.502309	0.502309	0.531732	0.54864	0.609033	0.613806	0.635278	0.647182	0.659956	0.671307	0.657512	0.65264	0.642518	0.642518	0.610262	0.588223	0.579274	0.514147	0.506534	0.457993	0.432063	0.422789	0.401913	0.369742	0.355262	0.314709	0.26121	0.2272	0.210305
12	0.474813	0.517549	0.534072	0.546613	0.578155	0.617971	0.64633	0.669725	0.694068	0.694962	0.682778	0.682778	0.696064	0.658743	0.635306	0.613314	0.586577	0.571671	0.539981	0.506333	0.49193	0.472462	0.454634	0.391007	0.349559	0.335657	0.318105	0.269785	0.25651	0.193819
13	0.499255	0.524856	0.538896	0.561579	0.6059	0.640074	0.660243	0.697645	0.713105	0.720727	0.721716	0.706415	0.706463	0.656536	0.637961	0.625519	0.614225	0.562174	0.544598	0.477663	0.475704	0.463945	0.434616	0.412013	0.373204	0.343804	0.289695	0.267645	0.22832	0.219491
14	0.497389	0.527927	0.556947	0.590507	0.625736	0.647066	0.676865	0.699123	0.710355	0.728921	0.72336	0.712497	0.709433	0.6994	0.668591	0.663373	0.62544	0.582945	0.566977	0.530075	0.47736	0.463911	0.452748	0.430338	0.415202	0.382691	0.323906	0.299436	0.234558	0.217111
15	0.534517	0.563852	0.599149	0.627285	0.65	0.690442	0.708428	0.727064	0.746797	0.752184	0.739748	0.719696	0.721412	0.68375	0.665101	0.624181	0.587481	0.559275	0.534385	0.487998	0.468621	0.436037	0.414113	0.381495	0.354691	0.328123	0.29701	0.283113	0.229025	0.197954
16	0.556707	0.578647	0.625938	0.656882	0.676984	0.686195	0.701173	0.729096	0.756703	0.77862	0.76012	0.745258	0.753415	0.730346	0.701908	0.654745	0.594215	0.570133	0.536964	0.510038	0.471687	0.453752	0.430118	0.412941	0.377205	0.355669	0.328068	0.304264	0.274716	0.241833
17	0.583357	0.615225	0.639495	0.66463	0.695488	0.745044	0.775858	0.799493	0.803746	0.794648	0.783934	0.776658	0.751591	0.713125	0.685085	0.649918	0.620118	0.587564	0.547727	0.502735	0.463087	0.439136	0.405938	0.388056	0.358487	0.327095	0.307866	0.282848	0.263676	0.211174
18	0.608017	0.624064	0.665621	0.701611	0.742182	0.777424	0.805391	0.829476	0.817343	0.822738	0.816627	0.816627	0.791858	0.762774	0.724819	0.683959	0.638223	0.596137	0.556018	0.512033	0.475843	0.464218	0.433131	0.389549	0.366041	0.339112	0.310409	0.275842	0.241642	0.21479
19	0.611478	0.653279	0.653279	0.722677	0.736638	0.793606	0.825248	0.825666	0.8363	0.849038	0.829088	0.798286	0.749253	0.749095	0.749095	0.702199	0.649239	0.624202	0.580039	0.529548	0.49333	0.473064	0.422838	0.383596	0.353794	0.329353	0.308811	0.303153	0.261152	0.207157
20	0.597089	0.665791	0.69136	0.746929	0.777569	0.821213	0.839557	0.831545	0.849132	0.855153	0.827938	0.804917	0.77065	0.769815	0.730664	0.689887	0.658401	0.614102	0.576541	0.517123	0.517123	0.495707	0.460556	0.384168	0.359879	0.331958	0.305161	0.256704	0.256704	0.210509
21	0.648433	0.69025	0.73921	0.763156	0.808621	0.837058	0.845148	0.86238	0.844697	0.855896	0.858826	0.85458	0.828856	0.792059	0.737114	0.689107	0.643682	0.643682	0.586709	0.534626	0.500995	0.452445	0.452445	0.413147	0.380907	0.354825	0.313483	0.313483	0.28037	0.224209
22	0.648253	0.718393	0.746597	0.756718	0.824223	0.847108	0.847108	0.876984	0.889572	0.857643	0.870049	0.82191	0.794397	0.773143	0.77053	0.737541	0.6739	0.622389	0.622389	0.535666	0.491136	0.461958	0.450172	0.417776	0.406728	0.351937	0.346496	0.309618	0.269844	0.262575
23	0.677552	0.727112	0.746597	0.775935	0.83875	0.863395	0.863395	0.90701	0.914469	0.901802	0.8799	0.821522	0.806186	0.768032	0.757152	0.733942	0.661295	0.593861	0.593861	0.531156	0.476744	0.451407	0.42611	0.405531	0.393565	0.345459	0.327604	0.298068	0.241132	0.242056
24	0.688784	0.716195	0.763424	0.809723	0.844131	0.875632	0.882901	0.89942	0.909627	0.911317	0.882734	0.868472	0.845883	0.79147	0.74071	0.698282	0.657068	0.657068	0.605265	0.530175	0.495967	0.451024	0.451024	0.423987	0.400918	0.367438	0.308904	0.308904	0.280478	0.255295
25	0.688784	0.736329	0.797134	0.850604	0.874993	0.874993	0.908194	0.935106	0.905067	0.908904	0.887335	0.864886	0.812867	0.812867	0.764226	0.717065	0.661821	0.617372	0.568232	0.552747	0.52343	0.490499	0.438825	0.424268	0.3842	0.372221	0.325444	0.303261	0.285974	0.24797
26	0.731555	0.772638	0.772638	0.841984	0.886007	0.905549	0.928172	0.954465	0.957	0.921948	0.882314	0.874957	0.852644	0.776422	0.776422	0.726609	0.692282	0.651782	0.603226	0.572421	0.514869	0.48122	0.435906	0.402037	0.381688	0.38227	0.352524	0.30983	0.293714	0.275535
27	0.716756	0.773795	0.811913	0.862674	0.880546	0.916978	0.921393	0.954072	0.940066	0.92318	0.902141	0.902141	0.871632	0.813787	0.777228	0.722043	0.691375	0.660751	0.62206	0.570204	0.510899	0.465227	0.443633	0.404167	0.38607	0.357126	0.336559	0.325392	0.308972	0.27586
28	0.722711	0.742272	0.779577	0.849296	0.90377	0.912405	0.940021	0.961266	0.956783	0.963291	0.920331	0.887963	0.861546	0.809408	0.780883	0.728434	0.687031	0.627941	0.587675	0.540908	0.514319	0.480545	0.450683	0.412104	0.380634	0.353295	0.336282	0.308672	0.292502	0.275086
29	0.710909	0.742644	0.800656	0.861337	0.887296	0.932693	0.958922	0.972709	0.963088	0.960464	0.934865	0.915509	0.886406	0.83043	0.782647	0.759988	0.718032	0.674288	0.645756	0.580527	0.52822	0.50214	0.476932	0.432615	0.400583	0.365486	0.348414	0.321378	0.307796	0.279761
30	0.723066	0.777029	0.818536	0.852294	0.910107	0.941603	0.959982	0.968424	0.942721	0.945936	0.930648	0.909485	0.873547	0.838632	0.807646	0.763211	0.721358	0.6846	0.643075	0.585909	0.562345	0.518013	0.478713	0.439742	0.411523	0.387754	0.381279	0.354921	0.329086	0.308326
31	0.747087	0.791464	0.827228	0.880827	0.917628	0.957416	0.974567	0.975738	0.96082	0.95893	0.941383	0.949556	0.91258	0.847996	0.810768	0.781995	0.73831	0.697044	0.652031	0.57638	0.533824	0.513609	0.475023	0.446269	0.434705	0.425217	0.387582	0.361366	0.359181	0.328251
32	0.746786	0.788408	0.841455	0.894715	0.941103	0.965148	0.967441	0.963835	0.931863	0.934432	0.920519	0.924701	0.882643	0.830717	0.798605	0.740693	0.722939	0.671829	0.623514	0.585011	0.554305	0.524552	0.497691	0.471934	0.44166	0.426927	0.376612	0.357206	0.347632	0.321063
33	0.769963	0.818768	0.869922	0.913117	0.947991	0.973921	0.960987	0.97944	0.954921	0.937586	0.911183	0.911183	0.878932	0.837655	0.799319	0.77937	0.751548	0.703081	0.678923	0.647304	0.563009	0.550669	0.53082	0.479482	0.456793	0.428151	0.407189	0.374726	0.360869	0.328445
34	0.789726	0.841734	0.841734	0.875851	0.934667	0.96459	0.971613	0.992271	0.977335	0.964743	0.949272	0.914572	0.881197	0.841586	0.841586	0.78017	0.744943	0.71098	0.677262	0.626111	0.570768	0.554855	0.508137	0.489063	0.4583	0.466738	0.437491	0.402147	0.382764	0.361162
35	0.736061	0.82401	0.858262	0.923106	0.955155	0.932553	0.972544	0.973139	0.983632	0.945543	0.943518	0.937167	0.898701	0.891902	0.828147	0.772746	0.733258	0.698523	0.672064	0.622741	0.622741	0.565717	0.530671	0.486691	0.476412	0.458923	0.444242	0.411519	0.411519	0.393476
36	0.761974	0.786836	0.867722	0.889788	0.94113	0.945584	0.971369	0.989945	0.964855	0.978173	0.940049	0.934177	0.906524	0.855175	0.826756	0.809027	0.760965	0.760965	0.687379	0.64316	0.613684	0.549234	0.549234	0.511249	0.491004	0.458325	0.426432	0.426432	0.383427	0.366889
37	0.745351	0.808546	0.838651	0.889868	0.927128	0.967764	0.967764	1	0.967589	0.96345	0.936091	0.925757	0.894057	0.83708	0.817004	0.784491	0.743881	0.711198	0.711198	0.665566	0.620407	0.576874	0.564566	0.52871	0.495108	0.450241	0.433355	0.409935	0.389442	0.373519
38	0.731356	0.804779	0.838651	0.879606	0.927979	0.968905	0.968905	0.96287	0.975297	0.956756	0.946374	0.896709	0.860014	0.833346	0.826144	0.798772	0.759037	0.721818	0.721818	0.677343	0.607198	0.578222	0.559843	0.53715	0.530152	0.486068	0.465952	0.455036	0.415545	0.402713
39	0.735487	0.759492	0.835546	0.860938	0.943079	0.954338	0.970545	0.967694	0.975869	0.955999	0.927789	0.918866	0.903507	0.866409	0.814524	0.790477	0.757481	0.757481	0.715758	0.662455	0.628753	0.601594	0.601594	0.552037	0.533569	0.503248	0.460975	0.460975	0.424288	0.415205
40	0.735487	0.771964	0.81941	0.864535	0.921447	0.921447	0.951552	0.960307	0.95667	0.939642	0.92695	0.910366	0.888506	0.888506	0.83355	0.809149	0.757104	0.733115	0.682251	0.657003	0.64054	0.637822	0.59235	0.604896	0.54708	0.532875	0.50301	0.484604	0.464456	0.456638
41	0.747765	0.792031	0.792031	0.847299	0.87725	0.904348	0.945674	0.955942	0.963036	0.938593	0.915062	0.895567	0.865145	0.846629	0.846629	0.800154	0.775445	0.735389	0.694832	0.690468	0.649733	0.629019	0.601585	0.579219	0.568658	0.534643	0.531324	0.508448	0.492539	0.482857
42	0.719456	0.764994	0.795697	0.856767	0.888911	0.901927	0.925822	0.929971	0.949945	0.936677	0.924798	0.924798	0.894754	0.838755	0.814452	0.805872	0.793921	0.745108	0.707534	0.709479	0.699233	0.662189	0.628446	0.610276	0.57592	0.542261	0.522343	0.508919	0.49422	0.480083
43	0.666758	0.723378	0.758579	0.793727	0.828894	0.874301	0.899985	0.924996	0.907942	0.90672	0.920704	0.883969	0.858717	0.845988	0.816642	0.803559	0.765091	0.744533	0.716531	0.688022	0.667071	0.637214	0.626911	0.589239	0.573648	0.569629	0.55092	0.522982	0.497625	0.488214
44	0.654783	0.704036	0.732179	0.776738	0.800351	0.834913	0.872768	0.87905	0.900151	0.888145	0.897958	0.883077	0.851069	0.845217	0.824825	0.775941	0.754859	0.715416	0.705197	0.691544	0.679628	0.655164	0.632746	0.613283	0.60248	0.582823	0.557503	0.530325	0.504056	0.498053
45	0.626231	0.671246	0.729066	0.750252	0.776374	0.819471	0.842298	0.862819	0.894173	0.906992	0.88859	0.865015	0.847493	0.842086	0.820274	0.796525	0.769408	0.740191	0.714244	0.680322	0.677048	0.65422	0.654313	0.633028	0.614957	0.592994	0.566516	0.537166	0.516124	0.490313
46	0.622453	0.665432	0.706623	0.742619	0.763931	0.798024	0.833649	0.847269	0.873304	0.877631	0.859822	0.863172	0.842777	0.812363	0.782091	0.774135	0.7692	0.746903	0.724674	0.702141	0.648491	0.645179	0.61848	0.582051	0.570143	0.557891	0.541995	0.520332	0.490569	0.477055
47	0.608379	0.648885	0.69	0.739637	0.770735	0.812459	0.850419	0.84735	0.843878	0.866264	0.832547	0.829708	0.809253	0.798854	0.759947	0.757293	0.741292	0.737175	0.710145	0.670437	0.648723	0.618395	0.603102	0.570282	0.558469	0.548226	0.521997	0.496162	0.482264	0.465318
48	0.606005	0.660631	0.686409	0.738661	0.774507	0.788438	0.81631	0.807751	0.817889	0.828977	0.820835	0.820835	0.816585	0.820051	0.79325	0.754164	0.748777	0.728884	0.689259	0.666914	0.648124	0.636805	0.613239	0.580614	0.549539	0.542584	0.522932	0.524092	0.513859	0.484007
49	0.594933	0.659088	0.659088	0.696304	0.718081	0.74427	0.768666	0.794626	0.809002	0.820168	0.816304	0.810978	0.808967	0.782017	0.782017	0.727954	0.735442	0.725125	0.683547	0.65408	0.63107	0.602783	0.566333	0.561208	0.551716	0.556593	0.532305	0.510555	0.473901	0.463407
50	0.554468	0.594968	0.669909	0.695836	0.713523	0.713523	0.738697	0.758101	0.786056	0.816254	0.797914	0.775997	0.787835	0.787835	0.766587	0.759254	0.724629	0.705729	0.664924	0.644625	0.638157	0.623272	0.590806	0.579955	0.537583	0.538974	0.514086	0.521451	0.528945	0.502501
51	0.554468	0.567582	0.598581	0.661641	0.692454	0.706305	0.712402	0.728662	0.766521	0.77889	0.790715	0.784776	0.789874	0.783346	0.764074	0.736013	0.695969	0.695969	0.651985	0.622995	0.606275	0.590116	0.590116	0.555899	0.568006	0.546911	0.530888	0.530888	0.477017	0.477654
52	0.537392	0.559272	0.577197	0.616873	0.658612	0.703564	0.703564	0.725167	0.746723	0.748905	0.755677	0.758621	0.763126	0.763674	0.743069	0.739325	0.695435	0.663452	0.663452	0.66783	0.626565	0.616003	0.606002	0.570199	0.553077	0.517717	0.509985	0.501132	0.496198	0.488942
53	0.524166	0.554218	0.577197	0.583196	0.631454	0.666898	0.666898	0.712674	0.730444	0.728045	0.739267	0.73166	0.730034	0.719115	0.714696	0.701234	0.682146	0.650906	0.650906	0.62833	0.632747	0.600401	0.598629	0.5838	0.574429	0.541327	0.525807	0.52219	0.512654	0.493232
54	0.505431	0.532024	0.549435	0.592858	0.647275	0.656234	0.66592	0.694946	0.704242	0.719562	0.725205	0.745884	0.719204	0.703644	0.683874	0.674755	0.643289	0.643289	0.636562	0.620551	0.603379	0.610421	0.610421	0.601378	0.591001	0.570755	0.55096	0.55096	0.522685	0.507567
55	0.486433	0.520398	0.53308	0.591374	0.581789	0.623472	0.63214	0.674212	0.680448	0.696723	0.691613	0.705921	0.682544	0.69025	0.676543	0.668351	0.662201	0.655162	0.62801	0.618128	0.618128	0.603089	0.585015	0.568305	0.553016	0.532391	0.530837	0.506797	0.506797	0.509057
56	0.499696	0.523011	0.523011	0.575968	0.580919	0.611129	0.627382	0.638742	0.650447	0.666759	0.684386	0.694118	0.701514	0.687056	0.687056	0.661172	0.655406	0.640281	0.630637	0.645053	0.586464	0.570882	0.570394	0.558052	0.535699	0.525436	0.507905	0.505006	0.497702	0.477168
57	0.486878	0.49849	0.523568	0.567731	0.569787	0.580833	0.615209	0.637756	0.631576	0.627034	0.670092	0.670092	0.685165	0.66601	0.648684	0.638576	0.61992	0.619058	0.616252	0.608436	0.54854	0.536947	0.526915	0.529661	0.519879	0.516058	0.514259	0.497141	0.479126	0.459081
58	0.465441	0.469116	0.500563	0.510652	0.521291	0.561742	0.582826	0.595461	0.612044	0.613488	0.625977	0.626939	0.629322	0.62627	0.615838	0.618398	0.623312	0.597483	0.580779	0.577227	0.572232	0.543482	0.512316	0.504838	0.504833	0.498759	0.477343	0.452706	0.437167	0.385046
59	0.451391	0.460478	0.482709	0.501726	0.527911	0.554191	0.566147	0.584313	0.58061	0.588692	0.614134	0.620241	0.605947	0.619297	0.623527	0.620767	0.619496	0.597521	0.56187	0.565309	0.524684	0.499296	0.500378	0.469701	0.458268	0.437678	0.423373	0.427331	0.427162	0.40784
