# Supplementary material for: Unexpected long-term variations of Saturn’s ring current revealed by energetic neutral atom imaging
Source: Research Square preprint supplement (doi:10.21203/rs.3.rs-3271171/v1), 2023-09-18
Supplement: Supplementary file 14 [file 9880598f19274961df13abc9.xlsx]

## Sheet: Period2_ENA density
	0	1	2	3	4	5	6	7	8	9	10	11	12	13	14	15	16	17	18	19	20	21	22	23	24	25	26	27	28	29	30	31	32	33	34	35	36	37	38	39	40	41	42	43	44	45	46	47	48
0	19.6917	18.6796	19.3625	19.8708	19.9773	20.4045	21.2897	21.6937	21.5147	22.1689	21.2918	21.0217	21.7246	21.6803	22.1133	22.1913	23.1561	22.6169	22.7983	22.9727	22.7634	22.8069	23.1244	22.7037	23.1317	22.9033	25.7128	24.479	25.4543	23.2318	22.9789	23.3913	23.708	24.3453	24.5119	24.7165	23.908	23.6255	25.8334	24.6746	24.4072	25.2971	25.6063	25.0832	24.7271	24.2598	21.9706	23.8063	22.3195
1	20.0256	20.0249	19.2543	19.6439	19.9648	20.535	21.0399	21.5628	22.1559	22.1957	22.3358	22.2625	21.5476	22.0896	22.2782	21.8405	22.9611	23.7392	22.7987	23.2038	23.4205	23.7473	23.48	23.3773	23.7034	23.9947	24.8212	25.84	25.7511	26.1157	25.0676	23.3669	23.7516	24.6357	25.3355	24.861	23.7626	23.877	25.6604	25.5486	25.8228	25.3836	25.9876	26.3803	25.71	24.8554	23.0478	22.8065	23.7279
2	19.8368	20.7223	20.2213	20.2842	20.2366	20.6876	21.227	22.1335	22.3683	22.379	22.3723	22.7718	23.1438	22.3878	22.3912	23.1587	22.7937	23.3716	23.9139	23.8687	24.2024	24.7241	24.9268	24.2873	24.3609	23.6331	24.3411	26.0349	26.1845	27.0379	26.3438	25.486	24.1752	25.7095	25.4989	25.6494	24.7364	23.6481	24.6864	27.2161	26.3023	26.3152	26.4905	26.7111	27.1164	26.8593	24.4458	23.9792	23.8945
3	19.3981	20.1912	21.3067	20.5287	20.6265	21.1035	21.2309	21.6522	22.4241	23.3526	22.7431	22.3722	23.303	24.1698	23.1096	23.0025	24.2069	23.2283	24.754	24.793	24.9498	25.1544	25.5484	25.3868	25.2467	24.6826	24.1001	25.0134	25.7508	27.1647	26.6559	27.0153	25.6696	25.6556	26.6506	27.0548	26.1797	25.1299	25.3791	26.3821	26.774	26.6692	27.2656	26.9546	27.5136	27.388	26.321	26.6493	25.4155
4	20.3255	20.2699	20.3274	21.2302	21.5477	21.5124	21.9652	21.7759	22.5997	23.1673	24.0143	23.6142	22.7066	22.8411	24.7158	25.0508	23.9863	24.7408	25.7051	25.2103	27.0172	27.6819	26.8151	25.2094	26.6075	25.46	25.752	25.49	25.5032	27.1483	28.3574	27.4163	26.6831	27.3214	26.3543	27.6977	27.312	26.8568	26.3005	25.788	27.0634	26.9438	27.9051	28.1005	27.4298	27.9069	27.5743	27.2435	25.912
5	20.3539	20.5229	21.8476	21.7718	21.4844	22.0186	21.9429	22.1923	22.0514	22.9058	23.9886	24.7321	24.3993	24.1365	23.7176	25.4426	25.5256	25.0783	26.6027	27.0244	26.6778	27.8566	28.5588	27.5855	26.3624	25.956	26.5102	26.0788	26.3399	27.068	28.274	29.1411	27.6605	27.3274	27.8943	27.9759	27.9849	27.7134	26.3678	27.3666	27.3493	28.8281	29.0203	28.827	28.2916	28.7648	28.4553	27.5256	28.3016
6	20.3684	20.8944	21.1707	21.9775	22.0874	22.3132	21.6446	22.1247	22.5466	22.8668	24.9008	25.3823	25.7292	25.2712	26.2326	25.4446	26.3909	27.2075	27.262	26.5694	27.7159	27.8601	29.2215	29.2542	27.8492	27.8657	26.8648	28.0602	27.432	28.4078	28.4112	29.6826	30.2739	28.2377	28.4347	28.439	29.3174	28.3771	27.9874	28.425	29.0475	28.7269	28.6592	29.6423	29.8036	29.1614	28.0733	28.8424	28.2173
7	20.4686	20.8778	21.0999	21.8694	22.3539	22.6812	22.7969	22.8848	22.7362	22.7343	22.9818	25.4265	26.332	25.9826	26.3173	27.0957	26.7964	26.5726	27.4096	28.4751	27.7207	28.6858	29.4438	29.9251	30.2525	28.9169	28.2065	28.3818	28.8104	29.1214	29.4087	29.9368	30.8466	29.7387	29.6817	28.8705	29.4442	29.8934	28.6287	28.5117	30.7358	29.3411	29.6424	29.7416	30.2892	30.0881	29.0151	29.219	28.9401
8	20.8571	21.1168	21.4386	22.2236	22.4669	22.5682	23.1231	23.8502	22.9828	23.226	22.6747	23.5345	25.8347	26.7066	26.2639	27.6544	27.8982	29.2837	27.8184	28.1718	28.3029	29.191	29.8445	31.5368	30.6356	30.2776	30.3467	29.5172	29.5163	30.7011	30.3958	30.8158	31.1536	30.3915	30.9097	30.3727	30.168	29.9671	30.2544	30.164	30.1759	30.8914	30.2566	30.1453	30.4732	31.1287	29.4158	31.1113	29.5664
9	21.2891	21.6853	21.6702	22.8465	23.1531	23.9628	23.6054	24.4068	24.7762	24.1191	23.6889	23.3171	25.8859	27.2556	26.8977	27.4745	28.3321	29.6369	29.9388	28.8574	28.6709	29.474	29.9365	31.1144	31.8984	31.753	31.1793	31.2676	31.2503	32.4832	31.4659	30.6386	31.913	31.2222	31.7098	31.3006	30.8016	31.4992	30.5228	31.4549	31.053	31.555	31.2914	32.4915	32.3466	31.0063	30.2222	30.7685	31.4549
10	21.6966	22.2296	22.2781	22.9148	23.4673	24.1558	24.3271	25.0593	25.036	26.0865	24.392	24.1775	24.8545	26.0822	27.558	27.7736	28.8238	29.0675	30.0042	29.9697	29.2362	30.1573	30.3595	31.6521	31.8472	32.4686	32.8603	32.5339	32.8207	32.7234	32.7971	31.4842	32.6998	33.1427	33.0025	32.3326	32.7616	32.1646	31.9458	32.0755	32.2391	32.7232	32.5253	33.3316	32.5712	31.5925	31.2139	31.0579	32.0777
11	22.7756	22.2899	22.7349	22.6776	24.5055	24.8778	25.2869	25.5258	25.8342	27.0988	26.5726	25.4867	25.9448	26.5737	27.3925	27.3522	28.9109	29.5718	29.8414	30.185	29.9115	30.5759	31.1042	31.6872	32.2857	33.3939	33.5494	33.6808	34.3013	34.2342	33.1752	33.8618	33.5124	34.2701	34.6816	34.165	33.4564	33.873	32.8588	32.87	33.5332	33.7826	34.531	34.0325	34.6263	33.9383	32.8737	31.9054	32.4163
12	23.1208	23.5935	23.911	23.719	23.4726	24.8276	25.783	26.5523	27.3165	27.46	27.0248	27.8704	26.7432	27.2795	27.7679	28.167	28.7673	30.0688	29.6475	30.3554	30.2109	31.0833	32.2631	32.2981	32.6652	33.2553	33.7806	34.2416	35.1083	35.6682	35.9196	35.0354	34.5054	34.095	35.655	35.2495	35.2091	35.2287	35.4027	34.7909	34.6277	35.4054	35.8762	36.471	35.2535	35.0776	34.6184	34.2045	33.3908
13	23.2758	24.1985	24.5808	24.2612	24.76	25.0245	25.7969	27.5667	27.6722	27.885	27.9904	28.9209	28.8009	27.6013	27.1351	28.0218	28.9791	30.2687	30.8848	30.4645	30.8659	31.4322	32.2677	33.1031	33.3765	34.4397	34.4555	34.7865	35.4334	36.7425	36.5341	36.935	36.0401	36.3086	36.4022	35.9766	35.7782	36.8839	36.6768	36.8117	35.8966	36.0471	37.4532	38.0087	38.2364	36.4744	36.8571	35.3464	35.2856
14	23.3604	23.5317	24.6415	25.5611	25.411	25.3178	25.6003	26.9444	27.7838	29.0079	29.6127	28.2136	29.427	29.7118	29.1306	28.2297	29.286	30.2184	31.1686	31.105	31.7163	32.7793	32.6326	33.5707	34.4244	34.9252	35.8163	35.3669	35.3739	37.1194	37.9428	37.3232	37.2308	37.8343	37.7968	37.4346	37.6879	37.0636	38.3919	39.0498	38.5138	37.308	38.4111	39.5827	38.6197	38.8196	37.9977	37.9789	37.6782
15	23.4059	23.9992	24.2374	26.4857	26.6583	26.8044	26.8774	27.1469	28.5099	28.3867	30.2156	29.2951	30.2871	30.2797	30.6898	29.5296	29.3726	29.7633	30.8352	30.9505	31.5426	32.182	33.6254	34.0709	34.6423	35.5933	35.9568	35.8966	36.0873	37.2478	38.6074	38.4659	38.7316	39.1731	38.8783	39.0137	37.8502	38.8497	38.5576	39.3796	40.7053	39.455	39.6594	39.5447	40.2792	39.2939	39.4922	40.1827	39.1453
16	23.4211	24.1564	25.1893	24.8423	26.8884	26.9361	27.0683	28.0396	28.6377	28.8304	29.837	30.1015	30.1382	30.9599	31.0747	31.3146	30.2521	29.611	30.6615	31.5863	31.8489	32.5932	32.8109	33.1947	35.3224	36.277	36.9537	36.53	36.6855	38.227	38.6417	38.8439	39.6487	39.7828	39.0519	39.8802	40.5582	39.8727	40.6588	40.0732	41.5536	41.2419	41.5709	42.1337	41.2267	39.9325	40.4203	40.4629	41.8716
17	23.5127	23.5806	24.5581	25.2043	27.0237	27.1305	27.3217	27.9876	28.5442	29.1082	29.5531	29.864	30.4889	31.1181	31.7907	32.2322	31.6843	30.8331	30.4327	31.0704	32.7121	32.8091	33.7296	34.1933	34.5047	36.628	37.7053	37.565	36.7063	38.6138	39.3553	39.3762	39.5091	40.402	40.8361	40.1794	40.9262	42.5704	42.6784	41.9216	43.2675	42.5178	42.1391	42.4427	43.6663	42.6718	41.729	41.4945	43.2245
18	23.6606	23.9815	24.8125	24.6087	25.9823	26.7309	27.6075	27.4905	27.927	29.5215	30.0415	29.9017	29.2543	31.1959	31.3305	32.3419	32.5272	31.9311	32.1962	32.2883	32.5432	33.5622	34.1069	34.5418	35.4852	36.2173	37.9801	38.3132	38.3563	38.9048	38.9997	39.7692	41.4493	42.16	42.3595	42.1335	41.9339	41.852	43.346	43.0829	44.7422	44.3789	44.83	43.7615	44.3495	44.8598	44.1216	42.9506	44.4348
19	24.8136	25.3875	24.4171	25.2705	25.291	25.3534	27.7032	28.2138	28.2141	28.4907	29.9359	30.2961	30.4926	30.0914	31.0873	32.1398	32.8493	33.6688	33.3396	32.8089	33.5392	34.9917	34.2965	34.7756	35.8824	36.4732	36.4195	38.9672	39.5265	39.1264	39.8509	40.9413	41.8764	42.1058	43.0401	42.6371	43.1125	43.561	43.8822	44.4293	44.427	45.5913	45.9649	43.8954	46.0881	46.4218	45.6137	44.7889	44.8754
20	24.1482	25.045	25.4717	25.7943	26.523	26.5179	26.1849	28.3243	28.9038	28.9493	29.5537	30.2173	31.1331	31.6974	31.1643	31.079	32.7187	32.7659	33.704	34.1956	33.8765	33.9228	35.8206	36.1364	35.8557	37.8272	38.3607	38.626	39.2345	40.2197	40.3028	41.235	41.8364	43.7912	44.0071	45.143	44.7721	44.3018	45.6735	45.913	45.6883	44.9535	46.9253	47.287	47.4618	47.621	48.5055	46.8951	47.7816
21	23.6716	25.0765	25.4211	26.3339	26.6119	26.8772	27.2678	28.0561	28.3259	29.1018	29.8256	30.0951	31.0074	31.5022	31.8752	31.0819	32.1167	32.7239	34.0676	34.3508	35.2154	35.7527	36.2109	36.8275	37.3823	38.8106	39.3515	39.5053	40.2844	40.9804	40.8849	41.3091	42.5681	44.0187	45.0752	46.4329	45.9948	46.8988	46.8458	46.971	47.8254	47.5745	47.7977	48.3072	48.8037	49.2572	49.8688	50.0959	49.6022
22	24.5486	24.8614	25.6126	26.1465	27.3316	27.4836	27.9019	28.6191	29.3598	29.9715	30.278	30.9996	30.8394	31.7651	31.9353	33.2058	32.3323	33.2486	33.6313	33.7305	35.0659	36.9177	37.1285	37.8573	38.3853	39.0787	40.1102	41.4255	41.8925	42.0056	41.2995	42.1269	42.7193	43.9493	44.8782	47.9203	48.7142	48.4886	49.1884	47.5797	49.6668	49.8604	50.7995	50.658	49.5801	51.4073	51.8544	52.5284	52.5586
23	24.0448	24.4293	25.3244	26.6578	26.8997	27.746	27.5632	29.1661	28.9887	30.0007	30.5538	31.17	31.6042	31.9826	32.0597	32.1561	32.3974	33.5901	34.5504	34.7388	35.3449	36.1744	38.0891	37.3933	38.9667	41.4153	40.901	41.5156	42.2765	42.8519	42.7359	43.2158	44.7027	45.544	46.0904	46.8411	48.5021	48.8138	49.5675	49.5335	49.8798	52.3828	53.051	51.6401	52.2164	53.0491	53.6187	53.5452	53.1861
24	24.0283	25.037	26.0452	26.1178	26.7422	27.854	28.1152	28.2268	29.1477	29.8761	30.0401	30.4139	31.0128	33.1347	32.5265	33.132	32.7745	33.1281	34.426	35.5817	36.232	36.6895	37.5961	38.3547	38.8235	40.1721	41.9032	42.7451	42.5189	43.8138	45.6841	44.3802	45.1293	47.622	47.0002	48.0985	49.0689	50.4568	50.662	50.684	51.5825	52.5003	52.434	52.9633	54.8832	54.2781	54.4989	54.9973	54.561
25	24.9772	25.0101	25.7256	26.8547	27.6819	28.8374	28.882	29.1518	29.3591	30.0685	31.2221	30.726	30.7667	31.4745	32.4672	33.599	33.4456	33.4807	33.4313	34.9386	36.6842	37.8666	38.7724	38.3641	39.0653	40.0787	40.8973	42.5183	43.8547	44.2503	45.8656	45.3477	46.8165	46.9	48.5792	50.4019	50.3676	51.8332	53.3087	52.7628	52.4044	53.9234	54.6756	54.9073	56.3791	57.4525	56.9216	55.9327	56.7146
26	24.1673	25.408	26.3484	26.444	28.4384	28.4386	28.7717	29.766	30.2708	30.581	30.4673	31.7273	31.017	31.6805	32.3015	33.5687	33.9011	33.8336	34.4957	35.2237	36.2888	37.6534	39.1933	39.4807	39.2532	40.7773	41.1741	42.8632	43.5492	43.2954	46.2887	46.9901	48.0091	48.1732	48.9704	50.6112	52.9907	53.6967	53.1999	54.5458	52.9498	54.2653	55.3227	57.1042	57.7301	58.9876	57.0895	57.3906	59.4546
27	25.7046	25.9237	26.2331	26.2351	28.0503	29.4916	29.433	28.5449	29.6382	30.668	31.5549	31.6186	32.4231	32.5373	32.0984	33.6502	33.9932	34.6195	34.8574	35.8015	36.6842	37.7305	38.0469	40.0114	40.7613	41.6008	42.7102	43.7949	44.5595	45.3424	45.5572	46.5015	48.2445	49.326	50.04	50.8452	52.9305	54.6461	54.2118	55.1391	55.3947	55.872	56.0714	57.0564	58.9111	59.4808	58.8095	58.3348	60.526
28	26.2902	26.647	27.0942	26.2826	26.769	29.0058	30.0842	30.0586	30.1468	30.8282	30.9187	31.6369	32.253	33.0049	33.1986	34.051	34.4556	34.9968	36.1632	37.3049	37.6897	39.5941	39.041	40.9135	41.7726	41.4913	44.1537	45.66	47.4258	47.0663	46.6116	47.7924	49.1015	50.5763	51.6814	52.4818	54.3674	55.2406	56.5291	56.5781	58.4852	57.6802	57.5207	57.4624	59.8768	59.4529	59.6105	60.6483	61.0565
29	26.7863	27.4759	28.3476	27.5764	27.9937	28.4143	29.4791	29.4853	30.5868	30.4269	30.8724	31.6213	32.3127	33.9429	33.8582	34.3398	34.7044	35.509	36.3878	36.8229	38.756	40.2828	41.6398	41.8797	43.4984	44.2013	43.7345	46.0084	49.6295	49.9318	49.2628	49.2661	49.4693	51.1722	53.3216	53.3798	53.5657	55.5987	57.47	56.5799	58.8813	59.2331	60.4005	60.954	60.507	61.6277	61.9114	61.1963	61.9959
30	27.3738	28.1257	29.0547	28.8327	29.4088	29.2203	28.6943	28.9181	30.0982	30.4634	30.4537	31.0145	31.9991	34.6443	35.2395	35.5305	36.2885	36.6505	37.682	39.3637	38.9293	40.3844	41.891	44.2726	45.3225	46.7811	47.7812	46.6796	49.7681	50.4008	51.0889	50.9044	51.5148	52.1515	53.1662	54.3433	55.3506	55.5196	57.5691	58.0269	58.8143	60.7366	61.6006	63.6834	63.3731	62.0139	63.1537	63.108	62.1863
31	26.5496	27.4694	28.7338	29.5257	29.8486	29.946	30.8666	30.1283	30.7665	30.6024	30.9987	31.8031	31.6843	33.9815	35.9165	36.8452	36.9553	37.6331	38.0362	39.2027	40.0318	40.4324	42.6139	43.4458	46.211	48.1914	49.293	49.1901	49.5579	52.0928	52.1117	52.3558	53.2512	53.8757	53.6588	55.7738	56.0393	55.9777	57.4712	59.3731	59.8345	60.6102	63.0336	62.8906	64.2406	64.5631	65.0287	64.4128	64.046
32	27.0258	27.1496	28.0685	29.5005	29.8518	30.1045	30.8214	31.7915	31.3431	31.333	32.2838	33.0551	33.3997	33.5336	34.0173	36.6845	37.8479	38.6847	39.2735	40.6232	41.719	42.3485	43.0404	44.8163	46.2183	48.196	50.6678	50.8314	50.7081	51.1155	53.7267	53.9853	53.928	54.4613	56.3478	56.5478	57.3397	57.9608	58.4487	60.3321	60.7487	62.5046	63.7396	65.5606	65.9502	66.1296	67.1966	66.9514	66.2605
33	27.3513	27.1638	27.4105	28.0735	28.7305	30.2916	30.9897	31.4865	32.3258	33.1613	32.9569	33.6412	33.59	33.8194	34.2585	35.4265	37.3595	38.7897	40.58	41.4591	43.539	43.761	43.9886	44.9552	46.9892	47.8428	49.6167	51.8608	51.8734	52.6972	52.6835	55.0669	55.8144	55.9023	56.6318	57.6545	60.1037	60.6345	60.7067	60.1757	62.1208	62.9639	65.7116	66.1019	68.0046	66.9675	67.1498	69.0607	69.8033
34	26.2156	27.2361	27.4802	28.2383	28.5017	30.1026	30.8492	32.102	32.6828	33.8323	33.5276	34.2264	34.6905	34.3793	34.2581	35.0387	36.2171	38.2143	39.863	41.7589	43.9502	45.1814	46.1303	46.1787	47.0909	48.3998	50.3918	52.1646	52.4121	55.1662	55.2937	55.3124	56.4908	55.8205	58.1575	58.8661	59.224	62.2934	62.6673	62.1916	62.5795	63.7592	65.2678	67.1929	67.5975	67.6631	68.2854	70.5202	70.5493
35	25.5044	26.4916	27.6614	28.5888	29.6966	30.2696	31.0729	31.7255	33.3995	33.9735	34.7283	34.9797	34.9765	35.2373	35.7271	36.288	37.3957	38.5215	40.268	42.1666	43.0103	44.6832	46.1504	47.3113	47.4311	48.6384	50.9763	53.407	54.0234	55.5987	56.4588	56.1493	56.8943	56.877	58.3458	58.4982	60.7003	62.3655	62.4477	62.7391	64.4526	65.2879	65.4158	67.1772	67.5946	68.3293	69.4818	70.8275	70.8842
36	25.4202	26.4111	26.7741	27.761	29.4628	30.4954	32.0368	32.4165	33.7335	34.6613	35.5369	36.325	36.3336	36.5693	36.6104	37.379	38.0648	39.3319	40.8989	41.1688	42.9567	45.8569	46.8771	47.3583	48.4997	51.238	50.455	53.4428	55.6872	56.386	57.4646	58.8586	59.1578	59.1722	59.2984	59.5104	61.3316	63.5299	63.617	65.3428	66.4318	66.935	66.6557	66.7766	67.7713	68.8364	70.3247	71.3445	70.3647
37	26.9077	27.2678	26.477	27.5936	28.87	29.8105	31.0899	32.2678	33.1911	34.4919	35.3176	36.8617	37.5178	37.9911	38.1142	39.3359	39.4686	40.5831	41.4586	42.0887	42.1344	44.7984	46.7918	47.4646	49.4953	50.7943	52.3546	53.3785	55.7964	56.6398	58.4321	58.9001	59.5473	60.5592	61.1946	62.0454	63.1146	64.6088	65.8862	65.9679	68.3174	69.0088	69.3864	69.6909	69.5877	71.0624	69.9616	71.7822	72.2388
38	27.6091	27.6085	28.6145	28.6817	29.2448	29.4425	29.3694	31.1135	32.0913	33.669	35.5605	36.372	37.7499	38.9463	39.8663	40.8657	41.7843	41.6341	42.101	42.1603	44.1487	45.4032	46.6826	48.1069	49.5191	50.6229	52.562	55.0234	55.5957	56.6642	58.5448	59.4383	59.9782	60.4487	61.3637	62.0817	63.9293	65.9567	67.7776	67.8565	68.8094	70.044	70.1938	69.6692	71.497	72.7891	72.809	72.2047	73.4438
39	27.8727	28.2243	28.7903	29.4115	29.5976	29.9421	30.4044	30.7177	31.5609	32.2075	33.2811	35.4332	35.7053	37.2527	39.2086	39.4831	42.1047	42.7958	42.5056	43.9337	43.8091	45.2855	46.2553	47.0315	50.0856	51.1783	53.3128	54.7061	56.2961	57.681	58.8786	60.2372	60.9522	62.0503	62.0631	62.1242	63.111	63.6398	66.6111	68.531	69.391	69.9078	70.3785	71.6413	72.879	72.6805	74.3572	75.4396	74.199
40	28.1947	28.6507	29.0743	29.4807	30.4668	30.3788	30.2982	31.3399	31.9537	32.6194	33.4401	34.7746	35.6908	36.3371	37.4495	38.7404	41.5533	43.0617	44.0855	44.0061	44.2138	45.7382	47.2244	47.4218	49.1976	51.7016	53.3	54.8612	57.2491	58.6741	59.5205	60.6127	61.6019	61.9874	62.7983	63.9362	63.5543	65.3515	66.1042	67.0558	67.5305	70.2687	70.7491	72.1308	72.6413	74.4854	74.8784	75.0724	74.7787
41	28.7712	28.9533	29.5334	29.6242	30.2826	31.1874	31.4763	32.0155	32.0705	33.1526	33.8121	35.1348	35.7455	36.3181	37.7099	39.645	41.4716	42.4944	43.6986	45.26	46.5669	45.9784	46.8107	48.2537	49.5464	50.6611	53.3106	54.7372	56.7411	57.9806	60.0648	60.6647	60.7593	62.1711	62.6009	65.952	64.5253	65.8025	67.092	67.1459	67.9135	68.9848	70.5405	72.2833	73.6594	73.7913	75.2059	75.2977	74.4931
42	28.1574	29.0833	29.91	30.1003	30.3832	30.6295	31.0331	32.8884	32.974	33.1688	33.8415	34.2963	35.3766	36.5398	37.9398	39.5948	40.3652	42.513	43.7458	45.0466	47.2636	48.6086	47.3791	47.6521	49.4737	50.4587	52.513	54.6973	55.982	57.8052	59.8398	60.3261	61.9309	61.9248	63.1979	64.491	64.3648	64.9769	66.0202	67.2434	68.538	71.0631	70.7072	72.3759	73.6342	74.4943	74.2229	73.3144	73.6495
43	27.8373	29.4115	29.5345	30.3027	30.6144	30.6399	31.0379	31.8822	33.0863	34.3141	34.4284	35.0489	35.4664	36.9106	38.1936	39.0817	40.6175	41.6772	44.0378	45.0585	46.719	48.8907	49.1363	49.7348	50.5596	50.9792	51.9029	55.1575	56.0651	57.068	58.784	60.0084	61.0394	62.5717	63.8127	64.9069	65.6556	67.3573	67.2762	68.2208	69.1591	69.9171	70.4586	72.4506	73.4728	75.5477	73.4807	72.2504	73.3286
44	26.7166	28.0265	29.2297	30.0884	31.3072	31.7559	32.2066	32.4972	32.8867	33.4464	35.0842	35.2408	36.1527	36.9463	38.095	39.2518	40.3832	43.1807	43.4771	44.5567	46.0493	47.5522	50.2791	52.0324	53.0259	52.5793	53.8323	55.5786	55.971	57.3891	60.2745	60.7336	61.3852	61.5451	62.2832	64.3706	65.9761	66.0228	67.749	68.2605	69.6832	70.2534	70.204	71.763	72.4302	72.9847	74.1601	73.7427	72.1264
45	25.8018	26.9869	28.321	29.8194	30.6626	31.3492	32.1113	32.9651	33.9058	33.8238	34.2295	35.2244	36.277	36.4414	37.8266	38.6645	40.6462	42.567	45.031	45.3112	46.7942	47.9543	49.3864	52.2597	54.0506	54.1729	55.2377	56.852	58.3629	59.0946	60.797	61.3032	62.0013	64.2267	63.5866	64.0735	65.2481	67.2734	67.7568	67.9587	69.3245	71.3954	71.4961	70.3514	70.4913	72.5719	71.9435	72.4103	73.0788
46	25.0538	25.7385	27.0167	28.0513	30.0105	30.823	31.4411	31.8539	33.1698	34.3195	34.5644	35.6965	36.0631	36.7041	38.7356	40.1043	40.4574	42.502	43.8674	44.9814	48.019	47.9238	49.3292	52.0115	53.2248	55.9346	55.389	56.5125	58.269	59.5409	60.1393	62.0398	62.7147	64.6269	64.5822	66.0219	66.4936	66.6306	68.2731	68.0723	69.8376	70.3853	71.7211	71.7547	70.3664	70.5263	70.2217	69.8342	70.1868
47	27.3399	27.6991	27.8747	28.4671	29.0228	29.9152	30.6375	30.7651	32.2496	33.4553	34.8127	35.0518	35.316	37.0132	38.484	39.5713	40.0116	42.632	42.8131	44.9994	47.2818	49.6136	50.1485	50.7681	53.2235	55.3324	56.4019	57.276	58.5241	59.8629	60.1125	62.0785	63.2694	63.6572	64.3836	65.4327	66.0004	67.5088	69.2508	68.7163	68.9487	69.5944	70.388	72.1809	71.2441	70.3247	68.067	69.98	68.0339
48	28.5691	27.7275	28.494	28.9139	30.3974	30.4385	30.5762	30.9333	31.1741	32.8197	33.3496	35.0125	36.3067	37.4758	37.7373	39.3017	40.2519	41.0812	43.1392	44.9386	45.694	48.4756	49.8911	50.6153	51.842	54.1026	55.4013	56.9692	57.5912	58.6267	60.7784	61.5876	62.5086	64.5114	65.6473	66.4516	68.5593	68.1525	69.8297	69.749	70.5767	71.0669	71.0083	70.8424	71.5454	70.6401	68.7029	68.1653	67.1528
49	28.407	28.571	29.4855	29.8165	29.6898	30.727	31.0531	32.5022	33.0448	33.2313	33.5566	34.5938	35.984	37.5163	38.5914	38.9607	39.3308	40.6376	43.027	44.3423	46.1647	47.9302	49.1064	49.8735	51.9277	52.7418	54.6111	56.3541	57.0726	58.282	60.1379	61.8597	63.3569	64.8894	65.9008	66.9831	68.3425	68.6503	67.9745	70.1841	68.8365	70.41	70.5438	68.9573	69.77	71.1764	69.776	68.3539	67.128
50	27.8393	28.9585	29.1149	29.4185	30.065	30.8747	32.443	32.818	33.4201	33.7754	34.582	35.2834	36.9115	37.6118	39.0057	39.4857	40.8405	40.7159	42.2567	44.5635	45.6598	47.5378	49.4722	51.48	52.8583	54.6265	55.004	55.7745	58.2093	58.1451	60.6901	61.5765	62.6072	63.727	65.0704	65.8597	67.1223	67.1882	66.9462	67.5062	68.5097	69.6462	69.9159	68.8575	67.9045	67.4148	67.4417	65.3864	64.4562
51	27.7016	27.9823	28.7149	29.2344	30.1834	30.3945	31.2645	32.3172	33.7748	34.8172	35.5532	36.2893	37.3392	38.7834	39.9138	40.4686	42.2161	43.307	44.5278	46.3668	46.6982	48.0016	48.9578	50.464	51.7269	53.096	55.2628	56.1398	57.9058	59.8757	60.0711	62.0524	62.9973	63.0121	63.0086	65.0923	66.9472	68.5996	66.9289	66.8551	67.8149	67.8419	66.9817	66.4642	66.0418	64.4391	65.6319	63.1119	61.6268
52	27.1347	28.2444	28.6674	29.1144	29.523	30.702	32.0039	32.5621	33.32	33.981	35.0502	36.4507	37.3672	39.1326	40.0731	40.4429	41.1594	43.4121	45.5781	46.8537	47.871	48.9748	48.2304	50.1577	52.2446	53.2413	54.911	55.8053	56.334	58.1513	59.3165	60.7851	62.4697	63.9125	64.7123	65.7274	65.6143	68.6189	68.9325	68.6131	67.051	67.0013	66.6257	66.4754	65.3258	63.7105	63.2667	62.2198	61.1074
53	27.5818	28.2187	28.6465	29.481	29.9642	30.4058	30.5955	31.8521	32.9328	34.1805	35.0685	36.3771	37.8665	39.0385	40.1904	40.6362	42.0849	43.2972	45.0953	46.3209	46.5009	48.9599	49.3353	50.685	52.8877	52.5673	54.5666	55.463	56.9707	58.41	59.324	61.4257	61.9932	62.6283	64.723	64.9891	67.1445	68.6427	68.2671	67.8919	67.6452	66.3073	66.7848	65.7798	64.8241	64.3682	63.1026	61.1022	58.7382
54	28.2768	28.5878	29.0806	29.5949	30.1343	30.5531	31.4829	32.4744	32.801	33.7464	34.4485	35.3015	37.2541	39.3489	39.0839	40.6702	41.9056	43.2367	44.6774	45.727	46.5193	48.3601	49.5382	50.85	53.1943	54.7647	55.5313	57.2498	58.6056	60.574	61.4229	61.6218	63.0264	63.4936	64.7273	64.9312	67.0476	67.6412	67.8703	69.3107	69.2441	67.0598	66.9924	65.8874	64.4716	63.8016	61.6045	59.4448	57.6272
55	29.0155	29.6042	29.9325	30.5389	30.5055	31.0795	31.6193	31.9692	33.2228	33.9797	34.7653	35.4466	36.2415	37.9279	38.4846	39.9527	40.9616	42.566	43.4158	44.973	45.1663	47.6314	49.4479	52.007	53.0822	55.395	55.9821	57.516	59.8298	60.4247	61.4866	62.6973	64.0529	64.3837	65.3046	66.9157	67.5638	67.0531	68.3229	67.7178	68.1689	67.323	65.0807	64.5583	64.2691	61.0987	60.0368	57.9167	55.3211
56	28.2956	28.9221	29.2385	30.2909	31.3412	31.4396	31.9208	32.78	33.28	33.1286	33.7065	35.5909	36.2521	37.0257	37.6902	38.1276	39.472	41.4638	43.6454	46.2126	46.4941	47.2429	48.3953	50.0523	51.2231	54.1606	55.9636	58.0188	59.0565	61.45	63.9167	63.7286	63.789	64.5096	64.8622	64.8064	65.7597	67.3453	67.8624	66.4365	66.4218	65.2815	65.3615	64.6851	62.6982	60.8219	58.678	55.8178	54.7084
57	28.5115	28.7433	29.0994	29.6082	30.2392	31.6321	32.6894	32.7007	33.3108	33.6534	34.0659	35.24	35.8218	36.6601	37.2633	37.7246	39.2166	39.5746	42.6758	43.9311	45.9238	47.0927	47.6078	49.0746	50.6649	53.0259	54.2675	56.4172	58.4202	61.3139	62.5326	62.4623	63.835	64.914	65.5275	65.3604	65.2799	67.2047	66.665	66.6673	66.5171	64.8951	63.1207	63.0763	60.9787	59.7894	58.45	55.6203	53.8643
58	28.2391	29.3696	30.114	30.2887	30.5289	31.5728	32.5164	33.3958	33.3314	33.5183	33.8678	34.407	35.2035	35.9229	37.0057	36.9766	38.3385	39.8072	40.5754	43.2727	44.951	46.3732	47.753	48.6234	50.4578	50.7304	52.7078	54.4629	57.3374	60.234	61.2441	62.611	62.2784	64.0401	64.8864	65.5735	66.5398	66.3112	66.8257	66.7458	64.6615	64.7829	62.4986	60.1587	59.6161	59.1622	56.759	54.0529	51.248
59	28.3517	28.7653	29.8798	30.6982	31.2149	31.6497	32.1521	32.8785	32.9026	33.0122	34.3195	35.0482	35.9522	36.4149	36.139	36.6128	38.0048	39.0196	40.8593	42.2007	44.023	45.6156	47.7482	49.3259	50.4469	51.9153	53.3115	55.3144	57.5372	58.345	60.2683	61.1219	60.6926	61.4701	61.358	62.2654	62.9591	63.5936	64.9536	64.1767	62.4351	62.7466	62.1291	61.0337	58.336	57.8774	56.5734	53.6641	51.2652
60	28.9646	29.5677	30.0036	30.809	31.2906	31.7761	32.0729	32.5907	33.5115	34.7403	34.8493	35.2598	35.7453	36.3023	36.7485	37.7768	38.9664	39.0975	40.2245	42.3555	43.5439	45.3413	47.2226	48.9165	50.4985	52.1128	54.1728	55.889	56.5819	58.3228	59.3342	62.6947	61.7448	61.3678	61.8268	62.6698	63.264	62.9097	62.7897	63.72	62.8168	62.8154	62.0742	60.7703	60.3792	58.0671	57.5032	53.0443	48.947
61	27.0224	28.2023	29.6061	30.1181	30.7266	31.19	32.3065	32.203	33.2369	33.4492	34.1588	34.8849	36.9577	37.3775	36.8627	38.0373	38.706	40.2973	39.57	41.7325	43.0685	46.0022	47.6229	48.7301	50.8267	51.7705	53.6247	54.7025	55.7741	56.5841	56.8546	58.8015	60.8323	61.4582	60.6091	62.4532	62.9241	63.8925	63.3549	64.0058	61.6172	61.8362	60.6823	60.5159	59.8461	57.597	56.3501	53.7993	49.6199
62	28.4471	29.0321	29.5644	29.908	30.2366	30.1706	31.04	31.5581	32.4642	33.0282	33.8879	34.3935	36.1253	37.7506	38.1799	38.6094	39.3703	39.9686	40.0625	41.5365	42.7207	44.0738	45.4466	47.6435	50.0874	50.9108	52.9174	54.7354	56.0791	56.7048	57.4	57.986	59.4483	60.3587	61.3212	62.9997	63.8269	64.0016	64.2478	63.6723	62.9615	62.3402	61.8429	60.1291	58.8962	58.5379	55.9748	54.0815	50.3777
63	28.648	28.6601	29.3031	30.1031	30.0892	30.6497	31.0817	32.0498	33.1785	33.0337	32.9105	33.7824	35.2712	36.8803	38.1041	39.3469	40.0016	41.4018	41.1833	42.2786	43.2094	45.0896	47.0414	48.9522	50.0184	52.3684	53.4423	55.411	55.8943	56.8815	57.6552	58.659	57.9013	58.6374	59.7347	60.97	61.3668	63.5635	61.893	61.8178	62.5342	62.2298	61.9048	60.8279	59.9972	59.2145	56.3444	54.9652	51.6037
64	28.7925	29.0863	29.3398	29.4119	30.4387	30.7117	30.5295	30.8159	31.1363	31.9408	32.4559	31.9622	33.8954	35.5368	36.9791	39.0329	40.2553	41.7668	42.3659	42.2323	43.8342	45.0023	46.9762	48.3591	49.9417	51.8151	52.7826	53.8423	53.9792	54.3262	55.14	57.3861	58.0912	58.573	60.6762	61.8536	63.2636	64.3807	65.2873	64.8907	64.1689	63.4135	63.3135	62.6581	61.2941	58.8228	56.7047	55.0022	51.9977
65	28.3497	28.503	28.9163	29.235	29.462	29.7335	30.323	30.3156	31.6959	31.9905	32.437	33.0599	34.0697	36.029	37.9316	38.5534	40.5903	41.9648	43.2128	45.5519	45.5137	46.203	47.9196	49.9659	50.937	51.7513	52.073	53.2915	53.419	54.3047	55.3729	57.2573	58.0048	58.4868	58.8505	60.0762	60.608	62.9388	66.6378	65.3139	63.7835	62.2618	62.6522	62.2735	60.3287	58.2138	55.9325	54.5333	53.0013
66	27.6475	27.3942	27.3202	27.9861	29.1328	29.9888	29.8524	30.7775	31.3575	31.9747	33.0551	34.6994	35.5642	36.4344	37.1413	37.9245	39.4184	40.8933	42.3083	44.2413	45.7509	47.1199	47.5983	48.5524	48.9516	50.7753	51.4808	52.5071	54.5794	55.5283	55.1794	56.2306	57.0996	58.6656	60.5719	60.325	60.8377	62.5796	63.4409	63.789	62.6648	61.8107	61.8329	60.8662	59.6262	56.9108	57.215	55.5704	53.6057
67	26.0603	26.7805	27.5936	28.4031	28.9812	29.9789	30.5447	31.1889	31.9203	32.238	32.9921	33.5817	34.328	34.8459	36.537	38.198	40.311	41.4898	42.6745	44.1251	46.4937	47.9408	48.0044	48.1613	48.788	49.2265	50.0239	51.6567	52.2098	54.4005	56.213	56.3843	56.4235	56.7458	56.9352	58.2117	58.9057	60.5362	60.5105	61.2188	62.1309	60.9944	59.2238	59.6809	59.0175	58.5168	57.1458	55.232	53.0754
68	26.3352	26.4411	27.342	27.691	29.0169	30.0823	30.1969	30.9745	31.6127	32.0863	33.6529	34.4028	34.3011	35.172	37.0071	38.1321	39.5216	41.4336	41.6826	43.7981	45.7938	46.2873	47.6376	48.9898	49.2838	49.4088	50.6203	51.3051	51.7147	52.0954	53.6413	54.9209	54.2696	55.6527	55.6129	56.9306	57.5829	59.1613	60.0442	59.9742	60.7561	61.3328	59.9106	60.7878	60.0361	59.9313	60.2739	57.7006	56.0274
69	26.3484	26.6228	27.755	28.5973	29.0497	28.8993	30.1272	30.8281	30.6565	31.7006	33.0881	33.6394	34.371	35.6757	36.9382	38.0112	40.3917	42.4028	42.6936	43.6159	45.5859	45.4637	46.1604	46.7207	47.7979	48.4476	49.7412	51.5523	52.3771	52.5178	52.8775	52.8211	54.1665	53.8937	54.8954	56.4109	57.494	58.9398	59.523	59.7009	61.1249	59.4103	58.5741	59.5874	61.8327	61.4246	59.8754	59.5888	58.4312
70	24.2001	25.8289	27.386	27.7872	28.0704	28.4125	29.1123	29.5716	29.608	30.1335	30.9655	32.5465	33.6443	34.5903	34.9833	37.3312	38.4977	39.0837	39.9146	41.462	43.0439	43.8592	45.1373	45.7863	46.7002	48.0454	48.9474	50.5248	50.7408	51.9741	51.6482	52.4932	52.6684	52.9797	53.8768	55.4683	56.2393	56.259	57.6912	59.1362	59.6229	59.1147	60.0222	59.3635	59.8011	59.1703	58.2598	58.5599	56.6222
71	24.0311	25.7813	26.9735	26.5551	27.3868	28.248	28.6651	29.6183	30.2344	30.7283	31.723	32.2906	33.1198	34.2571	34.6962	35.5124	37.274	38.244	37.9241	39.1285	40.9073	41.8125	43.5054	44.7	45.8756	46.7661	47.9437	47.7251	48.5975	49.2706	51.3067	51.5746	52.3331	52.997	54.0083	54.7246	56.1812	56.7244	57.7465	59.0529	57.8366	58.3338	58.2929	58.3517	60.1847	58.1525	57.1161	57.6814	56.4024
72	25.7968	26.1826	26.5873	26.6566	26.9064	27.5474	28.3848	28.9327	29.532	30.1701	31.002	32.0187	33.0779	33.9563	34.3351	36.1343	36.9853	36.7515	37.5116	37.7303	39.8275	41.3703	41.6407	42.2446	44.3169	45.9618	45.4477	46.2802	46.7135	46.7381	47.9836	48.6528	49.9182	51.8816	52.6421	53.8555	54.9071	57.4881	59.2625	59.2389	58.9121	57.7046	58.3396	58.771	59.2688	57.4401	56.7947	56.1	55.3224
73	23.9352	24.2884	25.0197	24.8376	25.6208	26.1339	27.5775	27.8253	28.3443	29.0651	30.0442	31.5093	33.0911	33.4385	33.1306	34.3632	34.8615	34.9503	35.6862	36.7997	38.1363	38.9848	41.3568	41.0384	42.0349	43.3345	44.0442	44.7938	45.0002	47.3733	46.9495	48.0406	48.5461	49.7423	51.2595	52.5943	53.073	54.9384	56.1062	58.7215	60.0049	60.0569	60.9005	60.6787	60.1442	58.8218	56.0784	55.3334	56.3517
74	22.9066	22.8751	23.4126	23.9529	24.7015	25.7584	26.9668	28.4115	27.899	28.7135	29.9053	30.5141	31.5853	32.3052	32.5193	32.9433	34.4487	35.1511	36.0783	36.342	37.0878	38.0905	38.4297	39.2687	40.1702	40.4643	42.1722	42.6492	43.2221	43.3646	45.191	46.763	47.8144	50.0706	49.4802	50.7566	52.9605	54.5929	56.9086	58.297	59.6801	60.3034	60.3591	59.1068	60.0224	61.3198	59.4251	59.9007	59.5471
75	22.58	22.9827	23.4049	24.9686	25.7231	26.3552	26.3017	27.2656	28.0802	28.2987	27.8563	28.9571	29.1575	30.2742	31.0795	32.2995	33.9842	34.6983	34.9282	34.9976	36.5873	36.9236	37.1069	37.0732	38.1322	39.9856	40.243	40.9649	41.3268	42.1833	44.0245	46.3317	47.3964	49.6436	49.455	49.9208	52.4183	53.1555	54.3584	55.0748	56.9413	56.7226	57.3175	59.1731	59.0322	60.6897	59.4464	59.3736	57.8117
76	22.3693	22.5551	23.4995	24.2852	24.153	24.3082	25.1749	25.5814	26.7678	26.6756	27.1787	28.1495	28.2464	29.5256	30.8411	31.1709	31.7797	32.2965	33.1876	34.0597	34.65	35.0033	36.0236	36.4091	37.3026	39.0208	40.0121	39.9789	41.0573	42.0454	43.1988	46.4065	48.1475	49.1803	49.2542	50.0136	50.9315	52.6795	52.0435	53.5791	55.7633	57.0775	57.386	57.8502	58.0578	58.7494	59.7663	60.0868	56.6012
77	21.4929	21.9077	22.1374	22.8419	23.2155	23.3469	23.9694	24.7362	25.3772	26.0689	26.2355	27.126	28.4183	29.2438	29.7941	29.547	29.8012	30.5237	30.778	31.6994	31.5365	33.8072	33.8177	34.7096	36.0214	36.4771	36.7167	38.1965	40.4494	41.3969	42.8395	44.7403	44.2851	45.4094	46.5637	48.9517	50.4342	51.9336	51.6944	52.9926	54.5953	55.8768	56.2587	57.1478	57.3946	57.5661	57.7721	57.1744	55.9609
78	20.4642	20.7861	21.1249	21.8629	22.4496	23.1159	23.8524	25.307	25.2968	26.0442	26.4117	26.7137	27.25	27.0358	27.7427	27.3098	28.8237	29.1107	28.8161	29.5773	30.3412	31.8586	33.4151	34.3837	34.5643	35.1418	35.4825	35.8141	37.5924	39.0464	40.696	42.4207	43.0481	43.0502	43.8475	46.2277	48.0878	50.0943	51.3122	52.1268	53.8851	54.277	54.9117	54.2701	55.1727	55.8195	55.3319	56.6679	55.2994
79	19.9299	20.5045	21.3842	22.2655	22.8662	23.9689	24.5091	24.1975	25.3838	25.496	25.7969	26.3005	26.532	26.2774	26.8344	27.2311	27.967	28.0206	28.8293	29.4745	30.0381	30.6877	31.8809	32.5479	32.3856	33.3763	34.3773	35.0946	36.2576	37.6137	40.0781	40.9609	41.8035	42.6245	43.2517	45.3919	46.9152	47.6449	48.2589	49.3091	49.8429	50.1078	52.3179	53.857	53.934	55.034	54.5069	54.8406	55.3835
80	20.4913	20.8576	21.19	21.6329	22.1504	22.832	22.6317	22.9392	23.3884	23.8996	24.6956	25.5999	26.0826	26.5807	26.3824	27.1405	27.5174	28.9373	29.1558	29.2775	29.6291	29.8072	29.4894	30.4116	32.0334	31.7949	32.0102	33.7996	34.3156	36.6633	37.6601	39.2416	39.2803	39.8359	41.5144	42.7752	42.9164	44.9014	45.8282	46.5171	47.8151	48.7793	50.0247	51.7406	51.4473	51.8564	51.9004	52.9591	52.8855
81	20.5869	20.7559	20.8573	21.4178	21.5241	21.7563	22.3184	24.0968	24.7567	24.7192	24.7955	25.0187	25.2715	25.9925	26.095	26.4853	27.1548	27.8583	27.6201	28.7672	28.0378	28.7252	29.9839	30.3753	29.7202	30.2494	31.1115	32.8725	34.3148	36.1823	36.4132	36.5577	36.8131	38.5465	39.8575	40.5955	40.4488	42.2626	41.8303	43.312	45.4584	46.1128	48.474	48.7115	49.1733	48.5093	50.3929	50.8181	51.2974
82	19.5614	19.802	20.1346	20.7374	21.032	21.8459	22.8187	23.5395	23.5569	24.1341	24.6778	25.0002	25.0598	24.8388	25.1535	25.9642	26.3687	26.8621	26.9226	27.4385	27.7312	28.9763	29.9578	29.5895	30.5063	31.5495	31.3539	31.2955	33.0233	34.2081	35.0663	36.211	36.5725	37.9893	38.3286	37.4195	38.1512	40.0398	40.5666	41.9742	43.8829	45.5589	47.8175	46.4431	45.314	46.7817	48.1017	49.2036	48.1418
83	19.1787	19.7973	20.1439	21.0434	21.5393	21.7337	22.161	22.2568	21.6857	22.9981	24.3234	24.5699	24.1292	24.5897	24.6419	26.2212	26.3988	26.0622	26.6697	26.5375	27.5971	28.3013	27.6923	28.8736	29.5226	30.5485	29.7971	31.4815	32.1056	33.0371	33.203	34.8622	35.1771	36.4852	36.7173	36.9436	37.3542	38.6445	40.1399	40.7929	41.6073	43.2848	44.3056	42.8994	43.4495	44.5035	45.2589	45.1356	44.8079
84	19.2489	19.8855	19.8398	20.4613	20.6849	20.7657	21.4392	22.193	22.484	22.4978	22.9057	22.7241	23.3161	23.4573	24.1968	24.2738	24.2165	25.2517	26.1236	26.7378	27.4307	27.5263	27.3937	28.1129	29.242	29.8695	30.1167	30.5946	32.1196	33.4786	33.4156	34.2717	35.5055	34.8476	35.7689	36.0972	36.568	37.8913	38.59	38.0787	38.6019	39.6357	41.1813	42.036	42.4214	43.3757	43.1683	42.8483	43.4147
85	20.0341	20.3751	20.5356	20.8343	21.287	21.3477	22.0342	21.0681	21.0527	21.3948	21.6652	21.7244	21.9836	23.013	22.9342	23.5539	24.6323	24.7331	25.4836	25.8003	26.1921	25.7436	26.4731	27.0577	28.0374	28.4097	29.1978	29.902	30.8815	32.5846	32.9277	33.448	34.3045	34.5887	35.7244	35.315	35.622	36.9795	36.742	36.7401	37.1603	37.5962	39.4319	40.0537	41.0821	41.1517	41.3708	40.4496	40.1047
86	20.0038	20.6578	20.5094	20.728	20.5257	20.1871	20.2789	20.3165	20.8531	20.7922	20.8732	20.5782	21.1255	21.6821	22.1975	23.1974	24.4385	24.2955	23.7391	23.9432	24.166	24.1937	24.6568	25.9059	27.8837	27.8586	27.6498	29.2138	29.2942	30.6901	30.6728	30.8204	30.7351	32.3048	32.9537	33.3728	34.0902	34.4949	35.3226	35.1874	35.0028	35.2436	37.1873	37.1164	37.4546	38.8824	38.8956	38.4834	37.28
87	19.5016	19.8916	19.9741	19.8803	20.0038	19.8256	19.7768	19.9852	20.4806	20.3409	20.4699	20.6608	20.5358	20.8896	21.4119	22.087	22.0958	22.2922	22.6066	22.7724	22.5634	23.4682	24.5312	24.814	25.3959	25.763	26.4566	28.1944	29.3553	28.959	28.6312	29.1494	30.0712	30.5652	30.8496	30.6804	31.7595	33.0235	33.5333	33.4137	33.8188	34.9973	36.1308	35.24	35.7977	35.75	35.6954	34.4928	35.8844
88	18.9907	19.5847	19.3462	18.715	18.6083	18.987	19.3233	19.434	19.972	20.0451	19.9018	19.8945	20.3464	20.6143	21.3022	21.6671	21.5683	21.9367	22.172	22.3793	22.5483	22.8716	23.3305	24.1766	24.8893	25.6497	26.7953	27.4361	27.5052	27.9507	27.6294	28.8724	29.5971	29.1272	29.8666	29.7588	29.5184	30.5969	31.4336	30.7813	31.3394	30.6405	32.0893	33.0924	34.0811	33.9805	32.9026	32.7124	32.1793
89	18.5986	18.6314	18.3427	18.5306	18.4815	18.266	18.9714	19.2109	19.2384	19.5104	19.4684	19.7623	20.1452	20.2951	21.0484	21.3453	21.5135	21.6823	21.757	21.705	22.8733	23.4189	23.7626	23.9439	25.2456	26.01	26.8968	27.2419	27.2213	27.7052	26.9594	28.0542	27.66	27.5841	27.1565	26.921	28.14	27.7262	28.01	27.4872	28.1821	29.1676	29.7702	32.7243	32.6242	31.8697	30.6195	29.7971	28.0667
90	17.7183	17.7908	17.8672	17.8314	17.8958	18.1293	18.0594	17.9967	18.4427	18.3896	18.5484	19.068	19.3613	19.8277	20.0282	20.5885	20.1684	20.7974	21.6411	22.0303	22.6067	23.6699	23.9401	24.7449	24.7971	24.6511	25.6578	26.0267	26.8168	27.4404	26.0906	25.6508	25.6922	24.9371	25.1667	25.4036	26.5067	26.7952	26.3735	25.8023	26.493	27.7058	28.8967	29.1914	29.283	28.4217	28.2466	27.8327	26.4035
91	17.6599	17.3568	17.4897	17.3039	17.4402	17.6791	17.8647	17.9586	17.9885	18.0634	18.5393	18.63	18.8945	18.7054	19.2331	19.4839	19.8092	20.3943	21.1265	21.0834	22.2818	23.0307	23.3109	24.2742	24.9035	25.0818	24.9422	25.0604	25.2427	25.1874	24.6655	24.6493	25.1004	23.9602	25.3999	25.2567	25.4366	25.5202	26.0184	25.907	25.8414	25.6286	26.2132	26.6334	25.8592	24.7248	25.4552	25.2345	25.648
92	17.4297	17.0997	16.3323	16.8625	17.0801	17.1347	17.0213	17.1541	17.1739	16.9225	17.8769	18.0369	17.9228	18.2155	18.2533	18.7247	19.4289	19.4066	20.4871	20.5613	21.0543	20.7776	22.1721	22.9912	23.2666	23.1763	23.9732	23.2489	23.0646	23.3207	23.5863	24.2853	24.0073	23.5865	23.9723	23.8437	23.8258	23.3754	24.5214	24.4681	24.2469	24.4454	24.152	23.2589	23.7717	24.3885	23.8333	24.1239	24.1104
93	16.519	16.015	16.4468	16.8176	16.8676	16.8745	16.5817	16.5691	15.8549	15.5341	15.7134	15.9816	15.9176	17.6361	17.9529	18.3397	18.7894	19.0835	19.7184	20.2468	20.1924	20.5395	21.405	21.895	21.6411	21.604	22.5553	21.883	22.9324	23.4786	22.4817	22.2648	23.4108	23.2758	23.2184	21.4565	22.1898	22.7655	22.2954	23.0929	22.6711	21.2893	21.8698	23.2381	23.6852	23.7534	22.8433	23.3977	23.7845
94	14.202	13.9352	14.0398	13.8335	15.2195	14.6145	14.5914	15.1025	15.9135	13.8157	15.8373	15.1864	15.0225	17.622	18.0323	18.0089	18.304	18.6721	19.3277	19.2336	19.4726	19.7611	19.724	19.9752	19.6002	20.2922	20.7691	21.3362	21.7333	21.4524	21.6173	21.4044	22.2164	21.4942	21.706	21.0563	20.8303	20.856	20.9224	21.5756	22.0071	22.5159	22.1161	22.5386	22.4272	22.6727	22.7546	22.5567	21.1513
95	13.6661	13.9139	13.3029	13.9131	14.2477	15.5639	15.284	14.2658	14.122	12.8929	14.1234	15.826	15.4147	17.2155	17.3172	16.698	17.8933	18.1729	17.8242	18.1306	15.8694	14.903	16.413	16.3951	17.9311	19.1823	20.0494	20.1982	19.8317	19.9086	20.2178	20.3699	20.2456	20.4185	20.1917	20.2637	20.7439	20.2511	20.687	20.9816	21.3146	20.6849	20.7216	21.1651	21.9446	21.0796	20.6254	19.5956	18.0631
96	11.0496	10.883	11.4886	12.3963	11.3623	13.334	12.5698	12.3847	11.0381	11.9916	12.3741	12.5043	14.029	13.2143	14.4594	15.594	15.073	14.3359	13.5819	12.6432	12.6041	14.2691	15	15.6954	16.2621	16.2693	18.4577	18.6937	19.5816	19.3207	19.7056	20.1314	19.6523	19.5443	18.3201	18.7641	18.2374	20.0459	20.3915	19.8375	19.0719	17.9336	19.6363	19.4898	17.6751	17.8003	15.8635	17.2103	14.7715
97	9.52708	11.8149	11.0358	10.9695	10.3531	12.278	13.0672	9.92527	10.0662	9.71736	9.9989	11.4012	11.7739	13.4356	12.7806	12.5225	11.0416	10.5865	11.3193	11.4673	11.7767	12.6707	12.984	14.1035	12.9661	15.8855	16.8963	15.6956	15.929	17.3994	17.7789	17.3512	17.255	18.6115	17.5206	15.4812	16.1205	16.6775	18.9651	17.5226	15.5282	16.3356	14.5233	16.5718	15.5477	14.5114	14.5147	13.9867	14.1929
98	8.77333	9.43713	9.9192	10.1646	10.4095	10.3078	8.98185	8.90978	8.54172	8.69751	9.38006	11.2675	12.0219	10.9202	10.1402	9.31089	9.58009	10.5266	10.7444	10.8519	10.9682	12.7855	12.0718	13.4432	12.8422	14.0307	14.3105	14.9957	15.351	14.6331	16.2368	16.3889	16.4407	17.0007	16.0745	13.544	14.3996	14.0285	15.5306	13.954	14.2704	14.5394	14.8584	16.1138	13.6642	12.4751	12.8518	12.3316	11.8636
99	7.84633	8.73309	8.70219	8.89999	8.57795	8.42246	8.37619	8.34615	8.42434	8.93243	9.19751	10.0197	9.45957	9.01992	8.98756	9.04541	9.38952	9.76236	9.46463	10.5744	11.2323	10.8102	10.7764	11.1486	11.7413	11.8973	13.8366	13.3371	13.1734	12.4222	13.2927	13.9998	15.9626	13.9415	12.1708	11.6663	11.8607	12.4922	13.5027	12.8508	12.7209	12.8286	12.7859	13.5364	11.6422	11.301	11.4955	11.6952	11.8635
100	7.41007	7.57198	7.60779	7.64414	7.87411	7.85532	7.80938	7.93118	8.06486	8.17378	8.12706	8.5364	8.99391	8.99105	9.04916	8.95706	8.64774	9.22192	9.51452	9.6035	9.76914	10.096	10.4941	11.3434	11.2946	10.2858	10.6236	12.5614	12.6725	11.8081	11.4491	12.5616	12.4938	10.8317	11.86	11.1362	11.1336	11.6731	11.6431	11.2931	11.2053	11.9194	11.8285	11.8269	11.5206	11.0229	10.7012	10.9703	11.134
101	7.17109	7.18985	7.42188	7.37865	7.47908	7.62137	7.58145	7.56659	7.54382	7.56854	7.96085	8.24316	8.7881	8.72189	8.66292	8.65156	8.69729	8.96111	9.02199	9.46102	9.86563	10.3099	10.6641	11.7187	10.484	11.1961	12.1436	11.6743	10.6316	10.8604	9.7632	10.4183	10.0461	11.0893	10.4629	10.8375	10.5775	10.4173	10.0217	10.8013	10.4211	10.9133	10.7294	10.4182	10.6456	10.7272	10.9328	10.5359	10.9654
102	7.09927	7.04464	6.9876	7.2992	7.60907	7.42275	7.33612	7.3402	7.35021	7.89837	8.13018	8.10334	7.94198	8.00082	8.43357	8.64428	8.77635	8.94769	9.19251	9.78776	10.3522	10.3225	10.3943	10.421	10.2434	10.0978	10.1739	10.211	9.97215	9.91403	9.85347	9.54511	9.58865	9.70286	9.931	10.0627	9.89998	9.98113	10.1641	10.2487	9.82489	9.88562	9.70125	10.0789	9.45612	9.46498	9.7942	10.2769	10.4514
103	6.60924	6.73199	6.9488	6.90905	7.34399	7.42275	7.28112	7.38586	7.83306	7.6855	7.89757	7.6429	7.95946	8.40643	8.44279	8.63536	8.86962	9.00371	9.22246	9.04201	9.80807	10.5107	10.7686	9.54555	9.22502	9.64276	9.51785	9.19135	9.21264	9.30335	9.55189	9.45732	9.28861	9.30335	9.66845	9.76495	9.69426	9.5111	9.44601	9.33207	9.07302	8.97893	9.21865	9.16712	9.02922	9.40245	9.40245	10.4436	10.0253
104	6.68288	6.83819	6.99885	6.96088	7.28113	7.28111	7.28111	7.31306	7.38017	7.62653	7.90779	7.79964	8.20714	8.13703	8.45969	8.5943	8.82329	8.6104	8.83977	9.4348	9.46065	9.47359	9.69605	9.14968	9.10633	9.03052	9.1507	9.08633	9.06096	9.46648	9.54231	8.9909	8.99677	8.98136	9.32967	9.1679	9.26993	9.0526	8.5908	8.71468	8.67223	8.84394	9.02104	9.03112	8.8522	9.21436	9.49284	9.45216	9.51803
105	6.80923	7.02449	6.70334	6.93658	7.04724	7.20874	7.30438	7.49959	7.46826	7.63985	7.78839	8.0338	8.0338	8.09591	8.50555	8.28942	8.5955	8.58334	8.87394	9.13972	8.77509	9.51394	8.84232	9.27708	9.05825	8.82165	8.88665	8.92315	8.96371	9.32628	8.47356	8.61871	8.5167	8.56371	8.76147	9.01197	8.56856	7.99774	8.01472	8.52151	9.0258	8.53902	8.25347	8.27992	8.1565	8.89091	9.12061	9.21755	9.44069
106	6.66161	6.71843	6.93013	6.87268	6.90449	6.936	7.41212	7.2362	7.6377	7.60526	7.85358	7.80477	7.8918	7.88843	8.16719	8.10466	8.04892	8.13169	8.3028	8.6018	8.60465	8.48034	8.57535	8.77134	8.63792	8.53752	8.5705	8.45163	8.79983	8.35978	8.40256	8.30075	7.96797	7.92617	8.27923	8.0877	8.30454	8.15465	8.50381	8.49632	8.5416	8.02021	7.45339	8.13448	8.21854	8.53508	8.51044	8.36647	8.79765
107	6.89602	6.98389	6.86266	6.58716	6.76599	7.1546	6.95193	6.92027	7.47534	7.67219	7.56134	7.42234	7.51631	7.72985	7.7584	7.7029	7.75517	8.2992	8.42865	8.45758	7.72378	7.96095	8.54537	8.11716	8.6063	8.1043	8.28547	8.36391	8.57031	8.05168	8.16803	8.37782	7.97063	8.05631	8.02586	8.01593	8.03896	8.34573	8.21108	8.18565	7.86758	7.76032	8.15234	7.95417	7.54117	7.68003	7.70393	7.65818	7.83221
108	6.50691	6.32579	6.40083	6.70433	6.90449	6.71187	6.66023	7.10798	7.29603	6.87244	6.73459	6.90976	7.48232	7.82874	7.77539	7.6266	7.65855	7.88327	7.95339	7.6194	7.56659	7.86625	7.53112	7.79423	8.19945	8.34958	8.34227	8.11882	7.79172	7.42701	7.91808	7.2513	7.25311	7.50186	7.94749	8.3015	8.20152	8.13763	7.34021	7.82324	7.28681	7.45406	7.4237	7.21914	7.26773	7.74797	7.29198	7.22091	7.57042
109	6.17735	6.36075	6.32202	6.3597	6.16908	6.30123	6.67764	6.72339	6.61144	6.87562	6.88605	7.02906	7.32999	7.30182	7.58476	7.51443	7.7728	7.51344	7.11735	7.12014	7.21459	7.27665	7.5297	7.80833	8.1574	7.82534	7.42701	7.42701	7.23888	6.64249	6.27541	6.75424	7.30884	7.38318	7.59747	8.01617	7.66974	7.22096	6.98804	7.21404	6.91901	6.98699	7.40385	7.2504	7.01386	7.5419	7.12755	7.20685	6.95074
110	6.17557	6.191	5.96813	5.97544	6.21339	6.31509	6.2527	6.61144	6.88605	7.07345	6.86626	6.90562	7.02906	6.91728	7.08239	7.20708	7.29662	6.50999	6.79764	7.12799	7.2711	7.51763	7.60395	7.52574	7.34814	6.78251	6.43359	6.68806	6.52563	6.22214	6.59426	6.84226	7.22161	7.4007	7.28462	7.282	6.56462	6.47491	6.26906	6.15973	6.19544	6.80702	6.86721	6.29707	6.74963	6.15446	6.86428	6.3472	6.67023
111	6.0107	6.01229	5.99636	6.0963	6.42641	6.39804	6.56936	6.8321	6.70018	6.36809	6.50705	6.44936	6.6527	6.81076	6.59997	7.07285	6.78649	6.66496	6.7878	7.0017	6.42197	6.62031	6.3611	6.72352	6.67907	6.34533	6.28553	6.19288	6.67779	6.21184	6.06063	7.07367	7.25311	7.26907	7.18928	6.25237	6.30087	6.07245	6.12735	6.24452	6.59369	6.65855	6.17182	5.77235	6.26706	5.31822	5.69263	5.96825	6.26706
112	5.90187	6.2526	6.34875	6.17944	6.44438	6.41623	6.76077	6.40586	6.14761	5.85084	6.28348	6.28536	6.41047	6.63192	6.53745	6.21388	5.83178	6.25208	6.59759	6.20412	6.08852	6.13837	5.86272	6.51478	6.15922	6.15863	6.00217	6.02543	6.5674	6.34279	6.94076	7.08721	7.13922	7.10136	6.46017	6.019	5.76605	5.89539	6.13495	6.05149	5.75142	6.31094	5.61763	5.70835	5.65553	5.18963	5.63357	5.99787	5.89452
113	6.31392	6.07767	6.34976	6.10406	6.10343	6.07037	6.04942	6.09454	5.96632	5.90789	6.07037	6.24264	6.15267	5.98402	5.71981	5.84515	5.93382	6.51834	6.1049	5.67865	5.91158	5.73728	5.5576	5.80304	5.90412	5.55653	6.11965	6.21713	6.23164	6.8226	7.05612	7.22161	6.91772	6.43147	6.12136	5.75246	5.4397	5.7521	5.75246	5.61763	5.64082	5.7286	5.67013	5.94924	5.26145	5.08581	5.5216	4.75988	5.20346
114	6.06433	6.00087	6.01194	5.92027	6.02213	5.98782	6.03251	6.12703	5.96694	5.59071	5.57958	5.64755	5.63691	5.60089	5.55398	5.84856	6.2094	6.04209	5.74959	5.22608	5.34427	5.25433	5.49597	5.54206	5.82663	5.64258	5.97184	6.08551	6.85483	6.92027	7.09523	6.40918	6.25259	6.17271	5.72928	5.51054	5.33087	5.34309	4.6147	4.78411	5.60972	5.66941	5.93608	5.61764	5.09107	5.12429	4.41694	4.5207	5.06264
115	5.7796	5.77582	5.78086	5.78086	5.75802	5.71869	5.77537	5.56677	5.46503	5.52219	5.49282	5.42754	5.2505	5.46419	5.62576	6.01903	5.75327	5.70751	5.51716	5.22865	5.34462	5.23356	5.34462	5.5773	5.48883	5.67131	6.15338	6.22344	6.16124	6.37095	6.61514	6.07104	6.09545	5.84758	5.65584	5.23252	4.53749	4.6147	4.28973	4.81414	5.78406	5.89282	5.64216	5.3778	5.07603	4.75189	4.42424	4.43498	4.82171
116	5.55745	5.58664	5.55757	5.5576	5.61974	5.46334	5.45937	5.49588	5.46503	5.49103	5.01409	5.18925	5.46334	5.68149	5.62291	5.07694	5.25201	5.58639	5.85627	5.34427	4.85055	5.25433	5.47833	5.48487	5.61933	5.84796	5.69552	5.87314	5.98257	5.82671	6.07213	5.98214	5.73653	5.63789	5.08143	4.3003	4.42362	4.51538	4.44357	5.47864	6.31233	5.78273	6.20551	5.47339	5.0307	4.93819	4.23364	4.01297	4.38706
117	5.37015	5.46419	5.49691	5.46727	5.46162	5.45937	5.45937	5.55215	5.46503	4.71404	4.84768	5.2505	5.28272	5.46334	4.93201	4.89123	5.25125	5.2505	5.01623	4.9355	5.02339	5.43506	5.66357	5.7431	5.74598	5.45639	5.44953	5.27339	5.68362	5.83966	5.82506	5.66631	5.44288	4.68488	4.23156	4.03301	4.03301	4.3271	4.59984	5.79421	5.35715	5.51421	5.87599	5.77987	4.64622	4.3464	4.0257	3.90259	4.26417
118	5.4301	5.46042	5.46334	5.26491	5.22113	5.26204	5.31242	5.0399	4.5967	4.8503	4.85035	5.10703	4.95146	4.91561	4.84495	4.90921	5.09029	4.84219	4.95997	4.74904	5.28942	5.5239	5.52783	5.50353	5.45639	4.98775	5.35203	5.108	5.58471	5.79179	5.61879	5.50503	4.50098	4.03301	3.81196	3.93746	3.71744	3.90497	4.27707	5.03471	5.49493	5.95727	5.38965	4.96455	4.12823	3.91543	2.88259	3.64427	3.99044
119	5.43425	5.11042	5.11478	5.21417	4.98706	4.98686	4.84607	4.49211	4.68097	5.07082	4.8536	4.80002	4.87794	4.84357	5.06585	4.84938	4.72791	4.66607	4.69004	4.95925	5.14036	5.45639	5.39109	5.45819	5.05159	4.85955	5.0874	5.30978	5.52022	5.46334	5.33621	4.5184	3.6557	3.95028	4.02189	3.71744	3.80826	3.77229	3.71698	5.3132	5.5576	5.34368	4.4621	4.87354	3.91543	3.39896	2.89871	3.1741	4.5143
[truncated: 71 more columns]
