# Supplementary material for: Unexpected long-term variations of Saturn’s ring current revealed by energetic neutral atom imaging
Source: Research Square preprint supplement (doi:10.21203/rs.3.rs-3271171/v1), 2023-09-18
Supplement: Supplementary file 15 [file a25d00ef760912a32e652c36.xlsx]

## Sheet: Period4_ENA density
	0	1	2	3	4	5	6	7	8	9	10	11	12	13	14	15	16	17	18	19	20	21	22	23	24	25	26	27	28	29	30	31	32	33	34	35	36	37	38	39	40	41	42	43	44	45	46	47	48
0	3.59559	3.51502	3.62482	3.61169	3.70851	3.89757	3.90653	4.19391	4.30399	4.32188	4.50786	4.5723	4.69732	4.79033	5.02175	5.29667	5.05299	4.94755	5.35723	6.46439	6.89646	8.65805	10.8926	11.7565	9.07526	8.09411	10.4136	11.305	12.2858	13.2325	12.4547	13.572	13.8642	14.8103	15.0698	14.9327	15.6222	15.5061	16.0631	16.2169	16.2026	16.1536	16.0128	16.4032	17.2356	17.8007	18.157	17.9851	17.3432
1	3.43567	3.62294	3.46454	3.6787	3.66993	3.89757	3.89806	4.15109	4.3897	4.39936	4.50806	4.69696	4.66336	4.89315	5.03352	5.26377	5.10278	5.27151	5.82486	6.80305	7.9789	9.15949	11.8945	12.8059	11.6664	10.3437	11.2819	12.6859	13.2599	13.6464	13.7048	14.0019	14.23	15.4289	15.4824	15.6645	15.7867	16.1426	16.2431	16.672	16.6188	16.8696	16.5899	16.8814	17.0106	17.6806	18.1717	18.2618	17.8652
2	3.61773	3.78144	3.62482	3.66926	3.80016	3.80978	3.94255	4.136	4.192	4.40014	4.53148	4.76543	4.8351	4.98283	4.95729	5.21441	5.23294	5.88272	6.138	7.48698	8.82996	10.4946	11.6771	12.7108	13.4315	12.4922	11.6724	13.5172	13.6213	14.3813	14.3618	14.376	14.6135	15.3556	16.023	15.8852	16.018	16.3481	16.6627	17.1528	17.4629	17.1324	17.0568	17.4485	17.3491	18.0081	18.5606	18.5551	18.187
3	3.78661	3.81071	3.8206	3.89724	3.91181	3.91295	4.13273	4.26165	4.24669	4.43889	4.63801	4.89056	5.09078	5.05202	5.27573	5.25178	5.60644	5.77809	6.24016	7.3165	9.26252	11.2313	12.6725	13.5612	13.6124	13.7111	13.531	13.9283	14.403	14.6645	15.0801	15.0074	15.1967	15.3387	16.0219	15.9149	16.4244	16.7097	17.0071	17.8971	18.2891	17.747	17.6719	17.5679	18.1218	18.5802	18.9935	19.0298	18.7684
4	3.67285	3.82	3.92833	4.00983	4.11917	4.10891	4.14349	4.38751	4.43588	4.4929	4.70056	4.90818	5.05155	5.1225	5.46147	5.59722	7.06107	7.12181	6.75977	7.39174	8.39749	11.3626	13.3631	13.6347	14.2958	14.4435	14.2586	14.6788	14.4794	14.6145	15.0896	15.5308	15.5706	15.5067	15.873	16.1523	16.5475	17.3027	17.4279	18.0054	18.2719	18.0357	18.2828	18.4769	18.7795	18.8598	19.3743	19.2875	19.0179
5	3.61584	3.8604	3.96559	4.03594	4.17703	4.43975	4.41429	4.54053	4.6074	4.497	4.60511	4.89932	5.0405	5.28478	5.41938	6.20906	6.96157	7.93353	8.30313	9.29885	9.70924	10.5806	13.2721	14.2207	14.6696	14.6425	15.1613	15.1758	14.9753	15.1438	15.2833	15.2089	15.8374	16.0287	16.6931	16.4294	17.2747	17.7741	17.6599	18.4329	18.91	18.8424	19.1777	19.7669	19.354	19.9272	20.3871	20.3909	19.7237
6	3.78297	3.96015	4.02338	4.19908	4.20519	4.649	4.63636	4.61178	4.60191	4.61178	4.70537	4.74681	5.04841	5.45125	5.84982	6.01766	6.95403	8.52919	8.22853	10.0425	11.2996	11.153	13.8137	14.2304	14.7681	15.1309	15.3593	15.0758	15.1063	15.6104	15.8131	15.8131	16.0267	16.2415	16.8936	16.9657	17.2406	17.9332	18.2315	18.5015	18.9926	19.286	19.7359	20.0537	20.047	20.7964	21.066	21.1815	20.8487
7	3.73235	3.98951	4.19354	4.24395	4.29403	4.39281	4.66101	4.67503	4.72132	4.83453	4.85658	4.9682	5.2318	5.43142	5.63005	6.59563	6.96277	7.58207	9.18412	11.263	12.0251	11.9947	13.8637	14.9661	15.1041	15.2717	15.7143	15.4942	15.7496	15.8715	16.1272	16.3349	16.349	16.8082	17.5674	17.2757	17.3495	18.1292	18.4138	18.6644	19.1159	19.978	20.27	20.5808	20.2828	21.5165	21.6631	22.0048	21.8234
8	3.77773	3.80826	4.07153	4.27278	4.45703	4.4737	4.68807	4.76173	4.85213	4.78583	4.9682	5.00326	5.24157	5.60738	6.26181	7.50919	7.30011	7.7679	8.88422	10.7796	12.3043	13.6383	14.147	15.2231	15.5547	15.6496	15.7919	15.9707	15.7931	16.2798	16.7538	16.9629	16.886	17.1691	18.5336	18.0098	17.8971	18.406	18.5057	19.3301	19.5808	20.0937	20.2137	21.5556	21.0282	22.4318	22.5207	22.5331	22.7829
9	3.80826	3.9521	4.0751	4.29059	4.28286	4.5375	4.74429	4.86494	4.85735	4.85658	4.90569	5.05527	5.14147	5.64981	6.33253	6.32513	7.00363	8.19756	9.34079	10.9356	13.0608	14.4293	14.8737	15.5044	15.8683	15.9671	16.3714	16.3499	16.4821	16.8065	17.4703	18.1463	17.88	17.9019	18.4083	18.7284	18.3522	19.0338	19.2435	19.6709	19.799	20.181	20.7646	21.9075	21.6407	22.5321	22.9697	22.9436	23.1479
10	3.89085	3.98007	4.17195	4.39644	4.57138	4.5501	4.77378	4.8267	4.90842	4.99466	5.05896	5.14505	5.40408	6.24966	6.90486	6.28762	7.30414	8.33071	11.5164	13.3814	13.9478	14.5876	14.9476	15.085	15.9879	16.2876	16.5405	16.4665	16.6739	17.0922	18.0201	18.6593	18.8053	18.8916	18.9584	19.0901	19.3311	19.655	19.5056	19.8949	20.1964	20.7257	21.8775	22.234	22.0691	23.1282	23.2833	24.1236	24.3251
11	3.80826	4.05591	4.09218	4.41937	4.55302	4.64636	4.85638	4.95729	4.90842	5.08719	5.72239	6.21282	6.90052	6.72579	7.77704	7.89055	7.74896	9.1488	12.7083	14.1927	14.4097	15.0926	15.469	15.9899	16.6252	16.5521	16.6976	17.2894	17.2515	17.4003	18.2049	18.9293	19.1949	19.1852	19.4383	19.7871	19.723	19.9727	20.0357	20.5185	20.636	21.6765	22.5959	23.3623	22.8077	24.3345	24.1193	25.153	25.3338
12	4.03681	4.15963	4.15754	4.21866	4.46466	4.66954	4.71953	4.88916	5.05254	5.18434	5.88873	6.63792	8.10301	8.74938	8.45639	9.1231	9.54955	11.4925	11.8166	13.2936	15.1055	15.3954	15.6961	16.0665	17.0086	17.0389	17.1183	17.7872	17.5113	17.7858	18.1479	18.8414	19.4091	19.5445	19.6241	20.2353	19.8716	20.8591	20.0731	20.4973	21.2852	22.6529	23.4293	24.0583	24.5368	25.4354	25.7717	25.5623	25.5169
13	3.80826	4.30942	4.28908	4.30246	4.39356	4.57089	4.7644	4.78169	4.95429	5.26229	5.96581	6.20683	7.86234	10.5201	9.32677	10.1833	11.9028	12.2097	12.1526	14.284	15.4399	15.5612	15.9837	16.618	17.4062	18.0102	17.8404	18.0998	17.899	18.2974	18.2675	18.9791	19.163	19.8449	20.0089	20.161	20.6456	20.8881	20.2934	21.2114	21.8549	23.3744	24.7056	25.5765	25.3291	26.1408	26.879	26.7155	27.0619
14	3.98213	4.03052	4.39749	4.47652	4.43304	4.78169	4.85988	5.05874	5.12728	5.38621	6.28755	6.98637	8.03084	10.296	11.0472	11.2031	13.4952	11.8465	12.8451	14.6281	15.3527	15.851	16.3719	16.7814	17.5135	18.3175	18.1608	18.5155	18.4964	18.513	19.0291	19.2173	19.4191	20.1255	20.8897	20.6955	20.9792	21.0568	21.4792	21.4697	22.6232	23.9264	25.0643	25.0548	26.1079	26.4411	26.9934	27.4006	27.0943
15	4.04869	4.10937	4.40074	4.50839	4.64165	4.82251	4.82097	5.10365	5.25295	5.30167	6.16784	7.41487	8.06805	10.1761	13.5902	13.2948	13.5417	13.0963	13.7003	14.9732	15.6264	16.0429	16.7837	17.1326	17.5118	18.5194	18.9852	19.2193	18.967	19.0177	19.4521	19.7292	19.9173	20.3498	20.9803	20.7214	22.0801	22.4558	22.0449	22.3439	23.3284	24.5965	25.9003	26.2737	25.3009	27.0545	27.3489	27.5478	27.3666
16	4.09619	4.14322	4.29293	4.58036	4.67152	4.78435	4.96024	5.09198	5.47945	5.5552	5.953	6.87405	8.52874	10.6006	13.7419	14.4192	13.9606	14.9171	15.0481	15.4402	15.9341	16.3507	16.9276	17.2824	17.9248	18.5418	19.2731	19.3843	19.4852	19.8743	20.0712	20.162	20.5112	20.5942	21.3526	21.4587	21.8344	22.5021	22.4365	22.5448	23.3909	25.4197	26.4175	27.2287	26.7354	27.1203	27.5369	28.0201	27.7348
17	4.11025	4.10891	4.28425	4.45985	4.66763	4.8064	5.04775	5.2554	5.40535	5.61707	6.05818	8.31273	9.69155	10.9028	13.649	14.5317	14.6956	15.0998	15.839	15.8676	16.2213	16.2833	16.7821	17.3879	18.0599	18.8264	19.4013	19.4652	20.3131	20.4267	20.2296	20.374	20.7688	20.8613	21.1049	21.978	21.9471	22.7341	22.63	22.8432	23.9109	25.4512	27.0981	27.686	27.1723	27.2132	28.1215	28.6117	28.769
18	4.1108	4.17476	4.33077	4.4909	4.51214	4.66959	4.89201	5.10137	5.31975	5.63808	6.85664	9.48937	11.1926	11.1121	13.1094	12.9682	15.5075	15.191	15.9779	16.2194	16.5517	17.1057	16.7649	17.5323	18.0556	19.0391	19.4123	19.9863	20.5059	20.4241	20.4597	20.7493	20.7749	21.0646	21.6291	22.2441	22.3425	22.3236	22.7865	23.694	24.2962	25.2387	27.2148	27.6849	27.7969	28.0566	28.9085	29.2189	29.6356
19	4.06277	4.09602	4.19956	4.52699	4.72456	4.81472	4.76788	5.13449	5.40453	5.78153	7.16739	8.56581	11.6597	11.5152	11.9213	13.0698	15.6616	15.9458	16.2865	16.9729	16.9601	17.2311	17.3528	17.8844	18.5748	18.7026	19.5307	20.2559	20.5192	20.6984	20.9217	21.0975	21.7648	21.6243	21.5792	23.0626	23.2608	23.1023	23.2144	23.6104	24.9415	25.986	27.393	28.1326	28.2712	28.8466	29.9377	30.5755	30.6356
20	4.02925	4.19787	4.22012	4.39766	4.51142	4.75763	4.84309	5.08579	6.00302	6.43028	7.70382	10.0784	10.5083	12.739	12.9628	13.8877	14.9071	16.1984	16.322	16.8312	17.4023	17.6823	17.9388	18.5706	19.045	19.2602	19.8645	20.5835	21.0656	21.1013	21.4493	21.5268	21.788	21.9605	22.111	22.8608	23.2411	23.702	23.4637	24.4569	25.0821	26.3293	27.4007	28.4597	28.7172	29.7125	30.935	31.3932	31.0395
21	4.32449	4.35747	4.66102	4.53041	4.77722	4.9362	5.07012	5.40291	6.25935	7.74661	7.68628	9.43352	10.5167	12.1143	11.9527	13.0851	13.281	16.0808	16.4786	16.7279	17.0994	17.6455	18.0557	18.3331	19.1498	19.7956	19.885	20.5931	21.2092	21.82	21.669	21.8596	21.7459	22.1545	23.0542	23.4655	24.6102	24.4693	24.8667	25.1035	25.5198	25.952	28.0762	28.9134	29.499	30.2961	31.2689	32.0997	31.792
22	4.28589	4.31503	4.50321	4.75547	4.73071	5.00988	5.26109	5.6514	6.20812	7.21328	8.63496	9.77212	11.3114	11.2077	12.7768	14.3673	14.4674	15.6375	16.3419	17.0592	17.0714	17.7049	18.1362	18.4094	19.0296	19.9276	20.2993	21.0405	21.6285	22.1776	21.8636	22.478	21.7695	22.3847	23.0814	23.5844	24.4324	25.4525	25.4884	26.1154	26.4093	27.2434	28.483	29.7629	30.2701	30.8569	31.7458	32.8007	32.2637
23	4.4039	4.76367	4.90047	4.89135	4.93993	5.10814	5.23992	5.96682	7.2369	7.6839	8.80579	9.69883	11.8249	13.2695	13.5323	13.8025	14.9793	15.2294	15.88	16.8561	17.6666	18.1737	18.759	18.8827	19.4822	20.2938	20.5097	21.241	21.5759	22.1506	22.15	22.7099	23.9405	22.8149	23.3679	24.2972	24.492	26.0727	26.19	27.3672	27.3543	27.6595	28.7008	30.8141	31.5662	32.2208	32.842	32.8817	33.7665
24	4.57284	4.71217	4.86605	5.09819	5.09908	5.11285	6.23213	6.76986	8.04257	9.00247	10.6991	11.9709	13.5985	13.8899	14.4157	14.4524	15.1586	15.5923	16.0837	16.8855	17.752	18.1503	18.9659	19.3288	19.8362	20.4166	20.836	21.4229	21.726	22.27	23.593	23.7181	24.1078	23.6167	23.7903	25.0631	24.939	26.0987	26.3938	28.0001	28.3318	29.381	30.7364	32.0283	32.9902	33.0921	33.9323	33.7311	34.7708
25	4.44962	4.84417	4.90963	5.14238	5.21757	5.19365	6.67874	6.69302	7.63422	9.72473	10.5681	11.8721	12.7254	14.4063	13.8949	14.8371	15.2169	15.7929	16.0898	16.7929	17.4611	18.3654	19.514	19.6208	20.6147	21.3406	22.0149	21.8713	22.8069	23.2034	23.933	24.207	24.3671	24.4236	24.681	25.7055	25.8841	26.8988	27.9146	28.7935	30.5983	31.1492	31.4205	33.0199	33.6517	34.3385	34.7416	35.0333	35.688
26	4.40026	4.67498	4.84417	5.11078	5.28672	5.33201	5.74385	6.2682	6.87691	9.184	10.6968	11.5715	11.6508	12.8361	14.4744	14.952	15.8769	16.3548	16.5826	16.7703	17.1804	18.384	19.2139	19.8677	20.7207	21.0104	22.1105	22.2143	22.6594	23.8995	23.8257	24.3238	24.4421	24.4275	24.5603	25.3033	26.0199	27.6888	28.9586	29.6038	31.1988	31.6318	31.9879	33.4018	34.7386	36.0139	36.6957	37.3186	37.6566
27	4.53644	4.8086	4.86745	5.00857	5.39536	5.80448	5.66514	7.12914	7.32627	8.23396	10.2537	11.9035	11.9888	13.6133	14.4886	15.2138	15.7138	16.2453	16.7087	17.1424	17.1681	17.9743	18.7182	19.8075	20.4215	21.1655	22.1581	22.3253	23.3769	25.164	24.9185	24.8561	25.1201	25.1854	25.2235	25.6871	26.6216	28.286	29.9154	30.8609	31.733	33.1095	33.343	34.0101	34.7211	36.3016	37.1556	38.0134	38.6108
28	4.63393	4.85887	4.86997	5.12344	5.5524	5.76775	5.83341	6.42268	7.33883	7.80718	8.40545	9.52569	10.7823	13.0169	14.5201	15.6132	15.7595	16.3851	16.6966	17.0371	17.6826	18.3894	18.6326	19.7452	20.7432	21.2577	21.8921	22.8359	23.4076	25.0456	25.867	25.1029	25.2718	25.944	25.7754	26.4925	27.0219	28.368	31.1797	31.7277	32.5045	34.3671	35.5052	35.1692	35.5265	36.5283	38.8524	39.6062	40.1013
29	4.76922	4.83086	5.05205	5.25267	5.52319	6.20442	7.67007	6.91218	8.44706	9.36125	9.01352	9.7976	12.2611	13.2882	14.9898	15.7548	15.7961	16.21	16.6333	17.3054	17.9139	18.9469	19.1619	19.8317	20.5511	21.0547	21.5652	22.1192	22.7955	23.1688	24.4912	25.4058	24.6153	25.9895	26.2546	26.5867	28.6441	28.9886	31.088	32.9233	34.3411	35.9454	36.4075	36.6875	36.8376	38.0321	39.5739	40.4805	41.4829
30	4.67862	4.77112	5.00023	5.2505	5.71224	5.7319	6.25245	6.251	6.7025	8.27467	9.99381	9.97418	10.8587	12.3591	13.2868	15.9209	14.7857	15.9832	16.6403	17.0892	17.9953	18.7509	19.6438	19.9655	20.4754	21.3584	21.7594	22.3141	22.5459	23.4427	24.8282	25.2858	25.76	26.5666	27.4696	27.5519	28.9043	30.1865	31.4952	33.7339	34.8842	36.1799	37.3781	39.1878	40.027	39.9789	41.102	42.4052	43.0419
31	4.71558	4.80704	5.02901	5.29667	5.52319	5.76185	5.72232	6.28346	6.52223	7.70103	9.53339	9.52061	10.7965	12.0456	13.9879	14.6901	14.5699	15.9537	16.4935	17.1756	18.23	19.1105	19.6473	20.5481	20.502	21.515	22.3324	22.6866	23.1642	23.523	25.0124	25.7393	26.7687	27.5145	28.3913	28.4573	29.3962	31.6472	32.5007	34.3834	35.5934	37.0266	39.001	41.3283	42.4311	42.0857	42.8302	42.9764	43.8923
32	5.00606	5.04104	5.09028	5.2405	5.46431	5.75454	5.80326	6.04947	6.8422	7.71654	8.9383	10.2438	12.4952	13.58	13.8661	14.6814	16.154	16.5812	17.187	17.7003	18.5733	19.0414	19.8668	20.764	21.0129	21.7723	21.7644	22.5487	23.0213	23.7116	24.2793	24.9913	26.4755	27.6269	29.5339	31.0894	32.3663	33.1852	33.8931	34.8892	36.455	37.4316	38.0309	40.471	43.1609	43.1461	43.4141	44.3916	46.0331
33	4.79359	5.04039	5.21883	5.40328	5.55966	5.91911	6.02584	6.16501	7.0967	7.10363	7.94762	10.701	12.2541	13.9468	14.4055	15.53	16.1805	16.8032	17.5927	18.2197	18.9849	19.763	20.4237	20.8689	21.808	22.3967	22.93	22.7279	23.984	24.3804	25.1596	25.5199	26.8802	28.6776	30.604	31.8352	33.2096	34.6758	35.3145	36.3875	37.7168	39.1538	39.7558	41.3054	43.5778	44.9623	44.8923	45.3322	47.1748
34	4.89418	5.29964	5.48606	5.72232	5.61675	5.72232	6.08192	6.35856	6.56589	7.26374	8.11028	8.30634	10.675	12.6629	13.2632	14.3594	16.0253	16.7049	17.6713	18.6879	19.4154	19.7857	20.2132	21.4488	22.1867	22.3692	22.3562	22.6021	24.2434	25.0342	25.1495	26.6078	27.0718	28.8921	30.2845	32.788	34.5872	36.2215	37.5104	38.5989	38.9417	41.1027	40.7636	42.3667	43.7636	44.8883	46.0553	46.8509	47.4729
35	4.80415	5.01582	5.47145	5.68679	5.73946	5.71497	5.68656	5.96955	6.16096	6.84612	7.91813	7.59008	9.52297	11.5675	13.1253	13.3498	16.0082	16.8352	17.7761	18.6596	19.4657	20.0162	20.4599	21.121	22.1883	23.3193	22.966	22.7237	24.1638	25.3576	26.7905	27.1542	28.0079	29.6081	31.0496	34.3976	35.4495	36.6996	37.4402	38.7896	40.4352	42.1627	42.9582	44.6644	45.218	46.6133	47.8887	48.88	49.5885
36	4.7896	4.91608	5.22684	5.31864	5.61763	5.66803	5.69005	5.81708	6.18773	6.69455	7.56412	9.01562	8.72838	10.7542	11.9299	12.6022	13.5311	16.2819	17.3698	18.2989	19.2534	20.1265	20.6543	21.5246	22.0419	22.4249	22.8848	23.2261	24.6052	25.436	27.3193	28.7268	30.5329	30.7618	32.8089	33.8958	35.5802	37.1457	38.2501	39.5058	41.6026	43.0445	45.2608	46.4516	46.6294	48.8355	50.0885	50.7399	52.4602
37	4.78989	4.94593	5.14853	5.35152	5.35475	5.44169	5.70386	6.16953	6.27413	7.29034	7.76283	9.25635	8.62823	10.0996	11.0576	13.2458	13.5792	16.0612	17.3933	18.2867	19.5404	20.5502	21.2128	21.891	22.1268	22.8205	23.8866	24.4273	25.0669	26.1969	27.6848	30.0398	31.1328	31.9923	33.8272	36.123	37.1347	38.9741	40.2265	41.4856	43.9778	45.3332	47.6434	48.9027	49.8353	50.5435	51.7275	52.7308	53.6959
38	4.73957	4.68701	4.93024	5.21249	5.31907	5.63707	5.75636	6.13139	6.65322	7.59736	7.54842	9.11158	9.74321	10.5383	11.5843	13.1955	14.4002	16.2292	17.4879	18.1588	19.2043	20.1332	20.4219	21.3841	22.462	23.9437	24.8994	24.7641	25.6152	27.6231	29.135	30.2071	31.1693	32.1499	34.5176	36.7567	38.5728	40.6129	42.4886	43.2555	46.278	48.0048	48.8538	50.0847	51.7533	53.0924	53.9562	55.2834	55.9417
39	4.50284	4.59695	4.91297	5.17904	5.43178	5.55226	5.80298	6.06237	6.62472	7.10056	7.73924	8.32759	9.72704	10.1694	12.223	14.7195	15.055	15.956	17.0294	17.9383	19.1992	19.621	20.8694	21.8925	23.3296	24.6371	25.5754	26.3081	27.7273	28.6952	30.4364	31.3141	32.6216	34.3801	35.2132	37.4607	39.4137	42.388	42.6867	45.2579	47.4854	49.3167	50.5052	52.4808	53.5062	54.0077	54.9157	56.9505	58.2303
40	4.52338	4.7336	4.83574	5.12646	5.61545	5.72234	5.75541	6.19909	6.52041	7.41153	8.34232	9.22086	11.0403	13.1729	14.4388	15.5462	15.9271	16.4273	17.2463	18.3125	19.2552	20.1677	21.4555	22.1062	23.1059	24.9571	26.8834	28.6996	29.0852	29.3829	31.257	32.608	33.5468	34.93	36.1464	38.5403	41.4451	43.3256	45.4734	47.3324	49.036	50.0627	51.8596	53.223	54.3793	55.6506	56.5334	58.9836	60.7053
41	4.52914	4.94845	5.12164	5.29377	5.52241	5.72903	5.85594	6.13548	6.53854	6.96361	7.59123	8.62952	11.4166	13.1561	15.2448	15.2576	16.3637	16.7638	17.5633	18.4195	19.8561	21.01	22.2639	23.0272	23.8661	25.4722	27.4824	28.1162	29.8391	31.2419	31.9321	33.2986	34.5076	35.5589	37.5253	40.235	42.7328	45.0394	47.3202	48.5911	49.14	50.7494	52.6879	54.5744	56.294	57.048	59.1956	60.227	61.5449
42	4.70495	4.86401	5.11432	5.44089	5.49019	5.59612	5.8233	5.96335	6.46682	6.98641	7.46781	9.66138	11.6083	14.1163	15.5593	16.4022	17.1376	17.0513	17.8262	18.4283	19.9739	21.5527	22.2842	23.9468	24.4864	25.2556	27.1834	28.2004	30.3519	31.3549	31.9267	33.2454	34.4901	36.5526	38.3071	41.9286	43.9425	46.3695	47.7005	49.6976	50.8241	52.4457	54.3933	56.4445	56.9366	57.4793	60.9291	61.7302	61.6519
43	4.70501	4.77352	4.95729	5.23514	5.65584	5.58532	5.75541	6.23928	6.37549	6.88567	7.55516	8.08134	9.88081	13.6629	15.9183	16.2262	17.1517	17.9849	18.115	18.656	19.4929	20.9098	22.7673	23.824	24.1197	24.6082	26.819	28.896	30.5587	31.4441	32.5498	33.2521	35.2862	37.9986	39.6953	41.8464	43.624	46.9637	49.5511	50.9283	52.6439	53.5987	55.8201	57.3967	57.8835	58.7587	61.6417	62.7796	63.3893
44	4.71168	4.72957	5.01634	5.21863	5.46645	5.58985	5.75467	6.37763	6.39756	6.96483	7.85567	8.04576	9.88174	11.6256	14.0615	16.5783	17.1151	17.5542	17.8472	18.4191	19.3393	20.3631	21.5718	23.1975	24.6756	26.1515	27.4758	29.4857	31.2538	33.1926	33.866	34.6971	36.257	38.6514	41.0736	43.5718	45.987	48.9664	51.9913	53.1705	55.3714	56.7176	57.1917	58.753	59.6522	61.2658	62.4507	64.77	65.3166
45	4.7722	4.91188	4.9888	5.41641	5.63963	5.76434	5.91133	6.55022	6.78253	7.18795	8.02581	9.19849	10.4932	12.2347	13.1283	15.1869	16.2992	16.9933	17.8299	18.5852	19.6812	20.3058	21.8993	24.003	25.4393	26.9381	27.9973	29.8906	31.8889	33.3905	34.4545	36.0123	36.7188	38.8123	42.5474	45.1699	47.2594	49.6766	52.3048	55.2751	56.4863	58.4819	59.0833	61.0846	63.2504	63.2661	64.659	65.3683	66.4288
46	4.66157	4.77152	4.86737	4.93017	5.31792	5.67491	6.11753	6.28279	6.65476	7.06264	7.52771	8.80664	10.6824	12.3287	13.1172	14.8254	16.2109	17.2829	18.0336	19.0473	19.6793	20.8889	22.6791	24.3051	26.1078	27.366	28.7493	29.4421	31.3124	33.4142	34.7174	37.0073	38.3448	41.1398	43.217	45.9174	47.7251	50.4975	52.3265	56.6169	58.4916	58.428	60.774	61.9922	63.2704	63.9565	66.1309	66.6351	67.6537
47	4.42944	4.66981	4.93893	5.22182	5.26208	5.84094	6.03343	6.40693	6.55372	6.70199	7.26819	8.52784	9.01091	12.2081	13.3845	15.8403	16.6741	17.2693	18.1338	19.3174	20.225	21.0975	22.4403	24.2914	25.9665	27.3259	28.401	30.0129	31.7544	32.982	35.0653	37.9093	38.9965	41.1707	44.0641	46.2691	49.3688	50.0983	52.7963	56.5642	59.1334	60.5344	61.9363	63.8256	64.19	65.8257	66.1085	66.5464	65.7861
48	4.36026	4.6965	5.07089	5.29201	5.47818	5.63791	5.89541	6.09383	6.23227	6.61372	7.01881	7.84528	8.92202	11.2489	14.0706	15.0885	16.1228	17.1074	17.8946	19.0526	20.5561	21.3208	22.3642	24.6556	25.6023	27.8204	29.1695	30.1744	32.0778	33.746	36.5374	38.0275	39.9784	42.7777	46.2725	48.1262	49.9318	51.1147	53.3924	56.5814	60.9373	63.085	64.1147	64.2268	66.8316	65.1934	66.7832	68.3229	66.6872
49	4.45665	4.63063	4.82974	5.24413	5.53738	5.6738	5.88751	6.08987	6.20218	6.51982	7.13916	8.65387	8.96189	9.0982	12.7521	14.4927	16.7526	17.6201	18.2201	19.2155	20.2199	21.6924	22.4822	23.5198	24.9799	27.3019	29.2525	31.2094	32.7596	34.4848	36.8777	37.9446	41.0167	43.5871	45.8597	48.5762	50.8966	53.3035	55.5602	57.9547	61.4019	64.03	64.988	64.4526	64.9083	65.9217	67.2353	66.6272	66.1205
50	4.66912	4.68093	4.8466	5.10075	5.41784	5.61041	5.85736	5.95429	6.41151	6.54648	7.08136	9.05217	10.9156	10.6149	12.689	15.778	17.0415	17.4326	18.0985	18.9606	20.4837	21.3428	23.148	24.015	25.1506	28.2997	29.4878	31.6486	33.5345	36.2672	37.6233	38.4664	42.3542	44.4387	47.6665	50.7943	52.081	53.5236	57.4996	58.3279	62.0633	64.0493	64.4639	64.6022	66.6123	66.4812	67.6359	66.3667	65.5457
51	4.74892	4.77865	4.96333	5.26153	5.73256	5.9793	6.08354	6.5319	6.352	7.24718	7.8741	9.18681	10.6059	11.6897	12.306	15.6471	15.7561	17.3595	17.9	18.6115	20.2176	21.9359	23.1768	24.1339	25.3333	27.9305	30.0639	31.0923	32.8256	34.9884	37.0432	39.7705	44.2257	46.386	48.0365	51.3479	52.4702	54.3863	58.5323	60.2059	62.4862	64.857	65.6477	66.55	67.2046	66.4876	66.2306	64.605	64.3007
52	4.86907	4.90233	4.99002	5.31441	5.50864	5.79128	6.05302	6.45092	6.97153	7.06313	7.31444	9.0417	10.4957	12.295	13.1007	13.8884	14.858	16.8584	18.6012	19.291	21.4621	22.2582	23.7513	24.4053	25.7312	29.1689	30.1755	31.448	33.1627	35.6852	36.9808	40.2814	44.2176	46.479	47.9979	50.5415	53.2488	54.6118	57.231	60.8372	62.3346	63.6626	65.914	66.7743	67.3554	67.4321	66.447	63.7147	63.8062
53	4.43425	4.7957	4.95849	5.06086	5.30583	5.59614	6.07119	6.57922	7.06384	7.62232	8.17825	8.26296	9.8119	12.257	13.8084	15.1871	15.2079	16.7764	18.3746	19.3937	20.1257	21.4776	22.093	23.9024	26.0248	27.6182	30.3599	32.2439	34.0037	35.8389	37.8717	39.9697	43.1862	46.5441	48.7293	50.5746	52.0146	55.1989	57.8631	60.0512	62.2547	63.4387	65.379	66.9079	67.7948	66.3834	65.9036	65.2589	63.0693
54	4.534	4.54856	4.85411	5.0801	5.16062	5.56426	5.84252	6.53767	7.19467	7.83085	7.83631	8.43848	9.07186	11.4848	13.1133	12.8687	15.718	17.3292	18.0413	19.3307	20.4433	21.905	22.3425	23.6208	26.0261	28.4677	30.4981	31.7514	33.4026	34.7379	36.8278	39.0485	42.6003	45.9013	49.3933	50.6063	52.9766	56.7908	59.5991	61.662	63.0668	64.0586	65.243	66.9181	67.1988	65.6289	65.6969	63.8591	59.8407
55	4.2531	4.65168	4.56489	4.73219	5.06828	5.48123	5.78805	6.02563	6.7001	7.43108	7.85344	8.07284	8.78846	9.96722	12.8187	15.51	16.4847	17.6049	18.2378	19.8169	20.5578	22.4271	23.5746	24.352	26.7335	28.6066	29.8147	31.6948	32.9711	34.7435	36.3137	39.6323	42.6477	45.5242	48.9232	52.5026	54.563	56.757	60.3047	63.1783	62.8925	62.7401	65.2033	66.7109	65.6574	66.5411	64.7695	62.3868	60.5913
56	4.26652	4.48118	4.73552	4.89524	5.10832	5.20139	5.65978	5.88809	6.30573	6.7545	7.42636	8.19919	8.62643	11.0591	13.4355	15.7987	16.9587	17.7391	18.6358	20.2004	21.2086	23.0264	24.5403	24.6896	26.4807	29.0521	29.7003	30.4904	32.455	35.0913	36.4724	39.3799	43.1661	45.9211	49.0324	51.5726	55.5343	58.7896	61.9264	63.3729	63.3715	63.8431	63.6676	65.852	66.0984	65.9417	63.7499	61.5363	59.4356
57	4.24188	4.32505	4.76758	5.01263	5.29815	5.35067	5.6419	5.92359	6.39067	6.70243	7.41794	8.3702	9.13777	11.2163	13.6245	15.6549	16.7716	17.7563	19.1643	20.3628	21.4443	23.2798	23.6438	24.6548	25.9002	27.7017	29.2397	30.913	32.659	35.0709	37.8876	40.1159	44.5486	47.6241	50.4435	53.4282	55.394	57.9375	62.3501	64.8764	64.318	64.8766	65.7199	65.2215	66.6217	66.5219	64.2989	61.1295	57.4906
58	4.19794	4.28938	4.65836	4.95993	5.32336	5.57734	5.81417	5.88053	6.54028	6.73255	8.12347	8.78864	9.73406	11.5178	13.1974	13.6125	16.0261	17.4145	18.2433	19.6991	20.821	22.4454	23.8993	24.7286	25.9043	27.2723	29.1277	30.6878	32.0267	35.5626	37.5308	39.9278	43.6902	47.4915	51.4752	53.8361	56.2935	57.3183	59.8592	62.9798	63.9049	65.5169	65.646	66.6652	66.5853	65.4134	62.695	60.1806	56.5186
59	4.02693	4.41521	4.45249	4.64872	5.0969	5.56753	5.94264	5.95351	6.37027	6.68365	8.63708	9.48099	10.1707	11.4036	12.3251	13.6246	14.4908	15.5794	17.8924	19.5754	20.0582	21.6093	22.6184	24.8726	26.1346	27.1187	29.7609	30.6158	33.5368	35.9112	36.9431	40.071	43.3568	47.5509	50.1752	52.2875	55.6804	57.3756	58.9877	61.778	63.7973	65.5054	65.1647	66.1873	65.7919	64.6075	62.6469	59.2116	55.5708
60	4.09254	4.25333	4.50837	4.56895	4.78214	5.24078	5.61958	5.86407	6.52802	6.86986	7.36479	8.47521	9.68248	9.94951	11.8565	13.435	13.7781	14.7083	17.8281	19.0133	20.0644	21.0658	22.4841	24.2492	26.0501	26.4925	28.1164	30.0445	32.707	35.3921	38.421	40.031	43.9367	46.7738	49.2853	52.1448	55.1807	57.2978	59.6832	62.1386	63.5846	64.6291	64.4094	66.1655	65.5887	64.3331	62.1811	58.2312	55.9247
61	4.31306	4.55346	4.74269	4.85483	5.08102	5.42557	5.80811	6.05274	6.32098	6.93473	7.27712	7.94068	9.17537	10.0608	11.7269	13.5447	14.5873	15.601	17.2946	18.7931	19.4205	20.5559	21.8873	23.0749	25.2861	27.5109	28.3091	29.4453	32.4312	34.0118	38.2309	41.5689	43.4657	45.6205	49.0992	50.932	53.5966	56.3657	59.5667	61.7547	63.9039	65.6217	65.8009	66.4583	65.5163	63.7243	60.6227	58.849	54.7031
62	4.36568	4.47523	4.82092	5.05269	5.18838	5.41588	5.77883	5.94	6.28249	6.98793	7.33646	7.53877	7.75009	7.99809	10.2209	11.3687	13.7368	15.958	16.9301	18.1747	19.3277	19.9515	20.6509	22.6891	24.3495	26.735	27.9815	30.3797	32.4632	34.7151	37.8464	40.9951	44.1199	46.0693	49.0581	51.9246	53.4727	56.7374	60.5618	62.5502	63.8727	65.9516	66.256	65.7687	65.397	63.3478	61.7482	58.0264	53.263
63	4.36325	4.44229	4.80662	5.01779	5.0921	5.16665	5.6243	5.78698	6.05996	6.47774	7.0305	7.31363	7.56737	8.05464	8.25732	10.9092	13.9676	16.2712	17.431	18.5928	19.324	19.7189	21.0295	21.9575	23.8046	24.9711	27.369	29.5575	32.5853	34.3077	36.0895	39.6633	42.9658	45.7717	48.5993	52.2844	52.9661	55.8052	59.3626	62.1551	63.6477	65.8148	65.3702	65.6764	64.2249	62.3381	61.5511	57.8403	55.4723
64	4.23465	4.47126	4.54236	4.9125	5.01519	5.14038	5.54609	5.67408	5.8525	6.13541	6.60579	7.01152	7.55197	7.88316	9.96125	11.1961	14.2789	16.5803	17.2951	18.5518	19.407	19.1141	19.977	21.6366	22.7905	24.5415	26.4239	28.746	31.1975	33.7651	35.7509	38.2603	41.2496	44.3461	47.5489	50.2038	53.3522	55.3011	58.8633	60.6682	62.8797	63.999	64.6083	64.9247	62.9522	62.6506	60.1615	58.9404	56.1956
65	3.77137	4.16623	4.45025	4.44571	4.68123	4.83624	5.08336	5.38323	5.58456	6.01936	6.3845	6.98936	7.20549	7.5544	8.03637	9.9205	13.809	15.4903	16.179	17.1329	18.6061	19.5213	20.2737	21.9346	23.1287	25.2329	27.1941	28.2162	31.1622	33.4925	35.5683	38.6124	40.1516	42.9028	46.9399	49.7687	52.4203	53.6626	56.9648	59.6753	61.4342	63.0743	64.228	65.185	63.2019	62.1424	61.1873	60.5346	57.5268
66	3.70051	3.9399	4.02294	4.17933	4.32807	4.49318	4.66564	5.01991	5.88052	6.0612	6.2105	6.90935	7.58002	7.93471	8.11231	10.4549	12.5807	12.5912	15.3195	15.2872	18.2558	19.5111	20.6067	21.5865	23.5751	24.4535	26.3691	28.1561	30.792	32.8322	35.1397	36.9564	39.9753	43.4303	45.941	49.1405	51.6732	53.4058	56.0608	59.5524	61.6369	61.683	64.2642	65.5765	65.2118	63.4154	61.8697	60.6085	58.1157
67	3.5693	3.65068	3.81915	4.08678	4.40403	4.53317	4.73746	5.20877	5.66296	6.20383	6.20641	6.78751	7.44705	7.97203	8.35529	9.27642	10.9984	12.406	13.9815	15.2659	18.3287	18.8896	19.9846	21.0894	22.9758	24.1381	26.006	27.9418	30.4549	32.0811	34.9212	36.6052	40.3907	44.0909	45.3638	47.8165	49.3321	53.1025	55.6002	58.4801	60.3116	61.1393	62.9902	65.385	64.0613	64.0445	61.6409	59.782	58.9533
68	3.76424	3.78554	3.92886	4.16756	4.5123	4.55341	4.84219	4.99544	5.34585	5.73672	6.32311	6.26093	7.06422	7.4284	7.8328	8.41965	8.83223	10.2833	12.4848	15.6027	17.7373	18.7947	20.0117	20.8888	22.2812	23.8113	26.7105	28.1624	29.1615	31.3134	33.3353	36.0641	38.958	42.501	45.1444	47.2368	49.2108	52.8103	55.3875	58.2551	59.7796	60.2822	62.8951	63.0371	63.3275	63.8891	62.0504	59.8257	57.6735
69	3.34693	3.64462	3.7882	3.98483	4.25608	4.54997	4.73393	4.9487	5.37586	5.60767	6.12473	6.54186	6.86456	7.46626	7.81408	8.4577	9.22008	10.8556	13.2789	16.0227	18.0108	19.238	20.1069	21.994	22.7026	25.1244	26.1947	27.4528	28.7715	30.3103	31.7856	34.9061	37.5099	41.3787	44.0301	46.041	48.3037	50.9605	53.0474	55.7156	57.3009	57.8508	61.6501	62.0989	61.8368	62.7564	61.451	60.3223	58.2979
70	3.27728	3.46552	3.78197	4.02671	4.25922	4.43106	4.64546	4.95729	5.12786	5.67195	6.05843	6.27302	6.99462	7.57531	8.07198	8.50321	9.46582	10.4745	12.7288	15.9354	17.5424	18.9913	20.4918	21.6821	22.4619	23.4957	24.3999	26.3774	27.6139	29.468	31.5656	34.8709	37.0186	40.53	41.9094	44.5316	47.2987	49.644	51.7701	54.0027	57.1419	59.0915	60.6253	60.8074	61.2071	62.1483	61.9441	60.7548	58.9896
71	3.08433	3.16018	3.48828	3.81942	4.06682	4.31133	4.55675	4.88551	5.17243	5.53828	6.07367	6.26145	6.99885	7.40275	8.0642	8.34796	8.75221	9.12532	10.8666	13.8461	15.7297	17.6091	19.8394	21.1099	22.2317	22.9947	24.7973	26.2637	27.4477	29.3419	31.1602	34.4508	36.8046	39.1094	41.2142	43.6274	45.7836	47.3198	50.4774	53.6218	55.5374	58.2308	58.669	60.3109	62.2638	62.4736	62.5816	61.9696	60.9876
72	3.01047	3.09123	3.14095	3.57287	3.86835	4.24764	4.74935	4.94585	5.459	5.61634	6.24128	6.59166	7.17436	7.7171	7.93852	8.37734	8.42558	9.83913	10.9409	12.7029	15.3844	17.1789	18.8475	20.03	21.5835	22.537	24.2024	26.2721	27.0085	28.218	30.0647	32.8784	35.1774	37.9882	40.498	42.8095	43.9971	45.8185	48.992	52.2141	53.4064	56.1983	57.7932	59.3365	60.8133	61.6138	62.4792	61.3118	59.9181
73	3.09073	3.2442	3.59195	3.54014	3.88523	4.31133	4.8439	5.07785	5.23132	5.51571	6.02297	6.68526	7.41345	7.65866	7.86296	8.04643	8.17381	9.13165	9.75922	10.6229	13.1183	15.429	18.3535	19.448	20.3938	21.1862	23.11	25.1497	26.0781	27.4684	29.7824	32.5478	33.8326	37.0706	39.3519	40.52	42.1806	45.2175	47.3936	49.3955	51.5955	54.0755	56.1249	57.3858	59.0951	60.1173	60.7607	60.7781	60.3897
74	2.75673	3.3681	3.48912	3.90079	4.15548	4.89436	5.01087	5.10924	5.12399	5.41701	5.74332	6.23316	6.56505	7.29751	7.5785	7.71052	8.3701	8.66127	9.36285	10.1593	12.6501	14.6888	17.9317	19.2092	20.1432	20.983	22.7416	24.0854	26.1178	27.0616	29.8048	31.8477	32.7183	35.2806	37.7652	38.8233	39.8967	43.9067	45.6527	47.7086	50.6075	53.205	53.8188	55.081	56.1288	58.7177	59.4443	58.5966	58.818
75	3.08075	3.25279	3.55497	3.73419	4.13581	4.52443	4.95475	5.15166	5.25841	5.48581	5.9108	6.37306	6.78046	7.08366	7.30136	7.75726	8.26222	8.67937	9.44542	11.7385	13.2193	14.8378	16.4898	18.7629	18.8253	20.0674	21.1685	22.7841	24.9803	25.8555	28.7136	30.1574	31.5708	33.5123	35.7623	37.0698	39.3147	42.33	44.8928	47.5337	49.335	50.6627	52.4742	52.4999	53.2308	56.1552	57.9823	57.5315	58.4773
76	2.826	3.21017	3.3681	3.57619	3.93107	4.01741	4.84395	5.01373	5.29106	5.42752	5.85625	6.30832	6.92969	6.94986	7.2807	7.35791	7.83032	8.15527	9.06462	10.5112	12.0308	12.3905	14.3908	16.352	17.3299	18.6844	20.7101	22.3296	23.7404	26.0874	26.9425	28.9872	29.9818	31.0707	32.9794	34.5534	37.9056	41.3535	43.4962	46.1397	48.5807	50.1451	51.7308	52.4157	52.5218	54.2755	56.7228	58.3874	58.6774
77	2.71266	2.99578	3.10213	3.32176	4.07131	3.86034	4.21338	4.85861	5.01166	5.34399	5.28875	5.95856	6.46386	6.78824	6.80369	6.98869	7.36748	7.85717	8.19051	9.09194	10.4628	10.7179	10.5095	12.1077	16.4207	17.5153	20.6132	21.5348	22.9592	25.4312	26.2497	26.859	28.9453	29.7245	31.5005	33.8859	36.2231	38.9486	41.1129	42.7943	45.1816	48.4194	49.0884	52.6449	52.8234	54.0735	55.7013	56.6298	56.8698
78	2.36619	2.4527	2.88883	2.82989	3.18079	3.60151	4.01416	4.33621	4.97516	5.05723	5.13054	5.31297	5.70659	6.10516	6.5044	6.77859	7.09737	7.78389	8.16317	8.77655	9.30624	9.79858	10.6829	10.7101	13.9813	17.0227	19.4743	20.7197	22.2353	24.2722	25.6944	25.6681	27.3963	28.485	30.8153	32.6765	33.966	35.59	38.0703	40.5743	42.8434	46.7396	47.7626	50.3909	51.883	52.6967	54.1158	54.0481	54.9407
79	1.91917	2.22364	2.20149	2.57562	3.0267	3.36895	3.71564	4.25378	4.7619	4.99334	5.11514	5.27067	5.41529	5.95404	6.10833	6.80569	7.3468	7.57361	8.27399	8.76117	8.90108	9.73439	11.8989	13.4561	15.3689	16.3331	16.942	19.5386	20.7207	22.1812	24.0321	25.5111	27.3919	28.968	29.5023	30.9852	32.1166	34.2694	36.2901	38.1266	41.68	44.7261	46.0428	47.7806	48.8404	50.3618	52.0097	51.4239	52.596
80	1.63523	1.88577	1.97518	2.22364	2.83979	3.2764	4.02434	4.20599	4.23499	4.67728	5.33227	5.32393	5.58291	5.72745	6.08947	6.68001	7.26567	7.82662	8.19393	8.42606	8.82245	9.24739	11.1733	12.6033	13.5167	16.1438	15.4897	19.0525	20.2295	20.9765	22.8163	25.1045	26.0679	27.8377	28.742	29.5922	30.8414	32.5725	34.5169	37.1089	40.2561	42.5234	43.6565	44.1981	46.0724	47.0818	48.9545	49.3784	49.9211
81	1.67973	2.00816	2.22461	2.35624	2.88528	3.35136	3.64379	4.20916	4.12172	4.67053	5.31698	5.31698	5.41916	5.85188	5.84585	5.91365	6.67902	7.58773	7.84166	8.17548	8.49159	9.37788	9.73082	12.1059	14.2805	15.1207	15.9675	17.6194	17.609	19.8044	21.1052	23.3603	25.4662	26.4629	27.7623	27.917	29.1131	31.6366	33.3179	34.5261	36.5982	39.1756	40.6527	41.4091	43.9782	45.0318	46.2249	47.135	48.5135
82	1.43496	1.6712	1.84336	2.34828	2.7	3.06001	3.67707	3.69061	3.99429	4.1496	4.78264	5.2621	5.31165	5.71174	6.11658	6.68193	6.82562	7.51959	7.86345	8.42943	8.65454	9.38408	10.6976	12.038	13.8185	13.1393	14.2982	16.313	17.4425	19.163	20.5853	21.6503	23.9855	24.2895	26.8895	27.7071	28.1015	31.2571	32.2883	33.5558	34.284	36.9433	38.7663	40.0856	41.041	42.1132	43.5348	44.9838	46.5016
83	1.32018	1.35623	1.68999	1.85546	2.22944	2.52975	2.84115	3.23572	3.8943	4.18817	4.26267	4.78581	5.12807	5.76025	5.98784	6.2906	6.62632	6.98228	7.44778	7.99436	8.55519	8.72391	9.23233	10.1554	11.3822	12.8132	13.6885	15.394	16.7637	18.3315	19.5094	21.0028	21.6805	23.6028	24.721	26.8719	27.4056	29.4658	30.7571	31.5623	33.0238	35.7707	36.5272	36.983	38.8856	39.8151	41.9572	43.3899	44.641
84	0.983375	1.3063	1.4946	1.47876	1.81606	2.27057	2.76125	2.82792	3.56722	3.91241	3.99729	4.33496	4.54328	5.06114	5.53671	5.84894	6.0729	6.53514	6.71972	6.9568	7.83807	8.08177	8.76324	8.9479	10.01	11.1668	12.3994	13.1668	14.1838	15.8552	17.7892	19.4371	20.3648	22.3828	23.8127	24.9605	27.1573	28.5436	29.3254	29.9812	31.0495	33.6223	34.2295	34.6336	36.3315	37.1874	39.3909	41.045	42.9283
85	0.641638	0.212291	0.943134	1.70584	1.88749	2.28998	2.87224	2.97224	3.13607	3.90556	4.11208	4.0581	4.26988	4.54328	5.08032	5.57028	5.92035	6.01085	6.39499	6.74941	7.1661	7.57766	8.40743	9.06994	10.1579	10.9249	10.6383	12.6504	13.6343	13.9668	14.4721	16.4748	18.9678	20.7514	23.0778	23.9607	26.7898	27.7888	28.1619	29.4504	29.8347	30.9123	31.4242	32.9801	35.1363	35.3313	36.723	38.3596	39.63
86	0.149738	0.987532	1.19489	1.64483	1.74292	2.079	2.29748	2.64086	2.99735	3.50376	4.12162	4.16246	4.24614	4.61955	5.27823	5.78858	5.92323	6.35098	6.68634	6.96412	7.26262	7.63889	8.18773	8.89861	9.12203	9.56831	9.55825	10.5365	12.5782	12.8835	14.0303	16.5379	19.2651	20.183	22.0857	23.6736	24.0453	25.0938	25.7218	27.1668	28.2274	28.8205	29.7618	31.7458	33.8681	34.5288	34.8563	35.6141	36.1803
87	0.358121	0.610752	0.62225	1.09293	1.54283	1.89025	2.0872	2.58715	2.50236	3.04948	3.46637	3.93417	4.11854	4.43061	4.95363	5.34318	5.84585	6.05562	6.3864	6.81045	6.99296	7.531	8.14766	8.34236	8.61323	9.05841	9.37489	9.40186	10.5701	12.7392	13.9789	16.0661	18.9925	19.3479	20.8868	21.154	22.4505	23.9083	25.3136	25.7009	26.0247	27.0728	28.6649	30.0374	31.4665	32.0474	32.065	33.7057	33.3754
88	0.206489	0.192693	0.254172	0.25973	1.26491	1.60004	1.96278	1.99288	2.53732	2.65031	3.14391	3.31896	3.842	3.94517	4.56347	5.15223	5.45936	5.73869	6.05787	6.13905	6.59682	7.10185	7.56894	7.77057	8.16929	8.33181	8.55666	9.65714	10.3123	11.4642	12.9361	14.919	15.753	17.9399	18.4365	19.6266	20.1891	21.8952	23.3175	24.2426	24.7915	24.8308	26.1717	26.2475	27.0861	27.9396	30.5173	32.3211	32.0918
89	0	0	0.156917	0.495193	0.937979	1.81399	1.82426	1.90303	2.41598	2.42854	2.78923	2.78537	3.12212	3.7909	4.2556	4.70327	4.9773	5.11629	5.90608	5.9319	5.98753	6.33608	7.06556	7.35518	7.53729	7.61571	8.04156	8.67154	9.22715	9.83255	10.8201	11.0865	12.1893	14.007	15.451	18.0548	18.1602	20.4668	21.4181	22.8227	22.8362	23.3782	25.0239	24.588	25.3432	25.9891	28.8895	30.7021	29.9999
90	0	0.05382	0.604525	0.688767	1.16659	1.4347	1.83503	1.80239	2.14191	2.09454	2.55509	2.84041	2.84913	3.4422	4.233	4.90308	5.06332	5.43827	5.78086	5.75754	6.05753	6.22561	6.60463	7.00898	7.35391	7.30283	7.92974	8.10596	8.44641	8.79197	8.8494	9.38909	10.0921	10.4819	11.7785	15.0409	17.1349	19.1557	20.1574	20.4359	20.6048	21.1021	22.6803	22.4148	22.8865	24.8956	26.2084	27.2075	27.0494
91	0.0088186	3.97215e-05	0.450676	0.722956	1.10924	1.34391	1.65138	1.25808	1.79598	2.12147	2.77223	2.82425	2.88696	3.3594	3.86155	4.64288	5.01757	5.45669	5.32649	5.49129	6.06308	6.28371	6.12101	6.7278	7.26956	7.1374	6.8718	7.40002	8.06607	8.12915	8.24924	8.62619	9.83255	10.3077	11.5147	11.9802	14.1128	15.3186	16.7878	18.0153	19.3915	18.7298	20.8495	21.3788	21.3226	22.5023	24.1722	25.4688	25.0968
92	1.00388	1.24391	1.26413	1.04381	0.726308	1.40467	1.48788	1.26496	1.70469	2.10285	2.76566	2.73073	2.7747	3.28898	3.49905	3.85738	4.43447	4.85509	5.24589	5.29092	5.70031	5.93714	6.05819	6.16436	6.39513	6.4785	7.02062	7.29129	7.83086	7.83086	8.04841	8.26538	9.14249	10.6252	12.3508	13.1577	12.4175	12.5361	15.3248	16.6555	15.0745	17.5387	18.9282	19.1177	21.3408	21.0988	22.4332	23.2256	23.5032
93	1.26394	0.98865	1.08397	0.331646	0.760983	1.33011	1.41113	2.01956	2.2554	2.09148	2.7025	3.0048	3.19019	3.02087	2.88696	3.39139	3.72903	4.01415	4.72266	4.76708	5.54416	6.00501	6.05506	5.93263	6.08688	6.50167	7.0698	7.39823	7.47703	7.87085	7.87077	8.48619	8.93419	11.1918	11.9673	10.9839	10.826	10.6371	12.575	13.359	14.3826	15.0203	17.5673	19.1832	20.7123	21.2533	21.7788	22.5402	21.9844
94	0.747231	0.62508	0.11294	0.169984	0.773311	1.32718	1.52608	1.71536	1.78989	2.17119	2.79059	2.88041	2.7506	2.83001	2.94448	2.87705	3.12947	3.90159	4.36436	4.48112	5.23061	5.45774	5.77788	5.61763	5.84166	6.20407	6.85796	6.71339	7.43793	7.4982	7.81626	8.19533	8.46658	9.27348	9.45946	9.93145	10.1274	9.77286	11.5275	11.6194	12.6402	12.3311	13.5006	16.5801	17.8427	18.9957	19.7832	20.909	21.208
95	0.00203966	0.130448	0.0175531	0.0112207	0.0647665	0.134879	1.30462	1.73451	2.07058	2.0748	2.11374	2.5474	2.74597	2.78069	2.81184	2.89211	2.8948	3.69522	3.91416	4.43093	4.83213	5.29822	5.3875	5.51776	5.80397	5.94396	6.3151	6.32502	6.63461	7.30934	7.89878	8.05318	8.37076	8.78874	9.37109	9.59332	9.36976	9.68034	10.522	10.7171	11.0989	11.54	11.4602	15.921	14.1536	14.8712	16.203	18.4236	18.8463
96	0	0	0	0	0	0.0997902	0.413271	1.08168	1.95771	2.0748	2.08962	2.18527	2.53127	2.98685	2.88527	2.862	2.76407	3.24742	3.85936	4.08609	4.32525	4.35882	4.93069	5.25247	5.57054	5.6604	5.74081	5.8009	6.68012	7.40306	7.75693	7.68189	7.71042	8.24048	9.14317	8.99531	9.52213	9.70725	9.83524	9.55026	10.0748	10.7244	10.5395	12.7465	12.7229	12.2638	13.7687	16.0202	16.5097
97	0	0	0	0	0	0.0979146	0.321778	0.634058	1.17745	1.85595	1.87624	1.96413	2.12695	2.43619	2.39108	2.7693	2.862	3.17457	3.31707	3.53561	4.28054	4.28718	4.65426	4.85408	5.14096	5.30134	5.32166	5.64865	6.26617	7.23612	7.6382	7.15429	7.53865	7.83185	8.15631	8.33791	8.89588	8.94956	9.00872	9.39005	9.39746	9.97535	9.99606	11.1801	11.1651	10.8915	12.2316	14.6751	13.9836
98	0	0	0	0	0.028786	0.199314	0.783553	0.95849	1.156	1.68566	1.77814	1.29321	1.69456	1.95771	2.11396	2.34205	2.85755	3.0641	3.15756	3.28435	3.80893	4.21676	4.24459	4.47178	4.83687	4.91815	4.86276	5.15224	5.77423	6.95051	7.47501	7.41915	7.00808	7.5875	8.06435	8.51848	8.08822	8.88837	9.12545	9.00252	9.44127	9.86262	9.93835	10.1341	10.9047	11.1542	11.3138	12.2955	12.4532
99	0	0	0	0	0.00154594	0.561238	0.884175	1.51163	1.69359	1.51715	1.97161	2.0748	2.32315	1.95771	2.06898	2.10713	2.72824	2.61476	3.00443	3.2307	3.48946	3.80068	4.09602	3.96726	4.36001	4.71081	4.54526	4.98277	5.84932	6.92989	7.09412	6.9808	7.36659	7.24088	7.59004	7.744	8.13288	8.46512	8.81913	8.30162	8.65666	9.21574	9.5272	9.83174	10.3195	10.2828	10.629	10.3839	10.4628
100	0	0	0	0.0865309	0.161684	0.417478	1.3982	1.32751	1.68483	1.50983	1.87247	2.34713	1.9121	2.31491	2.18752	1.89863	2.42209	2.90513	3.08088	3.21121	3.45891	3.63497	3.67117	3.72015	4.10349	4.18149	4.92005	5.46027	5.59831	6.72966	6.5877	6.64532	6.60737	7.06141	6.67192	7.03614	7.66576	7.76356	7.73097	7.62152	7.88865	8.12072	8.66856	9.60296	9.51181	9.60441	9.80717	9.90103	10.0337
101	0	0	0.00740981	0.314588	0.718499	0.767361	0.701881	1.09401	1.65665	1.89148	1.71467	1.93299	2.34409	2.17655	2.25387	2.42209	2.42209	2.64879	2.52932	3.28734	3.42799	3.51731	3.61332	3.83649	3.81454	4.45223	4.71537	4.92599	5.52243	6.24243	5.68011	6.08569	6.28858	6.6014	6.54612	7.15024	6.82638	7.22383	7.16756	6.78238	7.28543	6.97962	7.73744	8.99708	9.29683	9.23906	9.3058	9.40058	9.45586
102	0	0	0.0190477	0.0793328	0	0.0114046	0.0419161	0.231562	0.371288	1.2422	1.37058	1.98142	2.20855	2.0231	2.09605	2.1468	1.95887	2.14916	2.3375	2.87832	3.18638	3.27709	3.18877	3.77954	3.98277	3.85419	4.01967	4.30849	4.87656	5.16445	5.08156	5.27781	5.37139	5.92265	6.47902	6.80054	6.68375	6.25242	6.68633	6.59613	6.58152	6.81004	7.39167	7.8801	8.51676	8.15045	8.96502	9.25572	9.36872
103	0	0	0	0	0.000115122	0	0	0.0929966	0.400967	0.977965	1.79862	1.91673	1.92394	1.63351	1.88007	1.88212	2.05297	1.79205	2.04908	2.2519	2.3997	3.03448	3.03619	2.86666	3.38632	3.464	3.49463	3.92321	4.27374	4.46414	4.79732	4.6509	5.04114	5.76922	6.03635	5.84585	5.79968	5.92189	6.24216	6.2417	6.46138	6.82548	7.33104	7.65833	8.19715	8.43306	9.02155	9.0253	9.43805
104	0	0	0	0	0	0	0.0675232	0.338604	0.534701	1.03835	0.699236	1.23823	0.857409	1.66936	1.71817	1.77294	2.1986	1.84514	1.88006	1.69011	1.91976	2.49835	2.52852	2.15968	2.86202	3.05812	3.47907	3.56063	4.06189	4.2123	4.01945	4.27826	4.47037	4.76508	5.01659	4.90371	5.10872	5.5576	6.05601	6.24943	6.24216	7.05544	7.12156	7.46969	7.46969	8.32706	8.36239	8.42553	8.60682
105	0	0	0	0	0	0	0	0	9.38779e-06	0.37397	0.174144	0.895797	1.587	1.03186	1.54196	2.4264	2.23704	1.90601	2.34169	2.0214	1.73258	1.81588	1.72024	2.34278	2.6281	2.84156	3.0075	3.30458	3.62361	3.82091	4.41733	4.17828	4.41236	4.08828	4.32847	4.57641	4.94204	4.98438	5.71151	5.66541	6.25182	6.13113	6.8181	7.19062	7.05725	7.7884	7.75549	8.25663	8.24411
106	0	0	0	0	0	0	0	0	0.00525119	0.372979	0.286331	1.07904	0.402425	0.83435	1.57581	1.79222	1.8618	1.38694	1.99529	2.29799	1.89235	2.41001	2.19878	2.56513	2.59361	2.41428	2.85521	2.99093	3.74859	3.6612	3.94691	3.67781	3.92126	4.08112	4.14117	4.98944	5.33071	5.18471	5.25862	5.93554	5.8334	5.95658	6.62064	7.52104	6.84539	6.79912	7.04816	8.27042	8.17736
107	0	0	0	0	0	0	0	0	0.0815235	0.0218624	0.168542	0.126956	0.739787	1.38717	0.681075	0.736867	0.909356	2.05416	2.73441	2.57688	2.72125	2.43326	1.83188	2.29758	2.24993	1.93855	1.49216	2.89647	2.89333	2.96801	3.18448	3.34728	3.35825	3.46397	3.86859	4.50062	5.20516	5.24542	5.70418	5.52746	5.6694	5.55569	6.54224	7.00333	6.46233	6.33791	7.18858	7.86145	7.96095
108	0	0	0	0	0	0	0	0	0	0.0165981	0.19903	0.704938	0.613785	0.729091	0.0565673	0.726447	1.33528	1.41666	1.76408	2.04313	2.28856	2.81859	3.06465	2.73349	2.60029	1.37459	1.6473	1.60937	2.2469	2.50512	3.09001	2.45353	2.83531	3.41613	3.84187	4.52973	5.30552	5.07417	4.82796	5.17314	5.1276	5.02407	5.77133	6.37467	6.37489	5.93489	6.62668	7.20829	7.90527
109	0	0	0	0	0	0	0	0	0	0.0081869	0.385295	1.38717	0.176311	0.218885	0.862752	0.964704	1.72309	2.01175	2.0303	2.49359	3.22194	3.0609	3.27019	3.06874	2.30644	2.0163	1.44714	0.780685	2.14656	2.0872	2.59005	2.80999	2.66722	2.87892	3.39836	4.14696	5.1212	4.84219	4.84219	4.74011	4.79726	3.95859	4.9206	5.30936	5.60082	5.60468	5.87584	6.71078	6.88671
110	0	0	0	0	0	0	0	0	0.0720466	0.742419	0.281033	0.576184	0.403027	0.180724	0.080203	0.0468503	1.54382	1.53812	1.12575	2.46269	2.89408	3.04428	3.2103	3.00107	3.35035	2.08995	0.633727	0.351145	0.969755	1.92638	2.18535	3.07548	3.31005	3.68667	3.39896	3.97684	3.94368	4.56052	3.82501	4.94469	3.79098	3.51663	3.91693	4.23479	4.70364	5.13744	5.90406	6.64969	5.87621
111	0.137692	0	0	0	0	0	0	0.158674	1.03839	0.864139	0.0621616	0.434661	0.117925	0.00949645	0.0614686	0.213439	0.710386	1.08634	0.882771	1.91505	2.91717	3.33444	3.30728	3.22244	3.27815	2.08026	1.36067	0.621313	1.05115	2.11034	2.9284	3.37275	2.71651	3.43198	4.10992	3.70564	3.28839	4.17525	3.64118	4.08254	3.77811	2.97814	3.19932	3.6931	4.84219	5.01648	5.33383	5.01087	5.13544
112	0.482548	0	0	0	0	0	0.0022951	0.0613196	0.409997	0.13175	0.25164	0.314446	0	0	0	0.609101	0.628651	1.28561	1.69869	1.86383	2.55114	3.34655	3.3553	3.99272	2.9599	1.68864	0.709244	1.15291	1.87284	2.80152	3.63903	2.65936	2.22413	3.71137	3.07324	2.38247	2.76046	3.43504	3.54457	3.21041	2.44101	2.0838	1.93194	2.81217	3.56058	4.55888	4.92186	4.69605	4.14326
113	0.0620453	0	0.00102693	0	0.00217513	0.536723	0.299592	0.0258236	0	0.00504588	0.180691	0.0408166	0	0	0	0.594305	0.943845	0.91703	2.67561	2.51118	2.87932	3.58274	3.70744	4.01866	3.81868	1.84931	1.09335	1.56488	1.82524	2.8235	2.8914	2.47912	2.78606	2.51779	2.35216	3.1191	2.97371	2.86562	3.39896	3.50099	3.19852	1.72354	1.06751	1.68597	2.15352	3.1853	4.95729	4.30928	2.6258
114	0	0.418288	0.123174	0.0699427	0.383107	0.879591	0.89026	0.370116	0.138841	0.0838081	0.0770949	0	0.00243993	0.0347751	0.623408	1.47517	0.662514	1.86583	1.84193	2.72884	2.61158	3.24169	3.06724	3.64109	3.21585	2.95096	2.56138	1.79437	2.16342	2.04376	2.20164	1.88076	1.6081	0.810999	2.11995	2.41844	2.70836	3.28098	3.50599	3.65709	3.06286	1.21804	1.54606	2.39656	1.87696	3.96162	4.56446	3.92567	1.94349
115	1.07611e-05	0.77114	0.0928466	0.529527	0.97805	0.835313	0.972498	0.612731	0.277124	0.130553	0	0	0	0.00057107	0.336046	2.16248	1.55139	1.69592	2.54706	1.85103	1.55139	2.53533	3.0202	2.48439	3.46544	3.10368	2.39544	2.49932	0.949239	1.3768	1.40285	1.93866	1.01989	0.340286	1.91952	1.88801	1.79925	2.65814	3.42535	3.68131	1.85004	1.11665	1.95359	2.08035	2.64232	2.94765	3.12569	3.42096	3.18662
116	1.16434	0.087114	0.256638	1.16838	1.58661	0.2512	0.292284	0.427207	0.000673102	0.0515143	0.400718	0.142501	0.0695058	0.349496	1.66649	1.55139	1.45421	1.77165	1.83417	1.81731	1.14149	2.00603	2.60911	2.40647	3.1019	2.67053	1.83823	1.46152	1.11515	1.40526	1.13236	0.542272	0.566234	0.334494	1.1267	1.44266	1.4903	1.00736	2.82003	2.25835	1.31326	1.17383	1.00774	0.837672	1.47943	2.92452	3.23941	3.41518	3.04707
117	1.15887	0.79913	1.13745	1.18919	0.681181	0.379656	0.286515	0.00787547	0.276733	0.477615	0.404148	1.62832	1.55139	0.613082	1.43496	1.61857	1.55139	1.85103	1.80324	0.0679417	1.6899	1.19672	2.16566	1.75717	1.50665	2.30234	1.88363	1.5881	1.70008	1.65615	0.225139	0.376008	0.0522772	0.514306	0.310191	0.179588	0.246685	0.0756393	0.960953	0.98122	0.849307	0.378444	0.0750173	0.250647	0.881631	1.77389	2.6751	3.2124	2.07342
118	1.0949	1.17431	0.581334	0	0.129323	0.262372	0.15176	0.110069	0.137075	0.737315	1.51264	1.82098	1.79873	1.21403	1.02534	1.13468	2.20461	1.87485	1.26995	0.651782	1.85103	0.423339	1.04218	0.915493	1.0102	1.73547	1.50103	2.42376	1.40423	0.0895147	0.306735	0.0457089	0	0	0	0.00629828	0.000818512	0.0850737	0.0435102	0.141114	0.453405	0.100278	0	0.0234987	1.17175	2.33425	3.88322	3.70778	1.7276
119	1.54196	0.255234	0.0855106	0.000870633	0	0.520414	1.62453	0.341689	0.419677	1.17606	1.21889	1.15574	0.588192	2.08485	1.97004	1.27616	1.78018	1.87216	1.08989	1.08043	0.903009	0.236356	0.260862	0.388871	0.394784	2.09769	1.11574	1.26917	0.506836	1.44007	0.0619908	0	0	0	0	0	0	0.0371319	0	0.504291	0.29091	0	0	0.00351621	1.46669	2.40201	3.48074	3.95722	1.8514
[truncated: 71 more columns]
