# Supplementary material for: Unexpected long-term variations of Saturn’s ring current revealed by energetic neutral atom imaging
Source: Research Square preprint supplement (doi:10.21203/rs.3.rs-3271171/v1), 2023-09-18
Supplement: Supplementary file 16 [file ac6472588a8bdbba073cf711.xlsx]

## Sheet: Sheet1
Fig. 1b
			Energy Density
	Local Time (hr)		2007		2008		2009		2013		2016
	12		50.4746		38.6438		41.0593		14.3832		24.7023
	12.2		50.4746		39.5009		39.1439		14.1556		25.9525
	12.4		51.6291		39.5825		40.3952		13.617		26.6927
	12.6		51.9403		37.1653		39.1347		13.7145		27.9399
	12.8		50.1932		37.1482		38.4538		13.6422		27.9567
	13		49.9273		35.9417		39.4866		13.4676		27.6192
	13.2		51.0761		33.4937		40.358		13.872		28.1925
	13.4		51.5291		32.4447		39.274		13.5872		28.7225
	13.6		50.2675		30.5765		39.8798		13.4965		29.3621
	13.8		51.4656		30.1237		37.8632		13.809		29.1687
	14		50.8578		32.2298		38.0565		14.0095		30.2143
	14.2		51.3005		28.2822		38.2072		14.0438		32.1872
	14.4		51.5725		30.1262		38.4065		15.2072		32.6552
	14.6		52.6189		28.2745		40.3481		15.2072		32.8395
	14.8		52.6446		29.0314		41.0132		15.1583		32.8565
	15		53.7188		27.7147		41.9748		16.5402		32.9176
	15.2		53.8265		31.4215		41.7313		17.0428		35.0084
	15.4		56.2366		29.8682		42.6968		18.1291		36.4537
	15.6		56.4053		28.1358		44.4464		18.1291		36.5699
	15.8		56.7163		28.7244		43.6655		18.5905		36.1445
	16		55.4371		30.108		44.4229		19.3122		37.1855
	16.2		55.8822		31.2445		44.0185		19.4116		37.7569
	16.4		56.6247		31.82		46.687		19.8827		38.5832
	16.6		57.3667		32.1458		46.4599		20.584		40.137
	16.8		57.0473		34.4118		46.8897		20.956		40.4371
	17		60.3151		33.1222		48.3562		21.2505		41.0722
	17.2		59.2229		36.6373		49.9906		22.0546		41.5315
	17.4		60.9801		37.4148		49.5721		22.7225		42.1966
	17.6		61.976		38.4239		50.0028		22.767		41.9385
	17.8		62.2641		39.4387		52.3186		23.2771		42.6069
	18		62.2641		39.0368		51.7092		24.348		43.751
	18.2		61.6282		43.938		52.9451		25.0283		44.1457
	18.4		63.1971		43.948		53.2881		25.9779		45.5479
	18.6		64.2292		44.5963		55.2012		26.036		46.3958
	18.8		67.5007		45.9192		55.0721		26.9386		46.7837
	19		67.6107		45.7829		56.955		26.3368		46.3147
	19.2		66.5793		50.1382		57.141		26.1356		47.7161
	19.4		68.7241		50.4389		57.9484		26.9441		47.6668
	19.6		69.1854		49.6566		58.3368		26.3776		48.0772
	19.8		68.6545		51.0282		59.1219		27.0663		48.2533
	20		70.2748		53.8974		59.1219		27.214		48.318
	20.2		71.6409		53.8391		59.6921		27.271		50.7898
	20.4		73.4351		55.921		61.1553		27.2802		51.8659
	20.6		73.2788		56.7599		61.3078		27.2802		52.3738
	20.8		75.3012		56.8627		62.0886		28.4259		54.0014
	21		75.3012		56.9295		61.7824		27.9268		53.1992
	21.2		72.8863		56.8415		62.9633		27.5465		54.928
	21.4		75.7502		60.5167		63.2029		27.9116		53.1474
	21.6		74.9455		60.0455		63.2854		27.9116		53.4195
	21.8		74.7786		59.1692		64.1546		28.5075		54.5644
	22		74.6378		58.8489		63.9805		28.7138		54.4776
	22.2		74.7578		59.2936		65.1291		28.3318		54.9973
	22.4		76.9151		59.7745		63.3021		28.0497		55.1524
	22.6		76.6993		60.366		65.059		27.6666		56.7639
	22.8		76.8597		61.0612		64.1264		27.9566		57.4689
	23		77.3607		62.4664		66.1151		28.5104		56.6717
	23.2		74.5305		62.888		66.6285		27.7117		57.978
	23.4		73.9455		61.9571		67.5402		26.64		57.9131
	23.6		74.1145		62.018		67.8391		26.6632		59.0609
	23.8		74.5886		62.14		68.2854		26.7632		58.006
	24		74.5886		62.7534		68.1048		27.4545		58.2732
	0.2		75.9379		65.9019		68.491		26.0268		57.2678
	0.4		75.2451		66.8879		68.7215		25.858		58.1377
	0.6		75.1735		66.7601		68.1095		26.2713		58.3318
	0.8		75.4086		66.0715		67.8931		26.1138		57.4034
	1		76.5073		66.6257		68.4998		26.373		59.0365
	1.2		77.7602		68.7605		67.8408		26.1548		58.252
	1.4		78.6302		66.3465		68.7293		26.3846		59.3663
	1.6		77.4495		66.2636		69.2836		25.1332		58.0464
	1.8		76.1403		68.2142		69.3214		25.0471		58.3689
	2		76.4906		70.3693		69.3214		24.7204		56.8654
	2.2		77.7429		68.7595		69.2939		24.8406		54.5126
	2.4		76.1887		69.2977		69.9498		24.9186		54.6146
	2.6		76.0634		69.4098		69.9505		24.9186		53.0326
	2.8		74.5324		68.0328		69.2599		23.5926		52.7903
	3		73.675		70.1586		68.3151		23.7397		51.9344
	3.2		74.9147		70.2682		69.456		23.1871		51.0107
	3.4		72.4644		72.0257		69.2766		22.8389		49.6878
	3.6		69.2135		72.5906		68.2375		22.8389		50.1707
	3.8		69.8205		73.4074		68.7957		22.1743		49.1353
	4		69.694		73.0885		67.5761		22.9354		46.9737
	4.2		69.8643		71.5266		68.4175		22.0365		46.273
	4.4		69.1584		70.0547		67.8387		22.0726		44.6793
	4.6		70.1739		71.2805		66.845		21.6522		43.1305
	4.8		68.8603		72.3472		67.3758		21.5449		42.6432
	5		67.9758		70.4358		67.1744		21.3605		40.6432
	5.2		68.7791		70.3376		67.4023		20.6561		40.2909
	5.4		67.2971		71.9459		66.1469		21.2929		41.288
	5.6		65.3438		70.0119		65.9028		21.0121		40.313
	5.8		62.9516		68.8242		64.2888		21.1817		39.4871
	6		61.8314		67.1443		64.4335		20.0903		37.8892
	6.2		61.8314		68.3008		62.6925		19.4906		36.9424
	6.4		62.9887		69.201		62.7176		19.4687		37.1477
	6.6		64.2549		67.9311		62.1827		19.4995		35.5384
	6.8		61.8567		67.2657		60.8583		19.3736		34.7516
	7		62.4893		64.6446		59.2528		19.0144		32.9233
	7.2		61.4423		64.0462		58.6064		18.6842		32.3529
	7.4		60.7828		61.8347		57.8551		18.3495		31.3182
	7.6		58.2047		60.7023		59.2916		18.1317		30.8307
	7.8		59.4006		60.0665		58.1952		17.9052		30.322
	8		58.4809		60.4625		57.615		17.433		29.2824
	8.2		57.9156		59.4583		56.8485		17.4776		28.9639
	8.4		56.9264		58.5134		56.635		17.8937		28.65
	8.6		58.6976		58.261		55.1959		17.8937		27.5564
	8.8		57.606		58.1351		53.4128		16.9925		27.5708
	9		56.8177		57.8964		53.2912		16.4837		27.6834
	9.2		56.8177		57.4833		51.3892		15.701		26.7238
	9.4		57.117		56.9546		51.6408		15.8846		26.2307
	9.6		56.2291		54.6128		51.1281		15.8846		25.7439
	9.8		56.7831		54.918		50.1635		14.662		25.5786
	10		55.6754		55.6459		47.4536		14.7669		25.7527
	10.2		55.7353		51.9126		47.4536		14.5812		25.6918
	10.4		54.3518		49.3127		47.1447		14.6234		24.4831
	10.6		55.1357		48.7889		45.8053		14.5669		25.1986
	10.8		52.5464		47.6315		45.8576		14.2579		24.6724
	11		51.075		46.5943		44.385		14.298		24.6551
	11.2		50.7963		45.384		43.0184		13.9827		24.1745
	11.4		51.3292		45.1454		43.0395		14.27		24.6128
	11.6		51.274		43.5439		42.0189		13.7594		24.7303
	11.8		51.295		42.176		40.8848		13.9599		24.5677
	12		51.295		39.6276		42.104		13.8416		24.5985
