# Supplementary material for: Unexpected long-term variations of Saturn’s ring current revealed by energetic neutral atom imaging
Source: Research Square preprint supplement (doi:10.21203/rs.3.rs-3271171/v1), 2023-09-18
Supplement: Supplementary file 17 [file b486bea699813caa021f4a2e.xlsx]

## Sheet: Fig. 1a_2009
	0	1	2	3	4	5	6	7	8	9	10	11	12	13	14	15	16	17	18	19	20	21	22	23	24	25	26	27	28	29	30	31	32	33	34	35	36	37	38	39	40	41	42	43	44	45	46	47	48
0	4.09614	4.17317	4.30744	4.4502	4.54744	4.62902	4.52841	4.65782	4.75449	4.74592	4.91661	4.90491	5.08442	5.26886	5.46599	5.72637	5.50482	5.57565	5.73694	6.56093	6.49667	8.13785	9.38846	9.58745	7.47563	7.5165	7.94584	9.56261	10.5371	11.0251	10.403	10.9361	12.2316	13.7075	14.3083	13.9425	14.8442	15.1546	15.3746	15.6465	16.1213	15.6289	15.7624	16.1911	16.7085	16.7274	17.0563	16.7463	16.1084
1	4.03858	4.30798	4.27351	4.39263	4.4986	4.68038	4.66516	4.70923	5.00942	4.95443	4.96491	5.21696	5.11386	5.4512	5.52624	5.74258	5.62189	5.7229	5.92191	6.99782	7.89134	8.6828	10.6325	11.3741	9.68203	9.67917	10.2827	9.37779	11.6133	12.2485	12.1841	12.8152	12.9949	14.7871	14.7844	15.0074	15.5464	15.5596	16.1202	16.4307	16.2276	16.2568	16.2644	16.5845	16.8955	16.9785	17.0786	17.0699	16.3866
2	4.06946	4.24392	4.42197	4.39184	4.49233	4.64767	4.72768	4.81314	4.77416	5.12002	5.2366	5.37388	5.33661	5.64749	5.53547	5.76682	5.73373	5.96346	6.26691	6.44101	8.74525	9.24487	10.7819	11.9831	11.7158	11.1629	11.2166	12.1565	12.7822	13.9028	13.4434	12.8945	13.4205	14.7315	15.2487	15.4943	15.7232	16.3861	16.6731	16.863	16.8195	16.723	16.8258	17.3329	17.3377	17.7349	17.5231	17.2961	17.0192
3	4.2046	4.28306	4.48758	4.69373	4.72793	4.84077	4.85619	4.87297	5.00603	5.27164	5.31999	5.99758	6.06797	5.61775	5.86135	5.82628	5.93843	6.05268	6.70349	7.19975	7.64434	10.6432	11.285	12.7419	12.3985	13.5326	12.8699	13.7949	14.1789	14.9509	14.5679	14.7884	14.6106	15.1732	15.5152	15.606	16.7231	16.8401	17.4741	17.7315	17.3876	17.3789	17.2576	17.2992	17.7249	18.1063	18.333	17.8115	17.4299
4	4.25744	4.34489	4.4556	4.70819	4.79821	4.79397	4.85735	4.91585	4.96631	5.1581	5.52121	5.58981	7.34002	6.59682	6.82327	6.82345	7.68155	7.1094	7.29445	7.43646	8.19378	10.1851	12.695	13.4085	14.2398	14.2779	14.1495	14.7059	14.2916	14.8018	15.3639	15.4098	15.6568	15.2561	15.6384	15.9733	17.1209	17.3293	17.9071	18.4303	18.1643	17.7197	18.0199	17.967	18.3645	18.4557	19.2883	18.662	18.0347
5	4.30904	4.39651	4.43767	4.71053	4.91396	4.94332	4.95197	4.99943	5.15867	5.24934	5.33705	5.70937	7.21457	7.18291	7.35379	7.99838	8.90118	8.39816	8.21613	8.83632	9.03009	10.2579	12.8388	14.2086	14.7189	14.9031	15.4119	15.3522	15.2894	15.2418	15.8139	15.578	15.8417	16.3438	16.5698	16.1854	17.3679	17.9117	17.9794	19.0992	18.8844	18.6355	19.5032	19.2867	18.8201	19.4532	19.8682	19.3958	18.6466
6	4.2625	4.39478	4.54369	4.74737	4.90653	5.21753	5.2342	5.14999	4.96822	5.2181	5.25578	5.53023	6.51905	7.0671	7.67911	7.95478	8.51234	9.64945	8.59362	9.65822	9.22416	10.1753	12.9665	14.4342	14.849	15.149	15.2433	15.1972	15.7079	15.7838	16.3449	16.2417	16.5005	16.741	17.2742	16.8307	17.5671	18.6129	18.3962	19.2174	19.5021	19.2505	19.6903	20.1196	19.867	20.2288	20.4118	20.3506	19.8072
7	4.28157	4.51724	4.60901	4.80403	4.92766	5.09972	5.29715	5.26244	5.40912	5.33531	5.40994	5.60169	6.22157	7.91583	7.68725	8.92917	8.70502	9.34085	10.0567	11.0903	10.6663	11.2219	13.4798	14.6687	14.9905	15.8364	15.8994	15.7528	15.9925	16.4347	16.6658	16.8257	17.0631	17.4089	17.9556	17.6876	17.6946	18.4304	18.7005	19.4097	19.5585	19.7618	20.5447	20.6687	20.2541	21.2474	21.1052	20.6251	20.4036
8	4.35474	4.39426	4.54708	4.85214	4.90842	5.03513	5.28247	5.45726	5.44552	5.51743	5.58517	5.66331	6.14075	7.80171	8.334	9.53751	9.96407	9.74837	10.6835	11.6738	12.3309	13.514	13.8134	15.1062	15.9336	16.285	16.446	16.4071	16.1317	16.9569	17.5475	17.5707	17.5536	17.8322	18.6867	18.1411	18.3433	18.6102	18.9293	19.8982	20.1341	20.1761	20.5928	21.5934	21.2362	22.3254	22.0166	21.805	21.838
9	4.39468	4.49936	4.66639	4.90902	4.95729	5.09021	5.41881	5.68512	5.60963	5.69285	5.79668	6.26721	6.37029	7.17493	8.06619	9.55181	10.2111	9.5283	10.9257	12.1582	13.3154	14.5885	14.7949	15.4838	16.1322	16.4929	16.8632	16.782	16.7987	17.319	18.4194	18.2864	18.1549	18.5665	18.708	19.0437	18.6085	19.2702	19.6676	19.922	20.0682	20.4708	21.0286	21.8694	22.0699	22.745	22.6292	22.6319	22.842
10	4.46861	4.51717	4.62551	4.97595	5.08463	5.2565	5.34608	5.68825	6.47486	6.58837	6.47839	6.91805	7.1719	7.51874	8.70209	9.13976	9.9124	11.9118	12.8471	14.1949	14.646	15.1518	15.6708	15.3158	16.2508	16.5862	16.9614	16.7997	17.1397	17.723	18.9378	19.1842	19.196	19.3388	19.3497	19.3643	19.6736	20.1055	20.0557	20.6598	20.707	21.0489	21.9172	22.564	22.6151	23.7773	23.5799	23.7581	24.0774
11	4.64165	4.64165	4.68825	4.80806	5.26737	5.3668	5.57934	5.80867	6.35777	7.22662	8.25002	8.66244	8.70937	8.02816	8.96851	9.59957	10.9398	10.9365	14.0545	15.416	15.6425	15.8547	16.1392	16.4957	17.0859	16.9462	17.1797	17.4647	17.8239	18.2046	19.0348	19.4524	19.8522	20.0115	19.9187	19.856	19.7977	20.2882	20.4236	21.2015	21.6351	22.1427	22.5971	23.3384	23.0906	24.768	24.5048	24.9387	25.1334
12	4.80167	4.80032	4.80581	4.85074	5.24963	5.47657	5.69598	5.72225	6.23572	7.31262	8.77834	9.13025	11.5292	10.2796	9.99364	10.9394	11.1679	13.185	13.4616	14.5996	15.9988	16.2841	16.6197	16.9806	17.6123	17.775	17.9579	18.1031	17.8933	18.1412	19.0973	19.7565	20.1015	20.2788	20.5005	20.3596	19.9907	20.8039	20.3	21.4519	22.01	22.9279	23.2955	23.9469	24.4907	25.0248	25.3259	24.9909	25.6451
13	4.79139	4.93037	5.02837	5.00999	5.14016	5.50164	5.69598	5.93508	6.30006	6.85273	8.54289	8.43534	10.2093	12.03	10.8949	11.5334	12.8136	13.0104	13.2999	15.0302	15.8348	16.4385	16.9541	17.5203	18.2444	18.7431	18.5776	18.6889	18.6779	18.6534	19.1828	19.8085	20.2703	20.4532	20.7266	20.6093	20.8726	21.2374	20.5351	21.7652	22.7486	23.978	24.354	25.1672	25.2313	25.718	26.5513	26.5118	26.7223
14	4.76377	4.90834	5.19408	5.25625	5.24729	5.56925	5.71831	6.05315	6.37358	7.70903	9.5302	10.4625	9.68429	11.6194	12.6402	13.2691	14.2154	13.0364	14.2274	14.6562	15.9377	16.6884	17.0106	17.3964	18.2418	19.0448	19.0538	19.3339	19.332	19.244	19.7415	20.0331	20.3703	20.8235	21.3799	21.4268	21.3685	21.482	21.1557	21.4714	23.1985	24.5995	25.327	25.1158	26.4482	26.6717	26.3777	26.9209	27.2234
15	4.72622	4.90768	5.08332	5.48403	5.45336	5.56731	5.73376	5.94085	6.31457	7.21991	9.90412	11.8268	11.137	12.1164	14.1696	14.0758	14.7663	15.0335	14.8426	16.0186	16.127	16.6137	17.3484	17.734	18.2152	19.2194	19.8743	20.0583	20.1459	19.8987	20.2866	20.8871	20.8267	20.8221	21.8594	21.496	22.2893	22.645	21.8826	22.828	23.679	24.9584	26.3452	26.504	26.0319	27.4503	27.7808	27.2215	27.3853
16	4.89319	4.90795	5.2776	5.59667	5.63952	5.7229	5.84197	5.93797	6.3321	6.78212	8.29638	10.2787	12.0493	12.6141	13.9305	15.1749	14.5361	15.4197	16.1563	16.2509	16.7971	17.1603	17.6664	18.0651	18.7392	19.4509	20.2549	20.5032	20.947	20.9863	20.7723	20.9954	21.2615	21.2778	22.2567	21.858	22.0933	22.9143	22.3312	22.8297	23.7521	25.6391	26.6028	27.1883	26.9979	27.3209	28.0838	28.5264	27.9853
17	4.90768	4.90846	5.07778	5.31358	5.78586	5.90632	6.30865	6.55764	6.39032	7.72762	8.62275	10.524	12.4008	12.7211	14.3488	15.0927	15.524	15.7134	16.3315	16.6937	17.0766	16.9295	17.6752	18.2817	18.94	19.7458	20.2483	20.7266	21.5319	21.4655	21.0651	21.1296	21.6884	21.556	21.7419	22.3751	22.2727	22.6979	22.6981	22.951	24.0247	25.6696	27.0868	27.4647	27.1207	27.2828	28.4049	28.9491	28.5561
18	4.86628	5.04392	5.04117	5.30551	5.66886	5.72078	5.98366	7.08009	6.73455	7.77043	9.13014	11.8787	13.6915	13.8395	13.8212	14.2933	16.1499	16.2953	16.7135	16.9655	17.4807	17.7403	17.9056	18.3606	19.0033	19.682	20.6429	21.2184	21.6207	21.6659	21.4296	21.8273	21.5209	21.3877	21.7906	22.156	22.479	22.6268	22.9006	23.6576	24.264	25.6067	26.907	27.6507	27.7732	27.9484	29.212	29.7388	29.922
19	4.80451	5.00129	5.16852	5.50172	5.629	5.87156	5.97291	6.22063	7.04488	8.21136	10.673	11.2927	13.3194	13.2772	13.5305	14.1862	16.0984	16.7608	16.8612	17.716	17.8111	18.0288	18.283	18.6505	19.303	19.6895	20.8043	21.3632	21.759	22.1549	22.1274	22.1374	22.8436	22.3769	21.9066	22.469	22.9636	23.2625	23.741	23.9545	24.5167	25.4614	26.3522	28.0802	28.1356	28.6495	29.5119	30.3591	30.5234
20	4.87066	5.00423	5.11603	5.2099	5.89613	6.01646	5.98539	6.58759	9.0715	9.82289	11.7438	13.1973	13.7937	14.6895	15.1429	15.378	15.9387	16.9095	17.2904	17.6998	18.1049	18.6836	19.1369	19.5765	19.7778	19.8378	20.8289	21.8409	22.1785	22.5327	23.0492	23.3866	23.1023	23.2502	22.7147	22.9549	23.2785	23.7955	24.0215	24.5308	24.775	25.3997	26.4087	28.1741	28.5412	29.2785	30.1918	31.244	31.1084
21	5.04496	5.10937	5.27322	5.19215	5.81888	6.64852	7.64406	7.78363	8.95424	10.7858	11.1618	12.2932	14.0546	14.1808	14.8135	15.9237	16.0586	16.9943	17.4777	17.522	18.0108	18.6574	19.0766	19.7006	20.4167	20.7464	20.8406	21.7224	22.5115	23.3333	23.0114	23.6617	22.8539	24.1541	24.1106	24.5512	25.1719	24.6631	24.8429	25.3963	25.5978	26.0182	27.2052	28.5075	29.7079	29.812	30.9793	31.8753	31.6993
22	5.01421	5.20148	5.32875	5.51688	5.55901	7.25848	7.93316	8.86276	9.84334	11.9472	12.218	12.2115	14.8912	14.8208	14.7556	15.939	16.2467	16.8042	17.4384	18.0797	17.9791	18.6299	19.2539	19.3348	20.1617	21.0606	21.2876	21.9798	23.27	23.8126	23.9193	23.9887	23.0987	23.9045	24.9391	25.0646	25.2549	25.8661	26.2596	26.4616	26.4796	26.7412	27.5259	29.5966	30.4459	30.8392	31.3022	32.3682	32.3876
23	5.2522	5.33633	5.40644	5.54523	6.11599	6.66164	7.69484	9.7338	9.77978	11.146	11.1425	12.6058	14.4406	14.7867	15.245	15.8818	16.6087	16.7992	17.3745	18.2035	18.4211	18.9181	19.6682	19.9709	20.4414	21.1527	21.6073	22.3038	23.0573	23.9379	24.2463	25.0522	25.7667	24.6023	24.4015	25.5171	26.2094	26.6711	27.2905	27.6796	27.6723	27.3877	28.0227	30.4261	31.6586	31.7745	32.6919	32.7047	33.1491
24	5.18398	5.31575	5.61459	5.90215	6.7149	8.65189	10.3977	9.99403	11.7755	12.6418	13.9897	14.8826	14.9257	15.6764	15.7158	15.7736	16.6145	17.0374	17.2875	18.2437	19.2613	19.8024	20.2649	20.398	21.205	21.4499	21.7485	22.8056	23.2149	23.9968	24.9885	25.8906	25.8011	25.8935	25.2375	26.2577	26.2322	27.5616	27.799	28.6879	28.4793	29.3708	29.0865	31.4486	32.2256	32.7938	33.5299	33.3395	34.0815
25	5.37176	5.45982	5.61083	5.93504	6.77826	7.21335	9.57421	10.8863	12.2224	13.2306	13.3644	14.0014	15.2253	15.4226	15.8381	16.316	16.7397	17.024	17.622	18.5244	19.362	20.3951	20.837	21.0193	21.7674	22.2015	22.8044	23.0744	23.6561	24.3504	25.7212	25.4272	25.7977	25.7794	26.0537	26.8178	26.9302	28.4588	28.8456	29.4137	30.7012	30.6329	30.6906	32.5733	33.3991	34.0205	34.7359	35.0943	35.4854
26	5.49032	5.47422	5.51415	6.32368	6.81134	7.46935	8.19007	10.7028	10.0229	12.272	14.0484	13.5366	14.6746	15.301	16.1258	16.1584	17.0542	17.2784	17.8469	18.5018	19.4692	20.5887	20.867	21.6428	22.3285	22.8993	23.3526	23.9009	23.944	25.1014	25.8503	26.068	25.9858	26.081	25.6424	26.1848	26.854	28.3144	29.7544	30.8127	31.2653	31.6491	31.2214	32.8708	34.0823	35.5342	36.6868	37.5879	37.2159
27	5.50666	5.61038	5.70502	6.2032	7.15996	8.55098	9.46223	10.3523	10.8183	10.9455	12.3054	14.2401	13.6893	15.6518	16.4248	16.5822	16.8459	17.3745	17.6255	18.7074	19.4397	20.5222	20.9799	21.7583	22.3854	23.5414	24.2588	24.4733	24.8713	25.9625	26.5442	26.5153	26.6709	26.9628	27.1198	27.1984	27.5851	29.2669	30.5548	31.4425	32.3446	33.3601	33.3872	33.5145	33.864	35.8543	36.9356	37.9652	38.658
28	5.55066	5.7275	5.76548	6.49328	7.03493	8.21462	8.54567	9.52951	11.3313	10.8862	11.2345	13.2305	13.0065	14.1349	16.1269	17.0949	17.3555	17.5472	17.7239	18.5937	19.7066	20.8895	21.2991	21.8998	22.7905	23.0794	23.9852	25.0256	25.4509	27.1105	27.1435	26.8432	27.1248	27.5282	27.7438	28.318	27.9905	29.8809	32.1012	32.8277	32.7755	34.4588	35.6592	35.0064	35.1092	36.1974	38.4526	40.1323	40.0735
29	5.46015	5.62244	5.92839	5.86959	6.60808	8.23547	10.3308	9.9713	10.4514	12.2248	12.1538	11.8894	13.6773	14.03	16.1646	17.0436	17.4858	17.7732	18.548	19.2787	19.8151	20.6639	21.3988	22.0446	23.025	23.4795	23.4141	24.1479	24.7048	25.4642	26.8961	27.2201	26.8348	28.1571	29.1419	29.1545	30.2092	30.403	31.9468	33.9651	34.2387	35.8926	36.3536	37.0724	37.6811	38.3478	39.0817	40.3435	41.3652
30	5.44696	5.49247	5.76689	6.02601	6.45336	7.60458	9.02503	9.3463	10.2729	11.3629	12.3122	13.0515	13.1248	14.8172	15.0409	17.1576	16.6989	17.3939	18.2792	18.974	19.8497	20.6817	21.6938	22.0762	22.7789	23.6598	24.2313	24.8696	24.8739	25.63	26.6314	26.9052	27.7486	28.8256	30.2188	30.4459	31.0823	32.0124	33.4241	34.8722	35.3292	36.8325	37.4178	39.2782	40.4642	40.1297	41.0709	42.3907	43.035
31	5.57932	5.65956	5.74822	6.23685	6.35751	6.66514	7.24149	8.11871	8.45535	10.5349	12.724	12.9592	14.1737	14.4139	15.1668	16.3496	16.5126	17.3124	18.195	19.4189	19.9037	21.248	21.9578	22.5835	23.0089	24.3422	24.6552	25.2223	25.6095	25.9684	26.3143	27.4037	28.6542	29.5667	31.2698	31.6725	31.8683	33.563	34.9253	35.8527	36.2195	37.5956	39.3579	41.0318	42.2878	42.525	43.0783	43.3986	44.3776
32	5.73023	5.72882	5.73371	5.95276	6.4026	7.19674	7.70847	7.98181	8.60293	9.6779	11.4218	13.9036	15.4167	16.0582	16.2517	16.6319	17.5788	18.0526	18.7454	19.7638	20.462	21.0801	21.9289	22.4999	23.0576	23.8862	24.1609	25.195	25.6745	26.3592	26.6477	27.1628	28.6456	29.592	31.6704	33.4976	34.0957	35.1671	35.3751	37.0401	37.2911	38.7095	38.4847	41.1395	43.8631	43.5566	43.7591	45.0716	46.6012
33	5.69494	5.76001	5.91333	6.15778	6.29587	7.75848	7.87414	9.33428	9.763	10.3209	11.5662	13.5926	14.8277	16.0637	16.3336	17.3011	17.846	18.3942	18.9944	20.3476	20.5898	21.4495	22.1146	22.7528	23.4251	24.576	25.0993	25.6633	26.4998	26.9031	27.5138	27.4182	28.5757	30.2984	32.692	34.2333	35.4291	37.2197	37.7313	38.0672	39.1313	40.4346	40.875	42.7095	44.6398	45.8471	46.5071	46.8959	48.3441
34	5.91686	6.13801	6.13064	7.02323	6.7126	7.86984	8.58628	9.59249	10.3627	10.8718	11.5183	12.2126	13.2489	15.7877	16.3431	17.0321	17.936	18.676	19.2039	20.3474	21.269	21.6334	22.1741	23.6661	24.6032	24.9048	25.5179	25.9461	27.4938	28.491	28.499	28.7845	29.075	31.465	32.764	34.9227	37.1579	39.0282	39.3417	40.295	40.9197	42.5048	43.0154	43.8915	46.1322	46.8995	48.1	48.625	49.5191
35	5.78669	6.31485	7.2493	7.97236	7.62051	7.2304	8.16349	9.71804	10.0229	10.5953	11.4072	13.2679	13.3346	16.0695	16.7578	17.2404	18.0718	18.7599	19.5383	20.4498	21.7137	22.1213	22.6691	23.6933	24.4861	25.234	25.702	26.0424	27.9823	28.842	30.4459	30.5874	31.2728	32.5105	33.7481	36.1041	37.7999	39.9496	40.5365	41.9547	43.4054	44.6882	45.2821	46.8417	48.0597	48.9444	49.7213	51.5711	52.0807
36	5.78664	6.05352	6.5658	7.47517	7.93002	7.41784	7.88055	8.38673	10.2809	10.7813	12.1998	13.2021	14.0372	15.8573	17.037	17.273	17.6418	18.7082	19.751	20.3524	21.431	22.3427	22.6721	23.4191	24.5152	24.9582	25.7096	26.0477	28.2334	29.1058	31.5025	32.2438	33.5182	33.9652	35.67	37.0579	38.8025	40.3286	42.1418	42.5489	44.5882	46.7439	47.7036	49.1437	49.7308	50.7313	52.6203	53.416	55.168
37	5.85826	6.00353	6.21855	7.3381	8.38098	9.14285	8.2987	10.0973	11.2346	11.6398	13.3603	13.6877	14.439	15.5364	16.4608	17.3845	18.1525	18.7932	19.6607	20.7398	21.4065	22.5172	23.5127	24.2909	25.2131	25.9029	26.7529	27.2616	29.4866	30.4963	31.6148	33.5253	34.8876	35.5975	37.2949	39.1256	40.1347	42.8378	44.2255	45.3152	47.0976	48.2181	49.7734	50.8741	52.2754	53.2071	53.9626	55.3765	56.3361
38	5.62632	6.03455	6.25162	7.07643	9.04395	9.82974	10.3141	10.3185	11.6898	12.6501	13.4776	15.3165	14.8529	15.9188	17.0097	17.4904	18.2398	18.6208	19.4919	20.8178	21.5543	22.2961	22.9676	24.5987	25.8333	27.3108	28.1301	28.5097	30.1329	32.2823	33.0267	34.0794	35.0837	36.3643	38.312	40.0575	42.4243	44.1071	46.266	46.8088	49.3635	50.6317	51.6102	52.6446	54.1292	55.0413	56.9081	57.5459	58.6364
39	5.73562	5.82031	6.07286	7.32051	8.93436	9.496	10.2787	11.0653	11.4652	12.9009	14.7079	15.4983	16.42	16.9066	17.3643	18.2166	18.5157	19.2297	19.653	20.2736	21.6022	22.6889	23.6747	25.065	26.5217	27.9537	29.1496	30.3235	31.6357	32.6883	33.8771	35.1834	36.2291	37.2088	39.5985	41.3448	43.2561	45.9603	47.2561	49.4586	51.3269	52.6155	53.619	55.115	56.0179	56.5253	58.4833	60.8324	61.7132
40	5.79128	5.95095	6.46372	7.52104	9.11749	9.56349	9.59561	10.4679	11.3557	12.4526	13.8721	15.7095	16.983	17.3376	17.7112	18.2553	19.0167	19.361	20.3479	21.5453	22.2945	22.9127	24.975	26.0059	27.0455	28.8044	30.2676	31.5906	32.6105	33.905	35.4697	36.4969	37.3553	38.2937	40.4548	43.0885	46.1772	47.6063	49.7627	52.5477	52.8354	54.6314	54.9561	56.4615	57.7786	60.7045	61.268	62.9638	64.2268
41	5.77572	6.29145	6.17608	6.75798	7.77274	10.3237	9.99014	10.7068	11.0171	12.1936	13.656	15.599	16.7979	17.3987	17.934	18.4937	19.0508	19.7216	20.3088	21.3495	22.7743	24.0529	25.2259	26.16	27.1445	28.2538	30.794	31.7962	32.998	34.4845	36.1338	37.5735	39.4909	40.0325	41.9016	44.3083	46.8941	49.0983	51.427	53.1437	53.3849	55.5926	56.2337	59.4218	60.0806	62.3652	63.7762	64.2574	66.8021
42	5.74087	6.09228	6.25681	6.5724	7.32958	9.10039	8.7389	10.0034	11.6542	12.6902	14.0283	15.6294	16.6994	17.9093	18.4468	19.1641	19.5532	19.6963	20.9067	21.7973	23.4077	24.8387	26.0144	27.2483	27.7451	28.1838	30.8307	32.5513	33.941	34.8391	36.3055	37.4437	39.5179	40.7569	43.7962	46.8879	47.8828	50.4967	52.9131	54.9549	55.4892	56.8951	58.7386	60.452	61.666	63.3286	65.2896	65.9573	67.1439
43	5.80785	5.95782	6.35667	6.9026	7.27867	9.10403	11.1255	10.8046	10.8539	12.5548	12.9685	14.2844	16.887	17.7422	18.8048	18.8476	19.9959	20.4097	21.2517	22.1338	23.0449	24.6299	25.8985	27.1028	27.6357	28.662	30.7907	33.2136	34.5531	35.0798	36.3697	38.039	40.2888	42.8779	44.5918	47.7047	48.4444	52.2222	53.9806	56.1151	57.4984	58.6994	59.6808	62.7236	63.3931	65.25	66.635	68.0349	68.2375
44	5.99933	5.92192	6.54814	7.53001	8.68693	10.4099	11.2246	12.2758	12.379	14.5049	14.8021	14.6912	16.3985	17.4274	18.3759	19.2368	19.8875	20.3902	21.0041	22.1021	23.1084	24.8387	25.6455	27.1122	28.0731	29.8605	31.4973	33.4422	35.1879	37.0895	38.6597	39.7732	41.458	43.6004	46.1113	48.4926	51.1646	53.4579	55.9719	57.6971	59.9095	61.3291	61.7594	63.5099	65.5463	66.3383	67.9885	69.2766	70.1988
45	5.95429	6.10613	6.10045	7.10151	9.28103	9.45825	10.5697	12.6835	14.1478	13.5484	15.8716	16.2706	16.382	17.2212	18.0659	18.7298	19.6147	20.616	21.854	22.5835	23.6484	24.9299	26.2417	27.7387	29.1218	30.7159	31.782	34.1179	36.1395	38.4574	39.8168	41.8731	42.8853	44.6354	47.1934	49.4923	51.5109	54.941	57.0093	60.192	61.6534	62.8901	63.7754	65.4235	67.9024	68.3151	69.456	70.5469	70.8055
46	5.97984	6.31659	6.43033	6.85892	7.87168	9.51262	9.9889	12.0421	14.6615	14.0988	15.7391	15.979	16.6402	17.264	17.5544	18.3669	19.3777	21.0014	21.7778	22.2192	23.6051	25.3698	27.4974	29.0545	29.8491	31.3623	33.3619	34.2791	36.2626	39.1923	41.3143	42.756	44.2827	45.8	47.5537	49.7427	53.5303	55.7647	57.4496	61.2369	63.0759	63.8716	65.4964	66.6598	68.3642	69.2599	71.4633	71.7162	72.0712
47	5.74283	6.11843	6.49162	6.44586	7.59719	7.87501	8.87692	11.0373	12.0966	13.8072	14.1505	15.7283	16.5416	17.5589	17.6029	18.32	19.3324	20.1693	21.3851	22.8231	23.8832	25.1259	26.5326	28.7695	30.1372	31.6084	32.9409	34.4309	35.4777	38.7177	41.0528	44.2084	44.9596	46.0446	48.8728	51.5516	54.5468	56.1289	58.6325	61.4424	64.5298	65.5392	66.7724	68.5198	69.9505	70.7136	71.873	72.0924	70.6116
48	5.94624	6.1808	6.64731	6.60583	6.86134	8.11536	8.65545	8.77322	9.98261	11.0742	13.8794	15.4474	16.5893	17.1082	18.0649	18.2346	19.4942	20.0906	21.3001	22.9112	24.2686	25.5416	26.9695	28.6812	29.8935	32.4307	33.4794	34.9565	36.7699	38.9555	41.622	43.3019	45.9229	47.9572	50.7314	52.836	55.5653	57.5008	58.9342	62.4149	64.5155	67.3679	68.7287	69.9498	73.0076	72.1644	71.8104	72.2581	70.9156
49	5.94473	6.03233	6.32374	6.7133	6.7527	7.53666	8.01375	9.01416	10.1831	11.6363	13.1889	16.0719	16.9745	17.5465	17.9589	18.8132	20.1779	20.9683	21.562	22.9768	24.0549	26.0965	27.3599	28.1885	30.3715	32.0207	33.6427	36.0112	37.943	39.1724	42.5045	44.5207	47.1301	49.3883	51.5063	53.5666	56.0583	58.8097	60.8843	63.0205	65.5068	68.4743	69.2539	69.2939	71.7827	71.8853	71.4269	70.5502	69.9478
50	5.95934	6.07605	6.40168	6.74837	6.9143	7.31331	9.3563	10.7295	12.2514	14.0173	15.326	16.4826	17.4942	17.7577	18.3113	19.149	20.0978	21.0188	21.8007	22.5186	24.5876	26.4177	27.8163	28.099	30.0394	32.3716	33.6462	36.6062	38.1853	41.0819	42.8631	45.3712	47.9282	50.0275	52.3599	54.6097	55.8794	59.6938	62.3416	62.8835	65.7211	68.3758	69.3214	71.0011	71.9388	71.6424	71.3026	70.2151	68.2426
51	5.95574	6.0756	6.26358	6.90776	7.44631	7.62985	9.01395	10.3136	12.4581	14.0606	15.7023	16.3111	17.2878	17.917	18.4933	19.2658	20.0569	21.0071	22.0108	22.8735	24.2369	26.0871	27.7285	28.9253	29.9461	31.9755	34.1486	35.6511	38.0931	40.2412	42.3158	45.7931	48.7692	50.4144	52.1144	55.1409	57.1351	59.5948	62.8058	64.942	67.1142	69.2836	70.7992	70.9679	72.4933	71.0401	70.2716	68.3627	66.856
52	6.22671	6.35984	6.42638	6.77051	7.12865	8.18707	9.08409	10.2173	12.752	14.7429	15.7012	16.108	17.1731	17.9541	18.4842	18.7923	20.3794	21.9852	23.2247	24.323	25.7156	26.8349	28.2247	30.3894	31.0856	33.0643	34.5387	36.3609	38.6123	40.4663	42.2024	45.4289	48.593	51.2328	52.7368	55.243	57.7601	60.5912	63.1591	65.6042	67.3273	68.7293	69.9417	71.0622	71.9663	70.8858	69.5287	67.5934	66.1212
53	5.83879	6.24777	6.39869	6.63852	6.72483	7.66772	9.16353	11.3173	12.3403	14.9087	16.094	16.8198	17.4793	17.9025	18.2663	19.2604	20.184	21.4504	22.7947	23.7102	24.5382	26.247	27.0851	28.7914	31.4606	33.0601	34.8519	37.0547	38.5952	41.5382	43.867	45.9523	48.7728	51.702	53.6767	55.9601	57.7154	60.5588	63.6108	65.434	67.8408	69.0418	69.7956	71.4601	71.6968	70.908	69.3311	66.832	64.3079
54	5.80299	6.02267	6.27659	6.56792	7.09487	8.602	9.82454	12.4551	13.7104	15.423	16.0644	16.8694	17.4269	18.1739	18.6153	18.9243	19.4506	21.2717	22.7664	24.1416	24.8528	26.8508	26.9598	28.6245	31.342	33.558	34.6737	36.2563	38.2736	40.3013	43.1393	45.8212	48.3322	51.2499	54.2238	57.1894	59.143	62.1621	64.7546	67.9909	68.4998	68.6595	69.9094	71.2721	70.6965	69.4216	69.0095	66.5693	62.1382
55	5.72431	5.89834	5.95711	6.30781	6.78236	7.68088	8.96063	10.8506	12.5737	13.1993	16.0298	16.5509	17.4192	18.0227	18.4654	19.2027	19.719	20.7821	21.9556	24.1037	25.7051	26.3084	27.9206	28.5637	30.9961	32.7521	33.9843	35.9098	38.2616	40.7826	42.9685	45.4884	48.1519	50.65	53.7566	58.0253	60.5744	62.597	65.014	67.8749	67.8931	68.5599	69.892	70.5746	69.7938	69.4891	67.0292	64.6976	62.0791
56	5.62823	5.94114	5.91432	6.24075	6.76374	7.81977	9.55909	10.039	11.9251	13.1066	15.1897	15.2506	16.5466	17.654	18.4915	19.3855	19.9924	20.8141	22.1756	24.1492	25.2115	26.4783	27.5604	29.2245	30.6645	32.7032	33.768	35.0962	37.3043	40.0967	42.3753	44.9621	48.0742	50.5813	53.8246	56.9155	60.8331	63.3766	66.2747	67.1149	68.1095	68.5208	69.3995	69.2755	68.2598	67.8255	65.2484	63.3477	60.422
57	5.76621	5.86171	6.30193	6.55957	7.46999	7.96332	9.25601	11.0042	12.6123	15.0209	15.8606	16.8328	16.8531	18.097	18.9347	19.2035	19.5736	20.8226	22.7146	24.6652	24.9436	26.4764	27.0022	27.848	30.1401	31.8093	33.2112	34.3075	36.5322	38.9093	43.4797	46.4384	49.9163	52.5059	55.3802	57.3636	60.4282	63.5907	66.3328	68.588	68.7215	69.56	69.908	70.6396	68.4974	66.828	65.5884	62.3219	58.0162
58	5.64444	5.86457	6.26109	6.5511	7.78153	8.31232	9.30916	9.31649	10.6075	13.1039	16.257	16.5061	17.0768	17.4454	18.6891	19.206	19.7879	21.1059	22.2864	24.0469	24.5495	26.0534	26.7877	27.8955	29.5773	31.4399	32.6744	34.6799	36.2455	39.7729	44.1408	47.4471	49.3688	53.0197	55.6565	58.2772	60.6073	62.7385	64.8241	67.9409	68.491	70.4052	70.6147	71.0493	68.7732	66.9961	64.2379	61.3548	57.37
59	5.71223	6.1114	6.21477	7.65987	8.26212	8.50107	8.80285	10.5598	11.7136	13.3818	15.7609	16.1161	16.8695	17.2811	17.9376	18.9297	19.6445	20.665	22.5895	23.4588	25.3086	25.7234	26.6372	28.8064	30.0778	31.476	33.052	34.3454	37.4974	40.7068	43.4797	45.9454	49.388	52.3336	54.6829	57.3732	60.817	62.522	64.4958	66.328	67.835	69.3933	70.1486	69.4426	67.8696	65.9065	63.3177	60.2843	56.0373
60	5.78469	5.99946	6.17837	6.44978	8.21213	8.93091	9.92345	9.75988	12.4917	12.7422	14.4272	16.4505	16.7888	17.0451	17.6138	18.6592	18.9391	19.79	21.5021	23.2101	24.1834	25.2015	26.652	28.5535	29.9362	31.0801	32.6598	34.3768	36.7698	40.0401	43.4115	45.9861	49.552	51.9543	54.2437	57.2909	60.3992	62.6678	64.4553	66.4228	68.1048	68.9593	68.7435	69.004	68.5601	66.8548	63.2982	59.5606	56.0298
61	5.8729	6.1687	6.45791	6.38524	7.0357	7.92112	8.34972	9.42287	10.1152	12.1458	13.4237	15.4458	16.5225	16.8791	17.5538	18.3871	18.6364	19.7289	21.1041	23.499	23.6765	25.3089	26.0692	27.9264	30.1275	32.1513	33.4632	34.3881	37.1052	39.5393	43.4401	46.6057	49.484	51.5488	53.6712	56.4685	58.4728	61.5906	64.0237	66.2263	68.2854	69.9732	69.4124	69.0383	69.1355	66.2049	62.4984	59.6024	54.7445
62	5.86497	5.96326	6.04949	6.50005	6.63467	7.46654	8.89898	9.87494	10.806	12.3102	13.1947	14.9979	15.8143	16.4492	17.0969	17.9407	18.7349	19.6756	20.8522	22.1702	23.8157	24.6052	25.6385	27.2999	29.7506	31.8693	33.2402	34.9404	36.9257	39.8084	42.703	46.105	49.5542	51.1007	52.9724	57.1732	59.4127	62.8371	64.1906	67.0417	67.8391	68.8122	69.1184	69.0719	68.0445	65.6402	63.1745	59.5652	53.7656
63	5.77762	6.10497	6.10497	6.47486	7.05946	9.14756	9.37086	8.84459	9.60076	10.1082	11.701	13.3493	15.0343	16.8009	17.2059	17.698	19.1694	20.0385	21.3506	22.5655	24.5824	25.119	25.6765	26.391	28.2959	29.8172	32.4358	34.3669	37.2568	39.5571	42.7012	45.2705	48.2943	50.777	52.8367	56.6399	58.7433	60.7093	63.3827	66.6912	67.5402	69.0982	68.9982	68.4401	66.8052	64.6087	63.3729	59.2356	55.7077
64	5.75103	5.99927	6.2493	6.46722	6.81439	7.67321	9.16118	9.62288	9.64972	9.48059	10.5262	11.2418	13.9747	14.9188	16.8204	18.261	19.4161	20.2246	20.8852	22.2857	23.9455	23.891	24.4052	26.055	27.3045	29.8695	32.0554	34.0288	35.7367	38.4627	40.7804	44.2691	46.4554	49.3895	52.2062	54.7357	58.1663	60.2654	63.2955	65.385	66.6285	68.3832	67.5343	68.191	65.8152	64.9307	62.6376	60.2554	56.7463
65	5.42237	5.65575	6.06167	6.29757	6.69762	7.35262	8.24557	10.1093	8.56796	9.5168	8.89954	9.7972	11.5222	13.558	16.9262	17.6782	19.364	20.2861	20.4404	21.0589	22.1886	23.5594	24.5898	26.2742	27.2318	29.0257	31.3747	33.1759	35.4364	37.8407	40.1068	43.5855	46.0259	49.0871	52.0531	54.7433	56.7553	58.4319	61.4146	63.617	66.1151	66.9737	67.528	67.3972	65.7996	65.1	63.1576	61.0403	57.872
66	5.36337	5.56816	5.65575	5.87562	6.00441	6.18113	6.59034	7.64798	8.79701	8.87981	9.1485	10.3715	12.71	13.6624	16.222	18.4048	19.4998	19.9006	20.3568	20.9566	22.2828	23.3959	25.0012	26.3338	27.8214	29.75	30.8527	32.6436	34.8897	36.9609	40.7169	43.2021	45.3632	48.8211	52.1903	53.9894	56.4538	58.1419	60.3421	62.7971	64.1264	65.3714	67.8987	67.4527	66.8466	66.2236	63.6651	61.3172	57.999
67	5.24809	5.21726	5.49727	5.7583	5.91153	6.27051	6.504	7.36062	8.37625	8.94657	10.0165	12.386	13.432	14.7011	15.8184	18.0751	18.7724	19.559	20.0179	20.7079	22.3609	22.5715	24.3291	26.2128	27.4407	29.5613	30.7868	32.6248	34.9184	37.1646	39.6106	42.2992	45.6384	48.4324	50.8105	52.2849	54.5425	57.9209	60.2829	61.5209	63.4562	65.059	66.7212	67.5846	66.3211	66.003	63.6581	61.3027	59.2796
68	5.38228	5.51443	5.60296	5.78002	6.17453	6.31285	6.69026	7.03041	8.04399	8.50029	10.2242	11.0431	12.3645	14.3992	15.235	15.7436	17.3053	18.2194	19.303	20.8667	22.2276	23.2371	24.6079	25.6533	27.2072	28.8667	31.5265	33.1638	34.1998	36.3817	38.2588	40.8158	44.2814	47.1884	49.7766	51.3614	54.504	57.0356	59.0671	61.4899	62.8142	63.3021	66.0277	66.1352	65.6656	66.1085	63.5322	61.9399	59.2102
69	5.04522	5.17821	5.34585	5.64091	5.82684	6.31889	6.39134	6.59341	6.87433	7.59856	8.54264	10.009	11.3099	13.0306	14.6462	15.7093	17.149	18.6805	19.2722	20.8448	22.4552	23.9441	24.9631	26.5949	27.7712	29.3792	30.5671	32.5417	34.4081	35.565	37.8046	39.6454	42.9805	45.9935	49.2755	51.2955	53.196	55.6686	57.6746	59.6247	60.7956	62.0096	65.1291	64.7763	64.234	65.2715	63.1179	61.4816	59.4787
70	4.82416	4.82428	5.13437	5.33564	5.64715	6.04042	6.12944	6.55034	7.05851	7.47935	9.18393	10.6685	12.0646	14.0041	15.3969	16.9489	17.6324	17.5878	18.8901	20.4499	21.9459	23.6144	24.4954	26.0428	26.4936	28.5181	29.1697	30.9449	32.4671	35.4686	37.8404	39.7203	41.4317	44.4248	47.7665	49.9014	52.0949	54.1759	56.5207	58.9199	61.8074	63.078	63.9805	64.1546	64.3054	65.096	63.721	62.3505	60.2098
71	4.65099	4.75848	5.20125	5.2452	5.44962	5.62609	5.98874	6.48189	6.9641	7.49466	8.59408	9.87859	12.3449	13.4595	14.6562	15.222	16.3795	17.4764	18.564	19.8438	20.6579	22.8112	24.06	26.0011	26.7281	27.3221	28.6444	30.4198	31.9511	34.1136	36.5252	39.7703	41.6143	44.0597	45.9153	48.7765	50.1362	51.7511	55.4092	58.1006	60.0151	62.1033	61.9935	63.2854	64.6266	64.4265	64.3198	64.0088	61.6942
72	4.6363	4.64672	4.82501	5.18867	5.46012	5.64393	5.88972	6.35875	6.82851	7.31426	8.22647	9.48758	10.5419	12.4558	13.9383	15.8449	15.0717	16.1767	17.6078	18.8449	20.2341	21.4857	23.4976	24.9599	25.8978	26.2327	28.6274	30.3164	32.1393	33.9096	34.8738	37.927	40.1211	42.5577	44.676	46.7939	48.6501	51.3199	54.5468	56.4168	59.002	60.9868	60.7724	62.1796	63.2029	63.9167	64.7012	63.4753	61.2305
73	4.75878	4.8444	5.10003	5.1772	5.53261	5.78901	6.14669	6.75215	7.10956	7.23967	8.32213	9.04233	10.393	11.1084	11.7464	13.3622	13.8327	15.9478	17.7076	18.2167	19.3592	20.6406	22.2926	23.2711	24.155	25.5293	26.8138	30.1473	31.4452	32.8683	34.9125	37.1434	38.5695	41.752	44.4265	45.4012	46.7203	49.9325	52.5421	53.6179	56.0279	59.2344	59.6921	60.2445	61.6285	62.9633	62.5183	62.0635	62.5673
74	4.66047	4.89609	5.2843	5.32521	5.57894	6.251	6.46203	6.61254	6.80512	7.42195	7.83028	7.98192	8.35752	9.12996	10.2602	11.4696	12.8658	14.6653	16.474	17.8709	19.564	20.7532	21.8072	22.9782	24.4062	24.7821	27.3724	28.9825	30.2135	31.8834	34.393	36.6829	37.9924	39.9247	42.5435	43.5484	45.4675	48.6117	50.8803	52.3259	54.3444	57.4321	57.7971	59.0972	59.9838	61.7824	62.0886	61.1643	61.7273
75	4.54963	4.58999	5.18065	5.3386	5.60639	6.0072	6.19533	6.75329	7.15731	7.31356	7.71254	7.86487	8.64218	8.65157	9.04931	10.1134	12.0777	14.5769	16.9876	18.2728	19.1943	20.2454	21.3669	22.6262	23.3297	24.2013	25.7341	28.011	29.7713	30.8181	33.2783	33.9048	36.0505	38.0543	40.4758	41.6625	44.7347	47.1794	48.9529	51.5945	53.7272	54.7627	57.2019	57.1506	57.8971	59.207	60.6519	61.3078	61.2135
76	4.46664	4.90569	5.05749	5.31414	5.54793	5.7879	6.30959	6.67328	7.157	7.46064	7.83028	8.12537	8.19676	8.5577	8.79965	9.58168	10.5921	12.2909	16.0118	17.2342	18.4818	19.1811	19.982	21.2962	22.4706	23.8269	25.6969	26.3882	27.1142	29.7221	31.4614	33.172	34.5707	35.6377	37.0691	39.3693	43.0451	45.597	48.045	50.1089	52.0937	53.6567	55.8832	55.9824	56.227	57.0588	59.3544	60.8969	61.1553
77	4.34282	4.62588	5.03933	5.3031	5.25772	5.62289	5.8382	6.4652	6.7371	6.79393	6.88174	7.50342	7.93037	8.48573	8.72249	8.94348	9.72376	11.222	13.9634	16.7051	17.6563	18.5868	19.2559	20.1682	21.9309	22.7143	24.9221	25.5532	26.5765	28.8274	30.7627	31.8825	33.154	34.4633	36.343	38.4577	40.2636	42.5549	45.4935	47.2598	48.8171	51.9072	53.4798	56.0857	56.2228	56.3337	57.9069	59.8053	59.5208
78	4.43097	4.56787	4.9132	4.96283	5.16203	5.61763	5.89046	6.04174	6.61841	6.70018	6.88219	7.06046	7.47106	8.2176	8.56969	8.82463	9.29487	10.9061	12.4648	14.2825	16.8367	18.6467	18.7155	20.2795	20.9921	22.5297	23.6689	24.7695	26.0201	27.7771	29.5634	30.5134	32.0567	33.0707	35.5453	36.6275	38.0575	40.1202	42.1713	44.6293	47.2497	49.8343	51.002	53.0622	54.3122	55.25	56.4129	57.288	57.4371
79	4.36217	4.16866	4.39243	4.74951	5.13044	5.46231	5.76031	6.03566	6.31628	6.46162	6.83503	7.09995	7.29751	7.79449	8.19826	8.57027	9.16554	9.98926	11.1702	12.7283	15.8984	18.7217	18.9256	20.6554	21.0346	21.0985	22.2321	24.1122	25.3625	26.5874	27.8027	29.4006	31.4504	33.3557	33.6371	34.6421	36.0336	38.4055	40.6534	42.8158	45.2845	47.5547	49.057	49.6703	51.6581	52.7371	54.3674	54.1048	55.4196
80	3.85103	4.04282	4.25045	4.49836	4.91601	5.22061	5.79185	6.03296	6.21395	6.70423	6.88509	7.09088	7.18552	7.4635	7.89467	8.48541	8.8133	9.44702	10.1782	11.5899	14.6023	16.3529	18.2718	19.8018	20.3302	21.1585	21.0369	23.7182	24.549	25.5314	27.2785	28.6268	30.0614	31.8533	32.3435	33.0548	34.7218	36.199	38.6568	41.4218	43.7938	46.0684	46.7284	46.5156	48.5042	49.9721	51.4599	52.2374	52.4423
81	3.80549	4.35535	4.34407	4.58243	4.85971	5.28375	5.5246	5.78398	5.99087	6.45683	6.91111	7.12123	7.34899	7.54927	7.96994	8.20402	8.97277	9.50125	10.0184	11.6403	13.278	14.4378	17.2253	19.2423	19.4093	20.2119	20.5795	22.3579	23.6022	24.7155	25.8705	27.8607	29.1254	30.2116	31.4114	31.7589	32.5871	34.6887	36.5501	39.0272	41.2749	42.5684	42.9116	43.5925	46.4761	47.2628	48.499	49.0897	49.9689
82	3.65656	3.69219	4.1499	4.33813	4.72856	4.91767	5.42266	5.61763	5.84635	6.11511	6.51047	6.89645	6.97946	7.45441	7.94449	8.6243	8.98525	9.47156	10.0635	11.5403	13.1536	14.3354	17.2078	17.9581	18.4178	19.7686	19.729	20.8772	22.3614	23.8144	25.5935	25.9775	27.0304	28.6282	30.0295	31.0801	30.9443	33.3832	35.8902	37.1896	38.2123	40.0114	41.3016	42.6274	43.6127	45.0148	46.1509	47.2032	48.0442
83	3.47966	3.56094	3.85538	4.23254	4.64611	5.0256	5.28969	5.52486	5.77306	5.85093	6.18232	6.55973	6.9547	7.32316	7.78521	7.95956	8.66402	8.87145	9.07651	10.5859	13.1971	13.528	14.512	14.852	18.2178	18.2909	19.218	19.9093	21.185	22.8446	23.6325	24.7301	25.2617	27.3745	27.9763	29.516	31.1085	32.497	34.1201	35.1017	36.8883	38.3282	39.3247	39.8126	41.4284	42.3393	43.9533	44.9171	45.5204
84	3.43169	3.37536	3.42548	3.73945	4.24342	5.03496	5.2478	5.25983	5.32965	5.80652	5.85694	6.32274	6.81515	6.79576	6.98003	7.67961	7.79585	8.01927	8.47032	9.88515	12.8332	12.731	13.9768	13.9581	15.7322	16.7388	18.7392	19.2431	20.0944	21.3119	21.6531	23.0026	22.9975	25.6244	27.369	28.7608	30.5609	30.8668	32.0972	33.8413	34.1665	36.4398	37.0878	37.4907	39.1471	40.3773	41.8735	42.6538	43.505
85	3.17859	3.35783	3.62327	4.1998	4.55998	4.77343	5.08834	5.03844	5.12162	5.53206	5.84591	5.97567	6.26463	6.6147	6.81331	6.79165	7.60271	7.67879	7.8614	8.55095	10.4418	11.7076	11.836	14.0163	15.5722	17.0445	17.1744	19.3994	19.9519	20.5027	20.2778	21.5418	22.2098	23.5274	25.8062	27.1712	29.3008	30.3063	31.2305	32.0736	33.0061	34.6208	34.7472	35.8377	37.4601	38.0564	39.7205	40.3641	41.0035
86	3.26507	3.45437	3.89763	4.17616	4.27541	4.55744	4.55744	4.32968	4.76813	5.24127	5.75295	5.96695	5.909	6.275	6.61506	7.1258	7.39039	7.71897	8.21755	8.34666	8.84142	9.77856	11.4217	11.9643	13.9878	16.6067	16.2803	18.7059	19.2711	19.887	19.9908	20.9608	21.8777	22.9759	25.2113	26.7362	27.5732	28.7761	28.6285	30.1414	31.2948	31.9065	32.6659	34.6175	35.2359	36.4557	36.9275	38.2013	38.382
87	3.34389	3.32369	3.57248	3.71506	3.93241	4.1327	4.16285	4.36685	4.44786	5.10763	5.42723	5.81709	5.84194	6.13262	6.43214	7.05872	7.37447	7.46254	7.71476	8.22931	8.69249	9.41327	9.77856	10.887	13.1411	14.5327	15.6324	16.4519	18.4043	18.4625	18.9683	20.0794	21.6601	22.0428	23.9238	24.511	25.6807	27.2164	28.2408	28.6517	29.4521	30.0066	31.2291	32.3514	32.8454	33.313	34.0351	35.2104	35.7646
88	3.43502	3.29013	3.37239	3.70421	3.77664	3.70992	4.13308	4.17611	4.54427	4.82269	5.03846	5.34195	5.91348	6.18794	6.40957	6.94478	7.00649	7.28462	7.51008	7.58509	7.9968	8.81715	8.93721	9.51874	10.2453	13.686	13.7946	13.7934	14.1442	16.0041	18.5113	19.47	19.7785	21.334	21.7837	22.8918	23.5781	25.3088	25.9351	26.4347	27.319	28.3089	29.2625	28.5013	29.2004	30.0395	32.6942	33.5565	33.9766
89	3.30557	3.39482	3.39999	3.41076	3.58181	4.07352	4.17517	4.25213	4.50284	4.54206	4.53527	4.98706	5.41745	6.00148	5.89191	6.46198	6.61536	6.66742	7.4111	7.31609	7.45839	8.05606	8.3363	8.75453	9.50954	10.6569	11.6942	11.8461	12.6137	14.4183	15.3249	17.0017	17.2193	18.9162	20.6229	21.9982	22.4712	23.6338	24.0835	25.6453	25.2761	25.8167	26.4172	26.1484	27.155	27.8422	30.2207	32.0274	32.2022
90	3.37255	3.38344	3.40013	3.57785	3.60022	3.79842	4.04579	4.14324	4.19941	4.48355	4.58976	5.01289	5.27126	5.61763	6.09534	6.75849	7.03944	7.09521	7.29709	7.3449	7.32236	7.85521	7.98578	8.4058	8.91716	8.86658	10.1564	10.7712	11.9761	12.2317	13.3213	14.1817	15.5064	16.0706	17.3612	20.0369	20.9036	21.9796	22.2564	22.9831	23.1064	23.0698	24.7186	24.3531	24.958	26.0827	27.6559	29.4016	29.0499
91	3.26629	3.18369	3.40495	3.5964	3.93811	3.93486	4.08535	4.01295	4.17528	4.31939	4.57842	4.66314	5.37089	5.59776	6.26239	6.61536	6.83115	6.85369	6.78536	7.0559	7.38636	7.68038	7.70086	8.17955	8.59398	8.93002	8.94622	9.61121	11.0034	10.7166	10.9685	11.6985	14.9715	16.2436	16.991	16.8889	18.7559	19.3182	19.4906	20.7756	21.2431	21.5528	23.1217	23.6278	23.7593	24.2834	26.2691	27.4582	27.8767
92	3.63934	3.75539	3.82814	3.94131	3.81292	3.87929	3.89737	4.03301	4.14455	4.39682	4.74533	4.85986	5.29686	5.61763	5.58714	5.78905	6.22836	6.8723	6.64795	6.78221	7.15487	7.49731	7.53742	8.06909	8.10268	8.54321	8.60516	9.01945	9.32121	9.94408	10.2436	11.22	14.3462	16.5788	16.8971	17.4548	16.6042	15.9254	17.7931	19.4773	18.8594	20.2225	21.7036	21.1567	22.8155	23.2599	24.5882	25.2747	25.6465
93	3.70209	3.64281	3.53637	3.47659	3.60079	3.70224	4.09301	4.11425	4.00307	4.29121	4.84006	4.86619	5.24445	5.36939	5.21474	5.40557	6.09312	6.26706	6.30216	6.22194	6.79751	7.3472	7.80841	7.79268	7.8538	8.26939	8.47531	8.94069	9.15245	9.85705	9.83687	10.7159	13.7938	15.3246	15.534	14.7686	14.4169	13.3232	15.6876	16.7142	17.0334	17.5304	19.9251	20.52	22.072	22.7199	23.5556	24.4929	23.659
94	3.32041	3.2627	3.28328	3.20463	3.5429	3.55137	3.90413	3.95977	4.08618	4.12858	4.34669	4.81805	4.5524	4.44294	4.70659	4.94221	5.25686	5.70653	6.07321	6.23055	7.06862	7.03149	7.62887	7.64529	7.61763	7.6982	8.66566	8.64447	8.95787	9.38491	9.58474	10.8172	12.0742	11.8164	11.9164	12.5344	11.9523	12.2783	14.5295	14.6771	14.7761	14.9069	16.1804	19.1576	18.7025	20.4006	21.2315	22.7154	22.6542
95	2.97896	3.28519	3.02541	3.04346	3.29557	3.48897	3.69816	3.85738	3.94455	3.97584	4.06541	4.27025	4.425	4.42313	4.54632	4.78408	5.0585	5.73782	6.08746	6.27654	6.45809	6.86475	6.95122	7.26924	7.63851	7.82524	8.09354	8.30045	8.76803	9.0032	9.53546	9.67306	10.3694	10.8661	11.0047	10.9035	10.9689	10.9749	13.1064	13.0686	13.995	14.0698	14.4778	17.0833	15.8722	15.9641	18.2889	20.8529	20.6901
96	2.70823	2.64336	2.61486	2.74242	3.1185	3.28175	3.51296	3.53848	3.72893	4.09474	4.21025	4.37707	4.47769	4.42366	4.42607	4.60125	4.98586	5.56481	5.82041	5.90056	5.88987	6.33984	6.59189	7.24928	7.36444	7.71476	7.77663	7.90493	8.50267	9.01323	9.74623	9.41107	9.73727	10.2441	10.7973	10.6318	10.5869	11.1645	11.6348	11.1283	11.9695	13.2057	14.0424	14.693	13.6113	13.5768	16.1629	18.2275	18.5623
97	2.77125	2.4356	2.60891	2.71692	2.8688	3.12212	3.13719	3.32278	3.81779	3.99373	4.21662	4.17115	4.38292	4.42197	4.57984	4.67163	4.88872	4.97594	4.91818	5.29324	5.94805	5.88987	6.53057	6.62086	7.03365	7.27578	7.21823	7.44929	7.94188	8.96788	9.45962	8.97437	9.29357	9.6709	10.2035	10.1479	10.5447	10.1586	10.2574	10.2938	10.539	11.7385	11.4837	12.2241	12.6636	12.7405	15.5385	16.9344	15.4871
98	2.18281	2.6844	2.6826	2.78182	2.90598	2.91977	3.17646	3.57657	4.07771	4.42504	4.674	4.35788	4.42513	4.57591	4.32596	4.55945	4.79334	4.75516	4.70119	5.23334	5.27693	5.7476	5.88999	6.35646	7.03308	7.20389	7.04849	7.45561	7.67631	8.63986	9.16571	8.9831	8.94408	9.15649	9.58318	9.68234	9.91365	10.1396	10.1731	9.98796	10.4851	10.7062	11.0122	11.0567	11.6282	11.911	12.7	13.7775	13.6121
99	2.7882	2.62693	2.77983	2.72812	3.02392	3.05564	3.6087	3.78267	4.09055	4.09055	4.42348	4.46583	4.43149	4.37467	4.36602	4.41547	4.75072	4.34411	4.4297	4.7397	5.10056	5.35682	5.82844	5.80708	6.87318	6.91022	7.12608	7.26348	7.88108	8.49954	8.64481	8.47285	8.77027	8.75968	9.05045	8.97469	9.58721	9.68584	9.8792	9.70025	9.90885	10.0318	10.4232	10.8572	11.1634	11.1679	11.5121	11.5983	12.0301
100	2.70414	2.58724	2.70159	2.8701	3.12334	3.57657	3.89936	3.70682	4.00069	4.15229	4.30738	4.42178	4.38474	4.48292	4.35356	4.23101	4.34454	4.40751	4.674	4.97232	5.33331	5.3335	5.45903	5.78251	6.03742	6.97704	6.88897	7.27185	7.77505	7.99691	7.92288	8.12393	8.23685	8.46381	8.42472	8.46598	8.97907	9.24143	9.12157	9.24642	9.13193	9.37576	9.74128	10.3571	10.0851	10.44	10.938	11.1624	10.9877
101	2.7174	2.78191	3.13165	3.07508	3.21589	3.28999	3.58681	3.71204	4.06289	4.04676	3.76244	4.20764	4.3888	4.47376	4.35728	4.30989	4.61573	4.79296	4.68905	4.94263	4.8428	4.89262	5.45639	5.54637	5.9174	6.7676	6.45772	6.58484	7.35112	7.77281	7.63904	7.62637	7.48722	7.85783	7.92508	8.42617	8.28233	8.66044	8.75266	8.68787	8.76605	8.72553	9.23501	9.70905	9.82514	10.0684	10.8639	10.4306	10.2199
102	2.78191	2.98761	2.86116	3.15334	3.25611	3.25693	3.16411	3.47074	3.59816	3.98748	4.12827	4.3778	4.39165	4.15917	4.50583	4.52742	4.3796	4.44522	4.29394	4.57117	4.42871	4.73643	5.41396	5.78714	5.77258	6.26288	6.06611	6.25695	6.75799	6.8712	6.99158	6.81636	6.57994	7.31129	7.39109	8.12677	8.15791	8.24939	8.27334	8.4732	7.95948	8.14213	8.93275	8.99806	9.4987	9.62841	9.97376	9.99399	9.76795
103	2.65118	2.7602	3.14894	2.95199	3.21589	3.24138	3.26385	3.54164	3.77945	3.57016	4.05157	4.16415	4.38442	4.39665	4.38429	4.67201	4.37054	3.9938	4.29211	4.3002	4.51111	5.00484	5.31533	5.30903	5.48333	5.74215	5.63549	5.76548	6.06666	6.42331	6.37421	6.3156	6.30579	6.84974	7.07526	6.93045	7.39168	7.8267	7.86943	7.98447	7.85019	7.98191	8.63396	8.82391	9.08265	9.03875	9.54212	9.75509	9.68438
104	2.65831	2.78048	2.86219	2.90208	2.96562	2.92356	3.459	3.57657	3.39301	3.69057	4.12268	4.02273	4.05172	4.56789	4.86017	4.80202	4.67133	4.26587	4.44604	4.4287	4.45075	4.81052	5.32997	4.95342	5.48382	5.48999	5.25664	5.55368	5.76148	5.85521	5.90087	6.13627	5.95427	6.30729	6.27862	5.99043	6.38689	7.09246	7.67682	7.67016	7.56022	7.91485	8.05339	8.52558	8.48666	8.85208	9.16542	9.40212	9.36461
105	2.45422	2.41917	2.65897	2.87551	2.87942	3.20733	3.21717	3.39592	3.32633	3.73668	4.04505	3.89317	4.43446	4.45228	4.93346	5.01253	4.76739	4.86444	4.58917	4.4287	4.46414	4.52189	5.15189	5.40915	5.11405	5.1478	5.14036	5.13313	5.51162	5.41751	5.52874	5.73525	6.24037	5.77277	5.98269	6.12914	6.36134	6.39075	6.85963	7.15487	7.50738	7.29814	7.93849	8.4976	8.09778	8.41885	8.45696	8.88571	8.95595
106	2.33935	2.3948	2.8097	2.86018	2.86364	2.94103	2.97148	3.21693	3.38186	3.86484	3.93501	4.05105	4.29979	4.48514	4.79258	4.74245	4.49402	4.65523	4.86867	4.72736	4.65019	5.04093	4.97646	5.12598	5.15793	5.16767	4.94204	5.15464	5.54844	5.1849	5.3241	5.34718	5.76538	5.60846	5.62705	5.88698	6.39665	6.654	6.47063	7.09798	7.41985	7.36624	7.78787	8.22484	8.12768	7.85026	7.83304	8.62854	8.63666
107	2.23654	2.64218	2.33709	2.33721	2.88197	3.0735	3.26384	3.20711	3.4462	3.64415	3.8197	4.04411	4.11323	4.29546	4.5426	4.32523	4.28248	4.49871	4.87473	4.58882	5.01683	5.01683	4.93993	4.94204	4.90794	4.91649	4.46723	4.85448	5.37602	4.98237	5.04476	5.15435	5.55066	5.55066	5.31337	5.7992	6.19461	6.27907	6.43589	6.74849	6.91105	7.38696	7.62744	8.16808	7.8736	7.6407	7.71223	8.15633	8.33456
108	2.3948	2.72466	2.70294	2.8262	3.04278	3.29112	3.29768	3.21539	3.21539	3.51077	3.85047	3.8263	4.09575	4.32523	4.03119	4.04552	4.25924	4.4653	4.56522	4.77231	5.01683	4.84973	4.93993	4.92744	4.62467	4.21816	4.41602	4.46713	4.8079	4.69966	4.83252	5.12053	5.14036	5.30564	5.23041	5.74705	6.18506	5.9905	5.98427	6.28641	6.35618	7.0903	7.32948	7.65558	7.60078	7.24622	7.54244	7.61566	7.91151
109	2.94119	2.98285	2.84214	2.87416	3.266	3.28557	3.18289	3.15638	3.24207	3.55087	3.75521	4.00072	4.21839	3.81506	3.95402	3.58821	4.09688	4.14116	4.46533	4.84982	5.06859	4.93862	4.93993	4.53394	4.56301	4.41119	4.25509	4.42197	4.57825	4.47853	4.85375	4.89864	4.76479	5.02278	5.01385	5.59628	6.20652	5.79128	5.86073	5.81494	6.4223	6.52173	6.46716	6.87642	6.80631	6.93652	7.09295	7.03862	7.47291
110	3.25081	2.92748	3.28435	3.34284	3.57063	3.61378	3.222	3.22324	3.26214	3.49586	3.67798	3.8547	4.11354	3.63491	3.34884	3.26104	3.9663	3.85314	4.25687	4.97858	4.56582	4.6416	4.544	4.47228	4.79995	4.49412	4.19632	4.36979	4.16754	4.44484	4.58121	4.52773	4.86266	5.31782	5.12632	5.41373	5.23041	5.28596	5.54344	6.02608	5.36981	5.83438	5.96104	6.08587	6.15338	7.16505	6.84171	7.05886	6.97639
111	3.45322	3.50237	3.61403	3.66174	3.26365	3.26734	3.14571	3.09369	3.69077	3.42225	3.6184	3.70993	3.47582	3.09742	2.79671	3.24896	3.48429	3.81868	3.84002	4.50484	4.20318	4.52979	4.35416	4.63924	4.55236	4.46611	4.37043	4.31312	4.46538	4.79608	4.71749	5.00608	4.61132	4.91405	5.32157	5.21738	4.81784	5.27282	5.31761	5.46473	5.32154	5.27035	4.81488	5.50319	6.07759	6.19958	6.60939	6.11728	5.91914
112	3.49085	3.56268	3.34138	3.29894	3.27805	3.29329	3.18289	3.0152	3.02334	3.15536	3.40918	3.15536	2.74232	2.80126	2.78439	3.07937	3.79539	3.81868	4.14116	4.00283	3.93216	4.30141	4.61228	4.85028	4.8536	4.83805	4.42753	4.77861	4.85423	5.10913	5.02278	4.88074	4.43586	5.01764	5.16819	4.50358	4.24151	4.84219	4.92581	5.02611	4.99367	4.54694	3.85136	4.98295	5.37174	5.61763	6.23961	5.85823	5.82828
113	3.73868	3.99248	3.65671	3.6087	3.27656	3.33214	3.26474	3.14842	3.25277	3.03941	2.83245	2.74407	2.59265	2.68404	2.83406	3.50329	3.79123	3.81319	4.08281	3.35999	3.73013	4.48393	4.45996	4.85487	4.86347	4.85636	4.85423	4.88321	4.91847	5.11704	4.6918	4.54439	4.40565	4.90391	4.6563	4.40227	4.24111	4.24071	4.84219	4.95297	4.8367	3.65594	3.59759	4.56932	4.68481	5.01368	6.12196	5.73305	5.2028
114	3.65671	3.79619	3.87394	3.56777	3.34576	3.54655	3.60321	3.31991	2.93157	2.79652	2.74507	2.69111	2.44719	2.58276	3.19152	4.20318	3.84081	3.8715	3.47432	3.97787	4.09407	4.31819	4.41665	4.8371	5.12532	5.37133	4.99119	4.82447	4.84991	4.42197	4.25924	4.46324	4.28489	4.17307	4.25924	3.79139	3.81085	4.48473	4.66966	4.80875	4.2341	3.92031	3.95322	4.53402	4.82573	5.10882	5.70704	5.57939	4.80977
115	3.61378	3.81026	3.62118	3.54879	3.62513	3.65042	3.34407	3.08479	3.07814	2.55847	2.74507	2.8045	2.84697	3.34563	3.54539	4.20318	3.4097	3.35693	3.90789	3.62808	3.69813	3.80638	4.15134	4.61729	4.97486	5.00399	4.7025	4.64702	4.33118	4.17653	4.1892	4.17017	3.87117	3.60159	3.76849	3.53792	3.5625	4.24111	4.64482	4.50505	4.01982	3.40895	3.67345	4.26734	4.71943	4.7594	5.15858	5.31291	5.25432
116	3.82433	3.63815	3.52338	3.63288	3.81895	3.27463	3.08479	2.74853	2.72671	2.82871	2.94108	2.92818	3.36394	3.43163	3.42511	3.43815	3.49402	3.63327	3.62932	3.42521	2.90971	3.29945	4.31834	4.35811	4.76892	4.85196	4.36474	4.11796	4.16376	3.87953	4.22797	3.5676	3.4351	3.62443	3.57657	3.16231	3.42327	3.67877	3.82171	3.78201	3.68849	3.27187	3.20973	4.08033	4.45388	4.94861	5.37915	5.39507	5.04256
117	3.94361	3.6087	3.81917	3.81868	3.5908	3.21389	2.91076	3.03083	2.78411	3.05801	3.01347	3.49102	3.47598	3.21841	3.35693	3.88263	3.85292	3.87491	3.35612	2.6205	3.27084	3.25254	4.21363	4.21761	4.00195	4.45743	3.97439	4.33118	4.0195	3.85947	3.46531	3.19284	3.4612	3.03354	3.39896	3.12212	3.12212	2.74585	3.09073	3.64918	3.25985	2.68793	2.82705	3.67689	4.30715	4.78592	5.64644	5.53375	5.14554
118	3.41864	3.63347	3.51947	3.74218	3.39442	3.31004	2.95845	2.89862	2.86757	2.97125	3.43227	3.45785	3.42788	3.48277	3.69239	3.97988	4.14872	3.64311	3.03334	2.91123	3.46172	3.47517	3.45363	3.6194	3.74158	3.84638	3.80428	3.92106	3.76143	3.40067	2.90806	3.04925	3.07129	2.48789	3.0509	2.52004	2.67235	2.68366	2.73436	3.63294	3.34988	2.41583	2.85521	3.34445	4.45401	4.95729	5.79982	5.79086	4.94584
119	3.63716	3.729	3.68523	3.61112	3.35843	3.41111	3.41159	2.88812	2.88228	3.13344	3.21682	2.95696	3.53719	3.66387	3.97645	4.04313	3.83523	3.38953	2.81574	3.19243	3.12923	3.35431	3.33503	2.98715	3.67849	3.7037	3.754	3.4188	3.28148	3.6579	2.85769	2.84086	3.02835	2.2444	2.14862	2.03438	2.51437	2.87186	2.63076	3.46375	3.09878	2.42251	2.59623	3.57748	4.11956	5.08628	5.44105	5.65732	4.55146
[truncated: 71 more columns]
