# Supplementary material for: Unexpected long-term variations of Saturn’s ring current revealed by energetic neutral atom imaging
Source: Research Square preprint supplement (doi:10.21203/rs.3.rs-3271171/v1), 2023-09-18
Supplement: Supplementary file 18 [file bbe13c0b145d51b821cfe7e6.xlsx]

## Sheet: ff1
	0	1	2	3	4	5	6	7	8	9	10	11	12	13	14	15	16	17	18	19	20	21	22	23	24	25	26	27	28	29
0	0.470257	0.493302	0.517176	0.53554	0.57676	0.584775	0.617651	0.626396	0.641824	0.662549	0.684119	0.682244	0.697065	0.700661	0.710043	0.702188	0.708091	0.699916	0.705955	0.689586	0.665431	0.664592	0.650837	0.62703	0.600964	0.587034	0.57483	0.563784	0.52397	0.526295
1	0.457471	0.469794	0.473332	0.513679	0.529013	0.560795	0.577607	0.609613	0.630527	0.656505	0.675542	0.684078	0.678203	0.694074	0.693763	0.70038	0.705553	0.691539	0.692281	0.703468	0.668125	0.63806	0.617536	0.616902	0.609166	0.596678	0.562624	0.556507	0.533663	0.547497
2	0.445495	0.47429	0.48893	0.513074	0.542682	0.577947	0.570993	0.617255	0.638246	0.656029	0.650739	0.676147	0.676927	0.688551	0.680632	0.662832	0.680333	0.687504	0.676978	0.644457	0.642517	0.633881	0.60457	0.597099	0.582226	0.562472	0.557952	0.529559	0.48164	0.504399
3	0.467414	0.472416	0.495375	0.549751	0.568699	0.58565	0.584331	0.625546	0.649473	0.661186	0.674676	0.674676	0.676193	0.676342	0.664954	0.674197	0.67996	0.664737	0.657752	0.635903	0.637448	0.614962	0.597858	0.551315	0.550721	0.532322	0.521862	0.510142	0.497039	0.446648
4	0.472318	0.496679	0.496679	0.530183	0.560402	0.589868	0.616825	0.618026	0.639192	0.647642	0.654464	0.681912	0.682333	0.670078	0.670078	0.674073	0.680748	0.676679	0.668977	0.651521	0.623586	0.599287	0.571219	0.553418	0.546469	0.524232	0.519213	0.499634	0.467684	0.439932
5	0.466504	0.481025	0.510572	0.532493	0.592913	0.592913	0.611867	0.622874	0.646698	0.664911	0.682703	0.674074	0.7054	0.7054	0.700943	0.676779	0.65671	0.66093	0.661761	0.648703	0.623606	0.622926	0.587645	0.561294	0.534047	0.511015	0.485885	0.467818	0.428058	0.41294
6	0.466504	0.472091	0.502822	0.542745	0.572604	0.605128	0.627899	0.632595	0.655786	0.657033	0.675542	0.674405	0.708567	0.716065	0.711308	0.698729	0.691259	0.691259	0.655759	0.628172	0.598716	0.586741	0.586741	0.573051	0.548739	0.515356	0.457986	0.457986	0.438537	0.401655
7	0.480844	0.493229	0.524342	0.538494	0.56991	0.635167	0.635167	0.654817	0.669418	0.666851	0.670802	0.688393	0.689936	0.680375	0.657782	0.680122	0.68554	0.657483	0.657483	0.628463	0.571282	0.546122	0.537457	0.514633	0.518195	0.49113	0.459753	0.464155	0.398199	0.376642
8	0.501774	0.514989	0.524342	0.538901	0.577507	0.622359	0.622359	0.651141	0.684446	0.701054	0.688685	0.69838	0.717478	0.702578	0.678816	0.682267	0.660863	0.645717	0.645717	0.606272	0.574234	0.542573	0.524517	0.493228	0.461384	0.442529	0.423554	0.414891	0.384002	0.377715
9	0.511447	0.522531	0.529081	0.55565	0.604116	0.61991	0.634874	0.666004	0.717238	0.72919	0.71767	0.733259	0.733677	0.705939	0.702581	0.675297	0.663835	0.663835	0.645678	0.581165	0.565475	0.563037	0.563037	0.51506	0.48912	0.466781	0.437323	0.437323	0.390933	0.351591
10	0.511447	0.53554	0.563317	0.594742	0.610551	0.610551	0.654265	0.663652	0.704927	0.703536	0.705529	0.700055	0.710536	0.710536	0.718814	0.678654	0.670948	0.655957	0.621776	0.595122	0.571252	0.555183	0.506505	0.489325	0.454157	0.430312	0.404817	0.397034	0.370129	0.376777
11	0.546781	0.569619	0.569619	0.583968	0.615916	0.634585	0.651281	0.688879	0.720028	0.739053	0.699503	0.718791	0.726649	0.725468	0.725468	0.699136	0.693611	0.665823	0.629349	0.603045	0.582191	0.543983	0.498919	0.483443	0.462767	0.462332	0.42915	0.399282	0.366013	0.321485
12	0.545748	0.57023	0.60233	0.614629	0.636264	0.671033	0.704158	0.702394	0.725401	0.746549	0.736665	0.736665	0.716665	0.717269	0.721001	0.723893	0.708479	0.681138	0.648015	0.629668	0.594256	0.567815	0.539817	0.513979	0.462353	0.452091	0.396578	0.379324	0.32303	0.251795
13	0.540079	0.579174	0.614058	0.641758	0.674662	0.684634	0.710113	0.731826	0.753067	0.771897	0.762903	0.746774	0.757661	0.765567	0.74237	0.700953	0.692762	0.672265	0.631432	0.608107	0.580093	0.569323	0.526664	0.498906	0.452317	0.450275	0.411416	0.373525	0.325135	0.291428
14	0.534389	0.583278	0.626782	0.65329	0.669165	0.717441	0.733927	0.753715	0.751869	0.788074	0.79241	0.793484	0.78147	0.7724	0.760879	0.747908	0.695809	0.684347	0.667943	0.629159	0.585711	0.558648	0.526607	0.516463	0.485082	0.447577	0.403959	0.394671	0.363528	0.307847
15	0.599019	0.630869	0.662422	0.704737	0.731894	0.743526	0.766998	0.771608	0.791738	0.791263	0.792115	0.797734	0.77727	0.769129	0.741391	0.720628	0.695646	0.667763	0.651579	0.608963	0.579163	0.537909	0.510209	0.477627	0.449254	0.408551	0.39169	0.333024	0.316486	0.292498
16	0.615056	0.629577	0.661788	0.700232	0.720562	0.75125	0.764528	0.786972	0.800355	0.803602	0.812083	0.794785	0.804716	0.793107	0.747277	0.724355	0.717914	0.681124	0.651996	0.620014	0.566966	0.52666	0.50264	0.471222	0.451988	0.428399	0.418808	0.379028	0.344381	0.282019
17	0.636466	0.659231	0.682017	0.719922	0.759172	0.788465	0.814064	0.823074	0.858325	0.846497	0.848983	0.844655	0.841473	0.815989	0.773469	0.738562	0.694836	0.659777	0.631931	0.590627	0.551522	0.523509	0.496914	0.466281	0.426302	0.40691	0.388483	0.374225	0.361009	0.283953
18	0.662692	0.676107	0.71298	0.758332	0.79617	0.80907	0.830692	0.844733	0.846609	0.842787	0.826527	0.826527	0.82022	0.803946	0.7613	0.739012	0.721718	0.672098	0.649718	0.622878	0.568066	0.534979	0.47273	0.473175	0.458485	0.42679	0.376813	0.36016	0.322598	0.294485
19	0.675462	0.716841	0.716841	0.78	0.804197	0.861719	0.859411	0.863142	0.879747	0.871073	0.891309	0.876602	0.820912	0.805411	0.805411	0.740857	0.705179	0.652647	0.625427	0.579161	0.549002	0.50926	0.469137	0.433012	0.424514	0.389689	0.379699	0.355722	0.335422	0.308753
20	0.655331	0.73239	0.75501	0.809929	0.830633	0.835455	0.8677	0.885593	0.89564	0.895485	0.901825	0.889124	0.863744	0.85734	0.813307	0.775665	0.717121	0.644467	0.6225	0.566447	0.566447	0.508464	0.473817	0.447536	0.414873	0.401879	0.370176	0.325056	0.325056	0.299908
21	0.694314	0.717477	0.77499	0.783775	0.839535	0.866007	0.880438	0.907919	0.933786	0.923717	0.909183	0.9037	0.862708	0.844672	0.780077	0.767275	0.695292	0.695292	0.634034	0.57451	0.551826	0.497301	0.497301	0.450574	0.420805	0.397386	0.348238	0.348238	0.313139	0.311099
22	0.702216	0.782369	0.820625	0.798423	0.829892	0.8804	0.8804	0.935442	0.957514	0.931987	0.92921	0.907885	0.880459	0.825513	0.804785	0.785525	0.718036	0.633329	0.633329	0.585522	0.531992	0.504022	0.468104	0.425978	0.407787	0.379897	0.365006	0.347658	0.316025	0.29661
23	0.729236	0.799556	0.820625	0.834533	0.859035	0.878073	0.878073	0.943148	0.926808	0.944218	0.942816	0.904284	0.882062	0.827891	0.799598	0.773917	0.72014	0.6481	0.6481	0.588381	0.54514	0.514834	0.488274	0.433527	0.42305	0.397358	0.367204	0.361549	0.318509	0.308481
24	0.730494	0.772951	0.83036	0.87765	0.899922	0.915184	0.911562	0.951813	0.952992	0.960043	0.931849	0.908914	0.89123	0.834262	0.784087	0.756394	0.707993	0.707993	0.652228	0.592211	0.558144	0.501486	0.501486	0.469985	0.444863	0.415502	0.375557	0.375557	0.343756	0.321303
25	0.730494	0.774926	0.843838	0.875834	0.912928	0.912928	0.955871	0.962745	0.949079	0.925349	0.92012	0.89956	0.857568	0.857568	0.805389	0.789696	0.709499	0.695034	0.625893	0.609392	0.582581	0.559257	0.521312	0.503452	0.447571	0.414698	0.363043	0.360798	0.331338	0.319281
26	0.762546	0.801496	0.801496	0.865549	0.892461	0.920685	0.942041	0.970066	0.978037	0.972824	0.922192	0.888887	0.874338	0.825582	0.825582	0.793403	0.737695	0.712262	0.697296	0.646658	0.566679	0.532303	0.495499	0.456633	0.431687	0.412965	0.386913	0.356159	0.344123	0.351051
27	0.759374	0.810219	0.844519	0.869364	0.892958	0.951986	0.970183	0.997724	0.977332	0.944994	0.930789	0.930789	0.918448	0.871301	0.844015	0.806558	0.750127	0.723759	0.698536	0.661767	0.593647	0.557021	0.532578	0.47492	0.438905	0.407546	0.378424	0.34736	0.331581	0.306011
28	0.751017	0.78618	0.834496	0.879372	0.907821	0.938495	0.958281	0.949404	0.947714	0.935727	0.945984	0.930033	0.905318	0.862195	0.833534	0.796362	0.745682	0.70488	0.68055	0.619604	0.593529	0.558084	0.521087	0.49	0.449466	0.419955	0.395026	0.365807	0.341127	0.29961
29	0.734631	0.769756	0.819501	0.872493	0.888645	0.92916	0.952744	0.931064	0.920217	0.942425	0.939735	0.928691	0.92195	0.887255	0.837946	0.78813	0.762814	0.747438	0.690934	0.651198	0.607149	0.563726	0.541714	0.52514	0.492338	0.462525	0.431517	0.396079	0.378232	0.347024
30	0.718686	0.75155	0.817488	0.866145	0.892423	0.915988	0.9308	0.935169	0.941276	0.948454	0.935373	0.914616	0.904406	0.874048	0.854938	0.815017	0.777357	0.75248	0.713348	0.676317	0.624858	0.581047	0.534745	0.494926	0.476929	0.455916	0.427001	0.395852	0.376681	0.369735
31	0.727526	0.745848	0.801875	0.843474	0.871901	0.937837	0.949042	0.953116	0.957536	0.956801	0.961002	0.938738	0.930357	0.886722	0.858159	0.823034	0.783116	0.75353	0.706985	0.693368	0.65124	0.604044	0.551961	0.526419	0.490532	0.465909	0.445417	0.419551	0.395713	0.378802
32	0.740456	0.77362	0.821072	0.851239	0.880983	0.941355	0.941319	0.95547	0.958881	0.954114	0.952673	0.936589	0.927311	0.887509	0.856037	0.821711	0.787837	0.767013	0.727774	0.684167	0.629761	0.589857	0.545645	0.519823	0.501892	0.473079	0.451429	0.420776	0.40156	0.372011
33	0.756094	0.788484	0.820634	0.877758	0.905254	0.952735	0.974425	1	0.988783	0.980703	0.968037	0.968037	0.950617	0.921524	0.883178	0.840089	0.792948	0.74392	0.725833	0.683941	0.659304	0.616633	0.563962	0.516325	0.490488	0.460864	0.452017	0.422795	0.394808	0.383416
34	0.767196	0.797547	0.797547	0.843767	0.884753	0.934112	0.964125	0.995175	0.984832	0.988926	0.952149	0.955062	0.951545	0.901686	0.901686	0.851753	0.826409	0.781565	0.716552	0.686149	0.647253	0.627707	0.600259	0.579198	0.535162	0.521118	0.489235	0.461087	0.453405	0.424277
35	0.73562	0.773715	0.810341	0.860589	0.889658	0.909013	0.946883	0.964478	0.974638	0.969872	0.948815	0.930902	0.894152	0.889693	0.882198	0.844696	0.803833	0.768526	0.740521	0.69685	0.69685	0.623914	0.592195	0.562502	0.557288	0.519628	0.503146	0.468744	0.468744	0.447448
36	0.757437	0.773142	0.814419	0.835383	0.859091	0.920124	0.933779	0.949821	0.9688	0.977055	0.954465	0.932102	0.925795	0.913929	0.844179	0.840251	0.795379	0.795379	0.73973	0.692931	0.678461	0.651614	0.651614	0.591833	0.565331	0.525473	0.483522	0.483522	0.449468	0.424471
37	0.724827	0.778828	0.78249	0.819814	0.847489	0.908802	0.908802	0.934948	0.947738	0.942081	0.925894	0.907993	0.919926	0.87493	0.845168	0.84987	0.789975	0.76218	0.76218	0.726485	0.678917	0.654899	0.641956	0.591926	0.579026	0.539514	0.523172	0.507129	0.466758	0.463023
38	0.706282	0.76187	0.78249	0.798412	0.855863	0.887542	0.887542	0.931028	0.9526	0.953302	0.930205	0.909684	0.913954	0.879222	0.84104	0.824173	0.782675	0.746459	0.746459	0.731376	0.685375	0.659251	0.648455	0.624358	0.601986	0.580448	0.554316	0.529113	0.500008	0.483542
39	0.689885	0.728057	0.769587	0.782166	0.844076	0.868331	0.894901	0.884236	0.880105	0.915642	0.929542	0.922762	0.889581	0.894051	0.839771	0.811541	0.774383	0.774383	0.736933	0.723633	0.687238	0.658076	0.658076	0.637746	0.594126	0.574715	0.55159	0.55159	0.524347	0.499988
40	0.689885	0.713388	0.768349	0.786659	0.835502	0.835502	0.863498	0.878979	0.886214	0.899267	0.905764	0.898875	0.881728	0.881728	0.83156	0.820513	0.781664	0.759536	0.736032	0.700009	0.676631	0.661492	0.6241	0.619827	0.591767	0.585265	0.565889	0.548652	0.526342	0.515586
41	0.702502	0.719965	0.719965	0.765361	0.780145	0.818892	0.837008	0.839914	0.879404	0.888512	0.894306	0.875276	0.864002	0.849278	0.849278	0.811121	0.790273	0.764328	0.739955	0.734791	0.692977	0.671616	0.664814	0.649581	0.633911	0.631286	0.605797	0.578927	0.561903	0.53016
42	0.660794	0.689108	0.73004	0.754964	0.758563	0.788916	0.813653	0.846927	0.875613	0.883398	0.868573	0.868573	0.858736	0.866399	0.841725	0.813784	0.780163	0.750482	0.737419	0.696839	0.695166	0.668614	0.633888	0.615428	0.607373	0.599884	0.592189	0.576991	0.574057	0.564874
43	0.628273	0.663499	0.692773	0.728451	0.751858	0.78473	0.814177	0.838233	0.874581	0.874011	0.869068	0.858128	0.81738	0.794009	0.773397	0.765454	0.74227	0.733951	0.724881	0.69279	0.677603	0.650124	0.647987	0.648515	0.636884	0.62817	0.626088	0.604154	0.589285	0.566343
44	0.621823	0.637524	0.684567	0.709356	0.747903	0.764527	0.802889	0.813905	0.831753	0.830898	0.857115	0.832945	0.82004	0.767445	0.754786	0.740027	0.731437	0.723792	0.710037	0.676236	0.690588	0.681835	0.667672	0.659565	0.648437	0.62252	0.611824	0.598637	0.596701	0.573107
45	0.585446	0.618394	0.649977	0.692164	0.714261	0.747968	0.769518	0.802085	0.792323	0.786236	0.807595	0.803179	0.803002	0.776671	0.760338	0.74652	0.746849	0.72399	0.715152	0.69902	0.688599	0.677892	0.65939	0.655085	0.644587	0.622844	0.616162	0.595557	0.587281	0.573441
46	0.576342	0.614762	0.643787	0.680332	0.707412	0.742961	0.763085	0.792299	0.781286	0.800951	0.806256	0.802184	0.791302	0.767033	0.771984	0.747493	0.749131	0.734988	0.736197	0.73122	0.714958	0.689599	0.668405	0.652726	0.654063	0.633564	0.607811	0.594036	0.568261	0.565842
47	0.58301	0.601691	0.635046	0.656381	0.6833	0.728222	0.750629	0.778295	0.786557	0.809994	0.795554	0.785542	0.767442	0.767611	0.761878	0.741678	0.737833	0.727582	0.71641	0.69512	0.679471	0.672729	0.655014	0.635615	0.628846	0.613371	0.61626	0.608801	0.597403	0.590592
48	0.572571	0.599569	0.627674	0.663994	0.692387	0.72537	0.759637	0.783083	0.781287	0.775061	0.775653	0.775653	0.76744	0.771997	0.759974	0.738339	0.730267	0.739413	0.739832	0.721418	0.706087	0.692609	0.662313	0.645887	0.633441	0.617292	0.614014	0.612607	0.597165	0.597036
49	0.566426	0.597478	0.597478	0.637603	0.671008	0.717877	0.732227	0.76006	0.740119	0.75107	0.773317	0.772867	0.766037	0.728608	0.728608	0.727345	0.713652	0.702505	0.707174	0.706771	0.691654	0.674149	0.654478	0.657677	0.656455	0.638074	0.635117	0.627921	0.6157	0.600447
50	0.538404	0.556473	0.6011	0.652767	0.679412	0.679412	0.706164	0.733571	0.743631	0.748971	0.751647	0.759691	0.739039	0.739039	0.730231	0.725707	0.705752	0.685256	0.680692	0.661432	0.674408	0.672316	0.655759	0.640386	0.642772	0.629196	0.634148	0.633776	0.626053	0.621671
51	0.538404	0.562606	0.588317	0.630684	0.667937	0.685455	0.680596	0.70163	0.723864	0.760502	0.74566	0.749605	0.764713	0.758428	0.736677	0.743957	0.706975	0.706975	0.699388	0.67768	0.682308	0.676557	0.676557	0.670729	0.651838	0.642606	0.641951	0.641951	0.64224	0.640814
52	0.508093	0.566922	0.56997	0.607435	0.6503	0.67116	0.67116	0.691887	0.732506	0.742678	0.747742	0.7544	0.755709	0.74477	0.751784	0.725732	0.717858	0.698536	0.698536	0.692836	0.68819	0.698557	0.696426	0.677756	0.65091	0.643783	0.648828	0.635264	0.627862	0.627312
53	0.494636	0.545858	0.56997	0.594267	0.618976	0.668345	0.668345	0.679459	0.722482	0.735434	0.752878	0.764625	0.767482	0.750169	0.747733	0.7678	0.728591	0.713835	0.713835	0.721166	0.690117	0.705243	0.691447	0.678159	0.68426	0.682252	0.667706	0.648164	0.624682	0.618574
54	0.497768	0.517895	0.549541	0.566459	0.604666	0.630693	0.645703	0.668204	0.714998	0.728131	0.733347	0.755925	0.760669	0.765778	0.762402	0.753521	0.73889	0.73889	0.727313	0.715684	0.705123	0.680852	0.680852	0.683137	0.648002	0.651975	0.64183	0.64183	0.618408	0.605743
55	0.484364	0.504004	0.518033	0.566223	0.572293	0.581885	0.628987	0.658485	0.691709	0.723813	0.7138	0.734846	0.738684	0.738209	0.744336	0.75019	0.745236	0.722412	0.708285	0.696459	0.696459	0.675086	0.677689	0.661792	0.656639	0.668364	0.656705	0.636754	0.636754	0.626099
56	0.501448	0.529484	0.529484	0.554733	0.559715	0.597008	0.620848	0.666518	0.691127	0.716245	0.722658	0.704896	0.705934	0.710573	0.710573	0.725758	0.707105	0.701205	0.693781	0.682935	0.687705	0.680563	0.691809	0.676862	0.648373	0.650624	0.635161	0.626577	0.630327	0.628568
57	0.488913	0.504674	0.52142	0.547697	0.573889	0.618055	0.653376	0.667373	0.66817	0.691355	0.723066	0.723066	0.743099	0.741718	0.736715	0.728385	0.708266	0.695982	0.698629	0.707637	0.695585	0.675896	0.668447	0.640278	0.624598	0.617433	0.601838	0.595738	0.573124	0.56138
58	0.479571	0.483531	0.492518	0.528577	0.564178	0.612284	0.641207	0.650942	0.645916	0.662987	0.688252	0.71299	0.737018	0.731515	0.737065	0.750078	0.757097	0.735358	0.71055	0.677183	0.657151	0.65969	0.648828	0.631191	0.6525	0.62853	0.621515	0.595704	0.55726	0.544434
59	0.459861	0.480059	0.497303	0.527118	0.55437	0.571676	0.608621	0.616161	0.620286	0.65199	0.662132	0.676463	0.69815	0.708893	0.70481	0.727408	0.734365	0.698329	0.676889	0.65939	0.652729	0.643503	0.651093	0.653066	0.63875	0.637755	0.606601	0.591763	0.569102	0.539809
