# Supplementary material for: Unexpected long-term variations of Saturn’s ring current revealed by energetic neutral atom imaging
Source: Research Square preprint supplement (doi:10.21203/rs.3.rs-3271171/v1), 2023-09-18
Supplement: Supplementary file 19 [file c90be2a52f0bdbbec08d7d5d.xlsx]

## Sheet: Period7_ENA density
	0	1	2	3	4	5	6	7	8	9	10	11	12	13	14	15	16	17	18	19	20	21	22	23	24	25	26	27	28	29	30	31	32	33	34	35	36	37	38	39	40	41	42	43	44	45	46	47	48
0	1.05617	1.30324	1.07803	1.06594	1.36724	1.2178	1.19855	1.27632	1.67529	1.6068	1.77138	1.48739	1.60149	1.60195	1.62971	1.9398	1.93489	1.9537	2.10756	2.14717	1.96112	1.82829	1.58944	1.9495	2.01199	2.00267	2.11791	1.98956	1.68449	1.17338	1.61938	1.74725	1.8456	1.9043	2.13342	2.18741	2.18741	2.23545	2.25411	2.18741	1.89777	2.03764	2.06094	1.74636	1.42942	1.44072	1.7215	1.89047	2.31993
1	1.32113	1.27802	1.44128	1.45115	1.40348	1.77342	1.79016	1.74733	1.48527	1.70781	1.96559	1.78685	1.73076	1.70781	1.8493	2.01617	2.58832	2.66785	2.34963	2.54567	2.54734	1.95001	1.93521	1.84097	1.86449	1.99885	2.00268	2.28367	2.32485	1.92604	1.82277	1.86276	1.83472	2.05789	1.94857	1.90971	1.9668	1.81559	2.14165	2.03109	2.25941	2.29572	2.38292	1.94917	1.82994	1.59331	1.61175	2.12293	2.07616
2	1.1555	1.37425	1.45945	1.64127	1.78717	1.85505	1.99234	1.80147	1.8532	1.70781	1.77811	1.79131	2.11433	2.11216	2.58062	2.58463	2.58184	2.89853	2.98224	2.62607	2.7188	2.28734	1.93521	2.00492	2.13837	1.96684	2.06142	2.31895	2.375	2.28505	2.64153	2.25032	1.82277	1.81467	1.82277	1.63853	2.01593	2.10301	1.91939	2.43024	2.69721	2.5097	2.45572	2.41101	1.80416	1.76955	2.1032	2.15509	2.07228
3	1.59529	1.48501	1.70277	1.5534	1.83918	1.9104	1.83469	1.77838	1.80646	1.77838	1.77865	1.97905	2.39361	2.59276	2.7272	2.79964	3.03392	2.99441	3.01975	3.05399	2.90234	2.65727	2.58332	2.22452	1.98928	2.07383	2.21559	2.45845	2.32327	2.32198	2.33385	2.37764	2.30913	1.80418	1.78351	1.9722	1.80216	1.80605	2.15877	2.19877	2.46483	2.55103	2.23916	2.32635	2.27672	2.1436	1.81894	2.026	2.05661
4	1.71891	1.70016	1.679	1.67912	1.77468	1.77811	1.77468	1.70023	1.74132	1.77369	2.06964	2.11433	2.59345	2.66721	2.56265	2.59202	2.58161	2.70394	2.61842	2.80913	2.9129	2.90234	2.23552	2.56872	2.5104	2.04955	2.04249	2.05253	2.51693	2.73387	2.71987	2.61322	2.29138	2.22753	1.98946	2.30025	2.16508	2.05817	2.23841	2.5924	2.34115	2.23108	2.37964	2.63303	2.36021	2.10444	2.12251	1.98545	2.098
5	1.79919	1.90642	1.81737	1.80148	1.80154	1.62152	1.73215	1.74131	1.7267	1.70779	2.08745	2.12617	2.23357	2.3729	2.48381	2.56163	2.29123	2.51552	2.59528	2.5192	2.45046	2.61544	2.89197	2.67287	2.35323	2.40822	2.20667	2.08715	2.51131	3.00722	2.71649	2.89545	2.76813	2.70759	2.55912	2.43079	2.46671	2.24423	2.28717	2.35271	2.78924	2.67883	2.64151	2.71331	3.00848	2.75734	2.67466	2.64868	2.12772
6	1.80148	2.09898	1.82277	2.17452	1.8929	1.80181	1.92531	1.79149	1.84046	1.8817	2.1264	2.33873	2.32769	2.34616	2.25432	2.29123	2.15867	1.98565	2.06083	2.11272	2.09619	2.37134	2.51296	2.60766	2.32452	2.14593	2.36106	2.33932	2.64096	2.58748	2.70529	2.68815	2.77072	2.93983	2.83191	2.81282	2.95741	2.97076	2.89874	2.77345	2.73765	3.01147	2.77826	2.85425	2.91501	3.06964	2.82621	2.6864	2.70835
7	1.88801	1.82277	2.03295	2.20546	2.43933	2.46699	2.26566	2.19911	2.17452	2.12221	2.1294	2.32769	2.42681	2.56176	2.36868	2.248	2.16222	2.11498	1.70936	1.89403	2.10136	2.23569	2.33208	2.08706	2.10223	2.3186	2.50528	2.34951	3.0194	2.96873	3.11113	3.03731	2.84197	2.81177	2.96592	2.99164	2.97452	3.26947	3.13283	2.9586	2.9586	2.86388	3.09318	3.14957	2.93686	2.89894	2.83498	2.85347	2.88923
8	2.14426	2.29706	2.29706	2.30572	2.30755	2.47368	2.43155	2.39331	2.39435	2.37633	2.14496	2.17452	2.32756	2.43188	2.43885	2.43352	2.25249	2.06924	2.1264	2.12069	2.11498	2.06587	2.30829	2.21011	2.33477	2.33179	2.47159	2.87808	2.89155	2.98757	2.77639	2.68315	2.61862	2.71338	2.99164	3.09437	3.28754	3.3385	3.30181	3.19554	3.27725	3.1673	2.95933	3.05287	2.90407	2.96192	2.83118	2.87597	3.16352
9	2.0025	1.92223	2.3375	2.40089	2.20243	2.44096	2.31149	2.41205	2.41205	2.24781	2.45144	2.34175	2.21787	2.22881	2.31046	2.36199	2.55947	2.40176	2.25361	2.12069	2.1264	2.24735	2.27754	2.13235	2.34944	2.40382	2.53164	2.55879	2.74102	2.91116	2.87363	2.82083	2.73011	2.85669	2.99256	2.99257	3.11478	3.0823	3.09535	2.9689	3.23826	3.23657	3.51097	3.23819	3.1633	3.14522	2.95697	2.93862	3.0597
10	2.33923	2.12349	2.14857	2.28807	2.45052	2.30943	2.44096	2.44058	2.40307	2.5992	2.25192	2.25204	2.16987	2.24054	2.36182	2.46168	2.7659	2.76779	2.58429	2.36199	2.33907	2.12539	2.53313	2.66424	2.34108	2.40641	2.56868	2.6739	2.73361	2.88102	2.95559	3.17288	3.07574	2.95916	2.99164	2.99164	2.99164	2.99164	2.91096	2.96957	3.10732	3.24846	3.30672	3.2135	2.95935	3.19347	3.10892	3.4033	3.22248
11	2.59111	2.6409	2.32756	2.27909	2.36423	2.29767	2.48689	2.57291	2.45037	2.39331	2.48446	2.29326	2.27815	2.33118	2.45845	2.58429	2.51496	2.47597	2.47664	2.42616	2.36199	2.4553	2.44474	2.56475	2.58184	2.61592	2.767	2.88208	2.97678	3.07293	3.20076	3.20299	3.40084	3.1919	3.0367	2.99164	2.99164	2.9931	2.99267	2.79581	2.99028	3.04968	3.29242	3.4008	3.44642	3.5376	3.24451	3.52848	3.43423
12	2.59069	2.59111	2.59626	2.79417	2.55793	2.48387	2.26563	2.48666	2.57291	2.60317	2.58606	2.57291	2.6224	2.48797	2.44198	2.41873	2.60043	2.36244	2.2534	2.3053	2.44303	2.54122	2.62582	2.51496	2.44933	2.69934	2.90558	2.87083	2.95841	3.13102	3.2052	3.69177	3.67135	3.59656	3.3372	3.34109	2.99215	3.02375	2.99164	2.96584	2.94961	3.0148	3.37162	3.73517	3.46846	3.27386	3.14766	3.52109	3.2262
13	2.58358	2.59224	2.61003	2.61871	2.70907	2.69103	2.61035	2.54649	2.63133	2.70835	2.61657	2.57291	2.49797	2.57291	2.45869	2.51352	2.51778	2.50633	2.43676	2.34506	2.44689	2.5992	2.69694	2.61657	2.91913	2.98442	3.15583	3.32071	3.26732	3.26585	3.33808	3.23117	3.24873	3.30079	3.25768	3.21692	3.18441	2.99371	2.92549	3.00242	3.02366	2.99068	3.14147	3.55456	3.56357	3.08848	3.55545	3.28672	3.5623
14	2.58271	2.59027	2.59027	2.70885	2.60135	2.57144	2.58713	2.61493	2.70835	2.70835	2.61702	2.57537	2.56374	2.61747	2.57291	2.67595	2.66853	2.51939	2.61142	2.60869	2.61657	2.66463	3.00048	3.09362	2.93701	3.08231	3.08245	3.0837	3.13796	3.34592	3.46147	3.58311	3.57763	3.25683	3.20745	3.21886	3.20573	3.3619	3.35149	2.98992	2.7774	2.89487	3.06474	3.14165	3.34129	3.60626	3.76605	3.76524	3.52542
15	2.5933	2.59111	2.61871	2.65773	2.61871	2.61871	2.69813	2.66427	2.68911	2.70835	2.83972	2.57904	2.57291	2.57291	2.57291	2.59273	2.75236	2.62592	2.68069	2.66721	2.69694	2.76776	2.87605	3.06244	3.11092	3.22776	3.3558	3.48415	3.47959	3.46147	3.46266	3.8717	3.59169	3.3611	3.22656	2.87089	3.18384	3.22727	3.76433	3.2184	2.99164	3.14182	3.18462	3.40255	3.14182	3.5813	3.61905	3.61806	3.62515
16	2.61924	2.59118	2.5732	2.58984	2.60135	2.64823	2.785	2.76262	2.85192	2.81135	2.73409	2.99662	2.88433	2.77723	2.90017	2.96538	2.78083	2.77152	2.75718	2.76865	2.76865	2.97145	3.08245	3.20795	3.0837	3.08216	3.39262	3.24855	3.50876	3.44957	3.46147	3.46266	3.82348	3.65042	3.59169	3.4341	3.31078	3.36109	3.24049	2.92575	3.0878	3.21219	3.37706	3.14222	3.09943	3.27915	3.48199	3.75193	3.90274
17	2.72383	2.58738	2.68605	2.60601	2.5933	2.63401	2.60135	2.69722	2.89166	2.84887	2.78051	2.5992	2.70835	2.84848	3.03604	2.83177	2.82575	2.87144	2.97044	3.06977	3.20299	3.24664	3.26987	3.62445	3.64107	3.49985	3.65405	3.50568	3.40611	3.72415	3.65394	3.85883	3.67608	3.8569	3.65886	3.81276	3.88123	3.4467	3.38824	3.34388	3.28777	3.21899	3.33798	3.2743	3.46434	3.50722	3.15376	3.60597	4.0739
18	2.65784	2.75318	2.61069	2.61069	2.64782	2.70667	2.61536	2.61201	2.817	2.60174	2.61411	2.54762	2.58362	2.75569	2.89925	2.87918	3.03332	3.06308	3.06564	3.46475	3.50327	3.64198	3.79739	3.60929	3.63298	3.48199	3.54215	3.65416	3.7416	3.79485	3.99889	4.08838	3.86291	3.8182	3.92685	3.90629	3.80605	3.59169	3.79044	3.6083	3.61537	3.53558	3.20696	3.4778	3.96522	3.86867	3.76779	3.78715	4.23058
19	2.76071	2.62655	2.85014	2.64931	2.64931	2.61254	2.69089	2.43144	2.43499	2.61859	2.62342	2.72992	2.85594	2.71966	2.60669	3.01129	3.10225	2.76787	3.03703	3.03679	3.42278	3.38285	3.40059	3.24903	3.23927	3.5957	3.60342	3.65394	3.80126	3.8182	3.82691	4.07188	4.16018	4.25557	4.12494	3.94263	3.90436	4.15679	4.18853	3.75622	4.00918	3.91514	3.62511	3.80493	3.99936	4.01425	3.84147	4.22478	4.84601
20	2.75403	2.75524	2.82627	2.7406	2.72949	2.83624	2.7859	2.75686	2.71105	2.7636	2.77203	2.84755	2.92295	2.75418	2.66641	2.68644	2.7289	2.87551	2.94371	3.15446	3.20769	3.14887	2.89478	3.1207	3.43225	3.21679	3.16922	3.54791	3.83964	3.84138	3.82186	3.88002	3.91596	4.24251	4.157	4.00473	4.0529	4.55504	4.42524	4.28929	4.17274	4.02027	4.19093	4.19148	4.34904	4.39543	4.67924	4.69243	4.88219
21	3.00757	2.9817	2.89638	2.73722	2.78336	2.76753	2.76753	2.77604	2.65574	2.61937	2.85769	3.03762	2.9429	2.90301	2.84271	2.73249	2.81357	2.65724	2.96627	3.39569	3.20546	3.2236	3.38179	3.41706	3.41783	3.06308	3.02108	2.94054	3.47035	3.73426	3.88888	4.14313	3.80807	3.85359	4.01601	4.33863	4.42644	4.55541	4.55272	4.5502	4.45781	4.49636	4.47724	4.58437	4.78515	4.93361	5.0408	5.25955	5.00942
22	2.84626	2.90214	2.93414	2.89592	2.83934	2.8021	2.75256	2.76825	2.79666	2.9429	2.79848	2.7975	2.91046	2.83554	3.10689	3.16743	3.04735	3.01587	3.2085	3.1891	3.27536	3.41236	3.48513	3.13358	3.04179	3.05688	3.41898	3.45763	3.6753	3.81771	3.81189	3.81815	3.85549	4.11983	4.16811	4.70707	5.06273	5.07769	5.04305	4.91253	4.78311	4.75767	4.86469	4.92705	5.14148	5.65462	5.64735	5.79252	5.75043
23	2.61023	2.62537	2.87399	2.78392	2.78392	2.70277	2.67971	2.71938	2.7458	2.7822	2.7975	2.83136	2.93925	2.90719	3.11373	3.05321	3.23135	3.23675	3.38529	3.19696	3.58877	3.576	3.45669	3.17121	3.19263	3.54077	3.59152	3.89262	4.07898	3.75156	3.84294	3.87978	4.32922	4.94254	4.80244	5.01951	4.96901	5.02771	5.02231	5.09719	5.27165	5.3131	5.25632	5.44857	5.09392	5.49447	5.66907	5.87784	5.87158
24	2.6735	2.58617	2.58294	2.70283	2.72876	2.98568	2.89287	2.74706	3.01632	2.91481	2.81418	2.79747	3.00153	3.10795	3.12976	3.37548	3.53315	3.7843	3.9482	3.65586	3.58714	3.53812	3.54893	3.5571	3.34462	3.72798	3.919	3.919	4.21706	4.66065	5.05707	4.34029	4.91768	5.01882	5.38387	5.11345	5.29843	5.30899	5.62649	5.71568	5.86616	6.56978	6.32502	5.90537	5.80573	5.92694	6.22201	6.43308	6.58665
25	2.54849	2.54387	2.71855	2.8783	2.95422	2.75019	3.29874	3.25526	3.12813	3.02335	3.01086	2.94084	3.00581	3.29523	3.20671	3.5993	4.00845	4.14484	3.94081	3.96393	3.74	3.56356	3.56367	3.4512	3.93973	3.8822	4.14706	4.55545	5.0229	4.97044	5.14753	5.12444	5.23654	5.18326	5.50006	5.39953	5.34102	6.50904	6.04486	6.36899	6.48724	6.80624	7.21207	7.66457	7.75443	7.82823	7.84262	7.88503	7.86712
26	2.68896	2.66275	2.7274	2.94604	3.10412	3.34691	3.29641	3.19577	3.05325	2.98918	3.02298	3.01086	3.35444	3.41444	3.65164	4.20224	4.45132	4.17074	4.17565	3.92466	3.61587	3.40374	3.45757	4.16056	4.31766	4.01267	4.28014	4.64157	5.14545	5.1786	5.58471	5.99096	5.96988	5.86575	5.69903	5.69583	5.70426	6.37016	7.04891	8.10149	8.44403	10.0282	8.18108	9.67641	9.86205	10.639	9.35483	9.76527	10.1312
27	2.70835	2.70835	2.64531	2.7781	3.11468	2.99713	3.01053	3.03874	3.04312	2.98548	3.03396	3.21357	3.38527	3.86708	4.02458	6.05056	5.03113	4.18314	4.10583	3.71125	3.72652	3.76114	4.00052	4.2056	4.24942	4.40846	4.6944	4.72153	5.06643	5.47519	6.06951	6.33127	6.14308	6.4149	6.57557	6.80216	6.31143	7.21346	7.6837	9.85787	10.171	11.5892	11.9542	12.2481	12.3099	14.1931	14.8471	13.9972	13.886
28	2.70835	2.70835	2.70835	2.70835	2.84365	3.27005	2.98122	2.87969	2.83304	3.21477	3.50163	3.43811	3.63851	4.90423	4.77357	5.72643	4.85401	3.6731	3.82116	3.41111	3.76795	4.32406	4.15547	4.04693	3.98575	4.67847	5.18452	5.02799	5.14042	5.46704	5.50363	6.03669	6.59073	6.61444	8.79175	8.48067	8.04494	7.60337	7.93764	11.1638	13.369	14.4369	14.9364	14.3812	13.8486	15.5069	16.9532	16.6735	16.0149
29	2.78301	2.711	2.7541	2.711	2.71961	2.91987	2.74776	3.13081	2.96627	3.27096	3.30521	3.65442	3.50854	3.99679	4.54385	4.69311	3.96154	3.58716	3.56305	3.45988	4.16023	4.5593	4.64197	4.59693	4.49457	5.05551	5.18523	5.31246	5.62237	5.67042	5.66467	6.11001	7.80661	8.81687	8.98129	9.25948	12.4942	12.4053	11.1201	12.5472	13.5358	15.0706	15.8059	15.8172	15.1484	17.2511	19.3566	18.785	17.6553
30	2.70835	2.78224	2.85874	2.91722	2.83304	2.81812	2.87499	2.93501	3.25283	3.26535	3.61054	3.64415	4.01206	4.22042	4.37613	4.24376	4.15673	3.82262	3.66965	3.66715	4.27513	4.20019	4.76217	4.80522	4.94679	4.92606	5.10296	5.6315	5.84115	5.88576	6.00001	6.87549	8.81387	10.2319	9.53325	13.5604	14.7808	14.2096	14.1918	14.689	14.7988	15.2251	16.915	17.6888	17.7417	19.5991	20.9673	20.0898	21.7134
31	2.80026	3.1329	2.8038	2.80734	2.91722	2.83304	2.95419	3.04457	3.17526	3.62633	3.94676	4.08291	4.04936	4.05772	4.28511	4.4159	4.2426	4.35239	4.36849	4.11514	4.3608	4.66097	5.22381	5.60163	5.4875	5.61969	5.62397	5.80484	5.96086	6.67421	7.63677	9.21111	9.86597	11.9355	12.4254	14.766	15.2814	16.0549	15.9783	16.7632	17.538	17.2092	18.5084	20.5807	21.2568	21.4245	20.6787	21.603	22.7233
32	3.16411	3.27373	3.28599	3.0639	2.88837	2.88955	2.87808	3.16381	3.37982	3.66797	3.83546	3.83967	4.19235	4.35174	4.41609	4.57336	4.44641	4.61634	4.62252	4.62329	4.62252	4.37557	5.20761	5.66528	5.65268	5.84378	5.68224	6.26824	7.64918	8.62007	8.66803	11.9317	13.5627	14.2368	12.7254	15.6704	16.1664	16.3225	17.5943	18.8414	19.5772	20.4273	21.1205	21.9723	23.2769	24.278	23.8672	25.539	25.984
33	3.35629	3.28497	3.16638	3.11401	3.06308	3.13813	3.1665	3.40045	3.43572	3.60078	3.65433	4.08972	5.06205	4.58053	4.58736	4.65655	4.06803	4.21618	4.6347	4.62329	4.95987	5.02397	5.65677	5.8714	6.01866	6.47477	6.86408	7.27615	9.68903	11.1862	13.1376	15.0121	15.0453	14.0641	15.3017	15.8722	16.2442	17.5214	18.125	19.6442	21.5194	22.0374	24.3505	24.4659	25.1332	26.2644	27.1295	27.9714	27.2217
34	3.35629	3.35629	3.35629	3.29919	3.17637	3.27046	3.29674	3.40435	3.50139	3.97974	4.4398	5.74775	5.19133	5.62638	5.12991	4.64657	4.70152	4.58194	4.89966	5.16682	5.39149	5.84969	6.23136	6.4238	7.77309	10.4414	11.9003	11.1622	11.1004	13.6003	14.0392	14.1996	14.9772	16.2032	17.1505	17.2378	17.9972	20.3146	20.4482	21.8838	23.4416	23.9525	24.7248	26.4705	27.299	27.7122	28.5093	29.7258	30.6502
35	3.35629	3.3063	3.35629	3.35629	3.35629	3.43407	3.50734	3.51104	3.54264	4.67809	6.49694	5.26071	5.0577	4.75818	4.89673	5.1497	5.06876	5.22323	5.39408	5.62088	5.47133	5.92868	6.57686	7.90995	8.95742	11.057	12.0916	14.1265	14.684	15.8232	15.6712	14.8075	15.1813	16.329	16.9115	18.6153	20.9765	21.4706	22.0622	23.8911	26.2805	26.5534	26.9897	28.3681	28.608	30.0017	30.9309	30.9754	31.8267
36	3.35629	3.35742	3.35629	3.35742	3.49702	3.66764	3.72028	3.96324	4.67529	5.49583	6.06689	6.73954	4.90224	4.90073	4.90073	5.27516	5.51617	5.59974	5.99208	5.80326	5.71903	6.40435	6.6292	8.32243	12.8382	11.4889	12.8354	14.1401	15.8618	16.618	17.1068	15.9507	15.7762	17.0003	18.2089	21.9346	23.0431	24.1184	25.699	26.6023	27.2122	27.9029	29.1829	30.8627	31.1678	31.906	33.0756	34.3699	34.118
37	3.35629	3.36369	3.3984	3.464	3.66428	5.23547	6.66676	6.18634	6.19724	7.1347	6.81699	6.20112	5.38472	5.37925	5.53597	5.77358	5.64926	5.93336	6.11105	6.57995	6.61298	7.12695	7.81383	8.96445	12.3718	13.7537	14.9329	15.0783	16.1484	17.4476	17.821	18.0823	18.9589	19.453	21.3096	23.1764	25.729	26.1212	26.98	27.1179	28.7857	29.9061	32.0141	32.3765	34.2726	34.0814	36.0039	36.1995	37.2887
38	3.27699	3.46035	3.464	3.57651	3.8326	4.7309	7.20996	8.15299	8.63131	5.77277	4.88235	5.20107	5.072	5.24395	5.42392	5.7516	5.65808	5.69399	6.14256	6.5918	8.44775	10.8262	9.87676	10.0868	14.7885	14.8591	14.6142	15.2586	17.4904	17.279	18.5634	19.788	21.0102	23.4995	23.7376	24.9911	26.1566	28.0654	29.5808	30.0472	31.5343	33.6691	35.8261	35.5124	35.9583	37.11	37.0182	37.8631	39.5539
39	3.35579	3.41836	3.58569	3.92485	3.77138	4.14834	5.45538	5.34228	6.00285	6.24341	6.21746	5.05032	5.06135	5.27388	5.30273	5.49067	5.65107	6.02369	6.50898	7.22653	7.81909	9.85255	10.5732	13.0053	14.1813	15.6801	15.0941	16.0256	16.911	18.6813	20.0237	21.1647	22.5359	23.34	25.1525	25.5921	27.3359	28.2272	30.1965	32.2449	33.8897	36.995	37.3554	36.9536	37.7924	40.4477	40.4035	41.3455	41.7311
40	3.269	3.61153	3.54001	3.76932	3.83254	4.51523	4.31165	4.60968	5.06769	5.8594	5.87012	6.79876	5.95398	5.6761	5.52074	5.60552	5.84873	6.08557	6.76995	7.87244	9.04775	11.0594	10.9654	12.8565	15.1363	14.9428	15.6332	17.5184	18.6821	19.4023	19.8764	21.9524	22.4626	22.5319	25.6987	27.0114	27.7134	30.1273	31.3062	34.5427	36.7129	39.4622	39.3368	40.0159	40.9835	42.6867	43.3909	42.9975	44.2904
41	3.26477	3.269	3.63616	3.64903	4.2059	4.28851	4.5826	5.34804	5.53557	5.26565	5.15448	5.43397	6.08762	6.08007	5.84184	5.84732	5.96259	6.32694	6.7481	7.59888	8.70321	11.3072	13.9686	13.2176	13.6418	14.333	17.5049	19.0968	19.5026	21.1934	21.7683	22.0223	23.8908	25.4693	26.565	28.1589	29.8533	33.2715	33.951	36.5628	38.7215	40.2292	42.1614	43.3032	43.72	44.5351	45.8672	46.5176	46.9969
42	3.40171	3.29704	3.58997	4.02568	4.27549	4.33043	4.48182	4.68166	4.92624	5.32484	6.15171	5.70462	5.24825	5.06211	5.37509	5.84873	6.11637	6.31626	6.94024	7.47877	9.47499	13.2	13.7031	15.4386	14.8928	17.06	18.091	19.65	20.2212	21.8326	22.1039	23.1375	25.3871	27.1772	29.7766	31.7242	33.1595	35.4819	37.257	39.2123	41.2703	42.373	45.1017	46.1548	46.1945	47.1322	47.6153	48.2301	49.1353
43	3.58997	3.82286	3.94237	4.27141	4.23898	4.44381	4.47859	4.68998	5.33537	6.79715	6.83691	6.77664	5.56351	5.25474	5.28531	5.81933	6.97314	8.54873	8.06738	9.88326	12.1213	15.0421	15.3947	16.5017	17.2752	18.3237	20.2048	20.5166	21.628	23.4882	23.2972	26.3296	26.3823	29.6951	30.4117	33.6514	35.698	38.1028	39.0395	41.9995	43.5152	44.8235	46.3412	47.5703	49.1516	50.2346	49.6878	50.1707	49.8267
44	3.72707	3.88188	4.18962	4.51074	4.40717	4.48844	4.65833	4.82244	5.29316	5.63673	5.47311	5.79356	5.7095	5.60094	6.03866	5.97036	7.23775	8.07009	12.1066	9.58327	12.5377	15.2542	15.2967	16.9356	17.9133	19.1408	21.2966	22.2564	22.6881	25.2032	25.6449	27.9332	29.5582	30.89	32.2391	34.9681	37.6523	40.5218	42.3304	44.8416	46.3846	47.1018	49.8489	50.1493	50.9935	51.8967	51.0107	51.4887	50.2862
45	3.89896	4.23835	4.38367	4.29774	4.37207	4.5476	4.97639	5.14905	4.93508	4.92541	5.38327	5.64987	5.06534	5.59422	6.35737	6.76899	7.90165	8.25459	9.97714	9.66618	13.8654	13.4154	14.7352	17.3955	19.073	21.079	22.2093	23.001	24.7813	26.2419	27.9022	29.5857	31.3561	33.49	36.3915	38.892	40.1899	42.3466	45.0429	46.8045	48.7359	50.3233	52.1111	52.5688	52.226	51.9344	51.8243	50.4665	49.6738
46	4.18662	4.26233	4.39308	4.46828	4.7785	4.84516	4.84046	4.84551	5.08962	5.32017	5.31288	5.46334	5.50661	5.99067	6.44116	6.95092	7.20527	8.30164	9.06782	9.1777	12.2365	14.9887	17.7901	19.0039	20.2231	21.5906	23.6287	24.7418	26.9705	28.7672	29.6217	31.7382	32.5626	35.0236	39.5021	40.1855	41.4937	43.3401	46.4157	48.2217	51.4726	52.9317	53.3299	53.0326	52.7903	52.5596	52.5703	51.1819	48.8729
47	4.01694	4.3308	4.38538	4.65532	4.58227	4.78479	4.59964	4.95361	5.10197	5.11764	5.2517	5.39173	5.61312	5.98544	6.29993	6.4384	6.69914	7.48851	8.5046	10.8001	13.7964	16.4893	18.068	20.0992	20.7947	21.3751	24.4082	25.6186	26.5714	29.3586	30.6863	32.8886	35.6568	37.5468	39.2141	40.6541	42.5489	45.2297	49.093	50.9016	52.4768	53.1754	54.597	54.6146	54.8506	54.676	53.6437	50.5132	50.6173
48	4.12958	4.29238	4.62287	4.5242	4.56552	4.58619	4.47336	4.54758	4.71426	4.86965	5.20034	5.5157	6.0598	6.42707	6.43174	6.96998	7.41147	7.6732	9.91611	13.1484	16.52	17.7156	17.3895	19.395	20.8028	22.477	24.5833	26.3106	27.7703	29.3381	30.8492	34.9447	37.1257	38.7754	40.3661	41.541	45.6228	48.0968	49.3225	52.0487	53.495	53.8827	54.5126	55.3895	55.4215	54.9833	53.5102	51.3259	50.0631
49	3.83055	3.99927	3.77317	3.93572	4.28041	4.73729	4.73746	4.68942	4.81247	5.41224	5.67815	6.01338	6.30041	6.49558	6.51193	6.85668	8.79394	8.58129	11.1516	13.3591	17.2467	18.6757	19.1057	20.0044	21.6155	23.8265	25.1633	26.3381	28.0488	30.5878	33.3605	36.3252	38.02	40.139	41.3408	44.5472	48.2415	50.3809	50.7376	53.6234	56.0235	56.8654	57.0084	56.7093	55.4465	54.6576	53.3653	51.9774	49.1022
50	3.76677	3.74923	3.87923	3.83894	4.55715	4.54811	4.92979	5.21752	5.50547	5.76838	6.24495	6.43233	6.45232	6.69167	6.69462	7.75744	9.42041	11.1727	11.7378	14.2151	17.0286	18.5788	20.068	20.9427	22.5056	24.7845	25.9693	28.7178	30.1946	32.2932	34.1849	36.2918	38.6636	41.6138	43.1802	46.0782	49.1071	50.4068	54.3418	55.5508	56.4718	58.3689	58.8457	57.5842	56.593	55.4805	52.548	51.3738	49.217
51	3.74823	3.99523	4.31776	4.57241	4.77017	4.9286	4.84526	5.5612	5.61393	6.40931	6.09291	6.22723	6.47881	6.96407	7.20199	8.28061	9.97052	12.0783	14.0532	15.8018	17.5856	18.9074	19.9242	22.4801	24.0887	25.1205	27.9727	30.62	32.641	35.2834	35.544	38.7593	40.365	43.1598	46.1188	47.7577	49.6666	52.5546	54.4581	57.2004	58.0464	59.2347	58.9937	59.0569	56.7464	53.4489	53.3474	49.5845	48.515
52	3.88424	4.51567	4.74206	4.72696	4.7679	5.00732	5.22403	5.35654	6.01239	6.03916	6.05703	6.48635	7.01376	6.87446	7.48462	8.73703	10.2323	12.8209	16.2321	16.623	17.8781	18.9182	21.2797	23.2438	24.2946	26.5254	28.6709	30.8896	32.992	35.1284	37.4519	39.1177	40.9618	45.5127	47.8648	48.7216	49.7153	52.0892	55.346	57.1219	59.3663	59.9856	59.3127	59.2052	58.2435	54.9923	52.4337	50.4807	47.8985
53	4.14952	4.40699	4.84467	4.79236	5.07309	5.30567	5.35022	5.29624	5.58998	5.90448	5.98076	6.25778	6.64622	7.23235	8.25589	10.4773	9.87026	14.7161	16.9211	17.3438	18.3549	19.8629	22.2157	23.5935	25.0307	26.3592	30.0926	32.8209	33.5355	34.8517	36.7347	40.3155	42.518	45.9561	46.8643	48.423	48.9065	52.1573	55.1217	57.7652	58.252	58.8742	59.189	58.4777	58.3373	55.9367	52.9683	50.4511	48.3663
54	4.67361	4.75673	4.75731	4.75389	4.84467	4.99401	5.18092	5.37089	5.72993	5.69252	5.89596	6.27709	6.6637	8.04069	10.6421	11.4768	13.2859	16.2341	17.5621	18.3029	18.8229	20.9432	23.0919	23.6687	25.4369	28.2385	30.7988	33.0245	36.2192	35.9806	37.7305	39.342	43.4591	45.864	47.1297	48.7447	50.4302	52.4306	55.643	59.0365	60.1945	59.6668	59.1117	59.489	58.3181	55.4683	53.0824	50.4399	46.9708
55	4.67171	4.97574	4.94622	4.88308	4.82153	4.75112	4.76508	5.33463	5.97247	6.22797	6.3396	6.48899	7.1082	7.67612	9.89853	12.8085	16.2156	17.2111	18.2184	19.0163	20.5395	21.3343	22.9012	24.5043	25.1777	27.5925	29.48	33.6028	35.8947	36.0825	38.414	39.7203	42.615	46.476	48.9494	51.3499	53.1862	54.2874	56.62	57.4034	58.7809	59.4918	60.106	59.4085	58.4884	54.8683	52.3328	50.5081	47.7352
56	4.75673	4.68107	4.64428	4.62683	4.77224	4.64969	5.08672	5.20086	5.63883	5.9572	6.3447	6.63577	6.89841	8.32598	11.1158	13.5548	16.8946	18.1443	18.5801	20.1369	20.7838	21.4511	22.4294	23.5938	23.6321	26.2474	29.7497	32.8355	34.5187	37.171	38.5554	40.7357	44.9515	49.3688	51.6089	52.5125	53.9445	56.0361	58.4937	58.3318	57.8997	58.7585	58.649	57.2562	55.5224	54.2166	51.9231	49.4113	46.8004
57	4.80099	4.3874	4.48064	4.73482	4.74544	4.79622	5.15239	5.37468	5.37388	5.76702	6.05079	6.36045	6.99184	8.58888	12.4535	14.5783	16.105	18.6718	19.3358	20.4514	20.6149	22.4132	22.9723	23.4069	24.3243	27.1423	29.918	33.5543	35.7056	36.1507	38.6826	42.9473	45.7778	49.0479	51.5446	51.8029	52.2758	54.5344	57.4517	58.1377	57.9187	59.1042	56.8465	56.8865	54.2875	54.2886	50.7668	48.6479	45.7694
58	4.30677	4.39538	4.5331	5.0334	5.09524	5.29406	5.36201	5.40599	5.53827	5.79243	5.89675	6.56158	8.79125	10.5332	11.9173	11.8403	13.8568	17.1739	18.7256	19.8469	20.334	21.936	23.1604	23.8867	25.925	27.9567	32.1823	33.4693	35.4009	36.6634	39.5	42.7864	45.1064	49.7412	49.7843	50.2294	52.883	55.7332	56.9851	57.2678	58.6703	59.2129	57.9198	56.6014	56.8888	54.6675	50.7972	47.6784	46.7586
59	4.43288	4.96028	4.67661	5.14723	5.36095	5.49532	5.59406	5.48167	5.59406	5.59573	6.24521	7.34983	8.31429	9.64345	8.93884	11.6464	15.0292	16.8806	18.7366	19.1213	20.8357	22.3285	23.2981	23.9441	25.4185	28.3479	31.0082	33.377	36.0219	37.2526	40.6822	43.2213	45.463	49.2375	51.4854	52.3111	54.6404	56.4805	58.2383	58.4293	58.1697	58.1043	57.1487	56.307	55.9837	52.8243	50.3949	48.7887	45.851
60	4.68803	5.09219	5.19545	4.97288	5.38742	5.97754	5.59544	5.99509	5.77178	6.05113	6.50235	6.70018	7.30528	8.90137	11.219	13.4565	15.9884	17.7496	18.9248	19.1105	20.7555	21.9102	23.0591	24.7393	25.8295	27.5444	30.1148	34.0636	36.5493	38.2488	41.9662	44.0892	46.7193	49.8861	51.1749	53.2249	56.4805	57.6539	58.646	58.2732	58.9657	58.693	56.9095	56.7744	55.6363	52.5442	51.5218	48.7589	46.8035
61	5.03045	5.13317	5.32571	5.22722	5.41457	6.07932	6.39911	5.88736	5.86201	6.06272	6.46974	6.83569	7.52672	8.32392	10.2436	12.6315	15.6665	17.4171	16.4371	19.9066	20.5324	20.8412	22.3533	24.3816	25.4968	29.8292	30.7852	33.8627	37.5386	40.7886	42.7354	44.265	46.4613	50.0108	51.8596	53.9463	54.5855	56.4558	57.3873	58.006	58.5275	57.8449	57.8701	57.0069	53.8293	53.9322	51.8572	50.0935	48.3954
62	4.94995	5.31727	5.35707	5.36516	5.55314	6.00832	6.30089	5.86862	6.06564	6.3641	6.69621	7.02156	7.6592	8.56016	9.25857	11.9552	15.0819	16.2496	17.0741	19.236	20.198	21.1075	22.6834	23.9749	27.4638	29.1887	32.4701	34.6745	38.2122	41.2731	43.2403	45.1309	46.5622	48.0832	49.4772	52.6264	53.9698	56.6141	58.0988	59.0609	58.2162	57.8515	56.1845	55.7683	55.316	53.9653	52.4549	50.7956	49.9351
63	4.98381	5.31952	5.36139	5.55314	5.6395	5.60576	5.55643	6.03035	6.29608	6.44268	6.71736	7.04686	7.87327	9.26109	9.8132	11.684	13.099	12.7956	16.6609	18.3968	20.6114	22.63	23.0921	23.9526	25.4583	27.8181	31.9974	34.5945	37.182	40.5008	42.8013	45.9116	47.6859	49.2584	49.2203	50.9396	53.049	55.7072	58.0366	57.9131	59.3871	58.0976	56.5293	56.1627	55.6866	54.776	53.1501	50.8517	49.5004
64	4.88317	5.33016	5.40274	5.62202	5.45022	5.50258	5.49384	5.64711	6.12653	6.61614	6.93551	7.47179	9.13287	11.5915	11.6688	11.0586	13.1426	14.3558	16.7598	19.2724	20.7781	22.0877	23.9353	24.2769	26.0198	28.5942	30.324	35.2061	36.9002	40.6388	42.6457	45.5832	47.4666	48.8778	51.0985	51.0172	53.7328	55.3842	56.072	57.978	58.1545	57.837	56.7722	55.6618	55.1565	54.3308	53.3434	51.6238	49.4693
65	5.18181	5.29122	5.38614	5.55314	5.52188	5.43426	5.50394	5.61856	6.21437	6.51437	7.31414	8.09167	9.93051	10.8	11.8453	12.3446	12.2124	15.9467	17.8466	19.2031	21.193	22.6756	23.7341	23.9405	27.4279	27.5821	30.9961	34.2794	37.0602	39.4166	42.0814	44.2325	46.7433	48.7655	50.4063	50.7949	53.3938	55.7887	56.093	56.6717	57.2089	57.7916	58.8353	57.4379	54.9105	55.8274	54.6684	51.7987	49.196
66	4.8307	5.10666	5.35518	5.41683	5.55314	5.45639	5.47598	5.47598	6.17318	6.51567	7.22941	7.96916	10.3079	13.0137	13.8544	13.5743	15.1936	17.1865	17.7825	19.9153	21.6173	22.5531	23.5852	26.0815	27.3234	30.7587	32.3662	35.452	37.6249	39.0652	41.7466	43.8553	46.2565	49.3934	48.7942	51.3413	54.1988	55.5964	55.9223	57.1867	57.4689	57.69	57.6424	56.2598	55.7939	54.7988	54.205	52.8804	50.0226
67	4.53916	4.96659	5.46543	5.55314	5.50705	5.4238	5.42868	5.57043	6.00787	6.68627	8.03932	11.3103	12.3256	12.6632	11.2512	15.1103	16.3805	16.5924	18.2655	19.2835	21.4477	22.9328	23.8283	25.6441	27.9872	30.9956	34.2267	35.6179	37.5352	39.3583	41.2189	44.4572	46.1211	47.9945	49.1728	50.8714	53.4673	54.7947	55.8322	55.6301	56.7639	57.1412	57.2604	54.8371	55.2112	53.6213	52.9792	52.2602	51.1082
68	4.18533	4.76854	5.10428	5.53102	5.57945	5.26186	5.40314	5.56258	6.0383	6.63601	8.23906	10.8968	12.5343	14.2098	14.3744	13.4564	15.9234	16.795	19.0317	19.9755	21.1396	22.8618	24.407	26.3553	29.5168	30.7226	33.357	35.2667	39.0796	40.8587	42.0528	43.3872	45.1022	46.8452	49.3145	50.7049	53.0642	54.3262	56.0332	55.5856	55.1524	55.9752	55.129	55.0408	53.7623	53.0848	54.1764	54.1076	51.4686
69	4.8037	5.03618	5.11459	5.36014	5.36383	5.0533	5.48715	5.67908	6.02455	7.77435	8.7811	11.3978	13.0369	14.3253	15.118	14.1488	15.6471	16.0242	18.7375	19.8177	21.8331	22.7757	24.8166	25.5702	29.5538	31.2011	33.7585	35.2213	39.1945	40.6941	40.6223	41.9073	44.6371	47.3903	49.1144	50.9572	52.6833	51.9616	54.1771	54.8913	56.2444	54.9973	55.0941	54.2469	53.0895	54.2476	54.4647	54.5577	52.5099
70	4.80137	5.04502	5.05236	5.10112	5.14761	5.41541	5.40961	5.85806	6.25321	7.0783	8.78087	13.0334	13.9695	13.4422	13.8547	13.2878	14.4941	17.831	18.8784	19.7674	21.9907	22.9517	23.8175	25.1194	29.6927	32.2917	33.3312	36.7251	39.3539	39.2561	40.9514	42.7019	44.7374	47.2904	48.6093	51.0243	51.8019	50.9469	50.8824	52.9907	53.874	54.4776	54.618	52.8706	54.1912	54.8897	54.7324	54.7316	52.8096
71	5.02838	5.07057	5.08337	5.19898	5.05443	5.07521	5.58462	5.93763	6.30603	7.30684	8.5629	11.9094	13.1019	12.9156	11.3995	13.8956	16.643	18.0086	19.0473	20.0935	20.9594	21.9691	24.6405	26.3383	29.934	32.2193	33.9984	37.2851	38.6072	39.6212	40.8878	42.0333	44.1414	46.5632	48.6071	48.931	49.7549	50.6199	52.352	51.7801	53.84	53.7154	54.5644	54.0547	55.472	55.005	54.9902	54.3075	51.9316
72	4.86058	4.85457	5.04502	5.0533	4.89966	5.28831	5.78981	6.06002	6.34313	7.03514	8.60732	10.9363	11.5963	12.5533	12.8774	14.3104	16.7174	17.2315	18.7456	19.6376	20.8586	23.048	23.4739	25.5763	28.4617	30.0813	33.5875	35.9187	38.8182	38.9343	41.2448	42.685	44.7874	46.8125	45.2368	47.5433	49.906	49.6116	50.1452	53.7072	53.8916	53.4689	54.7036	53.4195	54.5268	54.4993	53.5711	53.3138	51.6665
73	4.20351	4.76979	4.99531	4.93127	5.05529	5.31393	5.83082	6.24707	7.10004	7.01539	8.17459	9.43875	11.778	14.9485	12.3261	14.3243	16.8159	17.7791	18.7076	19.9069	20.9973	22.586	23.0252	25.3469	27.766	30.3132	32.3619	34.5251	38.1748	38.0174	39.2698	41.1995	43.7104	43.9032	45.1148	46.5391	48.685	48.1623	49.7525	52.56	53.9413	54.455	55.4189	53.1474	54.928	53.7124	53.2046	52.5059	52.2375
74	4.69021	4.84009	5.20006	5.05295	5.2345	5.32569	5.76333	6.22591	7.02856	6.9981	8.67458	10.7872	12.7304	13.3506	13.0784	14.293	16.8704	18.2615	19.3558	20.2558	21.2082	22.9894	23.3594	26.8007	27.1944	28.1012	30.4044	32.3112	35.6455	38.2541	39.101	39.3358	41.7437	43.0179	43.6328	46.6346	47.348	49.3444	50.0503	51.5725	53.1131	53.5392	53.705	53.7475	53.8679	53.1992	54.5214	52.3231	51.9542
75	5.01102	5.01701	5.07339	5.09893	5.225	5.22625	5.71299	6.30603	6.82345	7.51064	8.76853	9.60172	10.5794	12.1364	13.8027	15.0849	17.2635	17.9705	19.2712	19.4982	21.2601	22.3929	23.6727	25.5249	27.3927	27.5944	29.0761	31.5174	33.4683	35.2504	37.3251	38.7809	39.6745	41.7513	44.0708	45.0073	46.141	48.8145	49.0848	51.7467	52.046	51.9565	53.2658	54.5173	53.9195	52.7775	54.0014	52.0171	51.576
76	4.68547	4.85694	4.98943	5.06261	5.22402	5.4632	5.77289	6.233	6.62746	6.8921	8.03675	9.25467	8.82434	11.3362	13.2115	15.3401	16.5669	18.024	18.4132	19.3356	21.0273	22.5083	23.2699	23.4874	26.2064	27.1473	29.4465	30.4288	32.0483	34.2073	37.4589	39.0529	39.6884	40.1668	43.3422	43.7557	46.5453	47.6688	47.8088	50.4067	51.6293	51.3864	52.9735	52.4799	52.6792	53.0008	52.3738	51.8659	52.1711
77	4.52722	4.46894	4.98978	5.22402	5.22728	5.60328	6.08158	6.30569	6.58524	6.89043	7.42053	8.62224	8.53354	9.90997	14.3116	15.0942	16.6968	18.0563	18.5728	19.8113	21.4822	22.2972	22.6497	24.0586	26.217	27.5628	28.7003	30.7721	32.3278	32.8494	36.1912	37.2077	38.2887	39.4734	41.8384	43.2729	45.6511	46.744	47.9468	48.7984	50.9427	49.7963	51.2766	50.8107	51.9844	52.118	51.0661	50.7571	50.7898
78	4.33274	4.71307	4.98943	5.22636	5.54832	5.65672	6.25066	6.31098	6.56458	6.79158	7.46566	7.64536	8.65143	10.8584	14.8027	16.1995	17.6996	18.1061	18.4868	19.2237	21.2988	21.8587	22.7649	23.7004	25.9229	25.5992	27.5907	29.7698	29.7382	32.0454	35.206	36.6299	37.1782	39.1997	40.7833	42.9589	45.7118	45.9645	46.7718	49.1665	50.0199	49.3208	50.0736	49.809	49.6331	51.105	50.8632	49.1522	49.8809
79	4.29628	4.81251	5.11263	5.214	5.58934	5.75419	5.93735	6.13819	6.6229	6.87159	7.50339	8.00961	9.57998	13.6896	13.454	16.0077	17.6599	17.8724	18.2311	19.5525	20.8403	22.1613	22.6428	23.4548	25.229	25.3254	26.7567	28.6637	29.8037	31.8502	33.5575	35.5774	37.7358	39.5963	40.9433	42.5006	44.6669	44.9042	46.4721	47.2295	47.9068	48.9342	46.8584	50.2748	49.2196	49.8742	49.7412	49.2641	49.7413
80	4.61466	4.91062	5.07247	5.30416	5.38756	5.73682	5.78736	6.02717	6.4304	6.70333	7.44691	8.76606	11.4765	12.4656	15.2126	16.5407	17.7819	17.9074	18.5395	19.1376	21.0724	22.2066	22.3517	23.346	23.7918	24.1993	26.4799	28.3738	29.3373	31.4559	33.7098	35.4516	36.8219	40.7602	41.8354	42.2582	43.7035	44.024	44.8376	45.3492	47.2183	47.4347	46.3019	49.4594	48.2781	49.4734	49.228	48.8203	48.1805
81	4.82482	4.83663	5.12282	5.29614	5.54241	5.64144	5.88789	6.14547	6.42593	6.76865	7.55611	9.4268	12.7616	14.8354	14.3075	15.9145	17.2399	17.614	17.9881	19.7816	21.2007	21.6067	22.3557	22.8185	23.4625	23.847	26.2496	27.9861	29.0155	32.3245	33.9569	34.4719	37.2931	39.0781	41.4567	42.6886	41.8862	43.332	43.443	44.4113	45.5887	48.1094	46.1243	47.5165	48.7685	49.3537	47.5676	49.0738	47.625
82	4.75567	4.86072	5.22307	5.22307	5.51823	5.77098	5.88789	6.12539	6.25652	6.77486	7.25705	7.82018	10.7137	13.8888	15.5067	16.2185	16.7829	16.9595	17.8176	19.1015	19.4529	19.9179	20.8106	21.9529	22.6596	23.9347	26.1206	27.5981	29.8223	32.0011	33.7717	35.805	36.6722	38.9961	39.2475	40.9696	40.6598	41.4204	42.4598	43.6568	45.8427	45.6637	46.5713	46.9718	47.8967	48.4034	47.9206	48.5244	47.4334
83	4.6229	5.11634	4.87777	5.16518	5.2938	5.62895	6.1603	6.25652	6.35496	6.82036	7.18049	7.57802	9.91025	14.3273	15.0872	15.6676	16.4398	17.534	17.3196	18.3361	18.357	19.7685	20.3582	21.2716	22.4623	23.6284	25.6228	27.0929	30.373	31.9035	33.3927	35.4752	36.9125	36.6006	37.4202	39.6391	39.8577	42.5867	42.2504	43.0968	43.8299	44.948	44.9607	45.8994	45.0875	47.5327	46.9336	47.4554	48.2893
84	4.6268	4.61815	4.8632	5.05764	5.2925	5.69628	5.69888	5.97227	6.36956	6.78768	7.01485	8.09554	9.80922	12.9288	14.7474	15.7671	16.5675	17.2575	18.0483	18.0784	18.3375	18.6496	19.9255	20.7838	21.8941	23.697	25.0919	27.0679	29.1767	31.6389	33.5245	33.8934	34.7542	36.0475	37.6585	37.6372	39.6051	41.6301	41.7438	41.3685	42.717	43.1178	44.0453	45.3266	44.5337	45.7939	44.8893	45.0647	47.5744
85	4.33275	4.61982	4.565	4.8038	5.17547	5.45544	5.74397	6.16422	6.35476	6.76842	6.96482	8.06173	8.48173	11.4938	13.1622	15.4414	16.0495	17.6214	17.5241	17.8892	18.2067	19.5954	19.5713	20.4123	21.4044	22.9664	24.7287	27.2603	29.3683	31.1795	32.4881	32.4325	32.7703	34.9522	35.9049	36.9385	38.3828	40.2667	41.089	41.4512	41.3884	43.3215	43.992	44.6093	45.5457	44.3937	43.9898	44.7356	46.1866
86	4.54849	4.61674	4.67021	4.91742	4.90727	5.41506	5.58351	6.23126	6.20802	6.46382	7.08231	7.03126	9.17278	9.72387	13.969	14.9948	16.644	16.77	17.2848	17.6027	18.9453	18.4135	19.9418	20.5339	21.4939	22.3828	24.387	26.137	27.8783	29.9553	30.7496	31.427	31.8116	34.1005	35.2383	36.6455	38.6971	38.978	40.0319	40.4268	41.2604	43.4338	42.7611	44.2636	44.5364	43.777	43.0999	44.0644	45.5502
87	4.39294	4.45315	4.49923	4.71352	4.71074	5.29394	5.86142	6.13744	6.35266	6.54834	6.48768	7.1546	9.00556	12.7675	13.6837	15.0881	15.8064	15.7764	17.0992	17.7871	18.1376	18.5755	20.3402	20.1926	20.6486	21.9135	24.433	25.3489	28.1895	29.4895	29.5667	30.7862	30.8356	33.339	33.8051	34.8121	37.8321	38.625	39.3868	40.1009	41.2562	41.7303	43.1974	44.0288	43.6117	43.4702	42.7709	43.255	44.0714
88	4.09489	4.24188	4.21546	4.56069	4.71074	5.50164	5.96062	6.11449	6.35266	6.43533	7.90323	8.11018	8.08397	9.74429	13.3163	13.6194	14.044	16.177	16.8713	17.0354	18.6833	19.4067	20.0133	20.2264	21.2194	23.059	24.4969	25.1108	27.4708	28.3233	29.4029	29.5333	30.9103	32.2331	33.2107	34.2644	35.0739	37.3967	38.4828	40.171	40.2998	41.4379	42.9655	44.2207	43.3514	43.0107	42.8923	43.4313	42.7487
89	4.23493	4.22942	4.25127	4.40326	4.71398	5.28311	5.75618	5.98377	6.17682	6.24762	6.50013	7.84898	9.11337	10.0712	11.1389	11.7037	13.4532	15.6947	16.7162	17.4162	17.3841	19.2167	19.8469	19.9709	21.5416	23.388	24.6613	25.4904	26.0098	27.5203	27.4926	28.6185	29.3014	31.6638	32.4874	33.7975	34.1628	35.4851	37.3986	37.928	38.7651	40.4054	42.2152	41.4093	42.6685	42.3921	42.2054	41.866	42.5431
90	4.08471	4.01166	4.24285	4.31216	4.63995	5.20953	5.68913	5.7624	5.84999	6.35513	6.50665	6.64997	7.06294	7.49897	8.53481	9.85552	14.9839	15.9726	16.5868	16.8333	17.8562	18.9694	19.4126	20.6381	22.6868	23.3859	24.3598	25.2415	25.8219	26.3458	27.0586	28.4366	29.5175	31.6152	32.1288	34.0513	34.5849	34.2849	35.8137	38.4513	37.838	38.9944	40.7789	41.0151	41.0542	40.7407	41.021	41.5653	41.8725
91	4.13159	4.12775	4.17834	4.26458	4.75699	5.3091	5.28824	5.26156	5.4213	5.97791	6.3811	6.79269	6.84436	7.16371	7.39188	8.36674	12.4766	15.1764	16.4458	16.7153	17.3736	18.4648	18.9875	20.8753	22.8747	23.4919	23.8685	24.7271	25.4338	26.2785	26.2556	27.1217	28.7272	31.2295	31.5089	32.5459	33.0087	34.4255	35.0118	36.8817	37.2778	37.6217	38.7635	39.8231	40.3229	40.3112	39.4494	40.1969	40.7165
92	4.1064	4.17269	4.03289	4.38656	4.61566	5.00362	4.86409	5.05182	5.38034	5.78182	6.17382	6.46609	6.80709	7.08548	7.39837	8.70905	10.4309	15.0514	16.159	16.8464	17.405	18.9807	19.5802	21.226	22.3702	22.7723	23.3108	24.1287	25.2924	25.6945	25.7815	25.6046	27.8077	29.4167	30.5196	31.6288	31.898	33.4531	35.7411	36.1588	35.3162	36.3098	38.2685	38.8647	39.5286	40.211	38.9454	39.38	39.2894
93	4.02914	4.02076	4.17769	4.41878	4.45276	4.74818	4.9829	5.23809	5.43464	5.78041	6.12729	6.41024	6.57473	6.91826	7.28655	7.92074	11.6981	14.2411	15.9546	16.5793	17.0424	17.893	19.4995	20.7095	21.8158	22.4527	23.3001	23.8702	24.6133	25.2085	25.793	25.8375	27.234	28.3479	30.8287	30.5847	31.2784	32.1372	35.0394	34.9398	34.2922	34.2954	37.9629	38.5571	38.8171	39.1094	38.5126	38.0283	39.0938
94	4.03551	4.02897	4.08471	4.25438	4.27927	4.74825	4.86605	5.20252	5.65822	5.74224	5.84409	6.30167	6.46545	6.8025	7.1768	8.51738	11.012	13.2619	15.3038	16.218	17.0227	17.0764	18.5585	20.0028	20.3965	21.6651	22.3569	23.9255	23.5699	24.9235	25.5992	25.6426	26.8346	28.2546	29.7617	29.4822	30.1854	31.8602	34.8465	33.8675	33.9298	35.0761	37.0014	38.4942	37.9294	37.9661	37.3205	38.1979	38.9446
95	3.81701	3.94762	4.18001	4.24252	4.49248	4.59236	4.87636	5.64214	5.76199	5.5942	5.80319	6.24901	6.26633	6.33075	7.8988	7.69778	11.0799	11.8148	13.273	15.5419	16.2231	16.9023	17.7593	19.6875	20.3376	20.3046	21.7552	22.6784	22.8589	24.4551	25.3072	26.3962	26.1878	27.6263	28.504	28.2782	29.6649	31.6077	33.7055	33.5135	32.8787	34.2298	36.2079	36.4154	37.3523	37.2484	36.9273	38.4678	38.4311
96	3.80896	3.8162	4.17807	4.4116	4.68726	4.64969	5.30189	5.4583	5.49908	5.64214	5.79445	6.13804	5.97851	6.26944	7.03145	9.50297	10.0921	10.2878	12.702	14.8368	15.3433	15.6395	17.2125	18.3779	19.1701	19.8658	20.8744	21.3147	23.0619	24.8033	25.007	25.7859	26.4173	27.0893	27.2724	28.0135	28.6152	30.9093	31.9799	31.7099	31.9049	33.5071	34.6092	35.5164	36.3291	35.7504	36.2459	37.2934	36.8251
97	3.63914	4.02145	4.24231	4.57451	4.64999	4.96164	5.1968	5.39378	5.54586	5.64026	5.72392	5.75909	6.00265	6.32662	7.36096	10.8941	8.90724	10.171	12.099	13.7127	14.4644	16.0003	16.1239	17.047	18.6542	19.3349	20.8835	21.4815	23.576	24.166	24.7016	25.0791	25.6136	26.8568	26.6467	26.9636	28.7832	29.9824	30.3969	31.4801	31.141	33.0052	32.5169	34.197	35.4572	34.7434	35.15	36.5629	36.0583
98	3.9115	4.12828	4.41105	4.5557	4.6912	5.08157	5.0752	5.27444	5.4941	5.62774	5.65655	5.7988	5.969	6.58045	8.18614	8.07034	9.27928	8.66174	12.7381	13.7334	14.1243	14.3123	16.4564	16.7146	17.5101	19.9381	20.9449	22.4831	22.748	24.4177	24.5311	25.52	25.5169	25.7023	25.5116	26.5136	28.3753	28.7674	28.9608	29.8945	30.7788	31.7138	32.9067	33.5591	34.3752	34.1019	34.52	35.31	34.6656
99	4.02145	4.24188	4.42436	4.60158	4.65089	4.8601	4.80464	5.0839	5.44239	5.62096	5.60997	5.77438	5.9309	7.26185	7.11157	7.38728	8.60922	9.36337	12.5103	13.7984	13.6653	14.641	15.386	15.741	16.5399	19.8002	20.7087	22.5701	23.781	23.2301	23.8697	24.6398	24.8773	24.7059	24.9849	26.4907	28.1489	27.4693	28.3351	29.1643	30.6624	30.4504	31.6012	33.4289	33.2145	34.4719	33.9213	33.7064	34.3062
100	4.24209	4.24188	4.32307	4.46934	4.52356	4.59564	4.78327	5.21526	5.42749	5.58599	5.60347	5.85226	6.38647	6.6675	6.56806	7.46761	8.97514	9.75838	12.2326	13.5415	13.9102	14.1788	14.6922	15.4999	18.2359	18.9471	20.9946	21.7189	22.786	22.6072	22.7417	23.9876	23.3692	24.1984	24.4978	25.953	27.377	27.0977	28.6864	28.3163	29.1446	29.4852	30.4167	31.5456	32.6287	32.8531	33.4095	32.5976	33.2513
101	4.17807	4.24188	4.24209	4.17947	4.51015	4.54057	4.87707	5.18342	5.42602	5.53827	5.77731	5.87664	6.27926	6.61675	7.08344	7.12702	8.81848	10.9369	12.6989	13.26	13.7173	13.9319	15.1522	16.2852	18.4486	18.7004	19.9358	20.7211	21.6633	22.5784	22.4021	22.6872	22.9435	23.9911	24.2879	25.3063	25.1532	26.8299	27.4723	27.1766	27.6492	28.8392	29.4381	30.8558	31.8575	31.3496	31.6119	31.2616	32.0705
102	4.12093	4.12878	4.1789	4.37723	4.52764	4.8436	4.96065	5.36069	5.47777	5.53385	5.88561	5.89976	6.18178	6.30086	6.76621	6.67891	7.87952	10.456	12.0309	12.2811	13.5808	13.9096	14.5429	16.5245	16.9299	18.0736	19.5903	19.9651	20.4313	21.3672	22.2024	22.8586	22.628	23.3416	23.7262	24.3302	24.6637	25.0479	26.471	26.7162	26.8223	27.6327	29.2755	29.6504	30.7332	30.0013	29.7844	29.5812	30.604
103	4.15346	4.12882	4.18325	4.35902	4.55611	4.8732	5.05173	5.24176	5.42603	5.8039	5.92738	5.97198	5.9865	6.11188	6.35879	7.2209	7.28697	10.5377	12.675	12.2838	12.6925	14.0209	14.6297	15.1675	16.0771	16.8712	18.7169	19.6116	20.1711	21.0174	21.5957	21.183	21.9985	22.5342	22.8544	24.0691	24.0771	24.6825	25.959	25.6278	26.2155	26.4769	27.618	28.7755	29.726	28.0569	28.7745	29.2612	30.5132
104	3.88013	3.96665	4.29864	4.48337	4.65062	4.74459	5.11208	5.37087	5.37903	5.68113	5.81044	5.95393	5.9865	5.94208	6.06125	6.88977	7.243	9.84779	12.0782	12.2035	12.5142	12.9101	13.8904	14.7241	16.0982	17.1674	18.6272	18.8771	19.7781	20.1538	21.1107	20.4304	20.6822	21.1515	22.1959	23.4449	23.0305	24.5569	25.3424	24.6838	24.648	24.9603	26.506	26.5278	28.0471	27.7024	27.8114	27.6594	29.5736
105	3.64327	3.84061	4.17891	4.4914	4.52551	4.54057	4.97073	5.37623	5.32777	5.6092	5.90544	5.87697	5.9606	5.89013	5.98651	6.96482	8.66215	11.0538	12.0874	12.0875	12.6664	12.9636	13.5386	14.1395	15.2445	16.3822	18.5237	18.816	19.1262	19.2127	19.2982	20.2191	20.4514	21.1437	21.7851	22.3532	23.1651	25.4257	24.5785	24.1685	25.0169	24.8266	24.9524	25.5396	26.8355	25.9481	26.8097	26.6086	27.7844
106	3.40192	3.80264	4.07794	4.22783	4.19704	4.52683	4.98073	4.8557	5.24149	5.58939	5.73686	5.65628	5.83902	5.8744	6.03784	6.99199	10.2794	10.3667	11.3046	12.1036	12.5951	12.7492	13.0477	13.7643	14.8533	16.7766	18.106	18.4001	18.7471	19.0315	19.0512	19.4317	19.9136	20.4808	20.8438	21.9165	22.3904	24.2582	24.8887	23.2807	23.6625	24.3151	24.1075	24.9935	25.8813	24.921	26.3335	25.3278	26.3923
107	3.51043	3.68399	4.13195	4.14228	4.26607	4.40169	4.51943	4.78832	5.28959	5.59033	5.67283	5.68009	5.78899	5.78899	5.89184	7.70609	8.45225	9.15435	10.753	10.987	11.5483	12.6649	12.99	13.4988	14.6624	16.1565	17.4155	18.1941	18.5572	18.4353	18.9389	18.9655	19.4128	20.2951	20.7096	22.0035	22.0617	23.013	21.9032	22.0509	22.3285	22.6848	24.0034	24.5194	24.8148	24.9349	25.5433	25.1391	25.2963
108	3.45257	3.78371	4.12733	3.91387	4.09207	4.28757	4.37503	4.85459	5.11294	5.34324	5.65199	5.66863	5.64893	5.67585	5.95809	6.35908	6.14434	7.3488	8.02131	9.16865	10.2755	10.4718	13.4268	13.4632	13.8023	14.7429	15.4848	16.4945	18.134	18.7002	18.8338	18.8665	19.0732	19.3063	19.9279	21.6964	21.5726	21.6229	21.5807	21.4632	21.9521	22.5512	23.3425	23.7179	23.5616	25.2739	25.1176	24.268	24.706
109	3.68482	3.80356	3.79431	3.80337	3.99185	4.28786	4.41956	4.58104	4.93523	5.22059	5.43551	5.40621	5.64573	5.46761	5.61501	5.85519	5.9846	6.6302	6.93442	7.45555	9.31301	11.2254	12.9361	13.3029	13.1128	14.8398	15.1466	16.3005	18.2097	18.3105	18.2784	18.476	19.0489	19.183	19.7371	21.1949	21.0324	20.8137	21.5307	21.2586	21.3884	21.941	22.6529	23.1407	23.1705	24.5596	23.7379	23.7501	24.866
110	3.59438	3.80318	3.79011	3.85874	4.15561	4.264	4.47444	4.57306	4.91821	5.29766	5.06309	5.3725	5.60844	5.63121	5.60115	5.65027	5.90838	6.15546	6.72607	7.52674	9.9007	9.16414	12.2952	13.0417	13.1987	14.3497	16.3234	16.5162	17.667	18.0019	17.9976	18.1484	18.9794	18.8951	19.4318	19.956	20.5899	20.2083	20.4584	20.4312	21.9249	21.8387	22.3962	22.5926	23.5738	23.4199	22.44	24.0545	24.1298
111	3.57394	3.6235	3.6249	3.75903	4.0848	4.17205	4.51425	4.66665	4.91818	4.91661	5.04312	5.24277	5.37746	5.46903	5.57204	6.19668	6.24638	6.4051	6.71208	7.58845	9.48039	8.78992	9.39051	12.2383	13.1218	15.2897	16.1314	16.7818	17.4557	18.0382	17.6591	17.5046	18.7479	18.7446	19.0077	19.3763	19.6414	20.2045	19.6075	20.4371	20.6431	21.8583	22.3188	22.4909	23.6671	22.5323	21.6142	23.4389	23.5794
112	3.35704	3.54911	3.6876	3.7726	4.06722	4.2515	4.34992	4.51321	4.67843	4.87177	5.03734	5.07069	5.41223	5.34933	5.54122	5.57833	5.76843	6.55893	6.28793	7.42884	7.11529	8.82621	9.32635	12.4739	13.997	14.9955	14.7689	17.0274	17.1233	17.366	16.9354	17.3636	18.1486	18.6655	18.776	18.8155	19.0711	19.1597	19.4019	19.9119	19.8658	21.136	22.1882	23.0295	22.557	21.5765	20.7425	22.1526	22.9477
113	3.34556	3.55471	3.55289	3.76156	3.96273	4.19524	4.33507	4.42665	4.56377	4.82958	5.06095	5.40621	5.25821	5.37617	5.48518	5.5598	5.66713	5.98164	6.22489	6.3345	6.49989	8.20304	8.3862	12.7286	13.484	14.3008	14.4618	17.0631	17.0235	16.5356	16.708	17.2609	17.5963	18.4174	18.5775	18.569	18.6492	19.0241	19.1323	19.7899	19.5525	20.6102	21.4214	21.2854	21.6153	21.1816	20.5933	21.8112	22.3786
114	3.47542	3.47542	3.56151	3.88038	4.09547	4.10594	4.34534	4.40094	4.61502	4.78971	5.04319	5.44617	5.14464	5.32566	5.50615	5.50569	5.60192	5.90644	6.0474	6.274	6.58003	6.99488	9.10228	12.1782	13.0637	13.9702	15.1782	16.3395	15.691	15.1052	15.5085	15.8604	16.1577	17.9079	17.8608	18.2757	18.4384	18.629	18.8963	19.1911	19.2946	20.3663	20.4802	20.3489	20.5087	20.0662	20.2521	21.2405	21.4602
115	3.55459	3.46147	3.69255	3.87954	4.03863	4.10661	4.24492	4.28496	4.51366	4.72039	5.01236	5.02762	5.06151	5.27368	5.50615	5.4572	5.59332	6.04741	6.14253	6.17601	6.45974	6.45855	7.29288	11.2313	12.5504	13.7456	14.8026	16.083	15.8013	14.5029	15.6378	14.8907	15.921	17.2534	17.4713	17.8065	18.3896	18.4711	18.7915	18.6979	19.3273	19.8345	20.2223	20.6192	20.5559	19.6973	20.062	20.7249	21.2535
116	3.55459	3.48813	3.60208	3.77844	3.82315	3.97	4.04144	4.28043	4.47259	4.71374	4.87797	4.88696	4.91938	5.15447	5.28473	5.55288	5.62502	5.7813	5.75703	5.95071	6.10235	6.41745	6.95491	9.15626	12.3177	12.8065	14.0441	13.8688	14.8165	14.4811	13.6512	13.7708	15.7175	15.9395	17.4992	17.3498	17.649	17.7325	18.058	18.5302	19.3457	19.4441	19.4996	19.671	19.6391	19.6261	19.7289	19.8218	20.8089
117	3.47542	3.48218	3.62728	3.77007	3.76627	3.91927	4.10619	4.32679	4.56733	4.69491	4.88696	4.89119	4.91739	5.10399	5.25874	5.50518	5.69226	5.66773	5.75341	5.86659	5.95622	6.28146	6.48694	7.70137	10.6318	11.6627	12.7854	12.7674	13.2081	14.0592	12.6831	14.2312	15.4596	16.692	16.8954	17.4544	18.1471	17.476	17.6493	18.361	18.7231	18.3071	19.1283	19.2781	19.0818	19.2509	19.3239	19.681	19.7605
118	3.29686	3.48669	3.76559	3.69141	3.76167	4.0094	4.10677	4.31844	4.51869	4.73124	4.87657	4.88634	4.86982	4.97149	5.04169	5.50632	5.49986	5.57363	5.61182	5.78678	5.85049	6.03447	6.37599	7.5766	9.80049	11.2937	11.8134	11.8633	13.2238	12.6297	13.2309	14.4429	15.8691	16.2552	17.1437	17.1177	17.7987	17.521	17.3566	18.2103	18.104	18.2763	18.5065	18.9675	18.7659	18.8289	19.1632	19.2221	19.5904
119	3.28323	3.56056	3.62635	3.65997	3.76559	3.90195	4.25051	4.4259	4.52551	4.53108	4.69204	4.63928	4.88815	4.88696	5.17322	5.39419	5.31272	5.40232	5.66064	5.74785	5.84475	5.99736	6.27308	6.45742	8.99393	9.58233	10.4119	11.4826	13.0249	11.6872	12.9727	13.8454	15.072	15.9698	16.5673	17.6185	17.3793	17.1292	17.4126	17.8304	18.0083	18.1587	18.1997	18.4695	18.6438	18.5146	18.6323	18.9029	19.4382
[truncated: 71 more columns]
