# Supplementary material for: Unexpected long-term variations of Saturn’s ring current revealed by energetic neutral atom imaging
Source: Research Square preprint supplement (doi:10.21203/rs.3.rs-3271171/v1), 2023-09-18
Supplement: Supplementary file 20 [file cc1239a4699264a024b28443.xlsx]

## Sheet: Fig. 1a_2013
	0	1	2	3	4	5	6	7	8	9	10	11	12	13	14	15	16	17	18	19	20	21	22	23	24	25	26	27	28	29	30	31	32	33	34	35	36	37	38	39	40	41	42	43	44	45	46	47	48
0	1.83368	1.84211	2.03263	2.02099	1.99368	2.05368	2.18401	2.2028	2.26725	2.21416	2.11769	2.0128	1.95983	1.9473	1.99652	2.05115	2.1802	2.27799	2.3684	2.33722	2.3504	2.34986	2.5104	2.51109	2.63707	2.69545	2.76428	2.73545	2.8004	2.70121	2.83337	2.99598	3.07102	3.07836	3.08262	2.98902	3.08193	3.08241	3.19009	3.20299	3.19009	3.20383	3.13327	3.19188	3.11099	3.19713	3.22329	3.2897	3.2897
1	1.86891	1.87084	2.03304	1.95411	1.99276	2.01367	2.13268	2.22098	2.2438	2.18241	2.16191	2.1204	2.04893	1.95561	2.05065	2.11441	2.13283	2.31441	2.33151	2.43141	2.48628	2.49618	2.52542	2.64336	2.7411	2.75796	2.79611	2.86581	2.82792	2.86215	2.94872	2.96726	3.11749	3.1322	3.12661	3.08226	3.13462	3.10515	3.14421	3.20299	3.23266	3.19445	3.26188	3.25758	3.23527	3.27722	3.2897	3.36076	3.34134
2	1.88127	1.85803	2.05297	2.05297	2.03752	1.99552	1.88597	2.1264	2.1215	2.18097	2.18159	2.21416	2.21416	2.2358	2.01387	2.21076	2.33151	2.33124	2.36614	2.39229	2.51781	2.6063	2.64336	2.67511	2.76619	2.92867	2.98418	2.92773	2.92761	2.91405	3.07318	3.05206	3.10824	3.15784	3.1624	3.16936	3.15384	3.17669	3.13462	3.22978	3.34555	3.31322	3.23014	3.38075	3.38316	3.24545	3.35998	3.38556	3.38696
3	1.83479	1.86697	1.95755	2.03393	1.93778	1.90552	1.87879	2.05237	2.11147	2.18088	2.15236	2.12136	2.27058	2.4488	2.26975	2.40175	2.44398	2.33139	2.40504	2.44882	2.51077	2.57513	2.6579	2.69147	2.8705	2.93508	2.99759	3.01975	2.99759	2.99839	3.03695	3.05667	3.13648	3.1452	3.24607	3.20889	3.18079	3.1905	3.1905	3.22164	3.3794	3.38374	3.38556	3.40144	3.48181	3.40434	3.40045	3.45271	3.45215
4	1.87225	1.89228	1.8424	1.9469	2.03482	2.01716	1.8688	2.05297	2.19482	2.23844	2.28023	2.24882	2.23445	2.44398	2.44023	2.44753	2.51121	2.59006	2.4592	2.58459	2.58184	2.6536	2.71778	2.71778	2.80312	2.93508	2.97576	3.00389	3.06608	3.06441	3.13934	3.13349	3.16647	3.1837	3.24442	3.35045	3.26471	3.27785	3.22818	3.23559	3.34137	3.38605	3.42466	3.49186	3.48832	3.57409	3.48388	3.50413	3.4939
5	1.84212	1.88238	2.05297	1.92155	2.13583	2.11593	2.03523	1.84212	2.19968	2.22569	2.32806	2.36266	2.36266	2.27048	2.50693	2.45901	2.56643	2.61657	2.65799	2.69892	2.6145	2.67511	2.7505	2.77632	2.80312	2.87182	2.99759	3.08044	3.13155	3.13155	3.13155	3.17658	3.22236	3.22978	3.23011	3.24764	3.36255	3.38556	3.275	3.3491	3.31196	3.38611	3.57409	3.58749	3.58626	3.57409	3.53011	3.62665	3.62207
6	1.82909	1.88037	2.02245	2.05297	2.17035	2.23753	2.16616	2.02848	2.03742	2.01289	2.16202	2.33466	2.39004	2.4583	2.47368	2.5873	2.61657	2.62606	2.68043	2.76689	2.77708	2.67511	2.78128	2.78178	2.86288	2.95666	3.01877	2.99971	3.13155	3.1771	3.19151	3.19323	3.20763	3.27719	3.37436	3.38038	3.34828	3.39251	3.38556	3.38581	3.37985	3.40045	3.57087	3.5987	3.65496	3.5989	3.64988	3.71698	3.69479
7	1.84256	1.95271	2.02085	1.97861	2.11087	2.27722	2.27119	2.20792	2.03574	2.07914	2.24987	2.43137	2.44689	2.53471	2.50087	2.51465	2.59631	2.5809	2.65516	2.76689	2.78149	2.77714	2.7765	2.8127	2.82082	2.84356	2.99759	3.13155	3.13155	3.18376	3.20837	3.31905	3.24764	3.24877	3.42029	3.42619	3.46513	3.41991	3.37977	3.45456	3.44682	3.49756	3.58127	3.60134	3.7724	3.68239	3.72839	3.78398	3.86706
8	1.86415	1.97857	2.0924	2.1264	2.13167	2.2655	2.30264	2.27722	2.23753	2.18768	2.17617	2.29418	2.43489	2.50593	2.58184	2.63552	2.61657	2.61657	2.66023	2.7277	2.7793	2.7819	2.81204	2.84337	2.85973	2.92371	3.05202	3.13155	3.17351	3.25675	3.22978	3.33952	3.29453	3.40019	3.41643	3.5049	3.61603	3.51877	3.60485	3.57778	3.59151	3.56566	3.77876	3.6849	3.87573	3.81074	3.77636	3.89397	3.98066
9	1.8828	1.97647	2.1264	2.1264	2.27027	2.19995	2.29384	2.27722	2.27722	2.32333	2.29135	2.33249	2.44104	2.50246	2.538	2.61526	2.68042	2.67511	2.65075	2.75219	2.84338	2.81341	2.84413	2.90204	2.96952	2.9959	2.99909	3.13155	3.18314	3.22679	3.27212	3.26131	3.36919	3.41583	3.49953	3.59138	3.55713	3.69454	3.65675	3.79344	3.66146	3.61963	3.79567	3.80662	4.01523	4.05169	4.02872	3.99423	4.8722
10	2.10387	2.11134	2.14426	2.18609	2.21188	2.33373	2.39883	2.33115	2.39659	2.44689	2.44178	2.35758	2.44787	2.47806	2.50626	2.59711	2.72022	2.74705	2.71411	2.74631	2.8441	2.88442	2.88043	2.91275	3.07381	3.17024	3.16016	3.18978	3.24155	3.28862	3.28591	3.35888	3.48889	3.41617	3.41618	3.63419	3.87129	3.86154	3.80962	3.91026	3.90202	3.90864	3.9795	4.11398	4.09076	4.08916	4.03696	4.14391	5.14457
11	1.9986	2.11201	2.14426	2.18097	2.27225	2.3048	2.34164	2.38488	2.45544	2.44689	2.4583	2.45908	2.57876	2.58183	2.58334	2.62808	2.69571	2.78128	2.78168	2.87982	2.87127	2.91624	2.88001	3.07288	3.09049	3.18481	3.27178	3.36773	3.38011	3.35644	3.4261	3.5011	3.4627	3.56088	3.56363	3.7615	3.89858	3.91744	4.02584	4.03271	3.9795	4.12181	4.1797	4.36032	4.34593	4.23121	4.17875	4.20468	4.95282
12	2.04016	2.12822	2.17304	2.22284	2.33667	2.35403	2.38896	2.44689	2.48588	2.52627	2.57485	2.5816	2.56314	2.60487	2.72376	2.69495	2.78128	2.81967	2.85302	2.93062	2.96139	3.01596	2.94743	3.01152	2.99164	3.28948	3.21648	3.34786	3.36602	3.52448	3.57148	3.59822	3.5253	3.59266	3.63962	3.72885	3.97963	3.94189	4.02544	4.09972	4.12727	4.15842	4.24932	4.34074	4.74425	4.55527	4.6644	4.45494	4.78517
13	2.12715	2.14426	2.14426	2.29012	2.31837	2.33923	2.4176	2.4583	2.49607	2.58267	2.49198	2.58267	2.65278	2.68198	2.82812	2.74046	2.88051	2.9163	2.99289	3.05245	2.99927	3.14031	3.09077	3.18352	3.14104	3.26851	3.23373	3.36091	3.46147	3.5253	3.72864	3.72839	3.75405	3.81248	3.76906	3.81278	3.94904	4.00261	4.01804	4.15009	4.1812	4.20238	4.28873	4.51425	4.55189	4.77267	5.26657	5.6589	5.78699
14	2.13235	2.18558	2.22283	2.2471	2.3171	2.33995	2.38577	2.46841	2.58103	2.50185	2.57578	2.65278	2.65278	2.72415	2.80317	2.87178	2.99265	2.95741	3.19073	3.23504	3.22283	3.23242	3.21871	3.22283	3.25372	3.22375	3.32394	3.29556	3.44913	3.7009	3.78447	3.84956	3.96541	4.01198	3.99096	3.99455	4.04932	4.08698	4.12058	4.17268	4.25188	4.25523	4.33066	4.62429	4.72078	5.3091	6.00417	7.7813	7.27433
15	2.24016	2.26362	2.26383	2.32134	2.32178	2.33956	2.46183	2.53036	2.6146	2.65278	2.65278	2.65278	2.69704	2.77892	2.74618	2.93518	2.97301	2.96672	3.24317	3.27657	3.36558	3.39489	3.29517	3.22331	3.22333	3.22726	3.41829	3.44609	3.66132	3.72928	3.86571	3.89671	4.0834	4.12145	4.24097	4.25578	4.22528	4.26293	4.29206	4.35724	4.32236	4.38482	4.5792	4.69396	4.90001	5.91771	6.59622	7.99223	8.59738
16	2.26362	2.33559	2.33179	2.31929	2.29534	2.34104	2.48109	2.5259	2.58222	2.63468	2.65717	2.67591	2.8915	2.97998	2.99308	2.98592	3.11	3.16369	3.19854	3.30415	3.34355	3.39223	3.40975	3.39302	3.39709	3.41359	3.50704	3.61576	3.77368	3.81837	3.82825	3.86942	4.05319	4.23114	4.24703	4.25342	4.33824	4.54172	4.77057	4.94763	4.77256	4.56415	4.58154	4.72614	5.71431	6.75622	7.24095	8.01279	8.34189
17	2.13528	2.26383	2.36786	2.33923	2.33991	2.33923	2.48856	2.61111	2.61529	2.58457	2.71778	2.80708	2.82734	2.99757	3.13778	3.08444	3.07686	3.20404	3.30968	3.35579	3.28907	3.3454	3.41725	3.47732	3.61576	3.61576	3.63299	3.78501	3.81807	3.90119	3.99287	3.99548	4.12443	4.33787	4.37774	4.35713	4.5198	4.69864	6.14994	5.55019	5.80652	5.25028	5.24394	5.30318	6.43584	7.30139	7.65079	8.25792	8.4848
18	2.23379	2.26333	2.23753	2.33179	2.39037	2.48028	2.61741	2.60358	2.69	2.64576	2.61382	2.77931	2.95066	3.08573	3.13884	3.1375	3.19874	3.19948	3.34392	3.35515	3.37965	3.37862	3.46441	3.57196	3.6534	3.67483	3.82556	3.87774	3.9687	3.93206	4.06974	4.09772	4.2642	4.46872	4.83976	4.91103	4.68915	4.97945	5.92673	6.23112	6.64423	6.42773	6.58439	7.51204	8.23089	8.14524	9.56337	9.72524	9.61614
19	2.14426	2.33179	2.26362	2.30619	2.33923	2.41444	2.58767	2.62915	2.76209	2.75666	2.70916	2.76768	2.8082	3.00294	3.11409	3.16245	3.19944	3.35629	3.36422	3.40045	3.55022	3.65592	3.67034	3.69573	3.70457	3.72882	3.78941	4.01327	4.01784	4.01762	4.08725	4.14284	4.35154	4.54383	5.035	5.17754	5.14362	5.18078	5.61257	6.18259	6.81251	7.30175	8.17396	8.39836	9.36225	9.25082	9.48693	9.47343	9.91701
20	2.28011	2.31138	2.2814	2.26819	2.33923	2.37469	2.50639	2.70835	2.73266	2.8626	2.83422	2.92319	2.90684	2.88873	3.0279	3.14792	3.28421	3.36563	3.40045	3.59926	3.65624	3.76648	3.72077	3.79815	3.88608	3.82797	3.99193	4.09939	4.09498	4.18308	4.2394	4.26475	4.47719	5.01562	5.08758	5.14627	5.27784	5.61075	5.75168	6.32114	6.48823	7.20218	7.72469	9.72962	10.4579	10.6719	10.6638	10.6248	9.94085
21	2.33179	2.32388	2.33179	2.25587	2.33179	2.33923	2.46845	2.70835	2.75788	2.98664	3.01322	3.01545	3.0691	3.15309	3.19246	3.17231	3.22594	3.39552	3.498	3.65081	3.74827	3.79002	3.86118	4.02061	4.17362	3.98074	4.11374	4.21684	4.36616	4.33829	4.37355	4.43636	4.56863	5.26492	5.9127	6.02689	5.72701	5.85521	6.21538	6.86898	7.25926	8.00998	8.17553	9.3647	10.7572	11.4062	11.2652	11.1279	11.5662
22	2.26362	2.28557	2.33179	2.33179	2.33179	2.3913	2.42971	2.64253	2.76495	3.04522	3.07945	3.14384	3.19874	3.20098	3.30632	3.39552	3.40045	3.42718	3.52352	3.70457	3.81236	3.86608	3.9544	4.02058	4.33668	4.32423	4.25676	4.33399	4.52351	4.50904	4.57418	4.65469	4.68685	5.22435	6.16588	5.79022	6.05632	6.82956	7.80133	7.84741	7.402	8.31015	7.94754	9.29756	11.0059	11.9563	11.9776	12.2387	12.2049
23	2.33923	2.32642	2.31708	2.32865	2.34303	2.42064	2.45529	2.60281	2.78797	2.87186	3.00548	3.2749	3.30283	3.30804	3.35676	3.39552	3.39552	3.46147	3.50324	3.66536	3.78971	3.97241	4.13347	4.13273	4.2912	4.36232	4.39154	4.55206	4.65969	4.6575	4.64093	4.99005	4.78558	5.18308	6.11227	7.24506	6.64684	7.37057	8.36233	8.25855	8.54485	9.35943	9.10784	10.2285	11.2431	11.7928	12.8364	12.773	12.7995
24	2.35274	2.38469	2.36057	2.38896	2.39943	2.44582	2.51031	2.67574	2.77058	2.91496	2.99164	3.26397	3.32671	3.35579	3.34222	3.35604	3.43594	3.46147	3.57359	3.61576	3.78971	4.02073	4.20846	4.34828	4.33267	4.50328	4.50544	4.55766	4.88941	4.96369	5.0456	5.16765	5.27861	5.6793	5.62448	6.71523	7.20296	8.68443	8.68834	8.68404	8.20985	8.88135	9.35056	9.9896	12.1018	12.6337	13.1578	13.2858	13.1994
25	2.35594	2.45037	2.50593	2.47647	2.46192	2.57457	2.5592	2.55604	2.78809	2.87681	2.97126	3.19676	3.31809	3.33253	3.35629	3.39413	3.55722	3.56845	3.65339	3.75836	3.86702	4.09531	4.15043	4.33183	4.26925	4.72001	4.71504	4.80966	5.03218	5.07307	5.22516	5.239	5.39065	6.1285	6.36591	6.95488	7.44256	8.60929	8.94301	9.72706	9.28143	10.5598	9.78491	10.3976	12.3887	13.4245	13.5277	13.337	13.7525
26	2.40663	2.50593	2.53726	2.51647	2.54002	2.62055	2.66813	2.76462	2.81661	2.85319	2.99214	3.09683	3.28178	3.35579	3.35629	3.43243	3.51182	3.66268	3.6758	3.8079	3.94952	4.22745	4.24917	4.29137	4.34936	4.66795	4.8664	4.93905	5.06818	5.28878	5.44164	5.50876	5.8577	6.06998	6.70284	7.61042	8.4266	8.54885	9.5792	8.75777	10.4011	10.4941	9.91544	11.5746	13.1848	13.5155	13.8525	13.8316	13.9136
27	2.35051	2.43846	2.50593	2.64211	2.82066	2.77498	2.7607	2.83577	2.88377	2.96927	3.08936	3.1878	3.28496	3.36113	3.35642	3.40962	3.4972	3.63533	3.77827	3.95833	4.01127	4.20903	4.23619	4.44907	4.65602	4.81382	4.82263	4.87201	5.03929	5.35492	6.01456	6.56444	6.6908	7.81402	8.77401	8.23785	9.57123	10.5163	9.96383	9.80375	10.5381	10.7194	11.5312	12.7	13.4088	14.0145	14.4675	14.9351	14.7994
28	2.40082	2.45098	2.45441	2.63024	2.71457	2.90058	2.96187	2.98307	2.9864	3.13896	3.17007	3.27384	3.31099	3.46628	3.43047	3.42554	3.57001	3.63757	3.72839	3.84278	3.96888	4.18412	4.27367	4.55443	4.56792	4.92044	5.00585	5.12606	5.18825	5.43734	5.80093	6.62965	7.62531	7.47897	7.97107	9.14465	10.8408	11.75	12.8394	11.501	11.1084	10.9419	12.4874	13.3999	13.6709	14.272	14.4521	15.4792	15.1372
29	2.36113	2.45037	2.5037	2.6423	2.71456	2.88001	3.0228	3.22553	3.26633	3.35579	3.28797	3.30158	3.32254	3.44609	3.58203	3.53468	3.57203	3.84215	3.90352	3.85986	3.96241	4.14428	4.2734	4.50485	4.81348	5.04808	5.11574	5.19082	5.4057	5.59684	5.82901	6.95328	7.38324	8.9215	10.3294	10.2749	11.2557	11.9586	13.6009	13.3098	13.389	12.6719	13.1108	13.5527	14.2457	14.9324	15.5277	15.8589	15.8739
30	2.48109	2.45855	2.5223	2.56304	2.70154	2.88001	2.9842	3.22555	3.33423	3.37419	3.36155	3.46242	3.40045	3.49825	3.64108	3.61454	3.82236	3.90633	4.13157	4.14127	4.22997	4.37583	4.5072	4.77868	4.92401	5.01698	5.32944	5.41827	5.50589	5.86492	6.15196	6.69049	7.60658	8.14261	10.4718	12.0915	12.4943	12.7144	13.8561	14.5108	14.5175	14.6384	14.7556	14.6847	14.9439	14.9317	15.866	16.7671	16.6699
31	2.37186	2.4931	2.58581	2.64216	2.71282	2.78362	2.89787	3.23158	3.36905	3.54113	3.65093	3.67724	3.60258	3.77317	3.85936	3.84051	3.85936	3.96617	4.16819	4.2204	4.37884	4.57311	4.7564	4.91591	5.02465	5.16717	5.41329	5.49834	5.69776	6.08823	6.29557	6.94614	7.42667	8.19841	9.6301	11.5988	12.598	13.8029	14.7529	15.2935	15.6801	15.4605	15.9568	16.1021	16.0644	16.0068	16.6106	17.0083	17.0027
32	2.42506	2.55156	2.5223	2.64524	2.71139	2.88001	2.9842	3.17669	3.44609	3.62473	3.6426	3.71784	3.85936	3.89856	3.98405	4.0272	4.03896	4.13145	4.12777	4.25229	4.44313	4.65639	4.90437	4.96401	5.11325	5.38859	5.47784	5.66075	5.87375	6.12497	6.37381	7.56122	8.45095	9.40266	10.157	11.2554	12.9645	14.4416	15.1111	16.1262	16.7024	16.5883	16.8237	16.9284	17.2052	17.0325	17.2804	17.1517	17.2625
33	2.53047	2.5223	2.61606	2.65278	2.77682	2.93063	3.03692	3.29177	3.46147	3.5887	3.56644	3.64973	3.77776	3.89935	4.15009	4.17845	4.19224	4.22171	4.18111	4.62148	4.62323	4.69689	4.86128	5.04578	5.36561	5.41749	5.69751	5.79704	6.0248	6.4622	6.7807	8.49637	9.67873	9.9215	11.4558	12.5172	13.9973	14.4478	14.6727	16.1761	16.9846	17.0852	17.4688	17.5817	17.6629	17.6293	17.751	18.3667	17.9849
34	2.57671	2.6346	2.69773	2.70401	2.77839	2.9331	2.98994	3.16531	3.36118	3.57806	3.70556	3.77999	3.85898	3.93699	4.12527	4.32915	4.44562	4.36438	4.41283	4.6224	4.63036	4.84491	4.95352	5.09129	5.24825	5.37403	5.57337	5.86003	6.0393	6.9569	7.89076	9.13318	11.2269	11.4417	12.1454	13.268	14.3155	14.7442	15.2685	15.9798	16.8009	17.6457	17.8373	18.3389	18.461	18.616	18.7137	18.5659	18.577
35	2.65445	2.6718	2.71012	2.76689	2.72866	2.92842	3.03543	3.24141	3.36741	3.66634	3.69365	3.83152	4.05788	4.16595	4.27947	4.32335	4.41447	4.55647	4.62526	4.85298	5.01262	5.03796	5.16714	5.28672	5.29477	5.4433	5.64482	5.86987	6.28779	7.44475	8.52059	9.92908	11.8576	13.6291	13.5686	13.9893	14.7131	15.0648	15.8842	16.8937	17.3133	17.979	18.4131	18.8668	18.9642	18.8322	19.0655	19.4138	18.9255
36	2.71013	2.70835	2.86041	2.81462	2.82748	2.94068	3.05553	3.27012	3.41816	3.61281	3.76559	3.76559	3.96929	4.22174	4.36095	4.44186	4.39689	4.67839	4.70951	4.81371	5.0457	5.19986	5.23744	5.43557	5.66723	5.64496	5.91267	6.99263	7.20329	7.7959	9.61948	10.4969	12.619	13.9942	14.8486	14.3578	15.8897	15.448	16.4509	17.1716	17.8233	18.3259	18.983	18.9917	19.5172	19.3675	19.7111	19.8047	20.0465
37	2.70835	2.78075	2.85121	2.99759	3.00377	3.0001	3.14281	3.35629	3.46147	3.56501	3.72171	3.76559	3.98302	4.22038	4.29708	4.27313	4.39918	4.7212	4.89849	4.93981	5.13758	5.26685	5.26702	5.51649	5.62152	6.14761	7.00381	8.57626	8.39991	8.47376	10.13	12.0637	13.7623	14.3455	15.0802	15.2076	15.56	15.8825	17.041	17.2794	18.5037	19.0907	19.489	19.5935	19.9878	20.4601	20.2746	20.1163	20.3338
38	2.70835	2.7935	2.85672	2.92551	3.01937	3.20367	3.20366	3.29874	3.46147	3.53264	3.72888	3.81436	3.89633	4.21531	4.28155	4.37045	4.56963	4.90171	5.07883	5.09785	5.24152	5.45716	5.45515	5.68658	6.04367	6.39491	6.96268	8.03298	9.76111	10.255	11.4276	13.3424	14.1857	15.2328	15.7542	15.8999	16.6374	16.0687	17.111	17.5759	18.556	19.3527	19.5944	19.7772	20.3023	20.7215	20.6789	21.4069	21.3708
39	2.65278	2.75253	2.86608	3.13281	3.20819	3.29874	3.30252	3.36279	3.43326	3.52448	3.66637	3.75311	3.88778	4.15962	4.36867	4.51516	4.6874	4.97309	5.23314	5.28979	5.43644	5.61206	5.69834	5.97373	6.36339	7.3922	7.67668	8.78584	10.4182	11.4543	12.0365	13.9576	14.547	15.2353	16.1647	16.7119	17.714	17.9084	18.0178	18.5835	19.086	19.4764	20.0438	20.442	21.4999	21.7543	21.6945	21.7915	21.7084
40	2.70538	2.76689	2.82792	3.09171	3.31319	3.48108	3.49499	3.49048	3.56083	3.65924	3.72888	3.83147	3.91423	4.13105	4.31204	4.54265	4.72541	5.1184	5.23168	5.43889	5.69173	5.69845	5.73227	6.1029	6.58038	7.63033	9.69734	11.0091	11.1803	12.0188	13.0632	14.1377	14.5579	15.7083	16.5313	17.1882	18.04	18.6206	18.6525	19.3326	19.6766	20.159	20.397	21.1063	21.5336	22.4261	22.5199	22.152	21.8943
41	2.75435	2.77244	2.84925	3.00129	3.29178	3.60238	3.64339	3.72888	3.78217	3.9184	3.91467	3.9783	3.99874	4.089	4.28652	4.50705	4.87553	5.14797	5.30557	5.48718	5.57833	5.69883	5.9659	6.42251	6.71428	8.11448	9.25892	10.7064	12.2034	12.3885	13.1258	13.5433	15.3445	16.2235	17.0789	17.9481	18.3394	18.9383	18.9877	19.6777	20.4492	20.6829	21.0942	21.749	22.1805	22.5484	22.7316	22.2197	22.1493
42	2.76814	2.79709	2.7924	3.04374	3.26813	3.44655	3.72734	3.86111	3.7698	3.89856	4.03772	4.24138	4.33511	4.35829	4.57851	4.74555	4.91434	5.19876	5.26032	5.53379	5.53134	5.69865	5.95084	6.43341	7.04208	7.48092	8.55357	11.0799	12.5309	13.0777	13.7934	14.739	16.3437	17.4238	17.6517	18.2483	18.7501	19.3018	19.7444	20.0522	20.8451	21.4358	21.5139	22.5161	22.5835	22.6524	22.7517	22.4282	22.1743
43	2.71201	2.84502	2.85752	2.98255	3.09292	3.45173	3.64107	3.72888	3.76907	3.84994	3.9945	4.06822	4.28578	4.42877	4.58123	4.80722	4.96665	5.16862	5.31182	5.42537	5.5548	5.92935	6.40304	6.45675	7.0912	8.44371	9.99707	10.9232	12.4126	13.9487	15.0308	15.2233	17.0201	17.8939	17.8369	18.6457	19.0557	19.5057	19.9957	20.5254	21.3072	21.7812	22.0057	22.4535	23.1407	23.3704	23.1303	22.8389	22.7426
44	2.60786	2.81752	2.87257	2.94776	3.05647	3.29378	3.46919	3.6237	3.74852	3.83809	3.85001	4.10129	4.31926	4.40465	4.7158	4.81015	5.07987	5.14468	5.30176	5.39518	5.52046	5.87766	6.29454	6.98882	8.02616	10.2177	10.748	11.4778	13.1161	14.7345	15.0694	15.8413	17.3319	18.3067	18.4153	19.1418	19.5052	19.9813	20.8454	21.1215	21.3317	21.9629	22.0866	22.8293	23.1288	23.5786	23.1871	23.252	23.9126
45	2.62115	2.76689	2.96704	3.13414	3.27629	3.30757	3.44812	3.55382	3.64282	3.77135	3.74847	4.02511	4.3069	4.55443	4.73611	4.94307	5.08502	5.20412	5.39932	5.59371	5.59371	5.98207	6.79769	7.67669	8.17509	8.87184	9.89778	11.3932	13.6326	14.7646	16.264	16.2918	17.6293	18.5453	18.8214	19.3404	20.4461	20.7142	21.241	21.7823	22.013	22.8396	22.9032	23.0639	23.5054	23.7397	23.4016	23.9867	23.9384
46	2.58564	2.66111	2.88079	2.96179	3.12626	3.30618	3.46147	3.54278	3.61703	3.76352	3.80122	3.99384	4.30837	4.55443	4.72167	4.90145	5.05361	5.23314	5.49507	5.5906	5.8214	6.29952	7.24646	8.30418	8.78976	10.2616	10.9722	13.4553	13.9067	14.3277	16.2766	16.9939	18.6404	19.3632	19.4955	20.0713	20.9682	21.4884	21.8041	21.928	22.5221	23.4013	23.6422	23.6094	23.5926	24.2263	23.5781	23.3421	23.6988
47	2.65206	2.74375	2.92317	3.25954	3.28603	3.40045	3.46983	3.72411	3.78377	4.0449	4.15009	4.15166	4.31612	4.69677	4.8333	5.00414	5.20172	5.42048	5.70594	5.83006	6.19678	6.58984	7.46113	8.78446	10.716	10.6722	13.0091	13.5979	14.1846	14.9123	16.4008	17.2375	18.5674	19.1154	19.3832	20.2314	20.9981	21.6051	21.7561	22.2896	22.8709	23.4422	24.2772	24.9186	24.83	24.8032	24.1573	23.7976	23.7772
48	2.74283	2.80202	3.07381	3.24061	3.31201	3.40045	3.46357	3.72888	3.80672	4.15009	4.42682	4.55415	4.60182	4.72209	4.85459	4.936	5.16383	5.53548	5.86717	6.08481	6.54199	6.92964	7.14167	8.36423	11.4871	12.0204	13.5995	14.0824	14.9753	16.1098	16.6563	17.5164	18.3194	19.2458	19.5857	20.2024	21.1967	21.4626	22.1205	22.805	23.8931	24.227	24.8406	24.8674	25.0734	25.395	24.5042	23.8632	23.2167
49	2.72573	2.85348	2.92648	3.15536	3.31387	3.36961	3.5245	3.65843	3.87282	4.21988	4.459	4.55997	4.64863	4.7238	4.97055	5.24843	5.42989	5.55813	5.85748	5.94688	6.61901	6.93286	7.32589	8.92801	10.2575	11.0887	12.534	14.5542	16.1434	16.8726	17.5782	18.3898	19.2755	19.6049	20.0335	20.3838	21.0359	21.9788	22.7673	24.3508	25.0043	24.9261	24.7204	25.0268	25.5732	25.2729	24.4692	24.014	23.3441
50	2.8958	3.12715	3.16357	3.25575	3.30038	3.44728	3.48681	3.64599	3.85059	4.04758	4.23302	4.55443	4.66122	4.91865	5.16368	5.32261	5.42298	5.71631	5.84819	5.98644	6.75801	7.5953	8.59277	9.7846	11.2564	13.5375	14.3858	15.1856	16.6154	17.7638	18.6053	19.121	19.847	20.3344	20.6302	21.0731	21.7231	22.5489	23.832	24.4438	25.2133	25.0471	24.9009	25.0701	25.7467	24.8994	24.3675	23.8028	22.8016
51	3.06377	3.23437	3.36708	3.39465	3.44609	3.52462	3.61207	3.72888	3.85936	3.95437	4.32449	4.4747	4.67699	4.82731	5.17227	5.25546	5.60401	5.97739	6.11512	6.2854	6.57502	7.0566	7.99267	10.4056	12.8146	13.8097	14.5572	15.6138	17.2421	18.1738	18.8631	19.3409	19.7428	20.7039	21.226	21.8693	22.7647	23.6291	24.2062	24.5313	25.623	25.1332	25.3627	25.2005	25.6296	24.9299	24.1473	23.5809	22.9234
52	3.00051	3.29874	3.42327	3.50364	3.52502	3.59523	3.68182	3.77133	3.85936	3.97568	4.23567	4.40238	4.70718	4.85937	5.17259	5.33071	5.52408	5.83165	6.04425	6.51044	7.27549	7.70218	8.66398	10.5212	11.408	13.1937	15.6011	16.5602	17.6512	18.2628	19.4329	20.1198	20.7508	21.5934	21.8123	22.3875	23.0837	23.4967	24.9218	25.6497	26.3846	25.6774	25.627	25.1344	25.5703	25.1211	24.8488	24.081	22.7153
53	2.99497	3.26679	3.48624	3.52448	3.71847	3.72888	3.75295	3.85936	3.9799	4.16215	4.36514	4.66684	4.73404	4.82342	5.00492	5.50968	5.64688	5.87602	6.26007	6.63501	7.18917	7.52227	8.77854	10.7643	12.6428	13.9931	15.2779	16.1127	17.3876	17.9443	19.7379	20.5182	21.2216	21.3189	22.0657	23.1096	24.6019	24.7523	25.0666	25.9332	26.1548	25.9914	26.1274	25.6973	25.1184	24.7595	24.2318	23.7414	22.2376
54	2.89886	3.11066	3.40036	3.52448	3.63266	3.78771	3.84914	4.01671	4.16288	4.2954	4.44013	4.67992	4.95482	5.12378	5.17334	5.40529	5.66177	6.14288	6.40743	6.69962	7.27417	7.717	9.45951	11.0537	11.8107	13.9439	15.6833	16.6567	17.7696	18.3003	19.2074	20.0952	21.6958	22.3036	23.4823	23.911	24.3345	25.3206	25.4887	26.6705	26.373	26.3412	26.1206	26.2246	25.537	24.6075	23.6592	23.0443	22.1113
55	2.79666	2.9678	3.29836	3.51999	3.64107	3.78941	3.76794	3.99447	4.07057	4.27313	4.48796	4.68358	5.02598	5.23314	5.36219	5.64751	5.80045	6.35903	6.52356	6.48997	6.82621	7.20242	8.48156	10.1312	11.9913	14.5021	15.9806	16.7153	17.3348	18.2991	19.4059	20.2841	21.5735	21.9584	22.9569	24.033	24.7359	25.3634	25.7746	26.1138	26.375	26.5445	25.916	26.346	25.7881	24.6615	23.8209	22.6935	22.075
56	2.84428	3.02406	3.27548	3.43979	3.44609	3.68834	3.76559	3.85936	4.1163	4.38015	4.48796	4.64722	4.91697	5.02937	5.25137	5.70649	5.84233	6.14548	6.52463	6.6626	7.2842	8.34272	9.01358	10.4467	11.4062	13.4035	14.9855	16.501	17.6831	18.7022	19.7843	19.726	21.0179	21.7148	22.9846	24.0477	24.1357	25.0485	25.6053	26.2713	26.3375	26.1977	25.6217	25.9187	25.2831	25.0289	23.7605	22.941	21.6914
57	2.89901	3.01634	3.22404	3.36433	3.50672	3.69232	3.81443	3.92476	4.02052	4.27499	4.45348	4.62638	4.8963	5.04549	5.32944	5.62408	5.90655	6.15506	6.48635	6.98938	7.55696	8.77752	9.24873	10.9328	11.3716	12.9282	14.4285	16.8966	17.316	17.8397	19.3676	20.4167	20.7851	21.6263	22.828	23.5068	24.2912	25.1883	25.705	25.858	26.3739	26.6894	26.4584	26.5466	25.9063	25.3298	23.7979	22.4443	21.3047
58	2.82491	2.99683	3.10408	3.28485	3.46147	3.57017	3.68473	3.80231	4.01552	4.28699	4.34805	4.81555	5.02	5.15428	5.48438	5.53473	5.76145	6.14699	6.40387	6.51091	7.62061	9.14537	10.2676	12.3706	13.1991	14.2428	15.5513	16.2179	17.3701	17.9808	19.2165	19.8828	20.6207	21.2752	22.6933	23.1941	24.8085	25.6035	26.5	26.0268	25.8224	26.6873	26.3919	26.3901	26.4074	25.232	23.6414	22.6172	21.4669
59	2.70407	2.84331	2.91741	3.18505	3.35629	3.51911	3.57983	3.75385	3.87028	4.23189	4.33539	4.80404	5.12746	5.27344	5.54176	5.81835	5.99219	6.26696	6.43161	6.67239	7.10399	8.11148	9.11824	11.3993	13.0354	13.8206	15.8447	16.9387	17.653	18.36	18.8364	20.3044	20.6466	21.5258	22.7138	23.3732	24.1496	25.3461	26.8534	27.0716	27.1816	26.9917	27.1117	26.4695	25.9787	25.2436	23.916	22.5839	21.7339
60	2.75145	2.80789	3.02452	3.2464	3.42996	3.60438	3.69616	3.8717	3.94748	4.29577	4.54485	4.85098	5.10454	5.34884	5.62281	5.83724	6.14031	6.32587	6.56259	7.00221	7.01541	8.0246	8.77861	10.2852	11.2419	15.0728	16.663	16.9262	17.6198	18.4683	19.5666	20.5292	21.3029	22.262	23.3719	23.939	24.6644	25.9409	26.8359	27.4545	27.2873	27.3051	27.2932	26.8172	26.1	25.383	24.0605	22.681	21.7393
61	2.61657	2.71003	2.89134	3.1633	3.35629	3.5549	3.68877	4.00731	4.14544	4.34684	4.61995	4.784	4.89147	5.25523	5.64374	5.67005	6.09378	6.3863	6.78201	7.1172	7.58921	8.9174	9.93302	11.5158	12.6933	15.0965	16.6095	16.6826	17.3147	18.2455	19.1474	20.1611	21.4906	22.3611	23.5744	24.4119	25.3776	25.7763	26.3582	26.7632	26.6388	27.6853	27.341	27.0089	26.3472	26.0352	24.5776	22.6832	21.6825
62	2.51437	2.70239	2.73918	2.92587	3.1633	3.46147	3.6758	3.85936	4.15076	4.41797	4.58261	4.79349	5.07834	5.24838	5.44672	5.62266	5.92811	6.28545	6.54572	6.7894	7.21862	8.58418	10.7562	11.9493	13.7223	15.0598	16.4207	16.8414	17.8274	18.1543	19.0892	20.1689	21.1653	21.9152	23.0931	25.148	25.9578	26.5725	26.4008	26.6632	27.2517	28.1199	27.529	26.9116	26.4929	25.7183	24.4462	23.0714	21.5353
63	2.70835	2.91269	2.90209	3.07451	3.22652	3.41683	3.58324	3.81769	4.00661	4.31321	4.51644	4.65865	5.11088	5.23831	5.46762	5.53379	6.02313	6.22391	6.42611	6.65717	7.23306	7.75838	8.78627	10.6188	13.7104	14.8436	16.1696	17.1558	17.5489	18.1276	19.4244	20.6351	21.3409	22.199	23.1524	24.0715	24.9927	25.3787	26.9626	26.64	27.7684	28.3218	28.2752	28.2011	26.977	25.6713	24.7808	23.0525	21.5227
64	2.658	2.81679	3.10776	3.34581	3.38694	3.5153	3.58945	3.85936	4.17621	4.36095	4.36161	4.58193	4.81005	5.15137	5.2596	5.42262	5.70407	6.12616	6.40718	6.75618	6.98454	7.49994	8.61756	10.4379	13.4596	14.8745	15.6495	16.8654	17.6751	18.2203	19.043	20.2226	20.7842	22.2342	23.4713	24.8183	24.9018	26.2588	27.5013	27.7117	28.2687	28.5199	27.7292	27.7274	26.9298	25.4031	24.3401	23.9396	22.2583
65	2.5481	2.63579	2.88108	3.20331	3.40045	3.5397	3.86873	3.89785	4.03193	4.26527	4.36095	4.5187	4.71225	5.06905	5.01186	5.14935	5.4987	5.89326	6.12962	6.76035	6.93426	7.66305	9.28831	10.8886	13.2672	14.7031	15.8765	16.9749	17.6682	18.5708	19.3193	20.3158	21.2807	22.3591	23.6021	23.9634	25.074	26.2001	26.9134	28.002	28.5104	28.5395	27.8162	27.2597	26.7387	26.0579	24.9674	23.8186	22.7325
66	2.55223	2.69	2.86636	3.16803	3.36368	3.54085	3.83787	3.94223	4.0796	4.28975	4.36536	4.60053	4.79456	5.10623	5.09668	5.18322	5.41855	5.7529	6.33255	6.77292	7.12239	7.60464	9.29795	10.7058	12.5901	14.4781	15.4883	16.3423	16.7892	18.0901	18.9542	20.0802	21.2084	22.3794	23.6884	24.201	25.105	25.9252	27.1745	28.1318	27.9566	27.9088	28.1584	27.7436	27.1884	26.4488	25.1908	24.1573	23.1722
67	2.2534	2.4583	2.65225	2.88051	3.19771	3.40045	3.62064	3.85272	3.9414	4.1778	4.3311	4.59437	4.89293	5.09376	5.34612	5.42234	5.65264	5.79151	6.20908	6.55335	6.91284	7.82205	9.23839	11.6878	12.7026	13.3258	14.3685	16.0063	17.0676	17.9047	18.782	19.8219	20.678	22.3782	23.509	24.3851	24.5516	25.3526	25.9396	27.2921	27.6666	27.9944	28.365	27.7774	27.2703	26.8394	25.8564	24.5162	23.8022
68	2.36353	2.44268	2.60414	2.72378	2.99164	3.20967	3.4175	3.73734	3.9972	4.1825	4.39907	4.66605	4.90745	5.07834	5.33147	5.50662	5.61218	6.04117	6.42029	6.71209	6.87238	7.2268	8.61648	10.8612	12.4222	13.8483	15.2176	16.1416	16.8538	17.7837	19.0092	19.897	21.2162	22.0856	22.7411	23.3973	23.9521	24.7741	25.7037	27.0079	27.6124	28.0497	28.3468	27.9402	26.831	26.5478	25.3668	24.5891	23.8426
69	2.23536	2.3538	2.57785	2.74705	2.96463	3.21944	3.46147	3.67175	3.84051	3.95112	4.23546	4.61815	4.81195	5.02873	5.27479	5.51402	5.69812	6.05395	6.3816	6.7739	6.87783	7.23477	8.30232	10.3278	11.3113	13.5929	15.098	15.7604	17.0632	17.6594	18.7632	19.9199	20.9541	21.9824	23.0208	23.9248	24.4182	24.6874	26.2277	26.3001	27.2755	28.3318	28.2197	28.1027	27.7161	26.1762	25.3111	24.9824	24.3847
70	2.30247	2.40239	2.58146	2.73448	2.87433	3.20531	3.46247	3.57409	3.83205	3.86957	3.9778	4.3304	4.64063	4.90601	5.3274	5.58848	5.84091	6.22586	6.6474	6.90472	7.19386	7.45192	8.0302	8.88915	9.8118	11.3031	13.2708	16.1399	17.3526	18.1149	18.6854	19.7076	20.3768	21.1334	22.0103	22.8315	23.8473	24.8902	25.942	25.9257	26.7958	27.8295	28.7138	28.5685	27.7609	26.827	25.9748	25.3057	24.7287
71	2.43136	2.60378	2.69143	2.8213	2.95878	3.18687	3.38049	3.47143	3.65754	3.73599	4.07635	4.23862	4.57626	4.90062	5.29694	5.397	5.66045	5.98377	6.38367	6.85931	7.04047	7.35159	7.92046	8.60123	9.48339	10.7915	13.1397	15.1517	17.3995	17.7945	18.3127	19.428	20.1217	20.7723	21.4279	22.4062	23.1007	24.1897	25.049	26.0488	26.8839	28.1636	28.5075	28.3997	27.6319	27.0086	26.1132	25.3245	24.9544
72	2.43275	2.55403	2.77682	2.8428	2.86817	3.2074	3.39022	3.47134	3.66251	3.87871	4.12775	4.28727	4.48688	4.72066	4.98651	5.26488	5.68299	5.9162	6.30078	6.51927	6.80694	7.26191	7.99724	9.06212	10.4458	11.6735	13.8998	15.0458	15.9545	16.9512	17.9465	18.8345	19.8156	20.7112	21.538	22.4838	22.9155	24.2962	25.4231	25.6279	27.1921	27.3801	28.3779	27.9116	27.6213	27.0542	26.2633	25.9077	25.6031
73	2.39573	2.5163	2.66697	2.78682	2.97438	3.19486	3.48711	3.50072	3.55227	3.83189	4.0323	4.29953	4.53306	4.7849	4.91908	5.16876	5.56194	5.92772	6.30542	6.60756	7.14381	7.27881	7.97465	10.0419	11.8587	13.3612	14.3178	15.5985	15.8181	16.6085	16.9105	18.5085	19.223	20.4563	21.7303	22.9631	23.6354	24.5276	25.1983	25.5495	26.8183	27.0515	27.8339	27.5091	27.5465	27.4935	27.0018	26.7315	25.9007
74	2.3179	2.40208	2.57543	2.7805	3.00671	3.10421	3.27495	3.48966	3.58437	3.75369	3.92032	4.22071	4.43636	4.56007	4.91765	5.10797	5.53773	5.7755	6.21891	6.61155	6.92458	7.20892	7.47355	8.9751	9.22639	10.7082	12.8307	13.6375	14.618	16.1827	17.0719	18.1597	19.2839	20.387	21.5396	22.3879	24.439	24.0104	24.6375	25.4389	26.0867	26.911	27.3831	27.9957	27.6001	27.9268	27.5126	27.2665	27.2699
75	2.32744	2.37819	2.5992	2.75028	2.89722	3.0422	3.31223	3.53265	3.64508	3.81515	3.93319	4.12803	4.43636	4.72003	4.91707	5.09391	5.54094	5.67924	6.00709	6.28328	6.49968	6.98563	7.31953	8.55139	9.67382	11.2417	12.4457	13.4776	14.2849	15.991	17.1659	18.3338	18.8116	19.7288	20.3348	21.6487	22.9535	23.697	23.9836	25.7073	25.9959	26.8122	27.3447	28.0375	28.2403	28.2819	28.4259	28.1304	27.2096
76	2.3179	2.34703	2.4583	2.73266	2.70955	2.83254	3.16465	3.23764	3.49273	3.68943	3.99577	4.16924	4.42028	4.52157	4.81732	5.15123	5.56488	5.74039	5.96559	6.24359	6.42926	6.92855	7.08363	7.49469	8.66683	10.4569	12.6099	13.6181	14.9801	16.4795	17.3658	18.1861	19.0607	19.5579	19.8466	20.7706	21.5085	22.1729	23.4435	24.1163	24.8014	25.1967	26.4448	27.7983	28.5082	27.5064	27.7685	27.2802	27.2671
77	2.23579	2.29477	2.34695	2.58184	2.6872	2.80708	3.16827	3.29068	3.39146	3.54656	3.76559	4.13273	4.25474	4.45365	4.62349	5.04745	5.40163	5.52584	5.682	6.12953	6.30703	6.80468	7.2662	8.28294	9.26342	11.2025	13.2091	13.7491	14.9055	15.8414	16.8881	17.725	18.5654	19.023	19.3751	20.0123	20.9549	21.6816	22.4338	23.8407	24.2442	24.4944	25.8418	27.5074	28.1023	28.1538	27.7823	27.9288	27.271
78	2.24612	2.23284	2.31879	2.43726	2.5148	2.70835	3.02235	3.16923	3.33286	3.46147	3.75508	3.97559	4.18715	4.43636	4.58349	4.82703	5.20994	5.40962	5.62774	6.02876	6.26572	6.64407	7.15025	7.96608	9.34967	11.1059	12.7027	13.1571	14.0138	15.4357	16.3778	17.5675	18.1875	18.9924	19.5628	19.8241	20.5743	21.5234	22.1268	23.7029	24.0827	24.6188	25.2474	27.0935	27.4137	27.5477	27.8043	27.7993	27.8681
79	2.10479	2.26692	2.26751	2.33966	2.48088	2.83461	3.13725	3.22674	3.40045	3.52371	3.7519	3.91016	4.29204	4.51616	4.59522	4.83286	5.17328	5.33506	5.45639	5.96108	6.12616	6.2408	6.78137	7.4637	9.63634	10.4752	12.1379	12.9526	14.069	15.459	16.5212	17.4798	17.9187	18.4026	19.2858	19.8508	20.5666	20.9687	22.4201	23.5726	24.5688	25.0569	25.6987	26.6687	26.95	27.3238	27.2735	27.4259	27.7719
80	2.05031	2.10872	2.24647	2.45864	2.59974	2.80847	3.03271	3.13183	3.32705	3.52448	3.65801	3.81994	4.02477	4.29626	4.49765	4.65146	4.98087	5.28672	5.45639	5.48058	5.82081	5.94789	6.45866	6.8822	8.84849	9.74557	10.227	12.2441	12.904	15.2228	15.4866	16.4895	17.2107	17.7044	17.989	19.2104	19.6921	20.5614	21.752	22.4173	23.7067	24.6469	24.9756	25.8888	26.4995	27.6736	27.3032	27.3488	26.6653
81	2.12235	2.01155	2.18695	2.45176	2.5992	2.68044	2.95086	3.01017	3.20558	3.44226	3.57141	3.76197	4.01465	4.26737	4.46297	4.54389	4.85459	5.19749	5.41769	5.61575	5.84977	5.94216	6.20936	6.5782	7.67102	9.05803	9.94569	11.8651	13.389	14.2966	14.7788	16.2891	16.9306	17.5582	18.2393	18.7381	19.1883	20.1904	20.9093	21.8499	23.1597	23.5408	24.4979	25.2191	25.8849	26.2078	26.7459	27.3514	27.2187
82	1.97634	2.04176	2.10437	2.36698	2.51461	2.60772	2.80652	2.93209	3.12559	3.27378	3.50719	3.67247	3.9576	4.21055	4.32473	4.56663	4.96866	5.13328	5.36845	5.52226	5.65474	5.80368	6.19913	6.29914	6.83538	8.10419	9.51213	10.8488	10.5908	12.3939	14.1048	14.9509	16.4947	17.0066	17.4157	17.6369	19.0385	19.9108	20.3567	21.6577	22.4014	23.4399	23.9494	24.1547	25.4609	25.4779	25.561	26.457	26.7649
83	2.00304	2.14014	2.12837	2.22396	2.44666	2.60358	2.70914	2.88321	2.86297	3.05225	3.42978	3.62785	3.82229	4.06351	4.268	4.49325	4.83068	5.06793	5.41769	5.46629	5.52587	5.76248	6.07838	6.28882	6.62108	7.0502	7.74535	9.64654	10.9825	11.5138	12.1409	13.8928	15.4215	16.3284	16.9445	18.1316	18.8051	19.4359	19.8165	21.3462	21.9504	22.5105	23.3738	24.054	24.8109	25.3629	25.6199	26.378	26.6677
84	2.07619	2.20372	2.25692	2.32767	2.46071	2.58234	2.68791	2.79868	2.90384	3.05305	3.41218	3.62427	3.78597	4.06351	4.17204	4.35614	4.45586	4.70787	5.10875	5.39785	5.69794	5.97034	6.19372	6.36563	6.74433	6.9526	7.29782	8.64898	9.54996	10.6973	11.6806	12.9648	14.4288	15.2943	16.422	18.1042	18.4757	19.2648	19.4905	20.4416	20.6359	21.4583	21.6365	22.8839	23.6533	24.2611	24.6754	25.4836	26.4503
85	1.84488	1.84414	2.12186	2.16089	2.1874	2.41919	2.61745	2.71728	2.81638	3.10025	3.41445	3.57489	3.68423	3.89291	4.08455	4.26067	4.55244	4.76526	5.04206	5.37557	5.66807	5.8748	6.17801	6.3178	6.71159	6.87107	7.29935	7.99527	8.84938	9.96129	10.3933	12.0371	13.3835	14.9108	16.6289	18.1514	18.3899	19.3918	19.6242	20.3449	20.6263	20.7056	21.459	22.0014	22.5622	23.3849	24.008	24.4876	25.1454
86	1.75232	1.83939	1.84277	2.0009	2.09341	2.2925	2.5768	2.71778	2.83201	3.12381	3.27089	3.45216	3.60461	3.68452	3.8254	4.01639	4.20282	4.2514	4.72977	4.99762	5.39785	5.57101	5.78125	6.13611	6.38085	6.60973	7.08152	7.52162	7.97715	8.41324	9.24084	11.3151	12.9228	14.6608	15.6745	17.7036	18.1512	18.6016	19.3931	19.9468	20.3367	20.4719	20.4855	21.047	21.4948	23.1229	23.9755	24.2707	24.8189
87	1.42512	1.62882	1.64049	1.73013	1.84212	2.06782	2.32546	2.67473	2.80708	2.93663	3.02249	3.19852	3.42214	3.73836	3.81838	3.98023	4.1725	4.30281	4.48446	4.87196	5.22672	5.45357	5.61577	5.83695	6.02239	6.26338	6.57613	7.24628	8.98115	9.34782	9.8488	10.406	13.0326	14.2358	15.6823	16.7087	17.1569	18.1899	19.006	19.2704	19.1221	19.7378	19.6829	20.2058	21.0946	22.3499	22.4825	23.4182	23.9738
88	1.43535	1.59504	1.609	1.78691	1.84212	2.1661	2.32546	2.53917	2.71778	2.89985	3.10177	3.20299	3.37109	3.70546	3.85398	3.89154	4.05846	4.30495	4.48696	4.7052	5.0451	5.30236	5.48515	5.70197	5.91682	6.18855	6.71603	6.90828	7.36377	8.14064	8.19768	10.4855	12.2356	14.597	16.2893	16.3341	16.245	16.832	17.7982	18.5023	19.0275	19.1177	19.5471	19.6671	20.2481	20.6782	21.1724	21.9573	22.5076
89	1.36872	1.40602	1.60819	1.75557	1.8438	2.09129	2.44115	2.68585	2.71778	2.7214	2.87439	3.21398	3.40045	3.55898	3.72747	3.82116	3.92497	4.09899	4.30772	4.53152	5.02659	5.2342	5.40742	5.72576	6.00596	6.21531	6.28826	6.66975	7.14006	8.65554	9.40095	9.82928	11.7576	13.5909	14.9955	15.7177	15.645	16.8017	17.3902	17.7832	18.8215	18.8778	18.8026	19.0471	19.6538	20.0674	20.2782	20.9925	21.3436
90	1.25562	1.2552	1.53895	1.72437	1.89669	1.98724	2.2148	2.4251	2.60209	2.68668	2.80263	3.13474	3.24042	3.37104	3.59509	3.75111	3.86882	3.95809	4.09899	4.42125	4.82937	4.98566	5.25158	5.50022	5.63812	5.98721	6.33197	6.47599	6.77938	7.30632	7.96778	8.54925	10.0603	11.9395	13.8935	14.3442	15.3326	16.0408	16.4307	16.7722	17.4587	17.7937	17.8441	18.3386	19.3829	19.6252	19.7974	20.2629	21.0373
91	1.29269	1.29176	1.55906	1.72674	1.85808	2.04368	2.23067	2.32485	2.5703	2.71255	2.72759	3.00019	3.26405	3.40166	3.49607	3.8003	3.80323	3.87871	4.12996	4.48612	4.65451	4.97765	5.08357	5.30801	5.73399	5.88448	6.12811	6.46205	6.7574	6.90668	7.09582	7.58356	8.56894	9.23358	11.2659	13.4028	14.5215	15.3756	15.4562	15.6639	16.3581	16.5623	16.9778	17.4871	18.5727	19.1152	19.6538	19.4055	19.887
92	1.51393	1.52967	1.59504	1.84463	2.05214	2.16807	2.3693	2.51927	2.65903	2.71778	2.78173	2.85433	3.20299	3.32741	3.33318	3.3292	3.46356	3.80945	4.21052	4.27667	4.48476	4.76492	5.02233	5.34373	5.5868	5.80123	6.01662	6.30899	6.60903	6.88736	6.85903	7.69081	8.04298	8.29412	9.71431	12.2072	12.6592	14.7715	15.298	15.2279	15.4819	16.0841	16.3689	16.9362	17.3079	17.3311	18.1011	18.3782	19.2647
93	1.53099	1.51638	1.50243	1.68323	1.83915	1.89669	2.16807	2.39641	2.32632	2.67608	2.78128	2.83833	2.9131	3.16998	3.2112	3.27271	3.52238	3.84051	4.16488	4.03164	4.48069	4.57964	4.93804	5.06709	5.49416	5.49669	5.72388	6.0638	6.35228	6.4344	6.5158	6.67369	6.98466	7.81616	9.60292	12.0959	12.8141	14.5973	14.9507	15.4697	15.3469	15.3394	16.0873	16.6247	16.7353	16.6707	16.929	17.4973	18.5241
94	1.6291	1.58512	1.6088	1.75589	1.72394	1.79939	2.13547	2.25688	2.26705	2.71778	2.78184	2.88667	2.99089	3.20804	3.26015	3.41855	3.67506	3.87735	3.86671	3.86884	4.15425	4.54973	4.71661	4.98071	5.30601	5.41642	5.70588	5.98409	6.54213	6.5264	6.57546	6.48844	7.12264	7.21995	8.12435	9.8673	10.8895	13.3003	14.2162	14.6889	15.037	14.9523	15.5883	15.9785	16.2333	16.6796	16.8616	17.6437	18.0183
95	1.76224	1.65651	1.59054	1.76224	1.76224	1.83765	1.96241	2.16807	2.25688	2.71778	2.87851	2.81204	3.06881	3.22915	3.44311	3.50066	3.73313	3.80231	3.80231	3.85252	4.08915	4.43368	4.5646	4.846	4.88181	5.31578	5.51158	5.62528	5.8932	5.98963	6.2883	6.23652	6.50129	6.85763	7.76355	8.65057	9.47374	11.0903	12.0248	12.3286	13.2173	14.3526	14.2502	15.4013	15.5338	16.1843	16.4425	16.697	16.8504
96	1.76248	1.78303	1.76224	1.76308	1.76224	1.95862	1.97461	2.15672	2.16894	2.49282	2.78327	2.80435	3.00037	3.11269	3.39868	3.44311	3.60088	3.77163	3.76734	3.80408	3.88467	4.25959	4.28193	4.55443	4.79414	4.97897	5.37073	5.57197	5.67674	5.89118	6.09232	6.15361	6.37983	6.82024	7.19889	7.56165	8.34394	9.86384	10.1782	10.6715	11.6599	13.2434	13.7422	14.4799	15.173	15.8089	16.1142	15.9465	15.8409
97	2.01221	2.01485	1.76273	1.76224	1.84647	1.96204	2.07593	2.16807	2.31336	2.49695	2.68866	2.78128	2.8377	2.99477	3.15181	3.40009	3.47836	3.55888	3.61905	3.74724	3.92055	4.27947	4.33514	4.39158	4.49306	4.707	5.22446	5.47729	5.58731	5.71388	5.91111	6.04192	6.31565	6.6225	6.84198	7.3134	7.43539	7.49947	8.65032	9.38897	10.5043	12.0209	12.6714	14.075	14.851	15.0998	15.2384	14.9639	14.4385
98	1.76224	1.76299	1.64051	1.62066	1.81569	1.97966	2.00729	2.2253	2.29225	2.44391	2.5094	2.5521	2.80025	2.91276	3.11269	3.41416	3.49273	3.60832	3.56546	3.73604	4.00253	4.1636	4.24921	4.36378	4.41665	4.75345	5.19512	5.25893	5.60715	5.69007	5.92487	6.03986	6.24587	6.57401	6.69839	6.86287	7.24526	7.13024	7.50843	8.13671	9.65833	10.7668	11.2684	13.046	13.8434	13.9524	14.0785	14.502	13.7992
99	1.75038	1.61399	1.59561	1.70767	1.73871	1.86293	1.93402	2.10294	2.21238	2.40897	2.5104	2.57899	2.78996	2.84202	3.08836	3.04599	3.20343	3.39839	3.50263	3.74758	3.82523	4.02011	4.24948	4.38783	4.40441	4.68365	5.06201	5.30409	5.61639	5.6087	5.62528	5.88636	6.20916	6.48309	6.3633	6.9442	7.01528	6.93567	6.88109	7.90021	9.19437	9.75467	10.6511	11.8259	11.6376	12.9908	13.5368	13.821	13.6361
100	1.6932	1.74998	1.75033	1.59562	1.6841	1.82074	1.9513	2.01064	2.16999	2.36279	2.51437	2.6262	2.61657	2.91276	2.97477	2.92498	3.04717	3.17	3.3998	3.67649	3.68036	3.97496	3.96484	4.08242	4.11347	4.24932	4.80498	5.04036	5.45172	5.37227	5.52395	5.61285	5.97016	6.23512	6.13097	6.41418	6.52756	6.48683	6.57752	7.49179	7.42206	8.18157	10.2005	9.96492	10.2401	12.4371	13.3721	13.2943	13.4794
101	1.56772	1.75033	1.7629	1.75629	1.75869	1.89991	1.9793	1.99497	2.24445	2.48823	2.5104	2.68689	2.65617	2.79666	2.82313	2.70835	2.74046	2.91766	3.2233	3.44021	3.67489	3.74674	3.80566	3.89856	3.99741	4.14068	4.55802	4.77624	5.05499	5.09669	5.35824	5.56103	5.63463	5.91803	6.11724	6.31043	6.43259	6.47399	6.48825	6.45581	6.58503	7.22634	7.99213	7.73218	9.24726	10.4587	12.0511	11.8078	11.2063
102	1.63702	1.76206	1.76299	1.79848	1.70767	1.88728	1.95275	1.94187	1.99746	2.29059	2.27722	2.44292	2.51437	2.56621	2.74677	2.66656	2.75039	2.90792	3.17669	3.36506	3.57258	3.76874	3.70589	3.86547	3.88248	4.08622	4.41412	4.55548	4.75322	4.97504	5.10753	5.19314	5.29693	5.62408	5.92807	5.91354	6.1241	6.32835	6.24481	6.25153	6.50022	6.8091	7.03424	7.25159	7.75896	8.81442	9.21243	10.5203	10.2459
103	1.7083	1.76224	1.87337	1.86934	1.7866	1.92993	1.96971	2.05915	2.1272	2.30107	2.30485	2.3793	2.5104	2.63443	2.54841	2.70835	2.80297	2.99965	3.23165	3.38079	3.40159	3.50921	3.78346	3.81515	3.78269	3.88624	4.21806	4.43455	4.44013	4.59392	4.78327	4.9282	4.98861	5.13548	5.30491	5.60967	5.884	6.16471	6.23816	6.0404	6.42096	6.66545	6.77212	7.0054	7.48718	8.38401	9.38171	9.5186	9.42595
104	1.71566	1.79749	1.86409	1.62778	1.66487	1.70767	1.78506	1.92993	1.9592	2.15716	2.27722	2.30286	2.5104	2.51083	2.61423	2.68436	2.77975	3.20299	3.36356	3.35259	3.41533	3.53588	3.59844	3.80843	3.728	3.78269	4.08411	4.0081	4.1942	4.33071	4.44179	4.8468	5.01402	5.00165	5.01284	5.28672	5.572	5.93861	5.9716	6.07297	6.35019	6.6218	6.69899	6.74316	6.81871	6.84161	7.86724	8.76111	9.23711
105	1.75474	1.76313	1.64353	1.60149	1.70836	1.63492	1.66616	1.85472	2.05165	2.12777	2.23834	2.32485	2.5104	2.5106	2.47671	2.58455	2.77725	3.16167	3.20392	3.20346	3.39945	3.42029	3.59332	3.55737	3.59916	3.80347	3.89386	3.89196	4.00056	4.18291	4.44647	4.47836	4.88729	4.9874	4.87745	5.28672	5.60735	5.76725	6.06703	6.03254	6.18229	6.36699	6.54312	6.43592	6.52944	6.79569	6.89626	7.52604	8.59297
106	1.91624	1.86891	1.71462	1.78091	1.70842	1.67362	1.72156	2.08473	2.05744	2.05317	2.07329	2.26326	2.24072	2.25688	2.44438	2.51399	2.74705	3.04999	3.0998	3.22561	3.20299	3.39173	3.409	3.4991	3.5588	3.80352	3.77066	3.76613	3.99184	4.18333	4.30931	4.50134	4.79605	4.83617	4.87525	5.18393	5.28721	5.63684	5.93744	5.94768	6.19356	6.18443	6.18334	6.3743	6.47344	6.70474	6.71923	7.2523	8.39192
107	1.89276	1.78999	1.75862	1.80012	1.85948	1.9592	1.8828	1.87808	1.92392	1.8853	2.06125	2.23753	2.26035	2.31446	2.32485	2.3763	2.78443	2.83134	3.19077	3.0998	3.15579	3.38162	3.37536	3.34089	3.41696	3.46375	3.74482	3.8564	4.09406	4.19597	4.27388	4.54746	4.67652	4.55682	4.80714	5.07924	5.30389	5.37644	5.694	6.15894	6.32091	5.93763	6.07956	6.26549	6.30801	6.3067	6.27851	6.89448	6.89808
108	1.94878	1.84397	1.80012	1.98018	1.87337	1.98607	1.82687	1.92227	1.82252	1.94928	2.12723	2.2593	2.26529	2.27956	2.23753	2.38967	2.51135	2.64384	2.884	2.73019	2.98617	3.26266	3.38049	3.36604	3.41533	3.36588	3.56999	3.6633	3.93145	4.21238	4.37611	4.49019	4.50659	4.54061	4.60521	4.83617	5.19821	5.28046	5.39152	5.70648	5.80288	5.65192	5.87447	6.18334	6.03271	5.94185	6.07386	6.20095	6.24538
109	1.84981	1.85169	1.72962	1.89471	1.81487	1.71018	1.78452	1.8248	2.03601	1.87865	2.06127	2.23753	2.26917	2.26499	2.25143	2.36999	2.33597	2.59281	2.78747	2.61439	2.82792	3.19009	3.3266	3.29079	3.42029	3.43657	3.5252	3.59855	3.90478	4.20192	4.3585	4.46487	4.38475	4.54312	4.49242	4.57827	4.87047	5.02079	5.16657	5.3452	5.46644	5.63936	5.57691	5.8018	5.70452	5.82779	5.76894	5.83045	5.78873
110	1.60149	1.65382	1.60201	1.72669	1.79894	1.91319	1.87337	1.87337	2.06091	2.05478	2.03606	2.06126	2.13774	2.12943	2.33576	2.2385	2.39393	2.54038	2.60924	2.56544	2.67214	2.94252	3.40797	3.33809	3.28529	3.27096	3.46025	3.63834	3.87044	4.13316	4.21806	4.41019	4.34095	4.29109	4.5165	4.66006	4.76486	4.78291	4.73916	4.99212	5.14486	5.18708	5.46222	5.46532	5.49799	5.65614	5.54083	5.5584	5.45745
111	1.55876	1.6021	1.6016	1.83407	1.8081	1.90702	1.94928	2.01222	1.94928	1.94928	2.03152	1.93009	1.98509	2.1088	2.06961	2.23853	2.26723	2.44937	2.28714	2.53917	2.64302	2.79754	2.8895	3.09214	3.14439	3.19062	3.37512	3.52448	3.71342	3.83832	3.87687	4.14865	4.27032	4.1512	4.40816	4.62524	4.5415	4.48667	4.68757	4.7438	4.88018	5.04075	5.14443	5.24722	5.28672	5.31686	5.41315	5.52488	5.48081
112	1.49929	1.51162	1.63355	1.7866	1.85105	1.95339	2.04557	2.06108	1.9558	1.94928	1.91166	1.9996	1.92993	1.99591	2.22556	2.15257	2.23753	2.0616	2.07421	2.27991	2.59027	2.78128	2.8495	2.99145	3.06693	3.15707	3.38094	3.52448	3.63157	3.66345	3.80008	4.05474	4.20141	3.92085	4.2064	4.33167	4.23662	4.40549	4.51425	4.71932	4.83375	4.78566	5.07835	5.07693	5.02665	5.13701	5.03568	5.28186	5.28672
113	1.46754	1.46876	1.68195	1.83378	1.78359	1.88434	1.94604	2.06669	2.16385	2.06167	1.87509	1.92067	1.85105	1.72156	1.83166	1.95121	1.87376	1.94297	2.07215	2.51189	2.54335	2.5957	2.65744	2.91041	3.01268	3.19062	3.40585	3.41506	3.52448	3.55602	3.57359	3.86047	3.82136	3.74674	3.88093	3.91741	4.0474	4.03886	4.24331	4.5783	4.67152	4.68795	4.53184	4.672	4.91523	5.07835	4.90371	5.03034	4.95851
114	1.49929	1.48062	1.70947	1.72777	1.82791	1.83765	1.85817	1.87382	1.93547	1.87509	1.92944	2.02941	1.74294	1.76224	1.82712	1.87337	1.87337	1.79194	2.12018	2.40566	2.42042	2.42422	2.58233	2.74337	2.96206	3.19062	3.34077	3.23631	3.26299	3.2027	3.49764	3.59964	3.54145	3.76559	3.76559	3.74867	3.81925	3.95194	3.99618	4.51425	4.49006	4.46687	4.38835	4.73265	4.70351	4.75992	4.85693	4.73531	4.75187
115	1.49929	1.67776	1.50017	1.5063	1.7064	1.82116	1.83795	1.8631	1.90211	1.91882	1.80473	1.69004	1.73456	1.68026	1.6827	1.87415	1.88477	1.94184	2.2534	2.37266	2.53917	2.47702	2.58539	2.75685	2.82249	2.92497	3.01005	3.09979	3.09979	3.08716	3.34411	3.34592	3.33545	3.42029	3.25402	3.38166	3.59422	3.64702	3.76612	3.91781	3.85715	3.80946	4.09972	4.51324	4.67152	4.4932	4.47081	4.34	4.56106
116	1.49759	1.49929	1.58036	1.65529	1.76224	1.70767	1.76224	1.76224	1.88274	1.83506	1.73369	1.65912	1.59157	1.5921	1.70852	1.94184	2.06665	2.16054	2.32079	2.59082	2.64383	2.64422	2.70835	2.76812	2.84949	2.89806	2.89772	2.98072	2.89465	3.00051	3.19076	3.1775	3.12778	3.06862	3.17685	3.24239	3.47134	3.47707	3.46942	3.63653	3.51089	3.64675	3.75262	4.17298	4.17106	4.31574	4.23128	4.26685	4.48264
117	1.56194	1.49929	1.52459	1.56882	1.65715	1.68187	1.76334	1.82175	1.79078	1.85581	1.70426	1.68416	1.52712	1.49903	1.76224	1.93485	2.15704	2.23839	2.5394	2.64336	2.64377	2.64871	2.64469	2.77349	2.74236	2.78128	2.81407	2.862	2.90251	2.96792	2.90539	2.90251	2.81881	2.97571	3.07597	3.19009	3.23072	3.08047	3.20245	3.24058	3.28485	3.23635	3.54119	3.7365	4.02023	4.1513	4.20688	4.1513	4.34976
118	1.73056	1.49985	1.58654	1.49957	1.50475	1.73732	1.85105	1.92379	1.84542	1.84212	1.78705	1.72205	1.60794	1.68117	1.87337	2.15934	2.41885	2.56376	2.44703	2.54515	2.72303	2.64422	2.53811	2.59945	2.60764	2.67779	2.69604	2.83784	2.80957	2.90268	2.93463	2.69093	2.92722	2.78128	2.84985	3.1092	3.04289	2.99093	3.09535	3.08667	3.36081	3.22094	3.46197	3.58712	3.76112	3.9959	4.13374	4.14513	4.17242
119	1.72295	1.67482	1.82525	1.71016	1.50211	1.592	1.8209	1.85223	1.85681	1.86545	1.91091	1.83423	1.89616	1.93531	2.04205	2.14269	2.339	2.51112	2.53986	2.5265	2.64422	2.50959	2.73617	2.50111	2.57951	2.62725	2.66879	2.90234	2.90251	2.90772	2.9384	2.81185	2.84875	2.84966	2.94957	2.93837	2.94419	2.96466	3.17602	3.27228	3.17287	3.19009	3.41533	3.41165	3.50364	3.97332	4.05084	4.01488	4.08343
[truncated: 71 more columns]
