# Supplementary material for: Unexpected long-term variations of Saturn’s ring current revealed by energetic neutral atom imaging
Source: Research Square preprint supplement (doi:10.21203/rs.3.rs-3271171/v1), 2023-09-18
Supplement: Supplementary file 21 [file dc9b75e0e966c4a8043cdf6d.xlsx]

## Sheet: fi2
	0	1	2	3	4	5	6	7	8	9	10	11	12	13	14	15
0	0.0679332	0.0960565	0.12297	0.144443	0.157625	0.161667	0.157518	0.147236	0.133217	0.117615	0.102057	0.0875856	0.074746	0.0637203	0.0544614	0.0467979
1	0.0790324	0.109991	0.139412	0.162881	0.177407	0.182052	0.177749	0.16663	0.151235	0.133909	0.116467	0.100113	0.0855076	0.0729057	0.062295	0.0535117
2	0.0925004	0.126697	0.158916	0.184538	0.200442	0.205625	0.201033	0.188893	0.171908	0.152621	0.133045	0.114555	0.0979356	0.0835207	0.0713368	0.0612304
3	0.10826	0.146036	0.181282	0.209164	0.22644	0.232071	0.227045	0.213709	0.194942	0.173492	0.151576	0.13074	0.111898	0.0954667	0.0815148	0.0699008
4	0.125965	0.167587	0.20603	0.236231	0.254841	0.26081	0.255205	0.240516	0.219812	0.196052	0.171652	0.148328	0.12712	0.108527	0.0926629	0.0793976
5	0.144933	0.190593	0.232351	0.2649	0.284788	0.290986	0.284671	0.268504	0.245762	0.219612	0.192667	0.1668	0.143172	0.122358	0.104512	0.0895174
6	0.164138	0.21396	0.259124	0.294047	0.31517	0.321507	0.314382	0.296659	0.271838	0.2433	0.213842	0.185484	0.159489	0.136499	0.116699	0.0999827
7	0.18228	0.236337	0.284996	0.322347	0.344706	0.351141	0.343156	0.323856	0.296985	0.266144	0.234303	0.20361	0.175414	0.150404	0.128788	0.11046
8	0.19796	0.256279	0.30854	0.348428	0.372093	0.378655	0.369828	0.348992	0.320167	0.287181	0.253171	0.220397	0.190269	0.163505	0.140316	0.120588
9	0.209909	0.272466	0.328456	0.371059	0.396182	0.402982	0.3934	0.371131	0.340503	0.305587	0.269688	0.235155	0.203442	0.175271	0.150842	0.130018
10	0.217228	0.283925	0.343776	0.389328	0.416142	0.423367	0.413181	0.389632	0.357389	0.320791	0.283308	0.247375	0.214463	0.185283	0.160003	0.13845
11	0.219565	0.2902	0.354018	0.40278	0.431575	0.439471	0.42888	0.404231	0.370574	0.332541	0.293778	0.256795	0.223072	0.193285	0.167556	0.145665
12	0.217161	0.291418	0.359246	0.411475	0.442565	0.451409	0.440632	0.415067	0.380183	0.340933	0.301154	0.263429	0.229236	0.199207	0.173404	0.151548
13	0.210776	0.288233	0.360041	0.415958	0.449648	0.459719	0.448966	0.422645	0.38668	0.346376	0.305776	0.267543	0.233146	0.203164	0.177594	0.156092
14	0.201514	0.281691	0.357382	0.417159	0.453723	0.46527	0.454718	0.427754	0.39079	0.349518	0.308208	0.269607	0.235173	0.205431	0.180306	0.159389
15	0.190608	0.27304	0.352489	0.416259	0.45593	0.469156	0.458924	0.43136	0.393403	0.351162	0.309154	0.270219	0.235809	0.206389	0.181813	0.161607
16	0.17924	0.263556	0.346664	0.414546	0.45752	0.472573	0.462712	0.434513	0.395476	0.352167	0.309373	0.270036	0.235602	0.206478	0.182445	0.162964
17	0.168415	0.254415	0.34117	0.413308	0.459757	0.476732	0.467214	0.438252	0.397954	0.353381	0.309614	0.269708	0.235104	0.206148	0.182548	0.163697
18	0.158913	0.246619	0.337152	0.413753	0.463846	0.482783	0.4735	0.443553	0.401713	0.355583	0.310562	0.269831	0.234823	0.20582	0.182451	0.16404
19	0.151294	0.240986	0.335614	0.416975	0.470893	0.491782	0.48254	0.451287	0.407525	0.35945	0.312811	0.270917	0.235195	0.205856	0.182441	0.164195
20	0.145949	0.238173	0.337421	0.423954	0.481892	0.50467	0.495184	0.462201	0.416039	0.365544	0.316842	0.27338	0.236573	0.206548	0.182748	0.164323
21	0.143159	0.238728	0.343333	0.435563	0.497723	0.52226	0.512143	0.476901	0.427765	0.374295	0.323019	0.277527	0.239211	0.208104	0.18353	0.164531
22	0.143155	0.243134	0.354039	0.452581	0.519145	0.545218	0.533968	0.495829	0.443058	0.385989	0.331577	0.283549	0.243265	0.210644	0.184873	0.164865
23	0.146167	0.251857	0.370174	0.47569	0.546773	0.574031	0.561011	0.519229	0.462087	0.400749	0.342605	0.291513	0.248781	0.214192	0.186781	0.165311
24	0.152456	0.26536	0.392317	0.505443	0.581019	0.608933	0.593354	0.547085	0.484787	0.418493	0.356023	0.301343	0.255684	0.218675	0.189176	0.16579
25	0.16233	0.284105	0.420951	0.542186	0.621999	0.64981	0.630721	0.579045	0.510798	0.438891	0.371544	0.312794	0.263763	0.223906	0.191895	0.166163
26	0.176124	0.308497	0.456373	0.58594	0.669394	0.696062	0.672357	0.614322	0.539388	0.461307	0.388636	0.325426	0.272657	0.229583	0.194688	0.166241
27	0.194159	0.338793	0.498553	0.636227	0.722281	0.746458	0.71691	0.651604	0.569383	0.484747	0.406484	0.338582	0.281834	0.235285	0.197228	0.165792
28	0.216646	0.374955	0.546938	0.691871	0.778953	0.798995	0.762334	0.688992	0.599134	0.507837	0.423976	0.351378	0.290603	0.240476	0.19912	0.164564
29	0.243557	0.41645	0.600238	0.750802	0.836788	0.850832	0.805874	0.724011	0.626533	0.52885	0.439729	0.362728	0.298128	0.244535	0.199933	0.162306
30	0.274442	0.462032	0.656219	0.809931	0.892213	0.89834	0.844161	0.753728	0.64913	0.545797	0.452167	0.371409	0.303487	0.246797	0.199234	0.1588
31	0.308245	0.509556	0.711599	0.865172	0.940863	0.937336	0.873482	0.775003	0.664356	0.556621	0.459672	0.376179	0.305758	0.246625	0.196638	0.153893
32	0.343147	0.555899	0.76213	0.911701	0.977952	0.963515	0.890202	0.784878	0.669845	0.55945	0.460785	0.375926	0.304139	0.243492	0.191867	0.147521
33	0.376541	0.597099	0.802944	0.944468	0.998884	0.973054	0.891308	0.781031	0.663809	0.552899	0.454437	0.369853	0.298072	0.237065	0.184793	0.139735
34	0.405201	0.628758	0.829178	0.958954	1	0.963283	0.874969	0.762223	0.645389	0.536343	0.44016	0.357623	0.287354	0.227274	0.175479	0.130698
35	0.425704	0.646719	0.836807	0.952002	0.979308	0.933252	0.840951	0.728607	0.614877	0.510084	0.418221	0.339464	0.272198	0.21435	0.164179	0.12068
36	0.43505	0.647878	0.823481	0.922527	0.936981	0.884034	0.790781	0.681795	0.573753	0.475372	0.389622	0.316169	0.253236	0.198806	0.151321	0.110027
37	0.431344	0.630919	0.789129	0.871872	0.875463	0.81865	0.727566	0.624659	0.524489	0.434235	0.355977	0.288994	0.231433	0.181378	0.137452	0.0991213
38	0.414301	0.59671	0.736101	0.803665	0.799116	0.741603	0.65552	0.560887	0.470175	0.389182	0.319275	0.259482	0.20796	0.162924	0.123174	0.0883432
39	0.385398	0.548212	0.66878	0.723203	0.713487	0.658151	0.579298	0.494423	0.414054	0.342827	0.281588	0.229239	0.184025	0.144315	0.109066	0.0780295
40	0.347571	0.489892	0.592761	0.636522	0.624404	0.573502	0.503326	0.428916	0.359086	0.297548	0.244798	0.19973	0.160728	0.126332	0.0956299	0.0684482
41	0.304581	0.426834	0.513846	0.549423	0.537134	0.492132	0.431267	0.367313	0.307632	0.255231	0.210407	0.172127	0.13895	0.109589	0.0832479	0.0597848
42	0.260241	0.363837	0.437151	0.466709	0.455789	0.417367	0.365732	0.311652	0.261297	0.217155	0.179435	0.147232	0.119296	0.094508	0.0721683	0.0521423
43	0.217776	0.304724	0.366513	0.391757	0.383072	0.351244	0.308221	0.263049	0.220934	0.183995	0.152429	0.125481	0.102095	0.0813121	0.0625121	0.0455515
44	0.179446	0.252025	0.304287	0.326452	0.320319	0.294626	0.259264	0.221829	0.186762	0.155919	0.129528	0.106994	0.0874439	0.0700606	0.0542951	0.0399872
45	0.146474	0.206983	0.251463	0.271392	0.26775	0.24746	0.218658	0.187739	0.158536	0.132723	0.110579	0.0916622	0.0752616	0.0606893	0.0474572	0.035387
46	0.119206	0.1698	0.20798	0.226234	0.224809	0.209086	0.185732	0.160164	0.135731	0.113979	0.0952478	0.0792292	0.0653581	0.053057	0.0418915	0.0316682
47	0.0973708	0.139976	0.173101	0.190061	0.190497	0.178516	0.159584	0.138319	0.117693	0.0991579	0.0831135	0.0693715	0.0574894	0.0469848	0.0374705	0.0287421
48	0.080352	0.116635	0.145748	0.161692	0.163636	0.154659	0.139252	0.121391	0.103751	0.087716	0.0737456	0.0617537	0.0514016	0.0422872	0.0340652	0.0265244
49	0.0674055	0.0987748	0.124753	0.139913	0.143064	0.136469	0.123835	0.108629	0.0932882	0.0791573	0.0667492	0.0560671	0.04686	0.0387937	0.0315592	0.0249429
50	0.0578042	0.0854369	0.109025	0.123613	0.127741	0.123029	0.112559	0.0993913	0.0857864	0.0730644	0.0617922	0.0520518	0.0436669	0.0363609	0.0298567	0.023941
51	0.0509176	0.0757933	0.0976316	0.111855	0.116804	0.11359	0.104799	0.0931718	0.0808379	0.0691121	0.0586171	0.0495065	0.04167	0.0348799	0.0288872	0.0234808
52	0.046245	0.0691844	0.0898316	0.103904	0.109584	0.107581	0.100088	0.0895977	0.078149	0.06707	0.0570434	0.0482922	0.0407653	0.0342786	0.0286073	0.0235441
53	0.0434203	0.0651223	0.0850771	0.0992181	0.105598	0.104601	0.0981078	0.0884246	0.0775346	0.0667983	0.0569659	0.0483304	0.0408974	0.0345221	0.0290015	0.0241325
54	0.0422037	0.0632796	0.0829984	0.0974379	0.104532	0.104401	0.0986757	0.0895244	0.0789089	0.0682411	0.0583494	0.0496007	0.0420573	0.0356119	0.0300816	0.0252674
55	0.0424695	0.0634714	0.0833835	0.0983618	0.106225	0.106868	0.101726	0.0928719	0.0822746	0.0714183	0.0612226	0.0521355	0.0442793	0.0375839	0.0318855	0.0269893
56	0.0441928	0.0656377	0.0861567	0.101924	0.110637	0.112002	0.107295	0.0985284	0.0877094	0.0764146	0.06567	0.0560148	0.0476366	0.040505	0.034475	0.0293561
57	0.0474374	0.0698238	0.091355	0.108169	0.117835	0.119892	0.115493	0.106623	0.0953502	0.0833663	0.0718207	0.0613566	0.0522347	0.0444681	0.037932	0.0324398
58	0.0523422	0.0761606	0.099103	0.117223	0.127955	0.13069	0.126485	0.117326	0.10537	0.0924412	0.0798321	0.0683039	0.0582004	0.0495839	0.0423517	0.0363215
59	0.0591013	0.084836	0.109579	0.129258	0.141167	0.144566	0.140446	0.130817	0.117945	0.103811	0.0898662	0.077005	0.065666	0.0559674	0.0478325	0.0410836
