# Supplementary material for: Unexpected long-term variations of Saturn’s ring current revealed by energetic neutral atom imaging
Source: Research Square preprint supplement (doi:10.21203/rs.3.rs-3271171/v1), 2023-09-18
Supplement: Supplementary file 23 [file ec04238ff06a636a89df4c2c.xlsx]

## Sheet: ff2
	0	1	2	3	4	5	6	7	8	9	10	11	12	13	14	15	16	17	18	19	20	21	22	23	24	25	26	27	28	29
0	0.294525	0.307247	0.36411	0.39324	0.412177	0.452998	0.494347	0.529989	0.565927	0.576083	0.591832	0.565521	0.542219	0.542518	0.518001	0.464507	0.440656	0.407893	0.360379	0.271923	0.223277	0.177718	0.146286	0.129867	0.136486	0.13713	0.122299	0.102901	0.0930634	0.089516
1	0.279798	0.281745	0.312817	0.360067	0.385786	0.413557	0.455873	0.484808	0.521589	0.542636	0.553732	0.573402	0.555869	0.545025	0.544754	0.485878	0.415245	0.440292	0.410254	0.298998	0.247741	0.196012	0.179851	0.135834	0.113423	0.114012	0.0908557	0.091188	0.0782205	0.0871135
2	0.275224	0.281755	0.323155	0.350871	0.387538	0.410689	0.437312	0.470569	0.514042	0.561657	0.537458	0.531988	0.546963	0.516396	0.510487	0.431132	0.407665	0.36608	0.283117	0.259848	0.176875	0.149983	0.127316	0.11124	0.103018	0.0941679	0.0794772	0.074347	0.0687439	0.0585085
3	0.277227	0.305166	0.314597	0.373856	0.40426	0.416901	0.4582	0.472606	0.481079	0.52058	0.516678	0.516678	0.522237	0.45849	0.440855	0.430445	0.364014	0.335725	0.331714	0.250291	0.195876	0.184495	0.149532	0.115106	0.104912	0.0885091	0.0688293	0.0611136	0.0640104	0.0472163
4	0.269855	0.291903	0.291903	0.345599	0.374774	0.404754	0.414549	0.447682	0.466298	0.491603	0.488963	0.490737	0.461072	0.43646	0.43646	0.397885	0.341491	0.30958	0.270254	0.247817	0.159894	0.134031	0.113073	0.104789	0.0946587	0.086295	0.0606345	0.0635956	0.0646115	0.0482853
5	0.278621	0.271575	0.322195	0.354341	0.373915	0.373915	0.411984	0.423427	0.467652	0.465595	0.489131	0.473312	0.442474	0.442474	0.393674	0.368348	0.303038	0.270373	0.203211	0.176185	0.151141	0.126203	0.110738	0.103656	0.0917999	0.0976058	0.0665855	0.0432833	0.0577003	0.0501022
6	0.278621	0.290603	0.30932	0.34324	0.378897	0.394156	0.405063	0.437598	0.465567	0.461623	0.448284	0.458489	0.444357	0.420274	0.347724	0.339522	0.287748	0.287748	0.205141	0.147269	0.134029	0.121529	0.121529	0.103822	0.103822	0.0897718	0.0743974	0.0743974	0.0679673	0.0753876
7	0.276769	0.300204	0.332498	0.337918	0.375369	0.396417	0.396417	0.446946	0.43734	0.442738	0.433325	0.415229	0.398215	0.390393	0.359259	0.340671	0.279321	0.237634	0.237634	0.160577	0.114858	0.118187	0.111061	0.103356	0.0895197	0.0811486	0.0784228	0.0730909	0.057908	0.0624128
8	0.28457	0.324455	0.332498	0.351937	0.398465	0.427117	0.427117	0.423716	0.429155	0.459058	0.44394	0.452269	0.424398	0.406816	0.36325	0.340843	0.285616	0.282633	0.282633	0.181771	0.134565	0.131477	0.122441	0.125315	0.112965	0.111149	0.0936428	0.096224	0.0729732	0.0602695
9	0.300949	0.321527	0.331197	0.380289	0.416889	0.411863	0.441492	0.444898	0.44966	0.452889	0.437275	0.430263	0.39499	0.360322	0.337126	0.306394	0.261796	0.261796	0.202959	0.151624	0.13534	0.129291	0.129291	0.121229	0.122115	0.0964196	0.0879689	0.0879689	0.0780798	0.0720151
10	0.300949	0.340765	0.372139	0.407642	0.420132	0.420132	0.448071	0.477952	0.485806	0.488937	0.465131	0.44463	0.39836	0.39836	0.321827	0.317495	0.277799	0.253286	0.172221	0.149291	0.143262	0.130751	0.134953	0.126568	0.125114	0.121761	0.112529	0.0999957	0.0884495	0.0824352
11	0.344227	0.354696	0.354696	0.412202	0.435672	0.449615	0.486033	0.501523	0.51211	0.509689	0.486495	0.478577	0.444813	0.414621	0.414621	0.368795	0.341279	0.320749	0.234456	0.20994	0.155894	0.146226	0.12264	0.114337	0.113537	0.103158	0.102047	0.0951752	0.0808458	0.0807471
12	0.325886	0.352897	0.37933	0.442453	0.471523	0.499402	0.528716	0.510202	0.540238	0.536065	0.499004	0.499004	0.481165	0.441735	0.418346	0.382495	0.33569	0.337239	0.321279	0.278583	0.229603	0.212992	0.170241	0.1498	0.135132	0.12917	0.113765	0.116879	0.116801	0.0965012
13	0.339393	0.361776	0.385367	0.430979	0.489075	0.510427	0.534822	0.536766	0.562554	0.559548	0.53993	0.558294	0.519824	0.489861	0.431699	0.380668	0.368104	0.361784	0.336791	0.253519	0.234304	0.213805	0.185668	0.180686	0.167412	0.157025	0.144082	0.136382	0.130677	0.112083
14	0.353393	0.390404	0.410206	0.453557	0.488101	0.528742	0.578601	0.579961	0.598448	0.589857	0.577849	0.538452	0.5236	0.516005	0.47955	0.444295	0.438783	0.399393	0.37442	0.323942	0.299308	0.283094	0.262572	0.237039	0.160595	0.160376	0.158613	0.148331	0.14305	0.122962
15	0.400678	0.439665	0.477971	0.516171	0.549845	0.591664	0.608425	0.610182	0.605809	0.593639	0.585369	0.588128	0.5513	0.526028	0.500874	0.48663	0.440966	0.383019	0.349171	0.325758	0.296946	0.282266	0.248619	0.23203	0.192375	0.183437	0.163513	0.156225	0.145209	0.138455
16	0.406943	0.439505	0.486215	0.508875	0.553719	0.570798	0.597531	0.605184	0.620691	0.62057	0.628568	0.651032	0.62428	0.589679	0.581019	0.533093	0.511991	0.44108	0.430982	0.411193	0.364205	0.355472	0.327485	0.308903	0.298266	0.284966	0.224843	0.198196	0.158699	0.156468
17	0.435507	0.476764	0.499233	0.541484	0.571181	0.61822	0.644366	0.645374	0.671926	0.653429	0.673324	0.681511	0.648556	0.608272	0.588715	0.574953	0.526036	0.475918	0.437458	0.398726	0.368675	0.353613	0.335664	0.318427	0.289985	0.248233	0.206715	0.19334	0.185282	0.161327
18	0.473992	0.517029	0.542802	0.607415	0.65581	0.655584	0.67548	0.710527	0.684427	0.671462	0.700616	0.700616	0.697606	0.667344	0.613668	0.585524	0.561145	0.527235	0.477357	0.460366	0.423049	0.387793	0.347895	0.347752	0.31644	0.304354	0.277708	0.237162	0.193944	0.18364
19	0.508624	0.541107	0.541107	0.599223	0.638013	0.69248	0.714945	0.732817	0.743926	0.747198	0.730581	0.707815	0.685983	0.664513	0.664513	0.616388	0.605953	0.55721	0.52656	0.489472	0.452877	0.429501	0.402022	0.370867	0.334216	0.324628	0.320211	0.310978	0.29446	0.288124
20	0.481161	0.52729	0.555859	0.64099	0.658136	0.674273	0.703607	0.736665	0.72473	0.758026	0.742263	0.745643	0.719589	0.727163	0.694366	0.667222	0.646024	0.594231	0.566783	0.540306	0.540306	0.491765	0.470009	0.434489	0.429657	0.379402	0.344169	0.320958	0.320958	0.297663
21	0.499656	0.547069	0.605828	0.632358	0.678518	0.713995	0.738562	0.735953	0.753537	0.759045	0.743151	0.788916	0.750677	0.726486	0.722575	0.680853	0.645626	0.645626	0.60978	0.581715	0.540695	0.493623	0.493623	0.459572	0.444028	0.404147	0.367761	0.367761	0.35181	0.335071
22	0.535971	0.592805	0.625649	0.628469	0.70259	0.72985	0.72985	0.726362	0.726506	0.786473	0.780228	0.796832	0.771356	0.753569	0.750328	0.712545	0.686913	0.640453	0.640453	0.596851	0.551104	0.535594	0.527021	0.497498	0.485527	0.447591	0.438172	0.402821	0.392137	0.382429
23	0.52804	0.609508	0.625649	0.66448	0.732478	0.743427	0.743427	0.757334	0.745691	0.754166	0.772307	0.788071	0.776049	0.752556	0.753455	0.749405	0.716814	0.684405	0.684405	0.63362	0.589537	0.563475	0.531076	0.491303	0.50324	0.479037	0.457536	0.466174	0.43916	0.404659
24	0.575053	0.589933	0.643236	0.667901	0.735618	0.757586	0.782378	0.78614	0.776883	0.790201	0.766135	0.771641	0.765976	0.788523	0.783576	0.765416	0.713704	0.713704	0.691662	0.662181	0.642717	0.5757	0.5757	0.559643	0.548864	0.515226	0.478091	0.478091	0.449139	0.433583
25	0.575053	0.621032	0.65353	0.703822	0.725175	0.725175	0.791372	0.786874	0.811839	0.782359	0.788068	0.776153	0.759371	0.759371	0.777783	0.778093	0.72132	0.696827	0.666414	0.649656	0.649325	0.6518	0.632158	0.609299	0.562465	0.543525	0.493573	0.470225	0.460778	0.45136
26	0.608998	0.653791	0.653791	0.695886	0.716001	0.751211	0.747217	0.782868	0.783587	0.777585	0.805276	0.797703	0.787437	0.781513	0.781513	0.738659	0.7384	0.728278	0.709108	0.69583	0.655407	0.638792	0.616428	0.621992	0.590835	0.56749	0.559967	0.528374	0.524995	0.500661
27	0.617864	0.652035	0.677537	0.722157	0.744511	0.77232	0.804767	0.817627	0.822599	0.817473	0.822764	0.822764	0.837524	0.794478	0.794817	0.773409	0.747477	0.730176	0.730698	0.712538	0.69352	0.69426	0.689538	0.666207	0.663371	0.64266	0.614021	0.602328	0.586893	0.546726
28	0.60154	0.636636	0.661439	0.710069	0.734927	0.777463	0.78774	0.798646	0.812786	0.817052	0.842512	0.851989	0.857196	0.845293	0.830626	0.788777	0.772684	0.767909	0.76158	0.738285	0.724483	0.729064	0.716607	0.689398	0.656795	0.646324	0.640567	0.632339	0.630279	0.607734
29	0.583674	0.620739	0.65149	0.706364	0.739855	0.756226	0.785755	0.794549	0.796735	0.811885	0.82666	0.835991	0.843549	0.840316	0.838023	0.827162	0.805124	0.792485	0.780533	0.770169	0.75699	0.746832	0.73387	0.727524	0.701677	0.687577	0.656722	0.642723	0.617634	0.590862
30	0.57627	0.614163	0.642654	0.69645	0.754994	0.762398	0.792756	0.79789	0.815009	0.824742	0.824759	0.836619	0.824404	0.825979	0.830632	0.82283	0.811761	0.805734	0.810684	0.823157	0.779034	0.765755	0.742897	0.733801	0.711268	0.68422	0.663025	0.642254	0.620014	0.595313
31	0.633188	0.649887	0.672866	0.709693	0.745224	0.776776	0.782736	0.78986	0.820581	0.850574	0.873343	0.875315	0.875285	0.882371	0.857099	0.858156	0.860351	0.852295	0.838129	0.836731	0.839201	0.806815	0.775388	0.761763	0.734781	0.711107	0.67254	0.657167	0.635412	0.625382
32	0.638993	0.681428	0.707218	0.730272	0.767426	0.798567	0.823203	0.849289	0.858171	0.85712	0.89503	0.889109	0.897052	0.88038	0.887086	0.852521	0.849843	0.833646	0.827512	0.806495	0.7789	0.7669	0.748003	0.728207	0.72096	0.699038	0.685951	0.658551	0.633247	0.630242
33	0.667812	0.684024	0.7183	0.760423	0.788259	0.802201	0.843828	0.865076	0.879584	0.880469	0.888154	0.888154	0.891394	0.905057	0.900938	0.86149	0.854636	0.827279	0.827324	0.82713	0.808475	0.796837	0.763422	0.749341	0.739908	0.717022	0.710346	0.680665	0.664559	0.65843
34	0.675263	0.698553	0.698553	0.756623	0.780487	0.828512	0.845129	0.851115	0.872795	0.874769	0.890738	0.890383	0.877782	0.878977	0.878977	0.901352	0.897311	0.879461	0.861923	0.847009	0.830702	0.815066	0.789605	0.781749	0.765049	0.766282	0.746444	0.706797	0.690345	0.696209
35	0.664872	0.708535	0.740268	0.771209	0.802248	0.816921	0.830666	0.84606	0.867103	0.904072	0.917969	0.924456	0.903796	0.926644	0.915777	0.909236	0.886364	0.873034	0.866841	0.834867	0.834867	0.808062	0.805964	0.787886	0.771811	0.75896	0.735022	0.718678	0.718678	0.699807
36	0.684873	0.677313	0.728458	0.77362	0.809136	0.828634	0.858498	0.885482	0.934518	0.939363	0.930132	0.947707	0.924167	0.924132	0.910203	0.892271	0.889517	0.889517	0.884375	0.845084	0.846741	0.821925	0.821925	0.81387	0.808808	0.790891	0.76867	0.76867	0.743659	0.732585
37	0.653707	0.682611	0.73893	0.756509	0.814141	0.881365	0.881365	0.894983	0.893693	0.923336	0.925982	0.925523	0.923686	0.921751	0.925094	0.917984	0.899877	0.881599	0.881599	0.867922	0.835565	0.828622	0.839367	0.814632	0.803461	0.776908	0.746773	0.747	0.72623	0.723007
38	0.649765	0.712118	0.73893	0.762742	0.822169	0.853003	0.853003	0.893259	0.916895	0.950718	0.94459	0.95826	0.991911	0.966788	0.950268	0.949051	0.928907	0.917862	0.917862	0.90344	0.866132	0.857925	0.835266	0.818834	0.817888	0.789138	0.75698	0.74245	0.704519	0.707367
39	0.64779	0.678102	0.738211	0.772952	0.823794	0.856505	0.880006	0.919023	0.950132	0.946991	0.962775	0.948619	0.962589	0.987424	0.977963	0.954267	0.938727	0.938727	0.915014	0.875163	0.858883	0.837133	0.837133	0.815621	0.797606	0.779545	0.755859	0.755859	0.729989	0.725287
40	0.64779	0.693536	0.756185	0.790215	0.848875	0.848875	0.888322	0.913428	0.912038	0.936752	0.980689	0.97397	0.981814	0.981814	0.990492	0.948019	0.918568	0.923335	0.897137	0.88839	0.887528	0.892873	0.860784	0.825729	0.808792	0.793034	0.757318	0.733577	0.727311	0.69521
41	0.659378	0.690457	0.690457	0.775276	0.803348	0.83267	0.864975	0.882439	0.936215	0.936688	0.955045	0.974768	0.975185	0.959533	0.959533	0.943521	0.954482	0.943921	0.926284	0.916489	0.879045	0.845715	0.829183	0.812873	0.782663	0.780593	0.780959	0.757973	0.740236	0.720595
42	0.642982	0.681053	0.734828	0.774634	0.808855	0.85386	0.878878	0.924268	0.938074	0.943906	0.969735	0.969735	0.975324	0.980124	0.965632	0.972388	0.951871	0.929343	0.928809	0.885746	0.861581	0.858394	0.844268	0.807901	0.78784	0.776647	0.74464	0.716364	0.698312	0.689677
43	0.6129	0.658274	0.73373	0.750593	0.792093	0.830043	0.858908	0.901817	0.94165	0.972229	0.975735	0.970343	0.986438	0.97161	0.973791	0.957424	0.944739	0.917668	0.910269	0.902268	0.870581	0.849448	0.817701	0.785946	0.798159	0.768137	0.755838	0.726842	0.711591	0.67162
44	0.574246	0.630934	0.682304	0.728493	0.790247	0.82552	0.870081	0.919109	0.956569	0.956753	0.986407	0.971675	1	0.978897	0.967116	0.968793	0.945675	0.913062	0.894122	0.856534	0.853039	0.839673	0.836754	0.829129	0.821531	0.798023	0.742553	0.729121	0.693209	0.656204
45	0.562606	0.621778	0.674916	0.718602	0.767047	0.809494	0.839666	0.889022	0.92452	0.932954	0.964943	0.941052	0.930358	0.952628	0.953442	0.927748	0.925013	0.93086	0.90403	0.890106	0.848657	0.813326	0.79246	0.771056	0.766114	0.718688	0.705483	0.64959	0.623493	0.59294
46	0.544461	0.597593	0.654181	0.69348	0.74011	0.800712	0.831173	0.864564	0.919714	0.939985	0.934682	0.935686	0.965402	0.976275	0.959782	0.953404	0.936911	0.904553	0.876211	0.844208	0.823078	0.768263	0.732095	0.699239	0.67637	0.667453	0.655965	0.638469	0.626926	0.580442
47	0.537077	0.582623	0.651007	0.712013	0.752689	0.798925	0.803477	0.853698	0.892768	0.909594	0.921149	0.952185	0.945854	0.936544	0.940833	0.917203	0.893009	0.835129	0.793548	0.799857	0.771321	0.748715	0.713467	0.673398	0.666259	0.641932	0.599239	0.601524	0.577471	0.537984
48	0.541145	0.580511	0.647211	0.714723	0.747495	0.772256	0.821308	0.889387	0.921222	0.911504	0.920001	0.920001	0.905264	0.92568	0.918813	0.898177	0.851685	0.824888	0.813587	0.803431	0.761718	0.757893	0.732228	0.664494	0.65186	0.585575	0.545947	0.507749	0.483359	0.428763
49	0.535827	0.58336	0.58336	0.657276	0.70179	0.760864	0.788742	0.837346	0.855868	0.874323	0.901075	0.907217	0.91023	0.895658	0.895658	0.843959	0.837571	0.811915	0.792248	0.771748	0.722116	0.682554	0.602284	0.606466	0.597268	0.579478	0.538805	0.485963	0.466673	0.435279
50	0.473432	0.54584	0.608449	0.66963	0.735946	0.735946	0.778305	0.803176	0.864122	0.876894	0.864829	0.879188	0.873751	0.873751	0.851801	0.826774	0.763691	0.772142	0.723988	0.713761	0.672635	0.660787	0.58849	0.55661	0.525417	0.456521	0.460122	0.41678	0.437385	0.429448
51	0.473432	0.481337	0.539284	0.623047	0.698421	0.767904	0.747942	0.781652	0.844643	0.832745	0.86206	0.85795	0.851386	0.842581	0.80094	0.789281	0.77665	0.77665	0.740182	0.713481	0.686289	0.644076	0.644076	0.567975	0.521553	0.477783	0.48457	0.48457	0.471832	0.462165
52	0.452665	0.491499	0.505003	0.560441	0.65034	0.715277	0.715277	0.778193	0.837534	0.859997	0.86269	0.807303	0.828628	0.825611	0.829139	0.800103	0.780763	0.758921	0.758921	0.721468	0.634144	0.611092	0.570652	0.552244	0.564886	0.501924	0.481347	0.47267	0.447318	0.480019
53	0.425012	0.448088	0.505003	0.532113	0.619903	0.682404	0.682404	0.739438	0.813134	0.815714	0.860678	0.853995	0.848154	0.825327	0.803543	0.799154	0.709356	0.727886	0.727886	0.622666	0.596803	0.520831	0.540147	0.524449	0.49053	0.482958	0.471096	0.465084	0.384315	0.402988
54	0.394755	0.415227	0.484931	0.530258	0.605048	0.628118	0.656703	0.679277	0.727623	0.826302	0.805096	0.812512	0.83121	0.785674	0.733264	0.720725	0.712924	0.712924	0.643346	0.557791	0.498874	0.434966	0.434966	0.474511	0.499993	0.477686	0.484432	0.484432	0.474144	0.478136
55	0.357446	0.428581	0.449797	0.511459	0.552052	0.579545	0.613712	0.680919	0.696291	0.759853	0.763798	0.800199	0.780693	0.803955	0.793766	0.760897	0.677216	0.63439	0.591393	0.55047	0.55047	0.502775	0.467716	0.390577	0.391868	0.443878	0.433737	0.368495	0.368495	0.367094
56	0.374646	0.405014	0.405014	0.476821	0.488447	0.584664	0.624976	0.647249	0.698286	0.751625	0.771577	0.757213	0.731638	0.721923	0.721923	0.694629	0.632598	0.62785	0.57678	0.5418	0.438632	0.439072	0.410304	0.39843	0.317879	0.37228	0.387573	0.357437	0.342646	0.369049
57	0.351351	0.384025	0.407953	0.473455	0.527757	0.562129	0.571727	0.619633	0.651225	0.695626	0.720692	0.720692	0.69885	0.708813	0.706791	0.656274	0.5401	0.516504	0.496632	0.485182	0.427719	0.376894	0.346814	0.358493	0.289971	0.245307	0.270854	0.243436	0.20092	0.234856
58	0.338991	0.346573	0.389289	0.410816	0.437076	0.506897	0.520827	0.583762	0.602508	0.650774	0.663583	0.641185	0.647245	0.649347	0.620002	0.59088	0.540639	0.532661	0.486682	0.460282	0.38795	0.376345	0.314737	0.30767	0.277746	0.223827	0.166048	0.151054	0.152114	0.182569
59	0.309589	0.321978	0.345035	0.385556	0.429991	0.449416	0.486697	0.522237	0.584916	0.588243	0.588895	0.610662	0.611851	0.629871	0.573923	0.562781	0.542487	0.460968	0.425469	0.375251	0.360875	0.318984	0.295834	0.26477	0.229377	0.175418	0.151091	0.13424	0.131747	0.133459
