# Supplementary material for: Unexpected long-term variations of Saturn’s ring current revealed by energetic neutral atom imaging
Source: Research Square preprint supplement (doi:10.21203/rs.3.rs-3271171/v1), 2023-09-18
Supplement: Supplementary file 25 [file f3e58894f9d2adf6e17c79c2.xlsx]

## Sheet: ff6
	0	1	2	3	4	5	6	7	8	9	10	11	12	13	14	15	16	17	18	19	20	21	22	23	24	25	26	27	28	29
0	0.404627	0.407515	0.416458	0.42097	0.420567	0.426144	0.433764	0.44771	0.480683	0.508458	0.513834	0.504839	0.481104	0.485237	0.467828	0.474392	0.472856	0.455338	0.442405	0.439759	0.437033	0.428898	0.445312	0.402139	0.386134	0.360166	0.32555	0.321899	0.28785	0.2298
1	0.396851	0.409783	0.407852	0.411749	0.426113	0.440391	0.444391	0.44854	0.477463	0.507583	0.484187	0.502293	0.494078	0.505101	0.508701	0.468651	0.466566	0.460596	0.457372	0.467099	0.454462	0.454941	0.418895	0.39389	0.382479	0.335384	0.300308	0.289715	0.24786	0.201177
2	0.413248	0.420247	0.424711	0.424105	0.437404	0.468511	0.467994	0.465843	0.488328	0.484472	0.486855	0.506615	0.514299	0.500128	0.502075	0.51211	0.493827	0.484957	0.48436	0.47289	0.464646	0.435299	0.41938	0.414368	0.38597	0.342239	0.273408	0.255358	0.202219	0.187833
3	0.435784	0.432436	0.431954	0.441678	0.4694	0.496672	0.458991	0.494952	0.490793	0.470315	0.532394	0.532394	0.511355	0.538194	0.536017	0.507895	0.54619	0.508405	0.51116	0.500003	0.490705	0.485362	0.477917	0.451632	0.440386	0.443658	0.412933	0.403511	0.361495	0.36502
4	0.438018	0.446826	0.446826	0.455431	0.473673	0.48331	0.497719	0.516365	0.536617	0.532491	0.518233	0.53701	0.529006	0.549673	0.549673	0.546461	0.544259	0.52382	0.512494	0.49386	0.478223	0.47701	0.458575	0.455522	0.416806	0.412173	0.41161	0.394486	0.384847	0.289279
5	0.44783	0.447805	0.490362	0.47225	0.4861	0.4861	0.508013	0.519685	0.535883	0.552816	0.559769	0.545171	0.55207	0.55207	0.581706	0.581191	0.58593	0.544946	0.539906	0.533105	0.503436	0.496029	0.474512	0.452963	0.439228	0.413109	0.414788	0.403041	0.423808	0.40877
6	0.44783	0.490066	0.511335	0.497391	0.502321	0.502193	0.540499	0.542082	0.523097	0.571017	0.57847	0.592905	0.577863	0.572323	0.594668	0.56993	0.569594	0.569594	0.54111	0.535065	0.525352	0.550699	0.550699	0.499841	0.481672	0.471215	0.466025	0.466025	0.444058	0.439577
7	0.464717	0.521643	0.530745	0.525936	0.555934	0.575541	0.575541	0.554366	0.592586	0.550248	0.605586	0.633605	0.61752	0.619415	0.615092	0.610543	0.603112	0.60319	0.60319	0.589387	0.600483	0.582448	0.569845	0.525239	0.522722	0.483016	0.480559	0.471243	0.451662	0.462913
8	0.496348	0.5124	0.530745	0.525681	0.575471	0.608156	0.608156	0.610762	0.626385	0.634644	0.634884	0.658685	0.674268	0.676162	0.662396	0.687068	0.675042	0.7	0.7	0.670488	0.603048	0.60785	0.586207	0.565226	0.555873	0.522527	0.485365	0.486101	0.479014	0.474935
9	0.50478	0.507757	0.54929	0.573916	0.606086	0.599434	0.604851	0.613359	0.636511	0.631304	0.659574	0.661143	0.69834	0.7158	0.736638	0.763137	0.696607	0.696607	0.681258	0.710233	0.686823	0.619488	0.619488	0.586976	0.578733	0.568002	0.537721	0.537721	0.539563	0.537173
10	0.50478	0.551447	0.559071	0.583071	0.596205	0.596205	0.618732	0.633337	0.658387	0.689229	0.70724	0.704984	0.740113	0.740113	0.753308	0.759993	0.747679	0.742821	0.72347	0.722105	0.693861	0.671351	0.62696	0.635592	0.631734	0.60892	0.549304	0.538159	0.51378	0.525972
11	0.542059	0.553477	0.553477	0.578674	0.600695	0.603973	0.650268	0.651855	0.663551	0.692555	0.711805	0.729363	0.763075	0.762847	0.762847	0.741352	0.750666	0.775525	0.773763	0.750132	0.737761	0.707681	0.65618	0.661381	0.623932	0.620962	0.585424	0.572883	0.559788	0.5635
12	0.555851	0.557824	0.58639	0.590324	0.637044	0.675949	0.671044	0.721065	0.720489	0.736088	0.725384	0.725384	0.764407	0.799926	0.794236	0.789232	0.800342	0.822666	0.804037	0.804952	0.759167	0.715838	0.700639	0.666473	0.664215	0.6382	0.629348	0.59999	0.562479	0.548667
13	0.555081	0.54157	0.598139	0.624933	0.636103	0.684731	0.682192	0.705075	0.724025	0.752461	0.759054	0.794707	0.792721	0.812484	0.839144	0.859284	0.867702	0.815474	0.808564	0.796159	0.803856	0.815451	0.801463	0.754653	0.698696	0.665224	0.641686	0.605962	0.602487	0.590739
14	0.54943	0.55392	0.612889	0.608101	0.644797	0.67539	0.716369	0.736954	0.739002	0.762677	0.767802	0.796239	0.812586	0.851943	0.867463	0.857386	0.861463	0.841007	0.82974	0.812741	0.802173	0.801687	0.787594	0.755748	0.733719	0.71193	0.685103	0.646738	0.605413	0.569347
15	0.582082	0.61728	0.640861	0.667839	0.677496	0.713464	0.742222	0.753738	0.770294	0.798646	0.839822	0.849192	0.877341	0.86663	0.869771	0.865683	0.867318	0.840585	0.833999	0.815312	0.795768	0.801301	0.767268	0.769047	0.742821	0.698055	0.674857	0.655563	0.620666	0.597047
16	0.623075	0.638098	0.662446	0.673441	0.677607	0.721951	0.749331	0.756623	0.77798	0.805176	0.85623	0.90093	0.89113	0.879253	0.906723	0.923318	0.936009	0.895281	0.855078	0.856516	0.851611	0.817962	0.834267	0.802187	0.757022	0.735487	0.688546	0.660867	0.632226	0.610222
17	0.648072	0.658198	0.672578	0.707616	0.718297	0.763758	0.791277	0.829537	0.844074	0.865897	0.878047	0.895833	0.894572	0.876186	0.879787	0.912361	0.87387	0.903196	0.871387	0.851977	0.825071	0.807088	0.79885	0.787993	0.754488	0.741898	0.70102	0.642129	0.579439	0.548687
18	0.659223	0.672567	0.703817	0.750763	0.771038	0.772211	0.800188	0.812551	0.819777	0.851267	0.873317	0.873317	0.912504	0.931317	0.92461	0.921851	0.90691	0.886253	0.86913	0.848279	0.832227	0.799548	0.770577	0.724863	0.732484	0.715612	0.694815	0.655821	0.603703	0.569001
19	0.663257	0.702769	0.702769	0.736327	0.756716	0.837968	0.831571	0.829927	0.85491	0.858415	0.891783	0.897705	0.922928	0.938309	0.938309	0.939565	0.918645	0.912084	0.876031	0.862415	0.827896	0.797856	0.752542	0.751904	0.752081	0.716061	0.707302	0.703995	0.675471	0.620159
20	0.656786	0.697629	0.720036	0.748167	0.782629	0.811636	0.824937	0.85489	0.867947	0.910136	0.892221	0.940707	0.915247	0.928567	0.901982	0.920862	0.907864	0.888938	0.859878	0.803538	0.803538	0.761965	0.769374	0.7268	0.709183	0.684269	0.66186	0.631519	0.631519	0.609168
21	0.666164	0.703359	0.752979	0.753894	0.779519	0.835498	0.835482	0.838561	0.852173	0.906124	0.913044	0.92109	0.948504	0.931501	0.917184	0.906251	0.890143	0.890143	0.822812	0.790052	0.751004	0.770013	0.770013	0.763769	0.72207	0.707858	0.672829	0.672829	0.62492	0.611624
22	0.703465	0.73555	0.7409	0.762929	0.808877	0.859219	0.859219	0.86223	0.895501	0.908935	0.926532	0.958873	0.918135	0.937492	0.93778	0.914771	0.864753	0.845908	0.845908	0.789434	0.770814	0.775792	0.736367	0.716608	0.717695	0.680311	0.645491	0.640148	0.623675	0.588926
23	0.704457	0.742553	0.7409	0.778988	0.819368	0.864487	0.864487	0.871649	0.899357	0.953815	0.934426	0.958301	0.950474	0.929272	0.899874	0.885661	0.840327	0.820601	0.820601	0.764297	0.719465	0.695576	0.677086	0.646892	0.637224	0.618369	0.604064	0.61129	0.583429	0.542489
24	0.740497	0.737931	0.770854	0.824641	0.838556	0.864459	0.865615	0.886073	0.95434	0.958699	0.971967	0.950159	0.941101	0.886685	0.877525	0.886268	0.838053	0.838053	0.7777	0.732551	0.714515	0.69212	0.69212	0.676727	0.655635	0.629034	0.598295	0.598295	0.562202	0.552235
25	0.740497	0.775202	0.824659	0.821585	0.865555	0.865555	0.885524	0.916972	0.953131	0.975328	0.98695	0.955654	0.925901	0.925901	0.862819	0.882691	0.855203	0.83118	0.78924	0.757992	0.736091	0.700399	0.660236	0.643456	0.613939	0.601939	0.589914	0.549159	0.553825	0.515168
26	0.757365	0.793833	0.793833	0.808403	0.834233	0.879441	0.928907	0.948257	0.944936	0.970622	0.968302	0.947208	0.916212	0.905589	0.905589	0.882445	0.852148	0.837263	0.763091	0.745486	0.69993	0.666335	0.622239	0.62248	0.620232	0.607935	0.582774	0.553011	0.524639	0.502629
27	0.736549	0.770973	0.773227	0.835852	0.870114	0.908785	0.930558	0.949506	0.978516	1	0.986041	0.986041	0.97319	0.927396	0.907731	0.905805	0.865338	0.869705	0.833924	0.772978	0.716024	0.670211	0.651133	0.633367	0.596488	0.566237	0.52698	0.482022	0.42953	0.402629
28	0.736877	0.749578	0.767674	0.827495	0.858484	0.900113	0.948704	0.985237	0.983315	0.999283	0.985207	0.964705	0.958693	0.918216	0.886909	0.844645	0.826534	0.794386	0.761755	0.724671	0.69422	0.647401	0.611697	0.597958	0.570603	0.550659	0.545636	0.535902	0.500114	0.411831
29	0.716602	0.745269	0.774923	0.826895	0.871001	0.929923	0.932212	0.941196	0.965185	0.96669	0.94481	0.920258	0.918598	0.905425	0.881953	0.860873	0.819635	0.78574	0.778828	0.724436	0.688502	0.636253	0.615687	0.598592	0.577811	0.56212	0.529602	0.481082	0.456332	0.413794
30	0.715007	0.760273	0.79675	0.83051	0.871644	0.897982	0.914412	0.918809	0.927333	0.941558	0.937087	0.938167	0.926629	0.907729	0.850115	0.828292	0.831883	0.803087	0.749763	0.730617	0.688555	0.662122	0.62172	0.596722	0.586274	0.548411	0.525421	0.472994	0.408628	0.363551
31	0.717585	0.767077	0.786721	0.821957	0.829029	0.887907	0.949234	0.938407	0.932896	0.923096	0.914683	0.884108	0.852654	0.87335	0.822561	0.824622	0.797749	0.742235	0.715175	0.686861	0.660611	0.638723	0.605595	0.574127	0.536329	0.518631	0.480193	0.423854	0.402828	0.302984
32	0.736632	0.77365	0.806064	0.850674	0.861188	0.877988	0.887115	0.900039	0.892881	0.914626	0.946555	0.914131	0.90003	0.874588	0.843944	0.795683	0.757484	0.725448	0.726848	0.660527	0.630205	0.594664	0.573324	0.540404	0.519769	0.504039	0.478293	0.44601	0.359903	0.255944
33	0.720498	0.752592	0.787403	0.820633	0.857508	0.88476	0.905982	0.940583	0.937204	0.935354	0.921561	0.921561	0.887562	0.847643	0.796191	0.784156	0.718514	0.685068	0.664269	0.648104	0.616985	0.605736	0.602368	0.548657	0.511478	0.47014	0.4311	0.399079	0.324625	0.247323
34	0.720043	0.746715	0.746715	0.795822	0.830879	0.855686	0.898599	0.911103	0.857424	0.896939	0.889565	0.937608	0.858058	0.843659	0.843659	0.750267	0.692179	0.673557	0.652927	0.641537	0.627001	0.595072	0.550371	0.499405	0.465802	0.460726	0.37473	0.393831	0.380253	0.30547
35	0.696344	0.73344	0.757105	0.819885	0.841601	0.841744	0.868581	0.870834	0.894063	0.848014	0.864468	0.887751	0.913581	0.830087	0.80616	0.725023	0.714837	0.703854	0.676237	0.626393	0.626393	0.59655	0.555667	0.48576	0.479868	0.390342	0.415744	0.363126	0.363126	0.300176
36	0.715295	0.702012	0.783135	0.808204	0.823815	0.818977	0.826705	0.843596	0.883543	0.826504	0.823651	0.850739	0.785543	0.781428	0.74142	0.719632	0.690832	0.690832	0.652113	0.62502	0.6107	0.558237	0.558237	0.504136	0.463303	0.420763	0.308885	0.308885	0.225612	0.227111
37	0.665118	0.724097	0.771243	0.799137	0.772591	0.811422	0.811422	0.824707	0.843953	0.832121	0.825298	0.812993	0.796385	0.740835	0.746133	0.723232	0.670029	0.639948	0.639948	0.604859	0.55097	0.555636	0.510114	0.440996	0.457264	0.396158	0.365928	0.335819	0.219483	0.193815
38	0.636477	0.698803	0.771243	0.733008	0.757717	0.782581	0.782581	0.820753	0.817281	0.841958	0.833043	0.797506	0.795734	0.750109	0.748906	0.708558	0.668841	0.647499	0.647499	0.587411	0.526084	0.523886	0.497774	0.454024	0.414739	0.430897	0.376815	0.319153	0.215971	0.19214
39	0.639039	0.664684	0.689146	0.708587	0.722508	0.779543	0.77773	0.790605	0.840691	0.81299	0.770863	0.781369	0.764191	0.771583	0.747113	0.736376	0.677628	0.677628	0.659608	0.611817	0.591154	0.552032	0.552032	0.497071	0.471678	0.443153	0.392246	0.392246	0.323337	0.243856
40	0.639039	0.620339	0.705392	0.69488	0.736904	0.736904	0.80244	0.80341	0.786192	0.758592	0.770024	0.76689	0.769883	0.769883	0.742861	0.719899	0.679659	0.662253	0.623746	0.592873	0.598598	0.570915	0.50525	0.484302	0.410208	0.335555	0.224965	0.241893	0.219926	0.23092
41	0.623866	0.63423	0.63423	0.687022	0.682338	0.703097	0.726008	0.72859	0.761399	0.763409	0.76311	0.751235	0.735106	0.715374	0.715374	0.689606	0.674427	0.605676	0.616279	0.602763	0.566075	0.555223	0.490064	0.455997	0.403973	0.378154	0.350326	0.328502	0.232025	0.187168
42	0.608075	0.618049	0.63993	0.66295	0.677088	0.686784	0.695087	0.728794	0.726169	0.751361	0.721513	0.721513	0.704732	0.723988	0.708448	0.674653	0.640245	0.620115	0.602538	0.58735	0.534404	0.497734	0.44685	0.388154	0.401555	0.345285	0.363431	0.348496	0.325692	0.311783
43	0.553271	0.555467	0.585123	0.614362	0.640641	0.6687	0.67908	0.696214	0.736829	0.739427	0.697834	0.697814	0.694943	0.679355	0.662876	0.651716	0.626369	0.616571	0.596776	0.547285	0.509574	0.478115	0.447896	0.416121	0.339324	0.282559	0.262197	0.201407	0.210403	0.193602
44	0.522254	0.516388	0.542044	0.576007	0.593991	0.612561	0.63927	0.656533	0.684943	0.70576	0.709533	0.691538	0.684054	0.673381	0.675596	0.646061	0.619324	0.585725	0.556252	0.547688	0.52237	0.494216	0.467561	0.434907	0.419192	0.380338	0.336585	0.319865	0.314465	0.225909
45	0.505853	0.537576	0.536036	0.539188	0.576264	0.59695	0.615846	0.62644	0.636038	0.651538	0.649549	0.653925	0.667754	0.677149	0.64092	0.62097	0.573662	0.575718	0.558484	0.538947	0.50945	0.482171	0.446157	0.439554	0.416989	0.394454	0.329455	0.30308	0.275282	0.245987
46	0.490514	0.514642	0.537794	0.568578	0.588263	0.596598	0.60879	0.612711	0.621442	0.642313	0.644484	0.653974	0.648387	0.628672	0.622374	0.611835	0.568202	0.56934	0.545834	0.525524	0.508521	0.491007	0.448759	0.415708	0.403994	0.389313	0.371591	0.317575	0.285779	0.237246
47	0.494375	0.512188	0.539214	0.553198	0.590268	0.584223	0.611728	0.606103	0.619795	0.637854	0.635595	0.646782	0.638802	0.625137	0.61252	0.583457	0.566583	0.54654	0.551625	0.476661	0.439859	0.424648	0.394211	0.405698	0.256581	0.291209	0.259973	0.282933	0.210771	0.21818
48	0.508059	0.512708	0.521453	0.536107	0.554822	0.58029	0.588523	0.583636	0.59011	0.611799	0.602828	0.602828	0.633506	0.604782	0.598716	0.57025	0.582494	0.549966	0.509926	0.470794	0.459621	0.423026	0.398303	0.334925	0.314608	0.283946	0.307265	0.258702	0.217879	0.169771
49	0.492977	0.499479	0.499479	0.512146	0.524313	0.529158	0.567115	0.590611	0.584406	0.580291	0.593654	0.596431	0.606447	0.611465	0.611465	0.598988	0.582194	0.545781	0.531519	0.490987	0.469649	0.459329	0.424687	0.387129	0.344614	0.32101	0.276888	0.232138	0.207196	0.174031
50	0.470891	0.502002	0.503293	0.509282	0.497038	0.497038	0.527929	0.54809	0.55261	0.565033	0.587535	0.572464	0.570963	0.570963	0.560158	0.575572	0.530694	0.538618	0.490872	0.457227	0.422686	0.41354	0.355764	0.327592	0.298052	0.320899	0.293098	0.232925	0.179215	0.18049
51	0.470891	0.468094	0.479809	0.484687	0.507714	0.517924	0.525981	0.535092	0.539324	0.566927	0.564181	0.566621	0.572565	0.557143	0.539092	0.53634	0.508656	0.508656	0.465422	0.432951	0.419494	0.375246	0.375246	0.328933	0.332308	0.313178	0.242416	0.242416	0.298358	0.229625
52	0.462133	0.465687	0.465916	0.478171	0.480832	0.492187	0.492187	0.526655	0.542147	0.564395	0.546986	0.524939	0.528059	0.511748	0.485581	0.491174	0.468843	0.442856	0.442856	0.449834	0.418677	0.387749	0.383269	0.337206	0.293589	0.301154	0.275286	0.22286	0.186832	0.193857
53	0.451173	0.461309	0.465916	0.467181	0.46957	0.484633	0.484633	0.501982	0.516909	0.512213	0.531546	0.504457	0.514978	0.527732	0.515136	0.522887	0.498099	0.474887	0.474887	0.443727	0.405024	0.42241	0.402553	0.381743	0.375181	0.309472	0.24714	0.268479	0.236641	0.20556
54	0.444654	0.453685	0.458143	0.462866	0.468828	0.464783	0.473224	0.482922	0.49812	0.498284	0.5008	0.506928	0.505609	0.526128	0.516464	0.498823	0.481245	0.481245	0.458821	0.448086	0.430654	0.41583	0.41583	0.389771	0.340888	0.307479	0.248958	0.248958	0.206422	0.198074
55	0.43873	0.44094	0.423417	0.460274	0.458717	0.44703	0.458172	0.495212	0.498556	0.494606	0.493661	0.479793	0.49165	0.488521	0.483301	0.471566	0.46165	0.460687	0.450309	0.440046	0.440046	0.439941	0.428804	0.369437	0.324683	0.28973	0.244117	0.262104	0.262104	0.180042
56	0.433915	0.427548	0.427548	0.4388	0.452653	0.454868	0.467222	0.479998	0.489442	0.480518	0.493592	0.49353	0.510295	0.512375	0.512375	0.472664	0.464085	0.454505	0.4466	0.445837	0.439957	0.449683	0.418233	0.396856	0.375039	0.329422	0.34991	0.291326	0.25926	0.195172
57	0.425322	0.42528	0.435668	0.438625	0.434961	0.460525	0.469528	0.476859	0.476519	0.476309	0.475468	0.475468	0.474597	0.504292	0.466753	0.460271	0.452765	0.457323	0.441736	0.439978	0.448791	0.411741	0.416623	0.394736	0.354265	0.331102	0.325549	0.289164	0.226059	0.165527
58	0.420436	0.420026	0.422617	0.442697	0.45466	0.459017	0.454411	0.47662	0.474857	0.482678	0.497278	0.473543	0.478641	0.48442	0.467956	0.454201	0.452571	0.450272	0.445781	0.443292	0.416574	0.413741	0.418265	0.370594	0.361404	0.249366	0.242681	0.231588	0.189709	0.169081
59	0.409357	0.39585	0.40237	0.409297	0.416134	0.41349	0.433353	0.450399	0.462049	0.469751	0.492515	0.466972	0.464599	0.471318	0.463593	0.458968	0.457335	0.463805	0.46024	0.456735	0.437858	0.443132	0.409003	0.397892	0.349982	0.362445	0.33451	0.307457	0.233433	0.21583
